# Supplementary material
Source: publisher figshare collection journal article supplement (https://acs.figshare.com/ndownloader/files/4279976)
Supplement: Supplementary file 1 [file 4279976]

## Supporting Information

### Axially Chiral *N*-heterocyclic Carbene Gold(I) Complexes Catalyzed Asymmetric Cycloisomerization of 1,6-Enynes

Wenfeng Wang,<sup>a</sup> Jinming Yang,<sup>a</sup> Feijun Wang,<sup>a</sup> and Min Shi<sup>\*a,b</sup>

<sup>a</sup>Key Laboratory for Advanced Materials and Institute of Fine Chemicals, School of Chemistry & Molecular Engineering, East China University of Science and Technology, 130 Mei-Long Road, Shanghai 200237 China.

<sup>b</sup>State Key Laboratory of Organometallic Chemistry, Shanghai Institute of Organic Chemistry, Chinese Academy of Sciences, 354 Fenglin Road, Shanghai 200032 China.

*Mshi@mail.sioc.ac.cn*. Fax 86-21-64166128

#### CONTENTS

|                                                                                                                                                  |           |
|--------------------------------------------------------------------------------------------------------------------------------------------------|-----------|
| (A) General Remarks.                                                                                                                             | S2        |
| (B) Procedures and Spectroscopic Data for the Synthesis of Axially Chiral NHC-Au(I) Complexes <b>1</b> , <b>2a</b> , <b>b</b> and <b>3-11</b> .  | S3-S54    |
| (C) Preparation of 1,6-enynes and Diaryl Sulfoxides.                                                                                             | S54-S67   |
| (D) General Procedure for NHC-Au(I) Complexes-Catalyzed Asymmetric Acetoxycyclization of 1,6-enynes and Analytical Data for Products.            | S67-S76   |
| (E) General Procedure for NHC-Au(I) Complexes-Catalyzed Enantioselective Oxidative Rearrangement of 1,6-enynes and Analytical Data for Products. | S76-S96   |
| (F) References.                                                                                                                                  | S97       |
| (G) X-ray Crystal Data of Complex <b>1</b> .                                                                                                     | S98-S109  |
| (H) X-ray Crystal Data of Complex <b>2a</b> .                                                                                                    | S110-S120 |
| (I) X-ray Crystal Data of Complex <b>6</b> .                                                                                                     | S121-S131 |

### (A) General Remarks.

Unless otherwise stated, all reactions and manipulations were performed using standard Schlenk techniques. All solvents were purified by distillation using standard methods. Commercially available reagents were used without further purification. Melting points were measured on a Yanagimoto micro melting apparatus and uncorrected.  $^1\text{H}$  and  $^{13}\text{C}$  NMR spectra were recorded by using a Varian Mercury vx 300 MHz or Bruker 400 MHz spectrometer in  $\text{CDCl}_3$  with tetramethylsilane (TMS) as an internal standard.  $^1\text{H}$ -NMR and  $^{13}\text{C}$ -NMR chemical shift were referenced to 0.00 ppm (TMS) and 77.0 ppm ( $\text{CDCl}_3$ ), respectively. Coupling constants ( $J$ ) are given in Hz. Optical rotations were determined at 589 nm (sodium D line) by using a Perkin-Elmer 341 MC digital polarimeter with a 10 cm cell ( $c$  given in g per 100 mL) and  $[\alpha]_{\text{D}}$  values are given in  $10^{-1} \text{ deg cm}^2 \text{ g}^{-1}$ . Mass spectra were recorded on the HP-5989 instrument by EI/ESI methods. Infrared spectra were recorded on a Perkin-Elmer PE-983 spectrometer with absorption in  $\text{cm}^{-1}$ . Satisfactory CHN microanalyses were obtained by using a Carlo-Erba 1106 analyzer. X-ray diffraction analysis was performed by using a Bruker Smart-1000 X-ray diffractometer. Chiral HPLC was performed by using a SHIMADZU SPD-10A *vp* series instrument with chiral columns (Chiralpak AD-H column,  $\phi$  4.6  $\times$  250 mm, Daicel Chemical Co. Ltd). All reactions were monitored by TLC with Huanghai GF254 silica gel coated plates. Flash column chromatography was carried out by using 300~400 mesh silica gel at increased pressure, where  $\text{KMnO}_4$  and  $\text{H}_3[\text{P}(\text{Mo}_3\text{O}_{10})_4]\cdot\text{H}_2\text{O}$  were used for visualization.

**(B) Procedures and Spectroscopic Data for the Synthesis of Axially Chiral NHC-Au(I) Complexes 1, 2a, b and 3-11.**

**(1) General Procedure for the Synthesis of Gold(I) Complex 1**

Compound **12**<sup>[1]</sup> (97 mg, 0.2 mmol) and CH<sub>3</sub>I (0.25 mL, 4.0 mmol) in CH<sub>3</sub>CN (4.0 mL) were stirred under reflux for 22 h. After cooling to room temperature, volatiles were removed under reduced pressure and the obtained solid compound **13** was used for the next step without any further purification. The imidazolium salt was obtained in almost quantitative yield at this step.

Under argon atmosphere, to a flame-dried Schlenk tube equipped with a septum and stirring bar were added NHC precursor **13** (77 mg, 0.1 mmol), NaOAc (33 mg, 0.4 mmol) and [(Me<sub>2</sub>S)AuCl] (59 mg, 0.2 mmol) followed by the addition of dry CH<sub>3</sub>CN (5.0 mL) as the solvent. After refluxing at 85 °C for about 9 h, the reaction mixture was cooled to room temperature and filtered through Celite. Then volatiles were removed under reduced pressure and the residue was purified by a silica gel flash column chromatography (eluent: petroleum ether/EtOAc, 1/1) to give **1** as a white solid in 52% yield. Single crystals of complex **1** suitable for an X-ray diffraction study were grown from the solution of **1** in mixed petroleum ether/CH<sub>3</sub>CN/CH<sub>2</sub>Cl<sub>2</sub> (1:2:2) (Scheme S1).

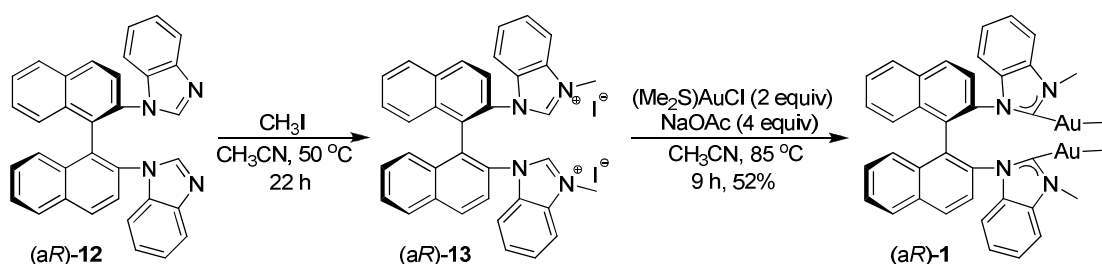

**Compound (aR)-12**

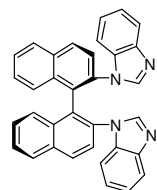

It is a known compound.<sup>[1]</sup> White solid; m.p. 294-295 °C;  $[\alpha]_D^{20} = +563.0$  (*c* 0.5, CHCl<sub>3</sub>); <sup>1</sup>H NMR (300 MHz, CDCl<sub>3</sub>, TMS)  $\delta$  6.11 (d, *J* = 7.8 Hz, 2H), 6.50 (t, *J* = 7.5 Hz, 2H), 6.93-6.99 (m, 2H), 6.99 (s, 2H), 7.43 (d, *J* = 8.4 Hz, 2H), 7.48-7.56 (m, 6H), 7.63-7.69 (m, 2H), 8.07 (d, *J* = 8.4 Hz, 4H).

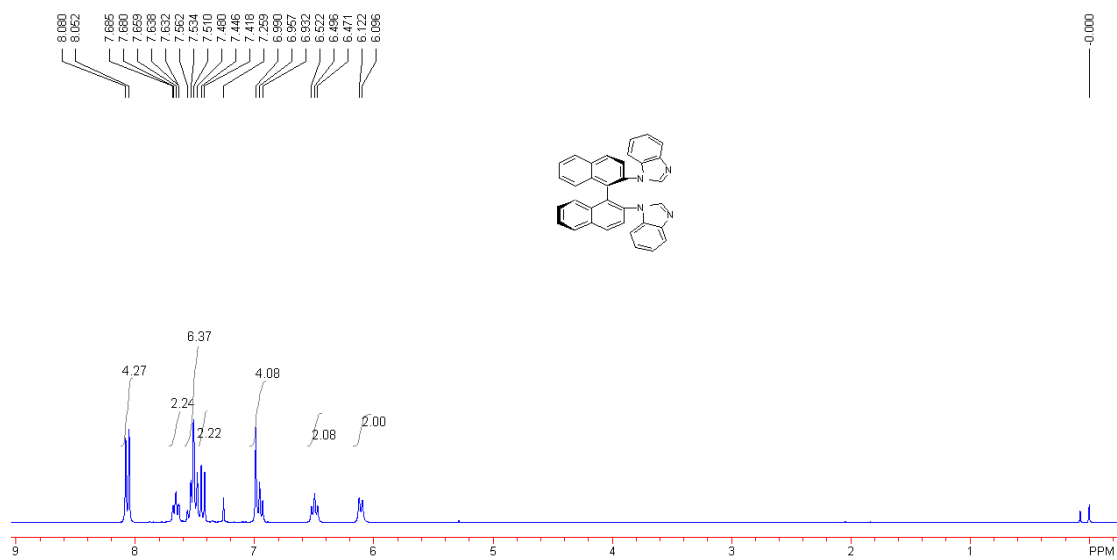

### Complex (aR)-1

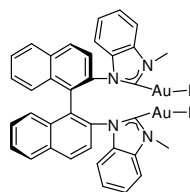

White solid; m.p. 300.4-301.5 °C (dec.).  $[\alpha]_D^{20} = +24$  (*c* 0.25, CHCl<sub>3</sub>). IR (direct irradiation)  $\nu$  3058, 2923, 2852, 1592, 1462, 1436, 1391, 1360, 1261, 1241, 1133, 1099, 1063, 1014, 862, 828, 806, 763, 738, 697 cm<sup>-1</sup>. <sup>1</sup>H NMR (400 MHz, CDCl<sub>3</sub>, TMS)  $\delta$  4.24 (s, 6H), 6.54 (t, *J* = 8.0 Hz, 2H), 6.60 (d, *J* = 8.4 Hz, 2H), 7.14 (t, *J* = 7.6 Hz, 2H), 7.46 (d, *J* = 8.4 Hz, 2H), 7.55-7.70 (m, 8H), 7.95 (d, *J* = 9.2 Hz, 2H), 7.99 (d, *J* = 8.4 Hz, 2H). LRMS (ESI) *m/e* 1035.1 [M<sup>+</sup>-I]; HRMS (ESI) calcd for [C<sub>36</sub>H<sub>26</sub>N<sub>4</sub>I<sub>2</sub>Au<sub>2</sub>-I] requires 1035.0533, found 1035.0527 [M<sup>+</sup>-I].

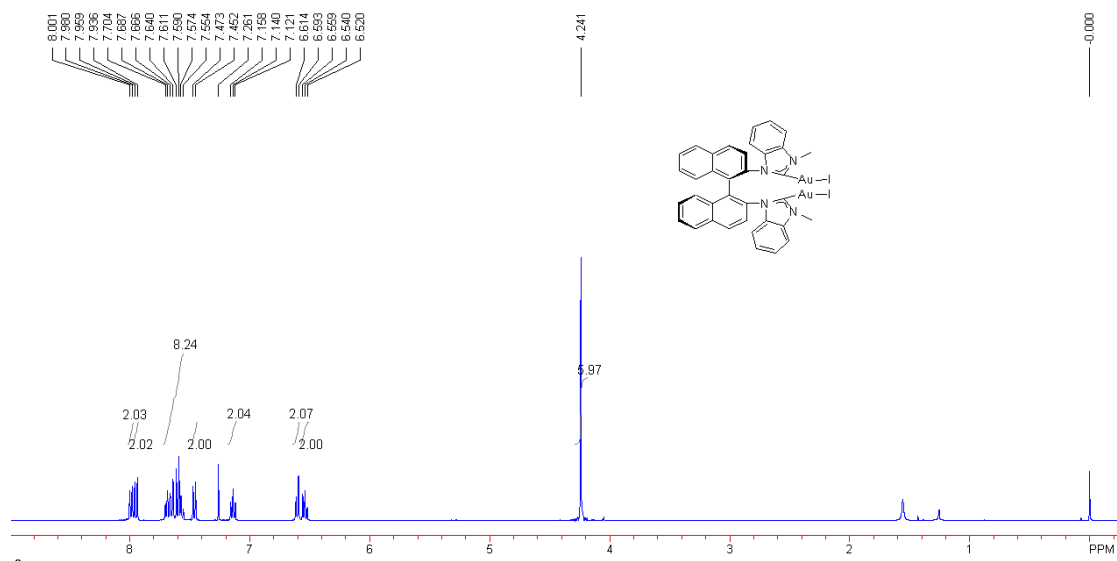

## (2) General Procedure for the Synthesis of Gold(I) Complexes **2a** and **2b**

The precursor of mono-benzimidazole compound (a*S*)-**17** was prepared from (*S*)-binaphthyl-2,2'-diamine (BINAM) according to our previously reported procedures with a sequence of palladium catalyzed coupling, acetylation of primary amine, palladium catalyzed hydrogenation of nitro group, and ring closing with triethyl orthoformate.<sup>[2]</sup>

Compound **17**<sup>[2]</sup> (86 mg, 0.2 mmol) and CH<sub>3</sub>I (0.125 mL, 2.0 mmol) in CH<sub>3</sub>CN (4.0 mL) were stirred under reflux for 24 h. After cooling to room temperature, volatiles were removed under reduced pressure and the obtained solid compound **18** was used for the next step without any further purification. The imidazolium salt was obtained in almost quantitative yield at this step.

Under argon atmosphere, to a flame-dried Schlenk tube equipped with a septum and stirring bar were added NHC precursor **18** (57 mg, 0.1 mmol), NaOAc (17 mg, 0.2 mmol) and [(Me<sub>2</sub>S)AuCl] (30 mg, 0.1 mmol) followed by the addition of dry CH<sub>3</sub>CN (5.0 mL) as the solvent. After refluxing at 85 °C for about 12 h, the reaction mixture was cooled to room temperature and filtered through Celite. Then volatiles were removed under reduced pressure and the residue was purified by a silica gel flash column chromatography (eluent: petroleum ether/EtOAc, 2.5/1) to give complex **2a** as a white solid in 54% yield. Single crystals of **2a** suitable for an X-ray diffraction study were grown from the solution of **2a** in mixed ethyl ether/CH<sub>2</sub>Cl<sub>2</sub> (1:1) (Scheme S2).

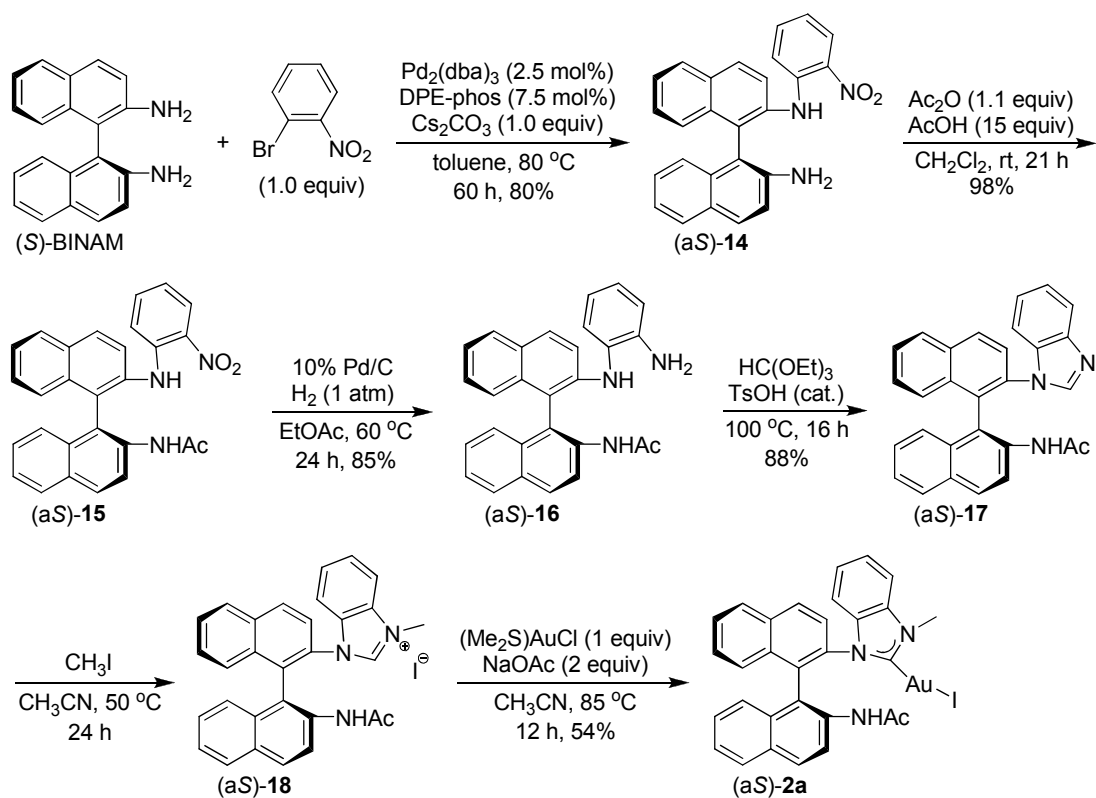

**Scheme S2**

### Compound (aS)-14

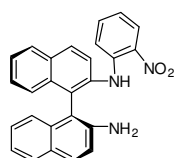

It is a known compound.<sup>[2]</sup> Red solid.  $^1\text{H}$  NMR (300 MHz,  $\text{CDCl}_3$ , TMS)  $\delta$  3.68 (s, 2H), 6.66-6.71 (m, 1H), 6.98 (d,  $J = 8.1$  Hz, 1H), 7.12-7.23 (m, 3H), 7.28-7.35 (m, 3H), 7.39-7.48 (m, 2H), 7.75-7.82 (m, 3H), 7.93 (d,  $J = 7.8$  Hz, 1H), 7.97-8.02 (m, 2H), 9.29 (s, 1H).

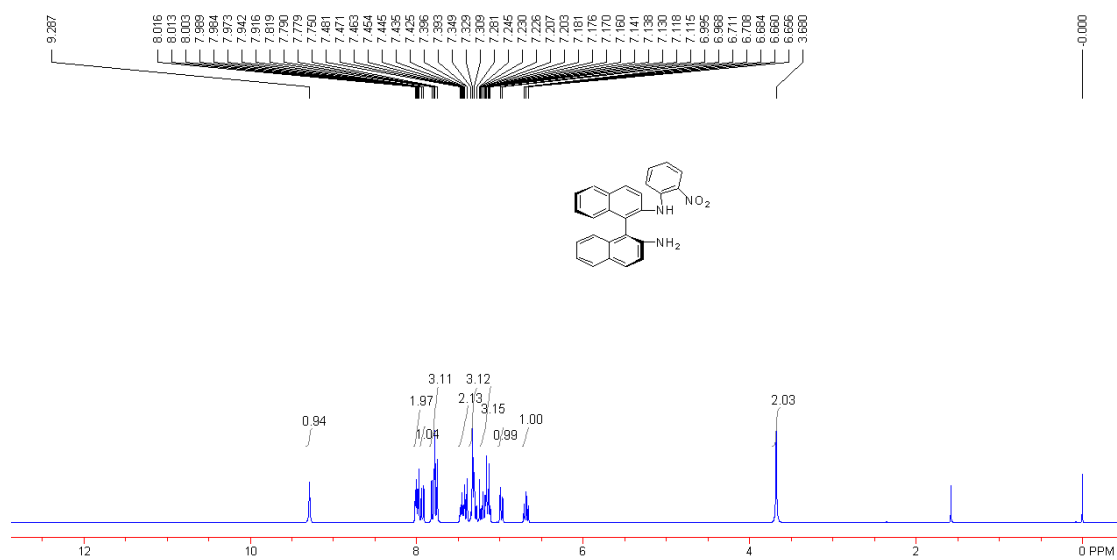

### Compound (aS)-15

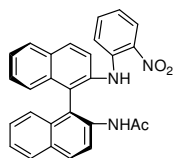

It is a known compound.<sup>[2]</sup> Red solid. <sup>1</sup>H NMR (300 MHz, CDCl<sub>3</sub>, TMS)  $\delta$  1.74 (s, 3H), 6.71-6.77 (m, 1H), 6.88 (s, 1H), 7.09 (d,  $J$  = 8.7 Hz, 1H), 7.16-7.49 (m, 7H), 7.77 (d,  $J$  = 8.7 Hz, 1H), 7.89-8.05 (m, 5H), 8.53 (d,  $J$  = 8.4 Hz, 1H), 8.93 (s, 1H).

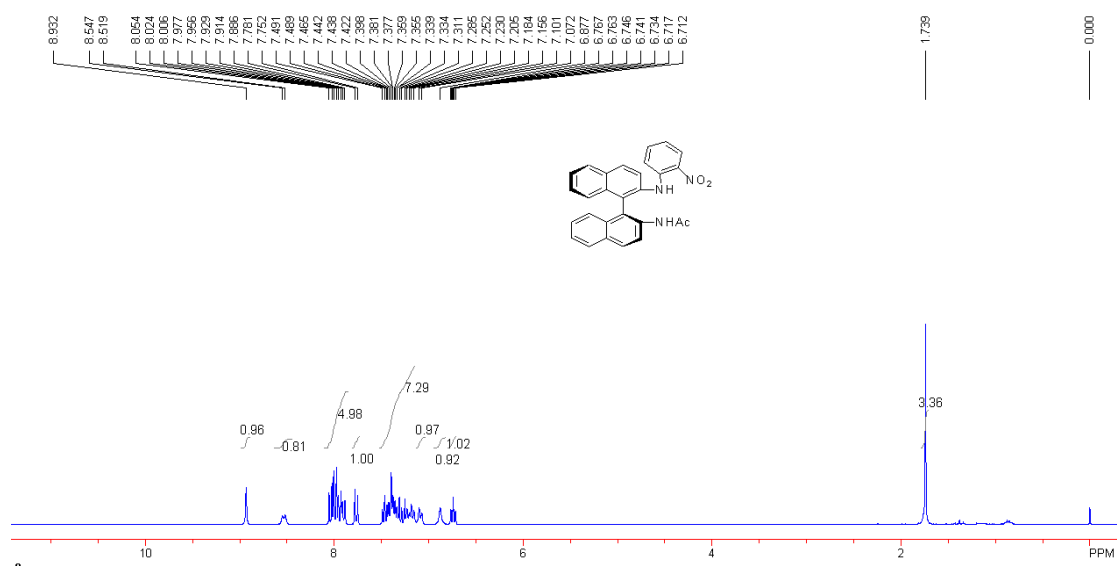

### Compound (aS)-16

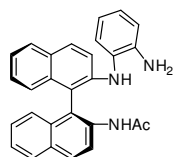

It is a known compound.<sup>[2]</sup> White solid. <sup>1</sup>H NMR (300 MHz, CDCl<sub>3</sub>, TMS)  $\delta$  1.89 (s, 3H), 3.65 (s, 2H), 4.89 (s, 1H), 6.66-6.72 (m, 2H), 6.95-7.01 (m, 3H), 7.08 (s, 1H), 7.17-7.34 (m, 5H), 7.42-7.47 (m, 1H), 7.81-7.87 (m, 2H), 7.93 (d,  $J$  = 8.1 Hz, 1H), 8.03 (d,  $J$  = 9.0 Hz, 1H), 8.56 (d,  $J$  = 9.3 Hz, 1H).

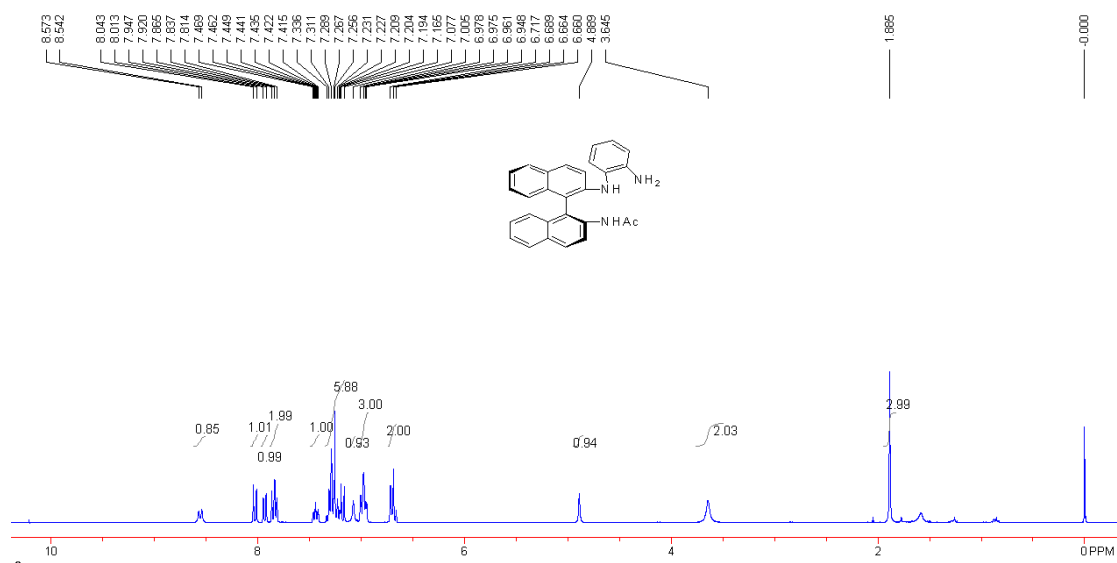

### Compound (aS)-17

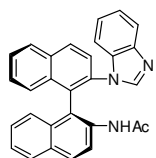

It is a known compound.<sup>[2]</sup> White solid; m.p. 228-230 °C.  $[\alpha]_D^{20} = -218$  (c 0.25,  $\text{CHCl}_3$ ). IR (direct irradiation)  $\nu$  3223, 3052, 2929, 1656, 1597, 1500, 1488, 1453, 1364, 1275, 1232, 865, 812, 742, 715  $\text{cm}^{-1}$ .  $^1\text{H}$  NMR (400 MHz,  $\text{CDCl}_3$ , TMS)  $\delta$  1.64 (s, 3H), 6.66 (s, 1H), 7.09-7.11 (m, 1H), 7.24-7.30 (m, 5H), 7.37-7.43 (m, 3H), 7.62-7.68 (m, 2H), 7.79 (d,  $J = 8.8$  Hz, 1H), 7.83-7.88 (m, 2H), 8.08 (d,  $J = 8.0$  Hz, 1H), 8.22-8.28 (m, 2H).

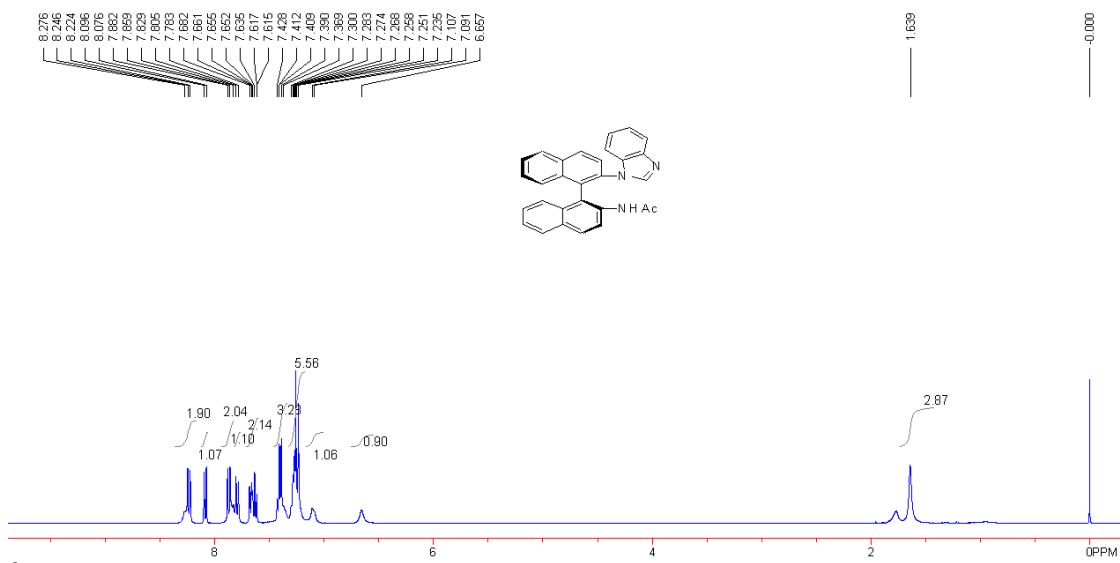

### Complex (aS)-2a

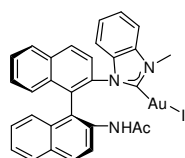

White solid; m.p. 259.5-260.6 °C (dec.).  $[\alpha]_D^{20} = -52$  (*c* 0.25, CHCl<sub>3</sub>). IR (direct irradiation)  $\nu$  3324, 1702, 1507, 1482, 1465, 1391, 1354, 1306, 1245, 1150, 1133, 1013, 863, 828, 808, 763, 750, 693 cm<sup>-1</sup>. <sup>1</sup>H NMR (400 MHz, CDCl<sub>3</sub>, TMS)  $\delta$  2.07 (s, 3H), 3.94 (s, 3H), 6.82 (t, *J* = 8.0 Hz, 1H), 6.89 (d, *J* = 8.4 Hz, 1H), 7.12-7.22 (m, 5H), 7.25-7.29 (m, 1H), 7.39-7.46 (m, 2H), 7.64-7.69 (m, 3H), 7.80 (d, *J* = 8.4 Hz, 1H), 8.00 (d, *J* = 8.8 Hz, 1H), 8.11 (d, *J* = 8.4 Hz, 1H), 8.25 (d, *J* = 9.2 Hz, 1H). LRMS (ESI) *m/e* 638.1 [M<sup>+</sup>-I]; HRMS (ESI) calcd for [C<sub>30</sub>H<sub>23</sub>N<sub>3</sub>IAu-I] requires 638.1507, found 638.1484 [M<sup>+</sup>-I].

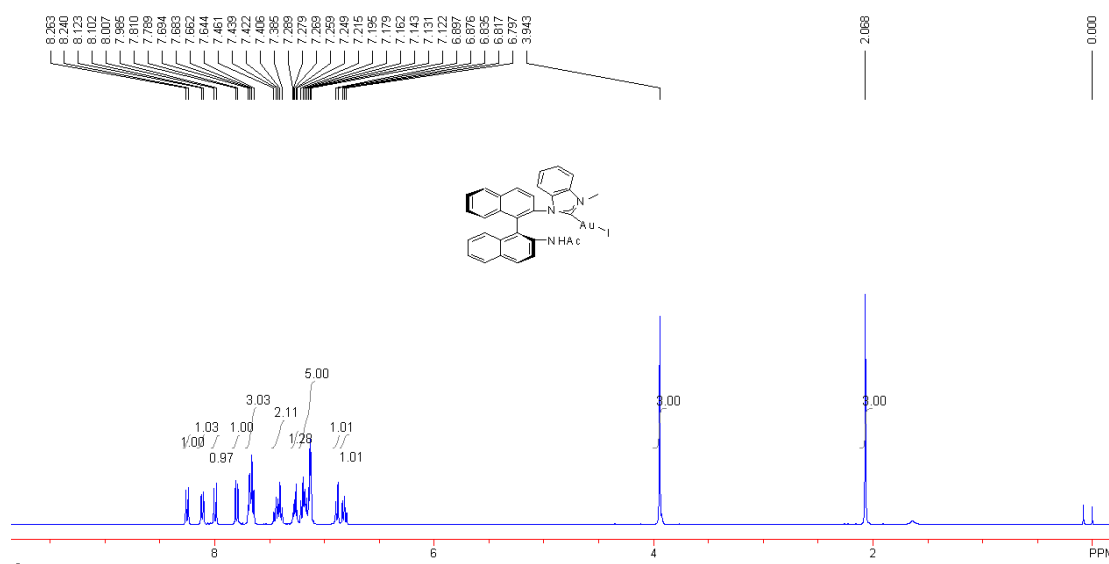

Compound **17** (86 mg, 0.2 mmol) and benzylbromide (0.24 mL, 2 mmol) were refluxed in 1,4-dioxane (3 mL) until completely consuming **17** by TLC monitoring. When lots of white solids were precipitated in the reaction system, the resulting suspension was cooled to room temperature and filtered through Celite to obtain solids, which were then washed with *n*-hexane for three times to give mono-benzimidazolium salt **19** in almost quantitative yield without any further purification.

Under argon atmosphere, to a flame-dried Schlenk tube equipped with a septum and stirring bar were added NHC precursor **19** (60 mg, 0.1 mmol), NaOAc (17 mg, 0.2 mmol), <sup>t</sup>Bu<sub>4</sub>NI (74 mg, 0.2 mmol) and [(Me<sub>2</sub>S)AuCl] (30 mg, 0.1 mmol) followed by the addition of dry CH<sub>3</sub>CN (5 mL) as the solvent. After refluxing at 85 °C for about 8 h, the reaction mixture

was cooled to room temperature and filtered through Celite. Then volatiles were removed under reduced pressure and the residue was purified by a silica gel flash column chromatography (eluent: petroleum ether/EtOAc, 3/1) to give complex **2b** as a white solid in 42% yield (Scheme S3).

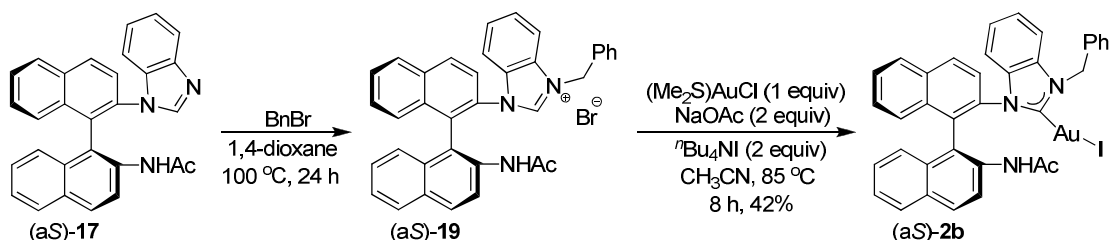

**Scheme S3**

### Complex (aS)-2b

White solid; m.p. 291.9-293.0 °C (dec.).  $[\alpha]_D^{20} = -31$  (*c* 0.25, CHCl<sub>3</sub>). IR (direct irradiation)  $\nu$  3428, 2923, 2853, 1701, 1618, 1595, 1568, 1495, 1423, 1402, 1346, 1306, 1278, 1252, 1223, 1192, 1013, 839, 823, 755, 731, 697 cm<sup>-1</sup>. <sup>1</sup>H NMR (400 MHz, CDCl<sub>3</sub>, TMS)  $\delta$  1.99 (s, 3H), 5.37 (d, *J* = 15.6 Hz, 1H), 5.84 (d, *J* = 15.6 Hz, 1H), 6.82-6.84 (m, 2H), 6.89 (t, *J* = 7.2 Hz, 1H), 6.95-7.09 (m, 5H), 7.19 (t, *J* = 7.2 Hz, 1H), 7.28-7.29 (m, 4H), 7.48-7.49 (m, 2H), 7.66 (d, *J* = 8.4 Hz, 1H), 7.68-7.72 (m, 1H), 7.74 (d, *J* = 8.8 Hz, 1H), 7.85 (d, *J* = 8.8 Hz, 1H), 8.10 (d, *J* = 8.8 Hz, 1H), 8.13 (d, *J* = 8.4 Hz, 1H), 8.29 (d, *J* = 8.4 Hz, 1H). LRMS (ESI) *m/e* 714.2 [M<sup>+</sup>-I]; HRMS (ESI) calcd for [C<sub>36</sub>H<sub>27</sub>N<sub>3</sub>IOAu-I] requires 714.1820, found 714.1821 [M<sup>+</sup>-I].

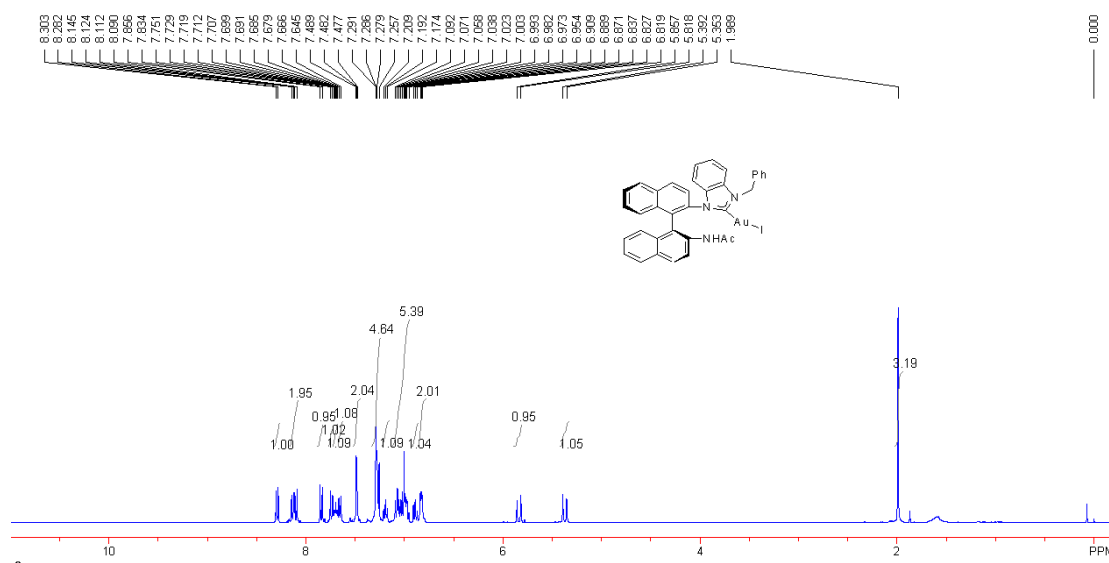

### (3) General Procedure for the Synthesis of Gold(I) Complex (aS)-3

To a mixture of **14** (405 mg, 1.0 mmol) and DMAP (122 mg, 1.0 mmol) in dry CH<sub>3</sub>CN (10 mL) was dropwise added PhC(O)Cl (174  $\mu$ L, 1.5 mmol) and the resulting system was stirred at room temperature for 17 h. The reaction was quenched via addition of water (20 mL) and then extracted with ethyl acetate for three times. The combined organic phases were dried over anhydrous Na<sub>2</sub>SO<sub>4</sub>, concentrated under reduced pressure, and then purified by a silica gel flash column chromatography (eluent: petroleum ether/EtOAc: 10/1) to give **20** as a red solid in 98% yield.

A mixture of **20** (484 mg, 0.95 mmol) and 10% Pd/C (100 mg) in EtOAc (40 mL) was stirred under H<sub>2</sub> atmosphere (1.0 atm) at 60 °C for 21 h. After cooling to room temperature, the suspension was filtered through Celite to remove Pd/C. Then volatiles were removed under reduced pressure and the residue was purified by a silica gel flash column chromatography (eluent: petroleum ether/EtOAc, 8/1) to give **21** as a white solid in 74% yield.

In the presence of a catalytic amount of TsOH (15 mg), compound **21** (331 mg, 0.69 mmol) and triethyl orthoformate (7.0 mL) were heated at 100 °C for 34 h. After removing triethyl orthoformate under reduced pressure, the residue was purified by a silica gel flash column chromatography (eluent: petroleum ether/EtOAc, 2/1) to give **22** as a white solid in 90% yield.

Compound **22** (147 mg, 0.3 mmol) and CH<sub>3</sub>I (0.2 mL, 3.0 mmol) in CH<sub>3</sub>CN (4.0 mL)

were stirred under reflux for 22 h. After cooling to room temperature, volatiles were removed under reduced pressure and the obtained solid compound **23** was used for the next step without any further purification.

Under argon atmosphere, to a flame-dried Schlenk tube equipped with a septum and stirring bar were added NHC precursor **23** (126 mg, 0.2 mmol), NaOAc (33 mg, 0.4 mmol) and [(Me<sub>2</sub>S)AuCl] (60 mg, 0.2 mmol) followed by the addition of dry CH<sub>3</sub>CN (10 mL) as the solvent. After refluxing at 85 °C for 22 h, the reaction mixture was cooled to room temperature and filtered through Celite. Then volatiles were removed under reduced pressure and the residue was purified by a silica gel flash column chromatography (eluent: petroleum ether/EtOAc, 4/1) to give complex **3** as a white solid in 37% yield (Scheme S4).

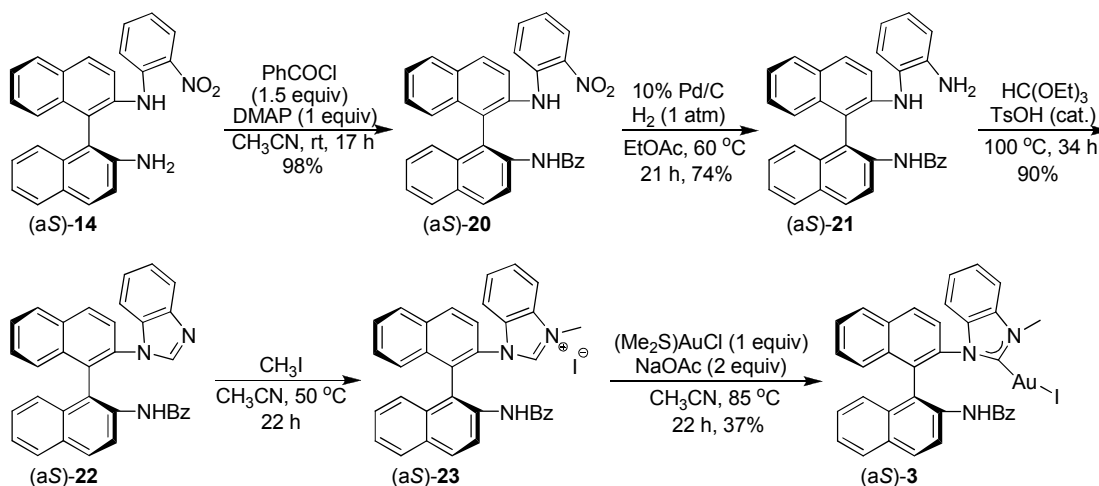

**Scheme S4**

#### Compound (aS)-**20**

Red solid; m.p. 108.4-109.9 °C.  $[\alpha]_D^{20} = +11$  (*c* 0.25, CHCl<sub>3</sub>). IR (direct irradiation)  $\nu$  3408, 3323, 3056, 2925, 1675, 1610, 1593, 1574, 1493, 1425, 1338, 1248, 1146, 1074, 1040, 1024, 863, 814, 738, 705 cm<sup>-1</sup>. <sup>1</sup>H NMR (400 MHz, CDCl<sub>3</sub>, TMS)  $\delta$  6.67-6.71 (m, 1H), 7.14-7.23 (m, 6H), 7.27-7.37 (m, 5H), 7.41-7.50 (m, 2H), 7.64 (s, 1H), 7.78 (d, *J* = 9.2 Hz, 1H), 7.93-7.99 (m, 3H), 8.06 (d, *J* = 8.8 Hz, 2H), 8.78 (d, *J* = 8.8 Hz, 1H), 9.00 (s, 1H); <sup>13</sup>C NMR (75 MHz, CDCl<sub>3</sub>, TMS)  $\delta$  115.7, 118.3, 120.46, 120.5, 121.5, 123.3, 124.4, 125.0, 125.3, 125.8, 126.5, 127.2, 127.8, 128.36, 128.39, 128.4, 129.7, 129.9, 130.1, 131.0, 131.1, 131.5, 132.3, 133.1, 134.2, 134.4, 134.5, 135.1, 136.3,

140.6, 165.0. LRMS (ESI)  $m/e$  510.2  $[M^+ + H]$ ; HRMS (ESI) calcd for  $[C_{33}H_{23}N_3O_3 + H]$  requires 510.1818, found 510.1824  $[M^+ + H]$ .

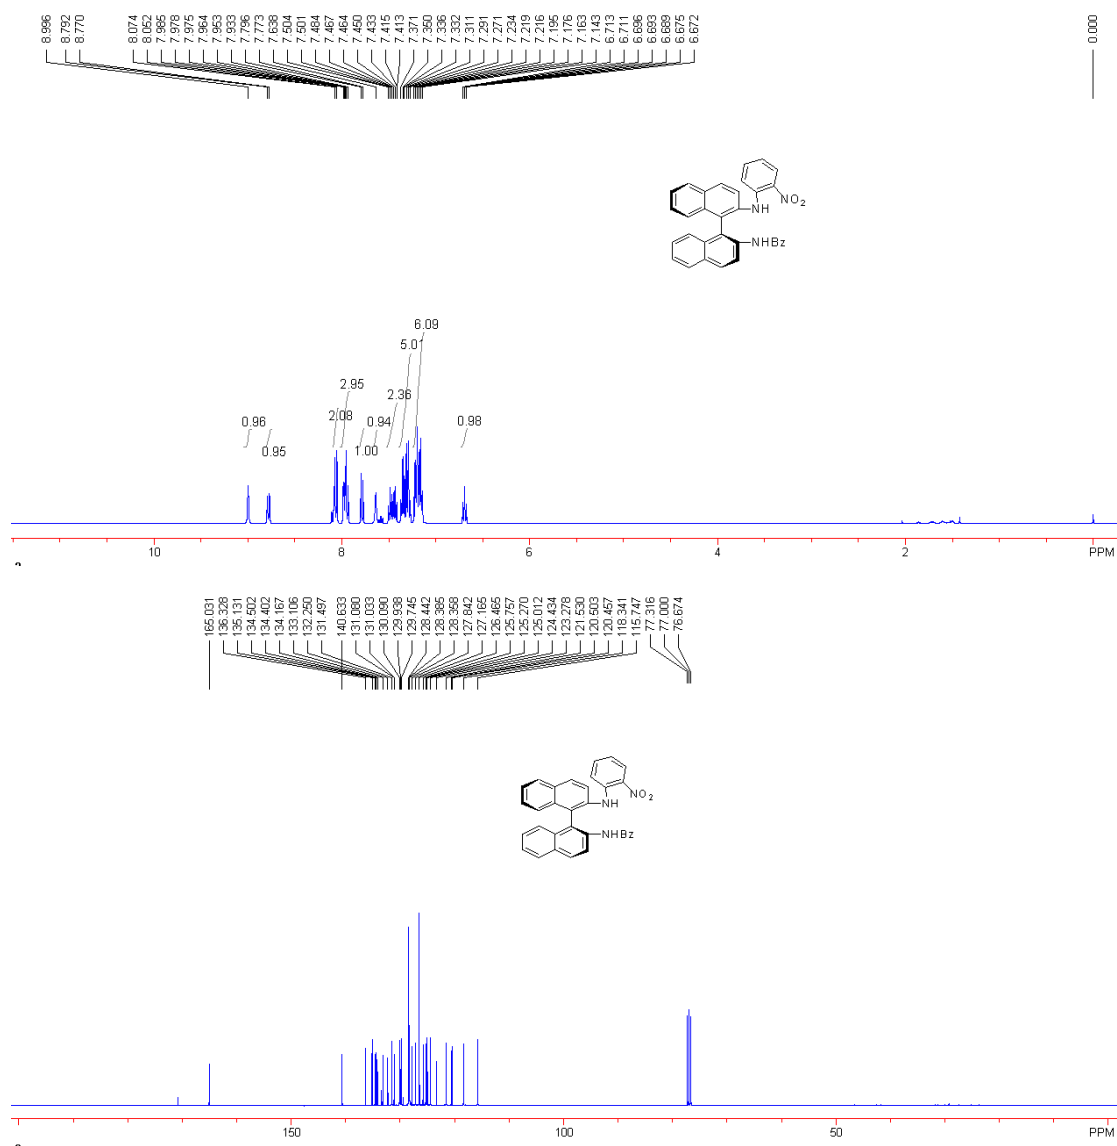

### Compound (aS)-21

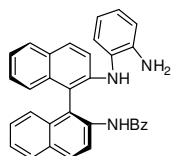

White solid; m.p. 111.1-112.8 °C.  $[\alpha]_D^{20} = -16$  ( $c$  0.25,  $CHCl_3$ ). IR (direct irradiation)  $\nu$  3461, 3379, 3054, 2953, 2923, 2853, 1672, 1616, 1594, 1500, 1486, 1455, 1424, 1331, 1282, 1147, 1024, 816, 744, 705  $cm^{-1}$ .  $^1H$  NMR (400 MHz,  $CDCl_3$ , TMS)  $\delta$  3.41 (br, 2H), 4.95 (s, 1H), 6.53-6.57 (m, 2H), 6.86-6.89 (m, 2H), 7.06 (d,  $J = 8.0$  Hz, 1H), 7.13 (d,  $J = 9.2$  Hz, 1H), 7.16-7.34 (m, 8H), 7.38-7.44 (m, 2H), 7.80-7.84 (m, 2H), 7.93 (d,  $J = 8.0$  Hz, 1H), 7.96 (s, 1H), 8.06 (d,  $J = 8.8$  Hz, 1H), 8.85 (d,  $J = 9.2$  Hz,

$^1\text{H}$ );  $^{13}\text{C}$  NMR (75 MHz,  $\text{CDCl}_3$ , TMS)  $\delta$  111.4, 115.7, 116.0, 118.6, 120.7, 120.9, 123.0, 123.5, 125.0, 125.3, 126.6, 126.67, 126.72, 126.74, 127.1, 127.5, 128.29, 128.32, 128.5, 128.6, 129.6, 130.3, 131.4, 131.6, 132.5, 133.3, 134.4, 135.4, 142.7, 143.1, 165.4. LRMS (ESI)  $m/e$  480.2  $[\text{M}^+\text{+H}]$ ; HRMS (ESI) calcd for  $[\text{C}_{33}\text{H}_{25}\text{N}_3\text{O+H}]$  requires 480.2076, found 480.2080  $[\text{M}^+\text{+H}]$ .

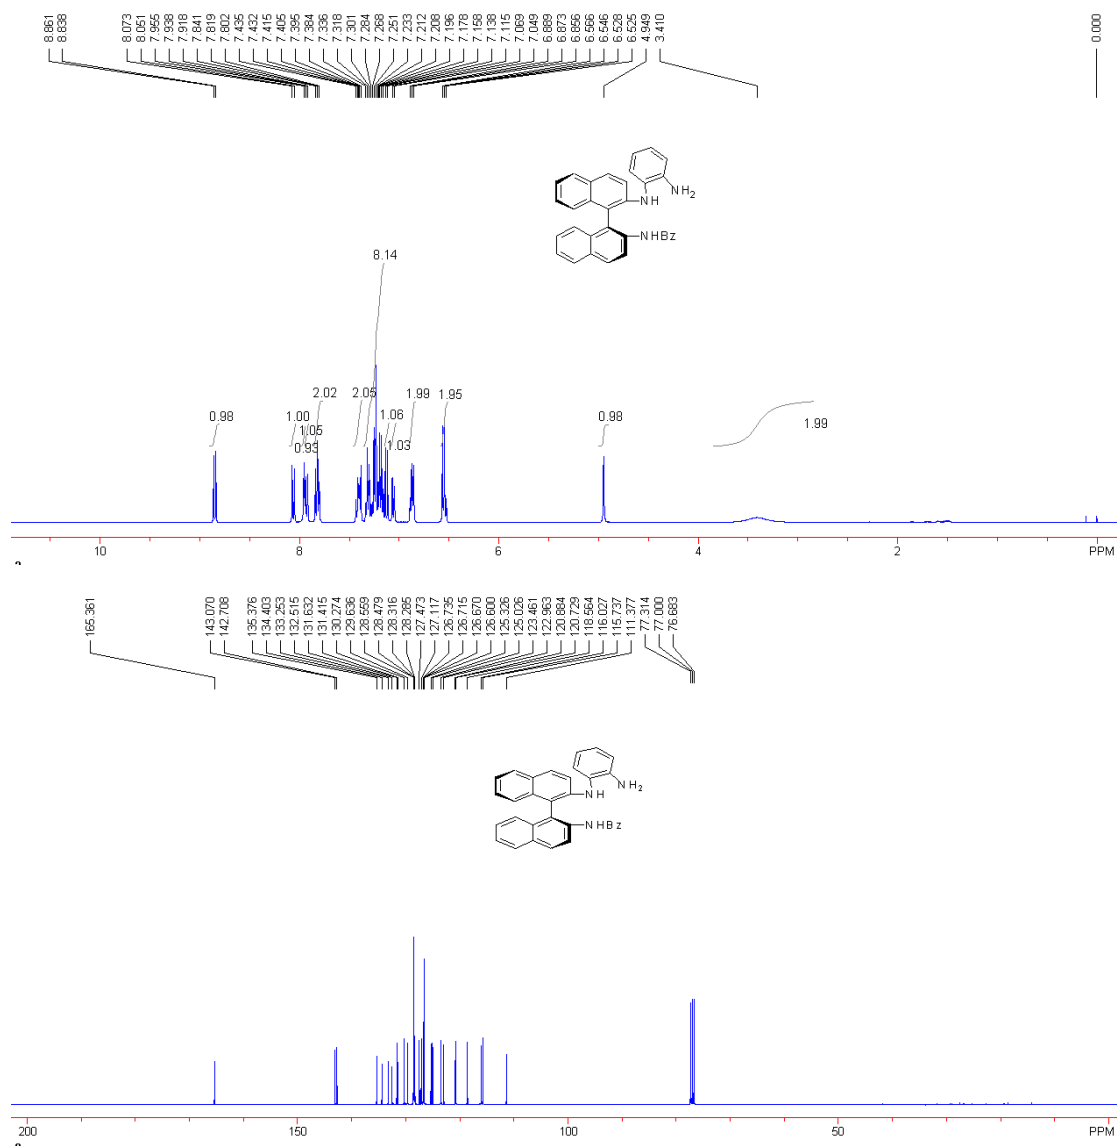

### Compound (aS)-22

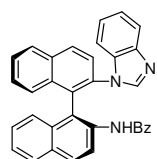

White solid; m.p. 168.2-170.2  $^{\circ}\text{C}$ .  $[\alpha]_D^{20} = -91$  ( $c$  0.25,  $\text{CHCl}_3$ ). IR (direct irradiation)  $\nu$  3419, 3055, 2954, 2923, 1668, 1596, 1486, 1454, 1426, 1378, 1281, 1235, 1145, 1025, 890, 817, 796, 741, 706  $\text{cm}^{-1}$ .  $^1\text{H}$  NMR (400 MHz,

CDCl<sub>3</sub>, TMS)  $\delta$  7.06-7.12 (m, 3H), 7.15-7.24 (m, 6H), 7.34-7.45 (m, 6H), 7.63 (t,  $J$  = 7.2 Hz, 2H), 7.78 (d,  $J$  = 9.2 Hz, 1H), 7.84 (d,  $J$  = 8.0 Hz, 1H), 7.93 (d,  $J$  = 9.2 Hz, 1H), 8.09 (d,  $J$  = 8.4 Hz, 1H), 8.24 (d,  $J$  = 8.8 Hz, 1H), 8.45 (d,  $J$  = 8.8 Hz, 1H); <sup>13</sup>C NMR (75 MHz, CDCl<sub>3</sub>, TMS)  $\delta$  109.5, 120.4, 120.6, 120.8, 122.7, 123.5, 124.4, 124.8, 125.3, 126.4, 126.7, 127.2, 127.7, 128.4, 128.5, 128.6, 128.8, 130.0, 130.8, 131.0, 131.7, 133.0, 133.2, 133.6, 134.3, 134.5, 165.0. LRMS (ESI)  $m/e$  490.2 [M<sup>+</sup>+H]; HRMS (ESI) calcd for [C<sub>34</sub>H<sub>23</sub>N<sub>3</sub>O+H] requires 490.1919, found 490.1921 [M<sup>+</sup>+H].

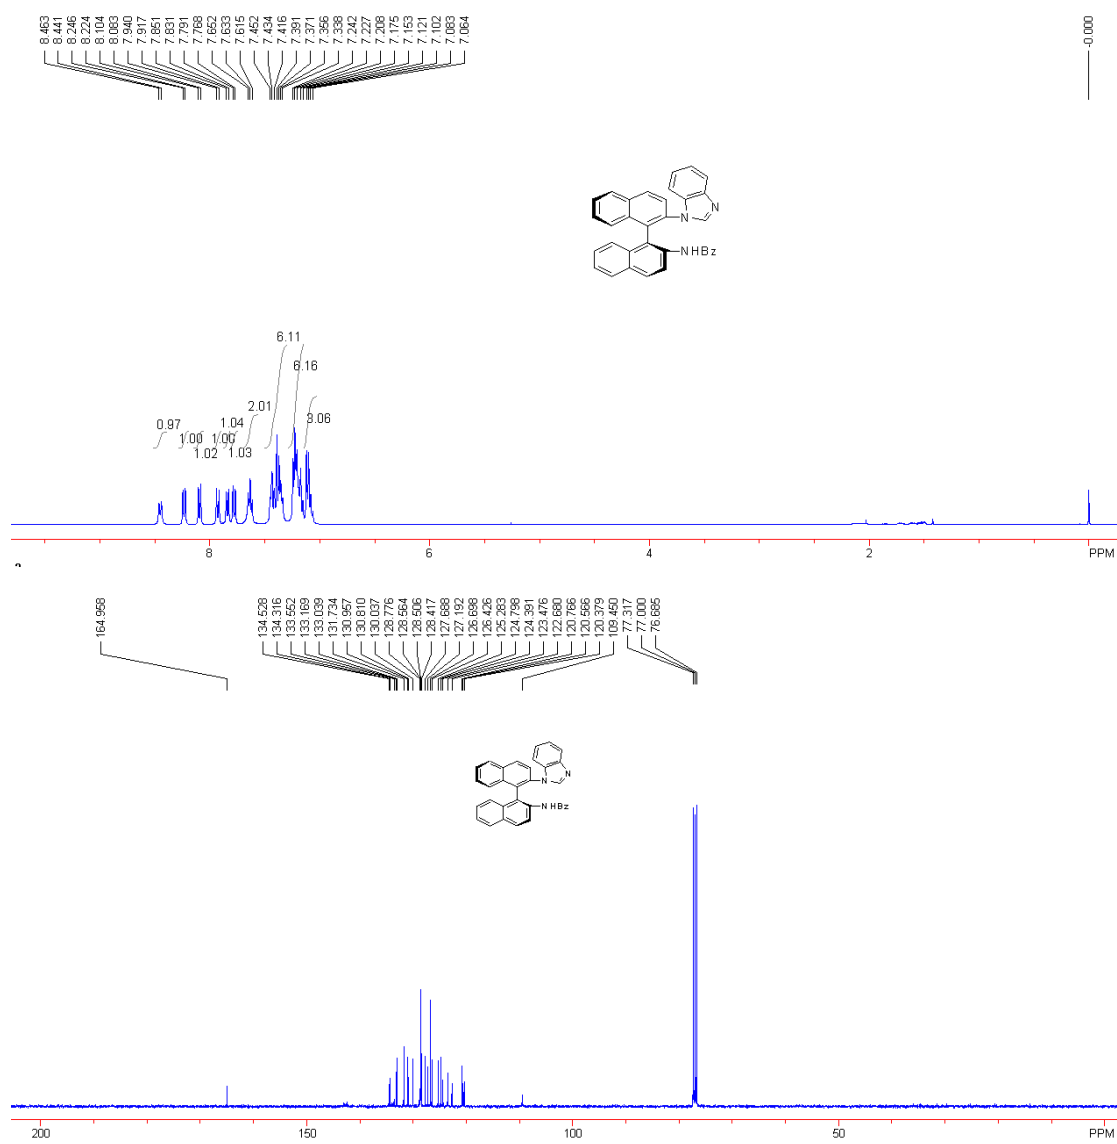

### Complex (aS)-3

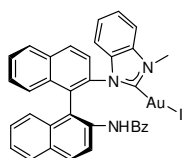

White solid; m.p. 141.5-142.9 °C (dec.). [ $\alpha$ ]<sub>D</sub><sup>20</sup> = -149 ( $c$  0.25, CHCl<sub>3</sub>). IR

(direct irradiation)  $\nu$  3419, 3057, 2924, 2852, 1682, 1596, 1501, 1487, 1466, 1427, 1391, 1346, 1277, 1238, 1099, 1024, 860, 820, 744, 706  $\text{cm}^{-1}$ .  $^1\text{H}$  NMR (400 MHz,  $\text{CDCl}_3$ , TMS)  $\delta$  3.77 (s, 3H), 6.79 (d,  $J$  = 8.4 Hz, 1H), 7.02 (t,  $J$  = 7.2 Hz, 1H), 7.14 (d,  $J$  = 8.0 Hz, 1H), 7.20-7.30 (m, 5H), 7.36 (t,  $J$  = 7.2 Hz, 1H), 7.43-7.47 (m, 2H), 7.56-7.66 (m, 3H), 7.72 (d,  $J$  = 9.2 Hz, 2H), 7.76-7.81 (m, 3H), 8.21 (d,  $J$  = 8.4 Hz, 1H), 8.28 (d,  $J$  = 8.8 Hz, 1H), 8.40 (d,  $J$  = 9.2 Hz, 1H). LRMS (ESI)  $m/e$  700.2 [ $\text{M}^+ - \text{I}$ ]; HRMS (ESI) calcd for [ $\text{C}_{35}\text{H}_{25}\text{N}_3\text{IOAu} - \text{I}$ ] requires 700.1663, found 700.1661 [ $\text{M}^+ - \text{I}$ ].

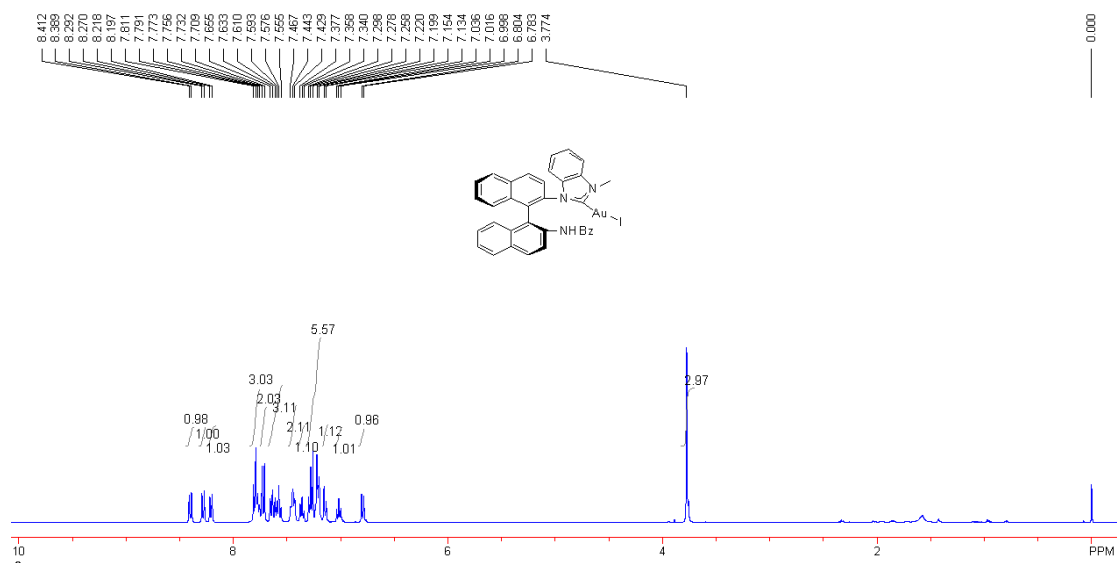

#### (4) General Procedure for the Synthesis of Gold(I) Complex (aS)-4

Acetyl compound **17** (2.14 g, 5 mmol) was refluxed in 4.0 M HCl (50 mL) and ethanol (80 mL) for 22 h. The reaction system was cooled to room temperature and neutralized to pH > 7 with saturated aqueous NaOH solution, which was followed by the extraction with  $\text{CH}_2\text{Cl}_2$  and dried over anhydrous  $\text{Na}_2\text{SO}_4$ . The crude product was purified by a silica gel flash column chromatography (eluent: petroleum ether/EtOAc, 1/2) to give benzimidazole-primary amine **24** as a white solid in 99% yield.

A mixture of **24** (385 mg, 1.0 mmol),  $\text{Boc}_2\text{O}$  (240 mg, 1.1 mmol) and DMAP (122 mg, 1.0 mmol) in dry  $\text{CH}_3\text{CN}$  (10 mL) was stirred at 50  $^\circ\text{C}$  for 40 h. After removing volatiles under reduced pressure, the crude product was purified by a silica gel flash column chromatography (eluent: petroleum ether/EtOAc, 3/1) to provide **25** as a white solid in 60%

yield.

Compound **25** (291 mg, 0.6 mmol) and CH<sub>3</sub>I (0.75 mL, 12 mmol) in CH<sub>3</sub>CN (12 mL) were stirred under reflux for 60 h until completely consuming **25**. After cooling to room temperature, volatiles were removed under reduced pressure and the obtained solid compound **26** was used for the next step without further purification.

Under argon atmosphere, to a flame-dried Schlenk tube equipped with a septum and stirring bar were added NHC precursor **26** (125 mg, 0.2 mmol), NaOAc (33 mg, 0.4 mmol) and [(Me<sub>2</sub>S)AuCl] (60 mg, 0.2 mmol) followed by the addition of dry CH<sub>3</sub>CN (10 mL) as the solvent. After refluxing at 85 °C for 24 h, the reaction mixture was cooled to room temperature and filtered through Celite. Then volatiles were removed under reduced pressure and the residue was purified by a silica gel flash column chromatography (eluent: petroleum ether/EtOAc, 6/1) to give complex **4** as a white solid in 30% yield (Scheme S5).

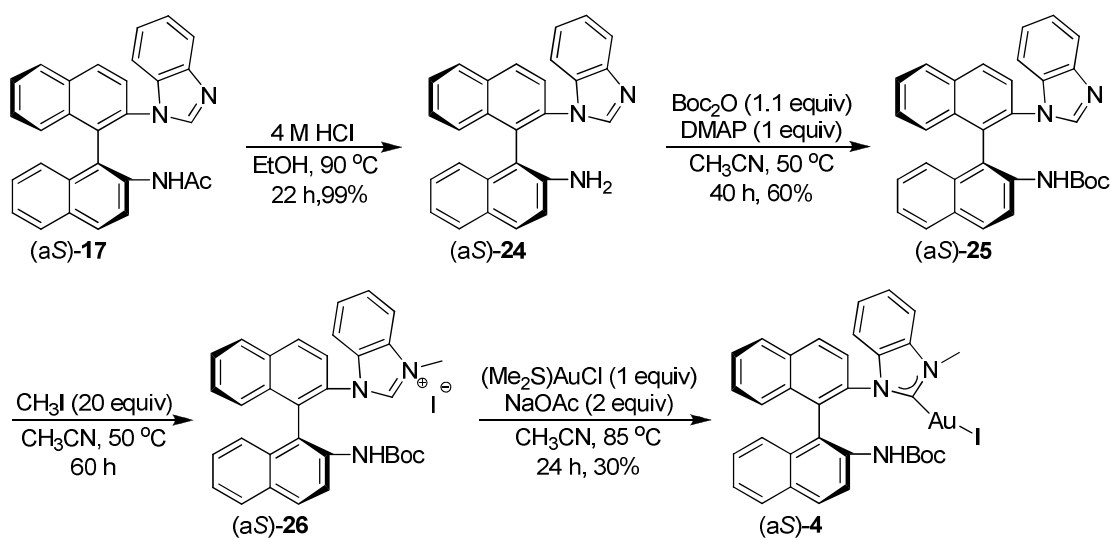

**Scheme S5**

Compound (aS)-**24**<sup>[2b]</sup>

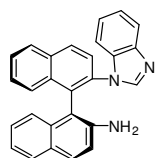

White solid; m.p. 134-136 °C.  $[\alpha]_D^{20} = -27$  (c 0.25, CHCl<sub>3</sub>). IR (direct irradiation)  $\nu$  3461, 3370, 3318, 3196, 2956, 2925, 2853, 1619, 1488, 1453, 1382, 1285, 1235, 1146, 816, 740, 623 cm<sup>-1</sup>. <sup>1</sup>H NMR (400 MHz, CDCl<sub>3</sub>, TMS)  $\delta$  3.55 (s, 2H), 6.89-6.93 (m, 2H), 7.04-7.12 (m, 2H), 7.17-7.23 (m, 2H), 7.38-7.45 (m, 3H), 7.58-7.68 (m, 5H), 7.77 (d, *J* = 8.8 Hz, 1H), 8.05 (d, *J* = 8.4 Hz, 1H), 8.17 (d, *J* = 8.8 Hz, 1H); <sup>13</sup>C NMR

(75 MHz, CDCl<sub>3</sub>, TMS)  $\delta$  109.7, 111.4, 117.7, 120.0, 122.09, 122.14, 123.0, 124.4, 126.4, 126.6, 127.1, 127.6, 128.1, 128.3, 129.8, 129.9, 130.3, 133.1, 133.3, 133.5, 133.7, 134.2, 142.5, 142.9, 143.0. LRMS (ESI)  $m/e$  386.2 [M<sup>+</sup>+H]; HRMS (ESI) calcd for [C<sub>27</sub>H<sub>19</sub>N<sub>3</sub>+H] requires 386.1657, found 386.1660 [M<sup>+</sup>+H].

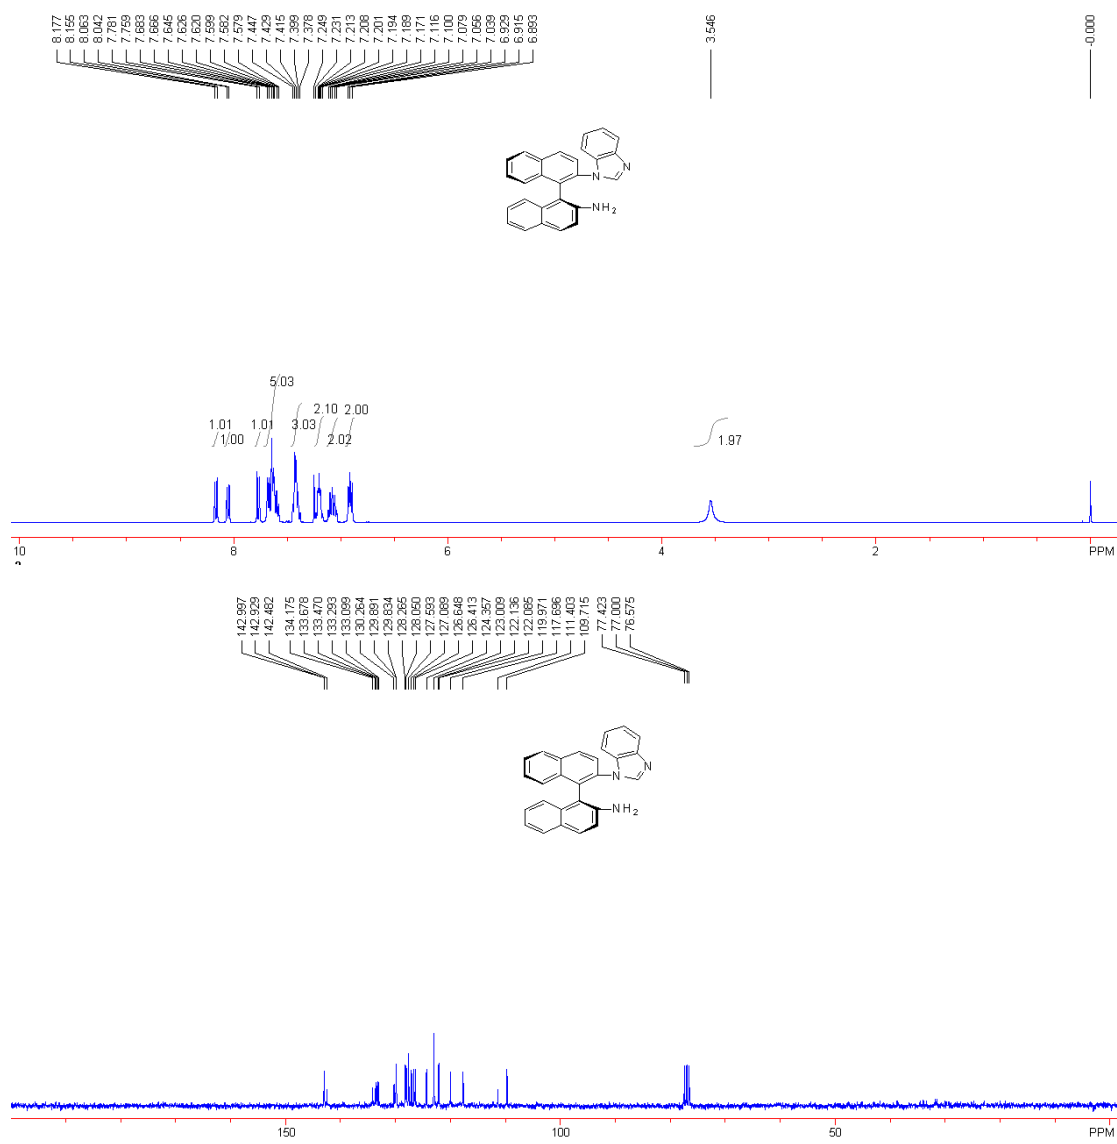

### Compound (aS)-25

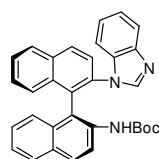

White solid; m.p. 143.8-145.8 °C.  $[\alpha]_D^{20} = -119$  ( $c$  0.25, CHCl<sub>3</sub>). IR (direct irradiation)  $\nu$  3423, 3054, 2964, 2925, 1722, 1598, 1489, 1453, 1427, 1366, 1284, 1266, 1232, 1153, 1085, 1065, 1034, 888, 867, 820, 741 cm<sup>-1</sup>. <sup>1</sup>H NMR (400 MHz, CDCl<sub>3</sub>, TMS)  $\delta$  1.26 (s, 9H), 5.99 (s, 1H), 7.07 (d,  $J$  = 8.4 Hz, 1H), 7.20-7.34 (m,

6H), 7.41 (t,  $J = 8.0$  Hz, 2H), 7.61-7.67 (m, 2H), 7.77 (d,  $J = 8.8$  Hz, 1H), 7.80 (d,  $J = 8.4$  Hz, 1H), 7.84 (d,  $J = 8.8$  Hz, 1H), 8.09 (d,  $J = 8.4$  Hz, 1H), 8.22-8.24 (m, 2H);  $^{13}\text{C}$  NMR (100 MHz,  $\text{CDCl}_3$ , TMS)  $\delta$  27.9, 80.7, 109.7, 119.3, 120.2, 122.6, 123.6, 124.4, 124.5, 124.6, 126.6, 127.1, 127.5, 128.0, 128.4, 128.5, 129.1, 129.8, 130.0, 130.8, 133.1, 133.3, 134.0, 134.9, 142.2, 142.6, 151.9. LRMS (ESI)  $m/e$  486.2 [ $\text{M}^+ + \text{H}$ ]; HRMS (ESI) calcd for  $[\text{C}_{32}\text{H}_{27}\text{N}_3\text{O}_2 + \text{H}]$  requires 486.2182, found 486.2180 [ $\text{M}^+ + \text{H}$ ].

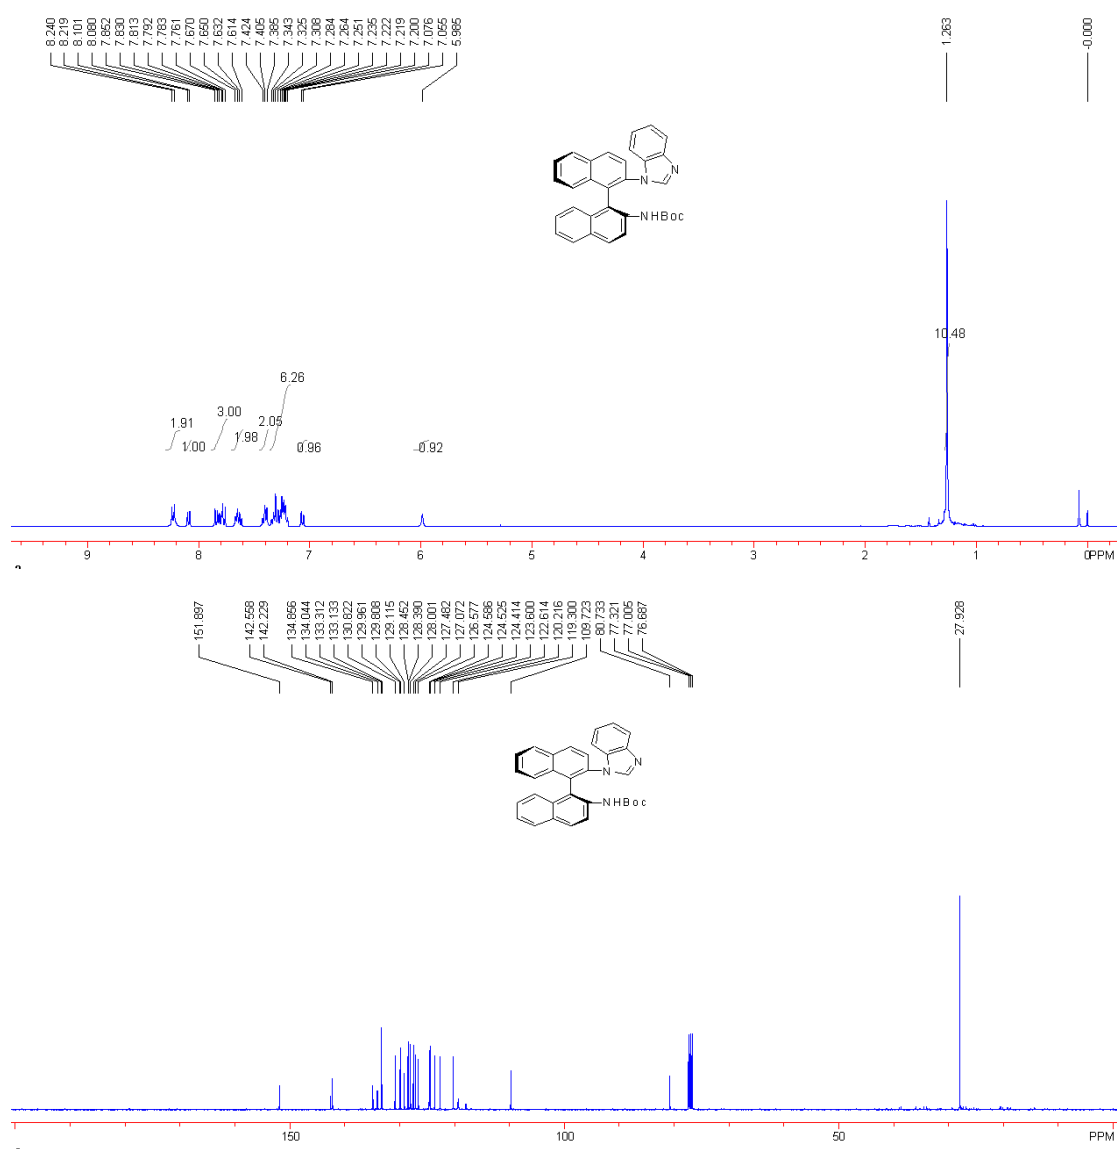

#### Complex (aS)-4

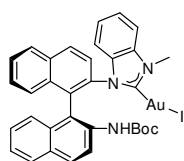

White solid; m.p. 153.4-154.5 °C (dec.).  $[\alpha]_{\text{D}}^{20} = -9.0$  ( $c$  0.25,  $\text{CHCl}_3$ ). IR (direct irradiation)  $\nu$  3420, 2973, 2925, 1715, 1599, 1502, 1455, 1427, 1391,

1367, 1346, 1270, 1232, 1153, 1083, 1059, 871, 820, 804, 743  $\text{cm}^{-1}$ .  $^1\text{H}$  NMR (400 MHz,  $\text{CDCl}_3$ , TMS)  $\delta$  1.53 (s, 9H), 3.99 (s, 3H), 6.27 (s, 1H), 6.56-6.61 (m, 2H), 7.04-7.10 (m, 2H), 7.19-7.23 (m, 2H), 7.29-7.32 (m, 1H), 7.37-7.45 (m, 2H), 7.59 (d,  $J = 8.8$  Hz, 1H), 7.65-7.69 (m, 2H), 7.92 (d,  $J = 8.8$  Hz, 1H), 7.95 (d,  $J = 8.4$  Hz, 1H), 8.11 (d,  $J = 8.0$  Hz, 1H), 8.25 (d,  $J = 8.4$  Hz, 1H). LRMS (ESI)  $m/e$  696.2  $[\text{M}^+-\text{I}]$ ; HRMS (ESI) calcd for  $[\text{C}_{33}\text{H}_{29}\text{N}_3\text{IO}_2\text{Au}-\text{I}]$  requires 696.1925, found 696.1937  $[\text{M}^+-\text{I}]$ .

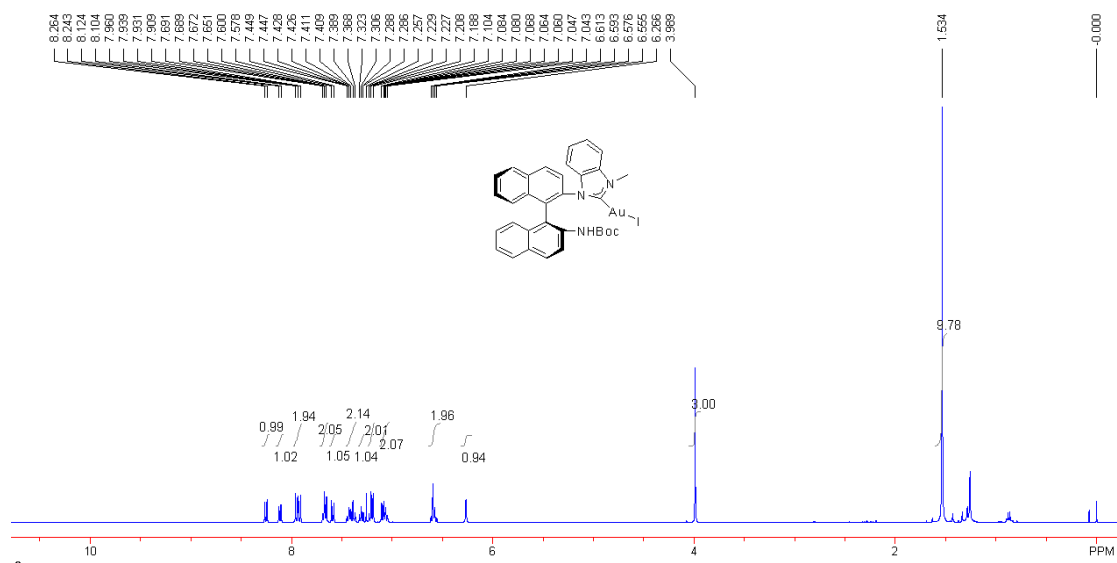

## (5) General Procedure for the Synthesis of Gold(I) Complex 5

Under argon atmosphere, compound (*S*)-**27** (646 mg, 3.0 mmol), DCC (619 mg, 3.0 mmol) and DMAP (122 mg, 1.0 mmol) in dry  $\text{CH}_2\text{Cl}_2$  (10.0 mL) was stirred at room temperature for 15 minutes followed by the addition of solution of (*aS*)-**14** (405 mg, 1.0 mmol) in  $\text{CH}_2\text{Cl}_2$  (5.0 mL), and the resulting system was further stirred at room temperature for 11 h. Then the suspension was filtered through Celite to remove white solids, and the filtrate was washed in sequence with water, saturated  $\text{KHSO}_4$ , water, saturated  $\text{NaHCO}_3$  and brine. The combined organic phases were dried over anhydrous  $\text{Na}_2\text{SO}_4$ , concentrated under reduced pressure, and then purified by a silica gel flash column chromatography (eluent: petroleum ether/EtOAc: 4/1) to give (*aS,S*)-**28** as a red solid in 98% yield.

A mixture of (*aS,S*)-**28** (603 mg, 1.0 mmol) and 10% Pd/C (100 mg) in EtOAc (40 mL) was stirred under  $\text{H}_2$  atmosphere (1.0 atm) at 60  $^\circ\text{C}$  for 12 h. After cooling to room temperature, the suspension was filtered through Celite to remove Pd/C. Then volatiles were

removed under reduced pressure and the residue was purified by a silica gel flash column chromatography (eluent: petroleum ether/EtOAc, 4/1) to give (a*S,S*)-**29** as a white solid in 93% yield.

Compound (a*S,S*)-**29** (516 mg, 0.9 mmol) and triethyl orthoformate (9.0 mL) containing a catalytic amount of TsOH (18 mg) were heated at 100 °C for 10 h. After removing triethyl orthoformate under reduced pressure, the residue was purified by a silica gel flash column chromatography (eluent: petroleum ether/EtOAc, 2/1) to give (a*S,S*)-**30** as a white solid in 83% yield.

Compound (a*S,S*)-**30** (117 mg, 0.2 mmol) and CH<sub>3</sub>I (0.125 mL, 2.0 mmol) in CH<sub>3</sub>CN (4.0 mL) were stirred under reflux for 20 h. After cooling to room temperature, volatiles were removed under reduced pressure and the obtained solid (a*S,S*)-**31** was used for the next step without any further purification.

Under argon atmosphere, to a flame-dried Schlenk tube equipped with a septum and stirring bar were added NHC precursor (a*S,S*)-**31** (72 mg, 0.1 mmol), NaOAc (17 mg, 0.2 mmol) and [(Me<sub>2</sub>S)AuCl] (30 mg, 0.1 mmol) followed by the addition of dry CH<sub>3</sub>CN (5.0 mL) as the solvent. After refluxing at 85 °C for 13 h, the reaction mixture was cooled to room temperature and filtered through Celite. Volatiles were removed under reduced pressure and the residue was purified by a silica gel flash column chromatography (eluent: petroleum ether/EtOAc, 4/1) to give complex (a*S,S*)-**5** as a white solid in 53% yield (Scheme S6).

On the other hand, NHC-Au(I) complex (a*S,R*)-**5** was prepared from compounds (*R*)-**27** and (a*S*)-**14** as a diastereoisomer according to the same procedure for the preparation of complex (a*S,S*)-**5**.

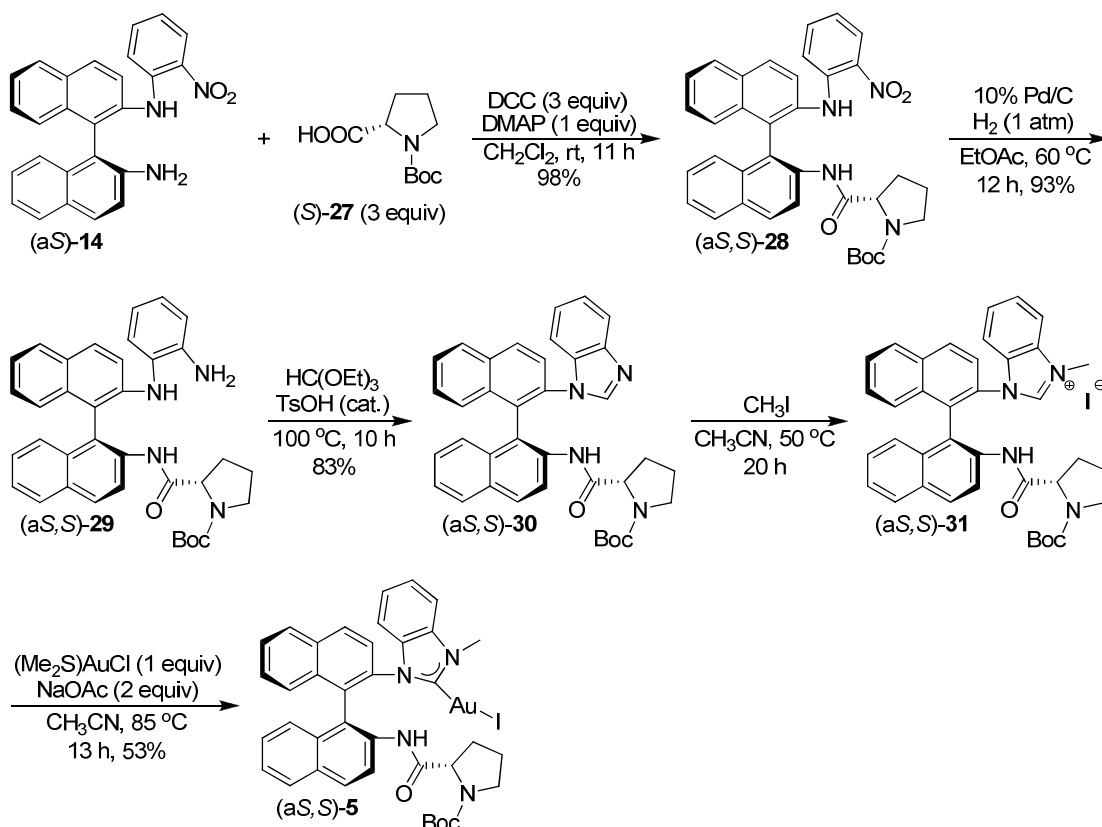

**Scheme S6**

#### Compound (aS,S)-28

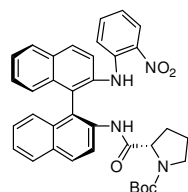

Red solid; m.p. 101.6-103.2  $^\circ\text{C}$  (dec.). IR (direct irradiation)  $\nu$  3360, 3270, 2973, 2958, 2930, 2873, 1694, 1611, 1593, 1573, 1493, 1414, 1365, 1340, 1248, 1159, 1087, 1039, 863, 815, 777, 738  $\text{cm}^{-1}$ .  $^1\text{H}$  NMR (400 MHz,  $\text{CDCl}_3$ , TMS)  $\delta$  1.18 (s, 9H), 1.47-2.30 (m, 6H), 2.93-2.95 (m, 1H), 4.10 (br, 1H), 6.66 (br, 1H), 7.17-7.58 (m, 8H), 7.78 (d,  $J = 8.0$  Hz, 1H), 7.85-8.06 (m, 5H), 8.73 (d,  $J = 8.8$  Hz, 1H), 8.96 (s, 1H) (Signals between  $\delta$  0.8-1.3 ppm were attributed to minor containing petroleum ether). LRMS (ESI)  $m/e$  625.2 [ $\text{M}^+ + \text{Na}$ ]; HRMS (ESI) calcd for [ $\text{C}_{36}\text{H}_{34}\text{N}_4\text{O}_5 + \text{Na}$ ] requires 625.2427, found 625.2431 [ $\text{M}^+ + \text{Na}$ ].

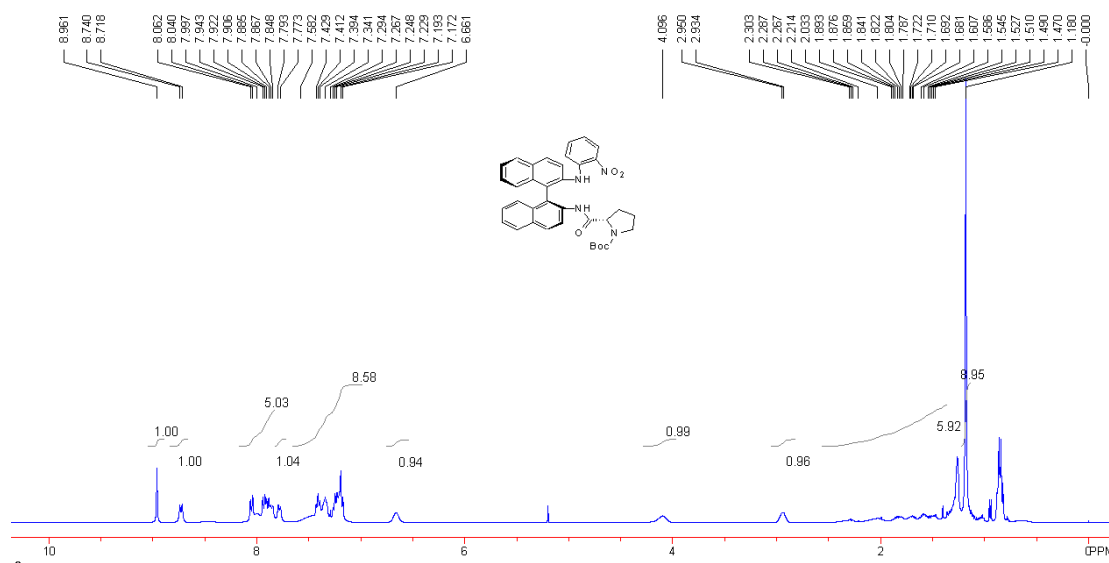

### Compound (aS,S)-29

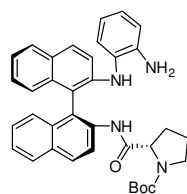

White solid; m.p. 109.8-111.5 °C (dec.).  $[\alpha]_D^{20} = -80$  (*c* 0.25, CHCl<sub>3</sub>). IR (direct irradiation)  $\nu$  3467, 3353, 3054, 2973, 2927, 2875, 1690, 1618, 1593, 1499, 1455, 1417, 1365, 1344, 1299, 1250, 1158, 1118, 1087, 869, 817, 776, 745 cm<sup>-1</sup>. <sup>1</sup>H NMR (400 MHz, CDCl<sub>3</sub>, TMS)  $\delta$  1.28 (s, 9H), 1.28-2.23 (m, 6H), 2.82-2.99 (m, 1H), 3.69 (br, 2H), 4.08-4.24 (m, 1H), 4.87 (s, 1H), 6.62-6.63 (m, 2H), 6.90-7.00 (m, 3H), 7.14-7.38 (m, 6H), 7.79 (d, *J* = 7.6 Hz, 1H), 7.84 (d, *J* = 9.2 Hz, 1H), 7.89 (d, *J* = 7.6 Hz, 1H), 8.02 (d, *J* = 8.0 Hz, 1H), 8.68-8.83 (m, 1H) (Signals between  $\delta$  0.8-1.3 ppm were attributed to minor containing petroleum ether). LRMS (ESI) *m/e* 573.3 [M<sup>+</sup>+H]; HRMS (ESI) calcd for [C<sub>36</sub>H<sub>36</sub>N<sub>4</sub>O<sub>3</sub>+H] requires 573.2866, found 573.2862 [M<sup>+</sup>+H].

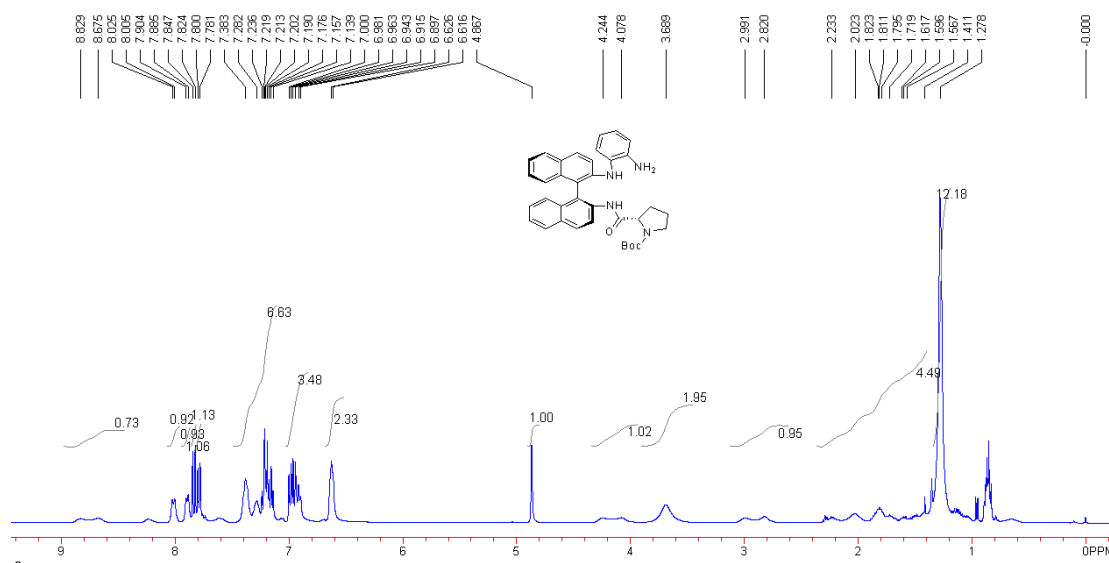

### Compound (aS,S)-**30**

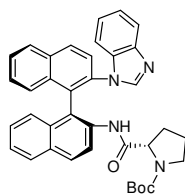

White solid; m.p. 134.0-136.5 °C (dec.).  $[\alpha]_D^{20} = -66$  ( $c$  0.25,  $\text{CHCl}_3$ ). IR (direct irradiation)  $\nu$  3364, 3055, 2972, 2927, 2873, 1694, 1614, 1597, 1502, 1489, 1453, 1392, 1365, 1284, 1236, 1159, 1120, 1087, 821, 742  $\text{cm}^{-1}$ .  $^1\text{H}$  NMR (400 MHz,  $\text{CDCl}_3$ , TMS)  $\delta$  1.09 (s, 9H), 1.50-2.60 (m, 6H), 2.96 (dt,  $J = 7.2, 10.4$  Hz, 1H), 4.04 (d,  $J = 8.4$  Hz, 1H), 7.06-7.08 (m, 2H), 7.16-7.40 (m, 7H), 7.61 (d,  $J = 7.2$  Hz, 2H), 7.74 (d,  $J = 8.0$  Hz, 1H), 7.80 (d,  $J = 8.8$  Hz, 1H), 7.86 (d,  $J = 7.2$  Hz, 1H), 8.10 (d,  $J = 6.8$  Hz, 1H), 8.26 (d,  $J = 8.4$  Hz, 1H), 8.58 (d,  $J = 8.8$  Hz, 1H) (Signals between  $\delta$  0.8-1.3 ppm were attributed to minor containing petroleum ether). LRMS (ESI)  $m/e$  583.3  $[\text{M}^+ + \text{H}]$ ; HRMS (ESI) calcd for  $[\text{C}_{37}\text{H}_{34}\text{N}_4\text{O}_3 + \text{H}]$  requires 583.2709, found 583.2706  $[\text{M}^+ + \text{H}]$ .

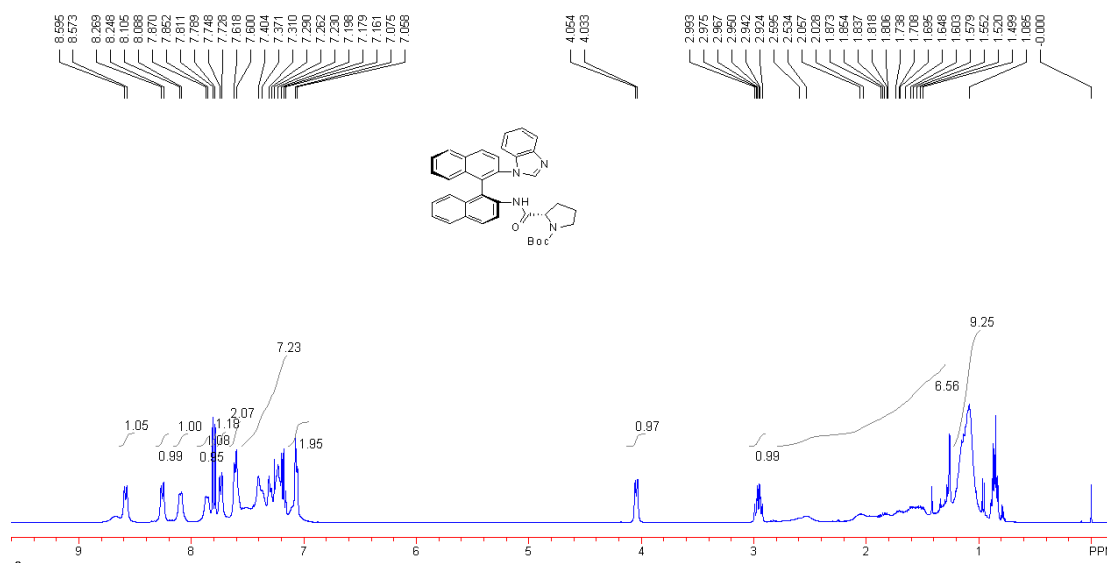

### Complex (aS,S)-5

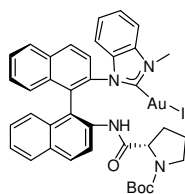

White solid; m.p. 224.9-225.8 °C (dec.).  $[\alpha]_D^{20} = -102$  (*c* 0.25, CHCl<sub>3</sub>). IR (direct irradiation)  $\nu$  3360, 2924, 2853, 1691, 1596, 1501, 1467, 1451, 1425, 1391, 1362, 1305, 1274, 1254, 1156, 1114, 1089, 873, 831, 817, 745 cm<sup>-1</sup>. <sup>1</sup>H NMR (400 MHz, CDCl<sub>3</sub>, TMS)  $\delta$  1.20 (s, 9H), 1.62-2.10 (m, 6H), 2.86 (s, 1H), 3.77 (s, 3H), 4.31 (br, 1H), 7.10-7.13 (m, 1H), 7.21-7.32 (m, 3H), 7.38 (t, *J* = 7.6 Hz, 1H), 7.45 (d, *J* = 8.0 Hz, 1H), 7.50-7.54 (m, 1H), 7.59 (t, *J* = 7.2 Hz, 2H), 7.63 (d, *J* = 9.2 Hz, 1H), 7.73 (t, *J* = 7.6 Hz, 1H), 7.89 (d, *J* = 8.8 Hz, 1H), 8.08 (s, 1H), 8.20 (d, *J* = 8.0 Hz, 1H), 8.31 (d, *J* = 9.2 Hz, 1H), 8.53 (s, 1H) (Signals between  $\delta$  0.8-1.3 ppm were attributed to minor containing petroleum ether). LRMS (ESI) *m/e* 793.2 [M<sup>+</sup>-I]; HRMS (ESI) calcd for [C<sub>38</sub>H<sub>36</sub>N<sub>4</sub>IO<sub>3</sub>Au-I] requires 793.2453, found 793.2471 [M<sup>+</sup>-I].

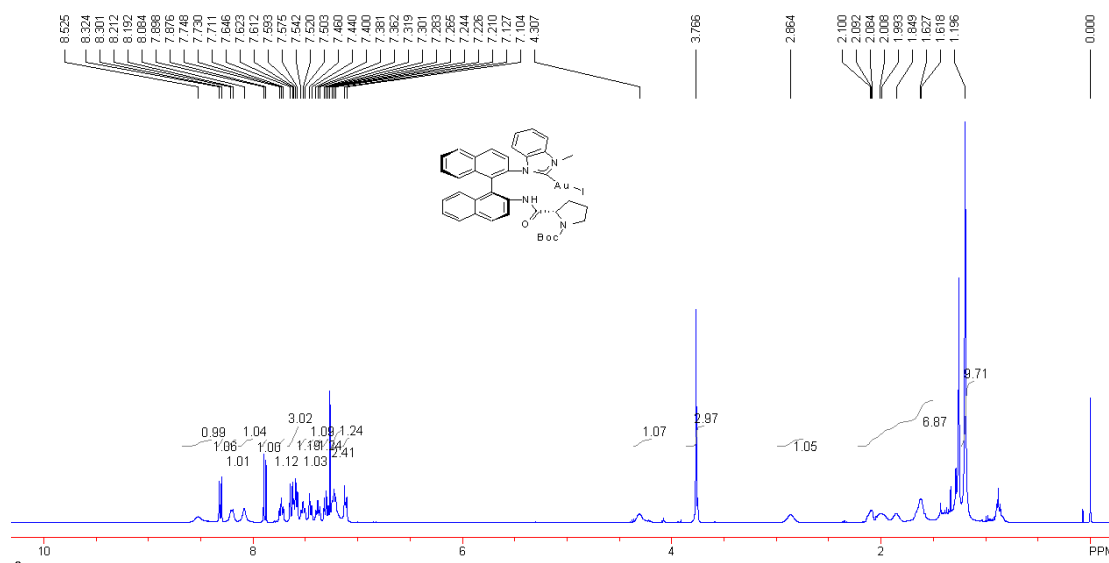

## (6) General Procedure for the Synthesis of Gold(I) Complex 6

Under argon atmosphere, to the solution of **14** (810 mg, 2 mmol) in dry toluene (4 mL) was added *i*Pr<sub>2</sub>NEt (0.76 mL, 4.4 mmol) and Br(CH<sub>2</sub>)<sub>4</sub>Br (0.26 mL, 2.2 mmol) in sequence. After refluxing at 110 °C for two days, the reaction system was cooled to room temperature and quenched via addition of water (30 mL) followed by the extraction with ethyl acetate for three times. The combined organic phases were dried over anhydrous Na<sub>2</sub>SO<sub>4</sub>, concentrated under reduced pressure, and then purified by a silica gel flash column chromatography (eluent: petroleum ether/EtOAc: 50/1) to give **32** as a red solid in 66% yield.

A mixture of **32** (575 mg, 1.25 mmol) and 10% Pd/C (125 mg) in EtOAc (40 mL) was stirred under H<sub>2</sub> atmosphere (1 atm) at 60 °C for 9 h. After cooling to room temperature, the suspension was filtered through Celite to remove Pd/C. Then volatiles were removed under reduced pressure and the residue was purified by a silica gel flash column chromatography (eluent: petroleum ether/EtOAc, 25/1) to give **33** as a white solid in 79% yield.

Compound **33** (350 mg, 0.81 mmol) and triethyl orthoformate (10 mL) containing a catalytic amount of TsOH (16 mg) were heated at 100 °C for 24 h. After removing triethyl orthoformate under reduced pressure, the residue was purified by a silica gel flash column chromatography (eluent: petroleum ether/EtOAc, 3/1) to give **34** as a pale yellow solid in 80% yield.

Compound **34** (110 mg, 0.25 mmol) and CH<sub>3</sub>I (0.16 mL, 2.5 mmol) in CH<sub>3</sub>CN (5 mL)

were stirred under reflux for 19 h. After cooling to room temperature, volatiles were removed under reduced pressure and the obtained solid compound **35** was used for the next step without further purification.

Under argon atmosphere, to a flame-dried Schlenk tube equipped with a septum and stirring bar were added NHC precursor **35** (118 mg, 0.2 mmol), NaOAc (33 mg, 0.4 mmol) and [(Me<sub>2</sub>S)AuCl] (60 mg, 0.2 mmol) followed by the addition of dry CH<sub>3</sub>CN (10 mL) as the solvent. After refluxing at 85 °C for 22 h, the reaction mixture was cooled to room temperature and filtered through Celite. Then volatiles were removed under reduced pressure and the residue was purified by a silica gel flash column chromatography (eluent: petroleum ether/CH<sub>2</sub>Cl<sub>2</sub>, 2/1) to give complex **6** as a white solid in 64% yield. Single crystals of complex **6** suitable for an X-ray diffraction study were grown from the solution of **6** in mixed petroleum ether/CH<sub>3</sub>CN/CH<sub>2</sub>Cl<sub>2</sub> (1:1:1) (Scheme S7).

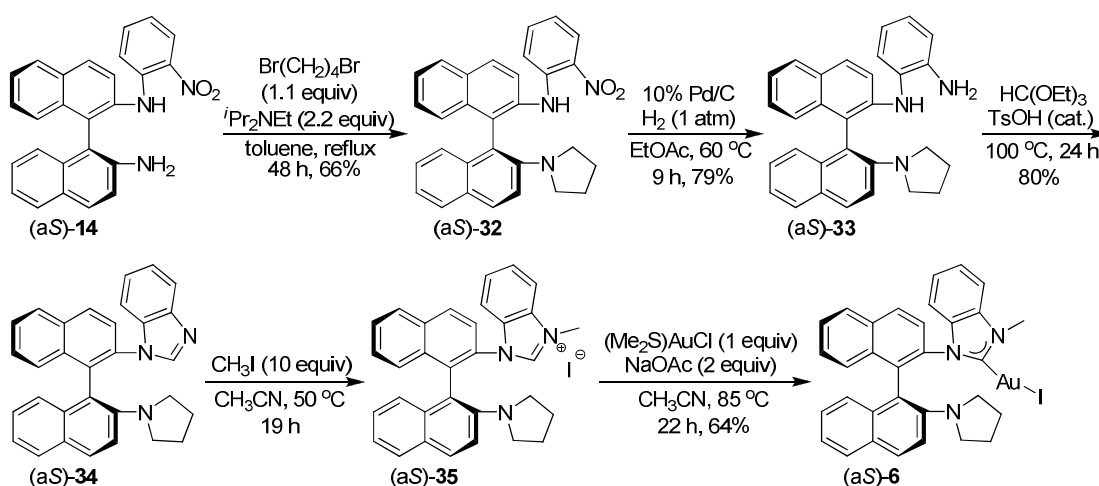

**Scheme S7**

#### Compound (aS)-**32**

Red solid; m.p. 72.6-74.6 °C.  $[\alpha]_D^{20} = +362$  (*c* 0.125, CHCl<sub>3</sub>). IR (direct irradiation)  $\nu$  3298, 3061, 2957, 2870, 1611, 1594, 1570, 1494, 1443, 1427, 1413, 1343, 1297, 1245, 1146, 1077, 1039, 1006, 864, 809, 767, 737 cm<sup>-1</sup>. <sup>1</sup>H NMR (300 MHz, CDCl<sub>3</sub>, TMS)  $\delta$  1.63-1.71 (m, 4H), 2.86-2.94 (m, 2H), 3.01-3.06 (m, 2H), 6.57-6.63 (m, 1H), 6.95 (d, *J* = 8.7 Hz, 1H), 7.02-7.08 (m, 1H), 7.11-7.22 (m, 3H), 7.29-7.38 (m, 2H), 7.42-7.47 (m, 1H), 7.52 (d, *J* = 8.4 Hz, 1H), 7.64 (d, *J* = 8.7 Hz, 1H), 7.72 (d, *J* = 7.5

Hz, 1H), 7.80 (d,  $J = 9.3$  Hz, 1H), 7.89-7.94 (m, 2H), 7.99-8.02 (m, 1H), 9.52 (s, 1H);  $^{13}\text{C}$  NMR (100 MHz,  $\text{CDCl}_3$ , TMS)  $\delta$  25.5, 50.4, 115.3, 116.5, 116.9, 117.1, 122.1, 122.5, 124.4, 125.2, 126.1, 126.3, 126.7, 127.4, 127.8, 127.85, 127.88, 128.5, 129.3, 130.5, 131.1, 133.4, 134.0, 135.0, 135.2, 135.6, 142.2, 147.0. LRMS (ESI)  $m/e$  460.2  $[\text{M}^+ + \text{H}]$ ; HRMS (ESI) calcd for  $[\text{C}_{30}\text{H}_{25}\text{N}_3\text{O}_2 + \text{H}]$  requires 460.2025, found 460.2037  $[\text{M}^+ + \text{H}]$ .

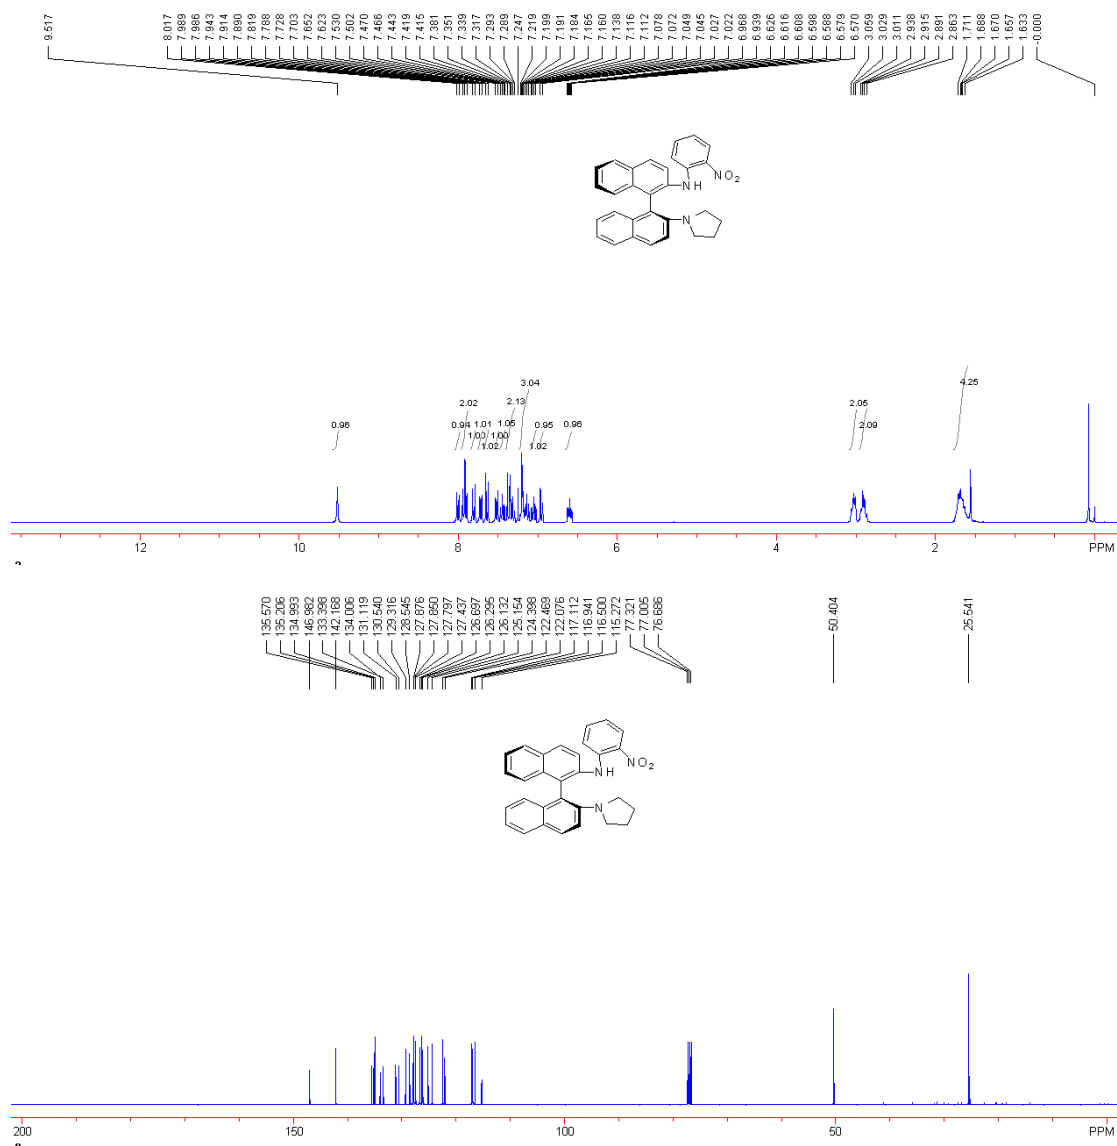

### Compound (aS)-33

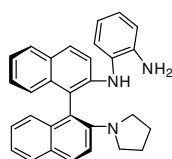

White solid; m.p. 103.8-105.8  $^{\circ}\text{C}$ .  $[\alpha]_{\text{D}}^{20} = +45$  ( $c$  0.25,  $\text{CHCl}_3$ ). IR (direct irradiation)  $\nu$  3457, 3358, 3055, 2962, 2925, 2867, 1615, 1594, 1502, 1459, 1415, 1378, 1344, 1295, 1248, 1216, 1148, 1004, 808, 744  $\text{cm}^{-1}$ .  $^1\text{H}$  NMR (400

MHz, CDCl<sub>3</sub>, TMS)  $\delta$  1.62-1.71 (m, 4H), 2.94-2.97 (m, 2H), 3.07-3.12 (m, 2H), 3.77 (br, 2H), 5.12 (s, 1H), 6.66-6.71 (m, 2H), 6.95-6.99 (m, 1H), 7.01-7.03 (m, 1H), 7.06 (d,  $J$  = 9.2 Hz, 1H), 7.13-7.14 (m, 2H), 7.17-7.23 (m, 4H), 7.32 (d,  $J$  = 9.2 Hz, 1H), 7.72-7.77 (m, 3H), 7.83 (d,  $J$  = 9.2 Hz, 1H); <sup>13</sup>C NMR (100 MHz, CDCl<sub>3</sub>, TMS)  $\delta$  25.7, 50.1, 113.5, 115.3, 115.7, 117.3, 118.3, 118.6, 122.1, 122.2, 124.3, 125.5, 126.2, 126.3, 126.6, 126.7, 127.87, 127.89, 127.95, 127.96, 128.1, 128.7, 129.3, 134.6, 135.2, 142.2, 143.0, 146.6. LRMS (ESI)  $m/e$  430.2 [M<sup>+</sup>+H]; HRMS (ESI) calcd for [C<sub>30</sub>H<sub>27</sub>N<sub>3</sub>+H] requires 430.2283, found 430.2270 [M<sup>+</sup>+H].

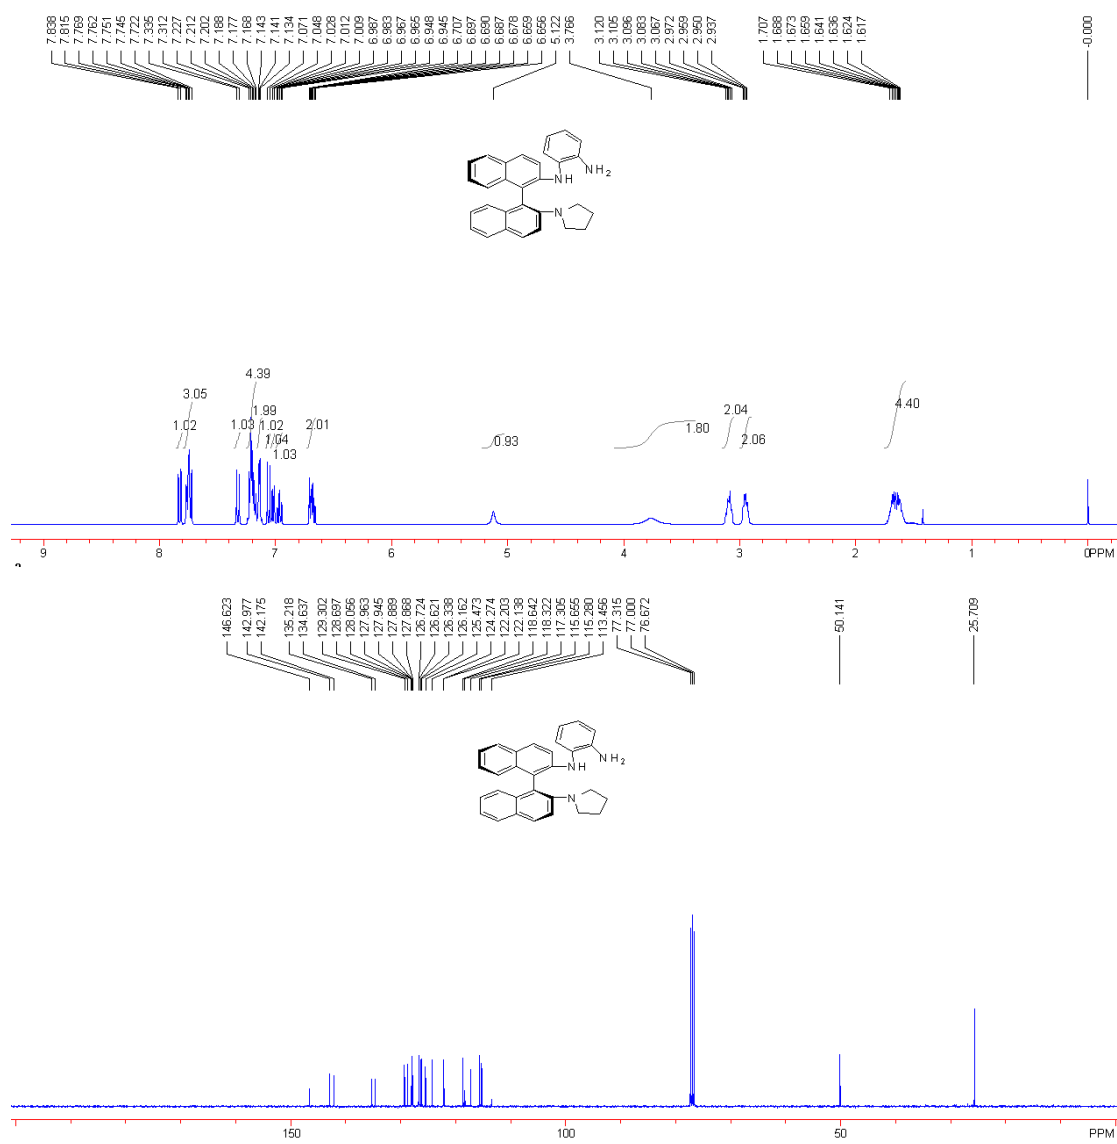

### Compound (aS)-34

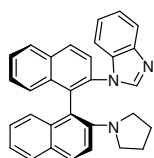

Pale yellow solid; m.p. 126.3-127.8 °C.  $[\alpha]_D^{20}$  = +66 ( $c$  0.25, CHCl<sub>3</sub>). IR (direct

irradiation)  $\nu$  3055, 2958, 2925, 2866, 1614, 1595, 1505, 1487, 1453, 1427, 1379, 1349, 1284, 1234, 1147, 1002, 809, 741  $\text{cm}^{-1}$ .  $^1\text{H}$  NMR (400 MHz,  $\text{CDCl}_3$ , TMS)  $\delta$  1.24-1.28 (m, 2H), 1.50-1.52 (m, 2H), 2.29 (t,  $J = 7.6$  Hz, 2H), 2.64 (dd,  $J = 9.2, 16.0$  Hz, 2H), 6.90 (d,  $J = 8.8$  Hz, 1H), 7.01-7.04 (m, 2H), 7.10-7.20 (m, 4H), 7.28 (d,  $J = 7.2$  Hz, 1H), 7.41-7.46 (m, 1H), 7.57-7.61 (m, 1H), 7.64-7.72 (m, 4H), 7.77 (d,  $J = 8.4$  Hz, 1H), 8.02 (d,  $J = 8.4$  Hz, 1H), 8.11 (d,  $J = 8.8$  Hz, 1H);  $^{13}\text{C}$  NMR (100 MHz,  $\text{CDCl}_3$ , TMS)  $\delta$  25.5, 49.8, 109.6, 113.3, 116.8, 119.9, 122.02, 122.04, 122.7, 123.9, 124.2, 126.7, 126.8, 127.2, 127.5, 128.1, 128.2, 128.3, 129.2, 129.7, 132.9, 133.5, 134.3, 134.6, 135.18, 135.21, 142.7, 142.8, 146.3. LRMS (ESI)  $m/e$  440.2 [ $\text{M}^+\text{H}$ ]; HRMS (ESI) calcd for  $[\text{C}_{31}\text{H}_{25}\text{N}_3+\text{H}]$  requires 440.2127, found 440.2125 [ $\text{M}^+\text{H}$ ].

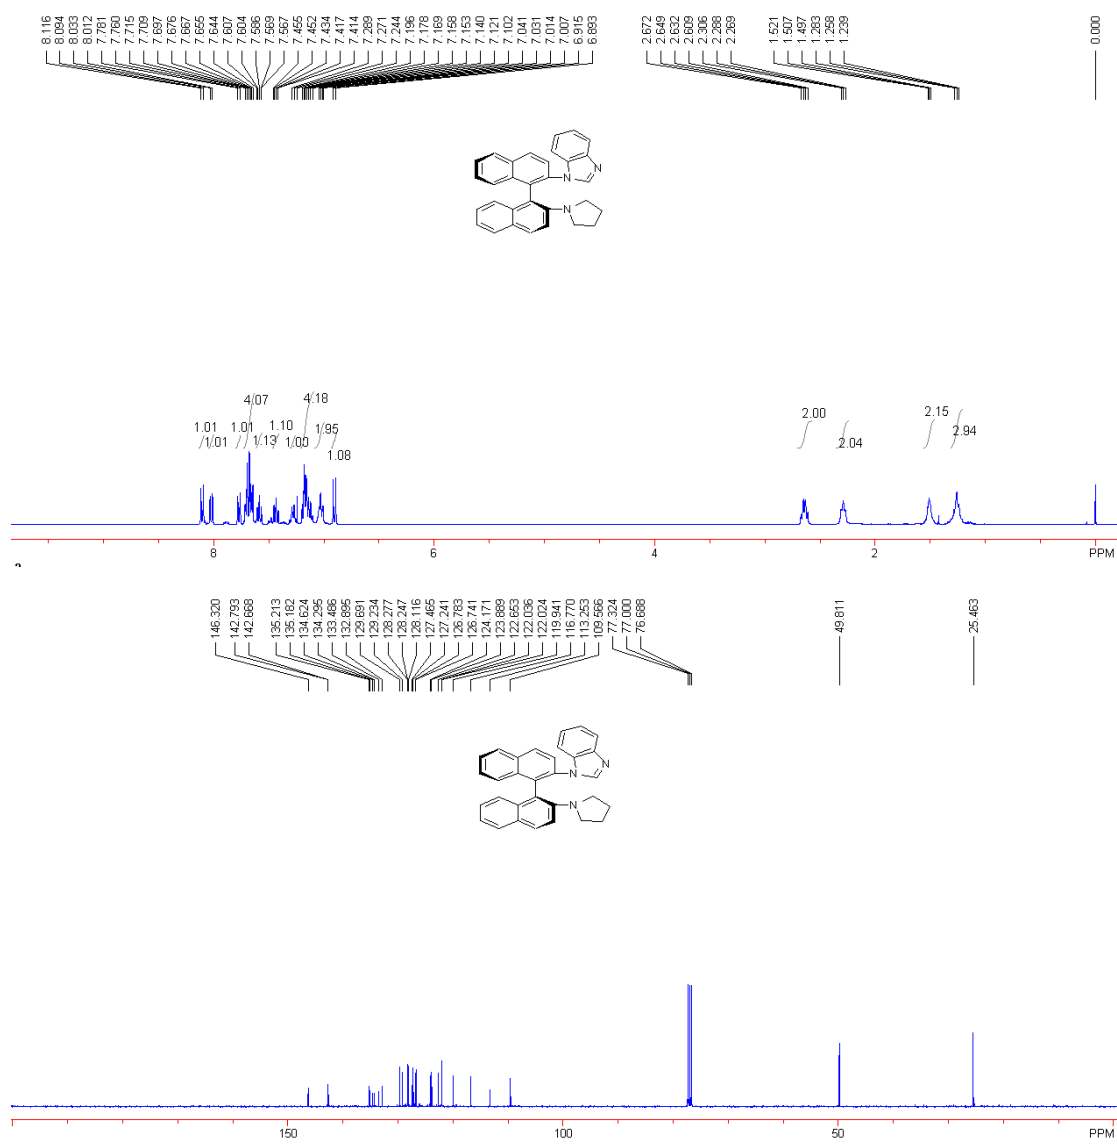

Chemical structure of compound 10 is shown above the spectrum. The structure is a complex molecule featuring a central gold atom (Au) coordinated by a bipyridine ligand, a phenylpyridine ligand, and a phenylpyrrolidine ligand. The spectrum shows peaks from 1.80 to 8.13 ppm. Integration values are provided for several peak groups: 1.01, 1.03, 1.02, 2.07, 1.95, 1.02, 0.99, 1.00, 1.00, 3.00, 1.99, 2.01, 2.06, 2.46.

To a mixture of 20% H<sub>2</sub>SO<sub>4</sub> (aqueous, 1 mL) and 40% HCHO (aqueous, 1 mL) in THF (4 mL) were added dropwise the solution of **14** (405 mg, 1 mmol) in THF (20 mL) and simultaneously the solution of NaBH<sub>4</sub> (265 mg, 7 mmol) in water (2 mL) at 0 °C within 15 minutes. After further stirring at 0 °C for 1 h, the reaction system was quenched via addition of

20% NaOH (aqueous) until pH >7 and then extracted with ethyl acetate for three times. The combined organic phases were dried over anhydrous Na<sub>2</sub>SO<sub>4</sub>, concentrated under reduced pressure, and then purified by a silica gel flash column chromatography (petroleum ether/EtOAc: 150/1) to give **36** as a red solid in 87% yield.

A mixture of **36** (347 mg, 0.8 mmol) and 10% Pd/C (80 mg) in EtOAc (16 mL) was stirred under H<sub>2</sub> atmosphere (1 atm) at 60 °C for 18 h. After cooling to room temperature, the suspension was filtered through Celite to remove Pd/C. Then volatiles were removed under reduced pressure and the residue was purified by a silica gel flash column chromatography (eluent: petroleum ether/EtOAc, 20/1) to give **37** as a white solid in 82% yield.

Compound **37** (260 mg, 0.64 mmol) and triethyl orthoformate (10 mL) containing a catalytic amount of TsOH (13 mg) were heated at 100 °C for 21 h. After removing triethyl orthoformate under reduced pressure, the residue was purified by a silica gel flash column chromatography (eluent: petroleum ether/EtOAc, 4/1) to give **38** as a white solid in 68% yield.

Compound **38** (124 mg, 0.3 mmol) and CH<sub>3</sub>I (0.2 mL, 3 mmol) in CH<sub>3</sub>CN (6 mL) were stirred under reflux for 16 h. After cooling to room temperature, volatiles were removed under reduced pressure and the obtained solid compound **39** was used for the next step without further purification.

Under argon atmosphere, to a flame-dried Schlenk tube equipped with a septum and stirring bar were added NHC precursor **39** (56 mg, 0.1 mmol), NaOAc (17 mg, 0.2 mmol) and [(Me<sub>2</sub>S)AuCl] (30 mg, 0.1 mmol) followed by the addition of dry CH<sub>3</sub>CN (5 mL) as the solvent. After refluxing at 85 °C for 24 h, the reaction mixture was cooled to room temperature and filtered through Celite. Then volatiles were removed under reduced pressure and the residue was purified by a silica gel flash column chromatography (eluent: petroleum ether/EtOAc, 8/1) to give complex **7** as a white solid in 42% yield (Scheme S8).

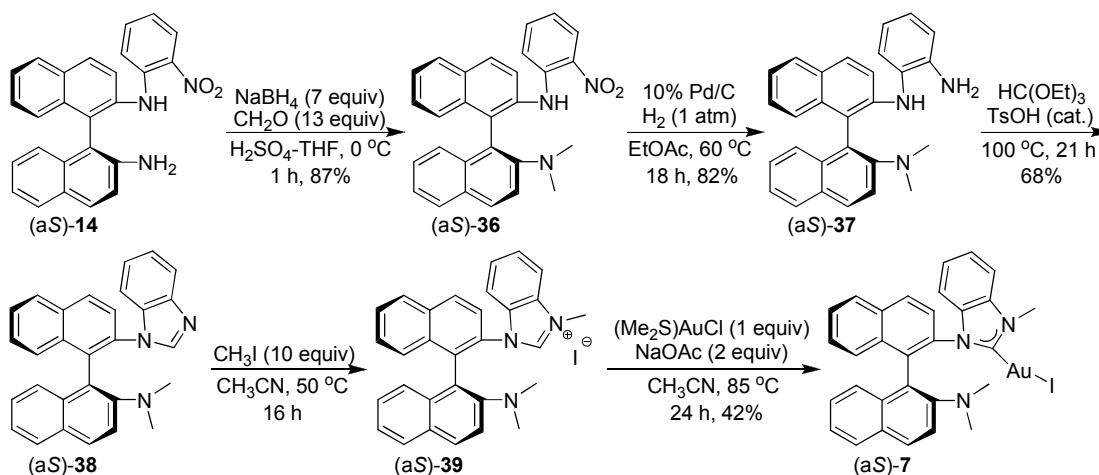

**Scheme S8**

### Compound (aS)-36

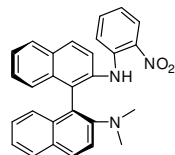

It is a known compound.<sup>[3]</sup> Red solid; m.p. 135.5-136.9 °C.  $[\alpha]_D^{20} = +53$  ( $c$  0.25,  $\text{CHCl}_3$ ). IR (direct irradiation)  $\nu$  3325, 2957, 2923, 2853, 1611, 1592, 1568, 1493, 1409, 1332, 1257, 1245, 1211, 1189, 1144, 1080, 1039, 989, 964, 863, 813, 737  $\text{cm}^{-1}$ .  $^1\text{H}$  NMR (400 MHz,  $\text{CDCl}_3$ , TMS)  $\delta$  2.60 (s, 6H), 6.58 (ddd,  $J = 1.6, 6.4, 8.4$  Hz, 1H), 7.00 (d,  $J = 8.8$  Hz, 1H), 7.07-7.28 (m, 6H), 7.44 (ddd,  $J = 3.6, 4.8, 8.0$  Hz, 1H), 7.50 (d,  $J = 8.8$  Hz, 1H), 7.67 (d,  $J = 8.8$  Hz, 1H), 7.77 (d,  $J = 8.0$  Hz, 1H), 7.90 (d,  $J = 9.2$  Hz, 1H), 7.92 (d,  $J = 9.2$  Hz, 1H), 7.96 (d,  $J = 9.2$  Hz, 1H), 7.99 (dd,  $J = 1.6, 9.2$  Hz, 1H), 9.56 (s, 1H). LRMS (ESI)  $m/e$  434.2  $[\text{M}^+ + \text{H}]$ ; HRMS (ESI) calcd for  $[\text{C}_{28}\text{H}_{23}\text{N}_3\text{O}_2 + \text{H}]$  requires 434.1869, found 434.1868  $[\text{M}^+ + \text{H}]$ .

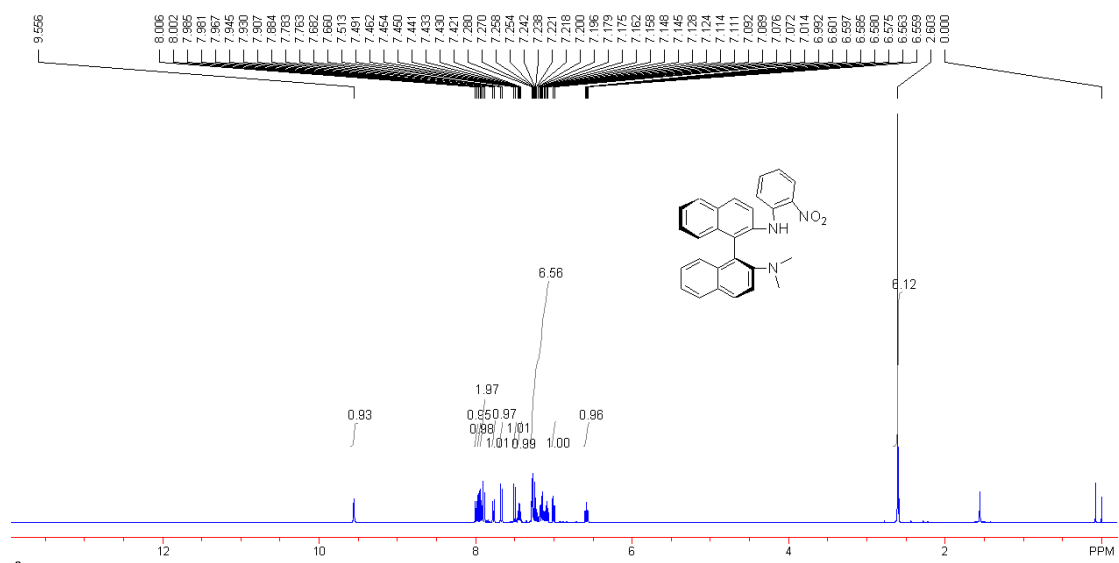

### Compound (aS)-37

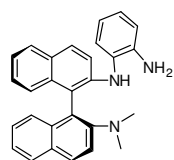

It is a known compound.<sup>[3]</sup> White solid; m.p. 144.5-146.0 °C. IR (direct irradiation)  $\nu$  3448, 3375, 3052, 2921, 2783, 1615, 1593, 1500, 1478, 1414, 1342, 1294, 1249, 1213, 1129, 1049, 987, 964, 937, 861, 814, 743  $\text{cm}^{-1}$ .  $^1\text{H}$  NMR (400 MHz,  $\text{CDCl}_3$ , TMS)  $\delta$  2.55 (s, 6H), 3.78 (br, 2H), 5.08 (s, 1H), 6.60 (d,  $J = 8.0$  Hz, 1H), 6.62 (t,  $J = 7.6$  Hz, 1H), 6.91 (t,  $J = 7.6$  Hz, 1H), 6.97 (d,  $J = 7.6$  Hz, 1H), 7.04-7.18 (m, 5H), 7.21 (d,  $J = 8.4$  Hz, 1H), 7.26 (t,  $J = 7.6$  Hz, 1H), 7.45 (d,  $J = 9.2$  Hz, 1H), 7.70-7.74 (m, 2H), 7.78 (d,  $J = 7.6$  Hz, 1H), 7.87 (d,  $J = 9.2$  Hz, 1H). LRMS (ESI)  $m/e$  404.2 [ $\text{M}^+ + \text{H}$ ]; HRMS (ESI) calcd for  $[\text{C}_{28}\text{H}_{25}\text{N}_3 + \text{H}]$  requires 404.2127, found 404.2125 [ $\text{M}^+ + \text{H}$ ].

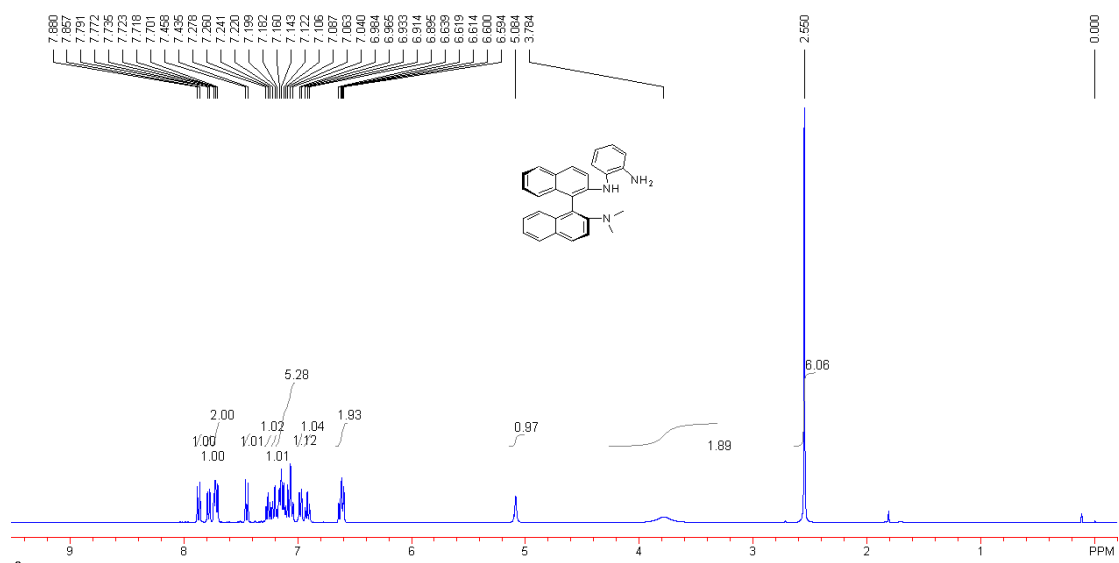

Compound (aS)-**38**<sup>[3]</sup>

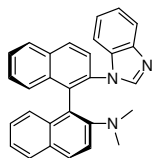

White solid; m.p. 151.4-152.8 °C.  $[\alpha]_D^{20} = -72$  ( $c$  0.25,  $\text{CHCl}_3$ ). IR (direct irradiation)  $\nu$  3055, 2924, 2853, 2785, 1681, 1614, 1594, 1505, 1488, 1453, 1428, 1343, 1303, 1284, 1235, 1142, 985, 818, 742  $\text{cm}^{-1}$ .  $^1\text{H}$  NMR (400 MHz,  $\text{CDCl}_3$ , TMS)  $\delta$  1.92 (s, 6H), 7.02-7.04 (m, 2H), 7.15-7.20 (m, 3H), 7.22-7.26 (m, 1H), 7.29-7.33 (m, 2H), 7.39 (t,  $J = 7.2$  Hz, 1H), 7.51 (d,  $J = 8.4$  Hz, 1H), 7.57 (t,  $J = 7.6$  Hz, 1H), 7.66-7.68 (m, 1H), 7.74-7.79 (m, 3H), 8.04 (d,  $J = 7.6$  Hz, 1H), 8.12 (d,  $J = 8.8$  Hz, 1H);  $^{13}\text{C}$  NMR (100 MHz,  $\text{CDCl}_3$ , TMS)  $\delta$  42.6, 110.0, 119.0, 119.9, 121.4, 121.9, 122.8, 123.6, 124.69, 124.73, 126.6, 126.8, 127.3, 127.5, 128.4, 129.2, 129.3, 129.9, 132.7, 133.1, 133.2, 134.3, 134.5, 134.8, 142.7, 142.8, 150.0. LRMS (ESI)  $m/e$  414.2  $[\text{M}^+ + \text{H}]$ ; HRMS (ESI) calcd for  $[\text{C}_{29}\text{H}_{23}\text{N}_3 + \text{H}]$  requires 414.1970, found 414.1967  $[\text{M}^+ + \text{H}]$ .

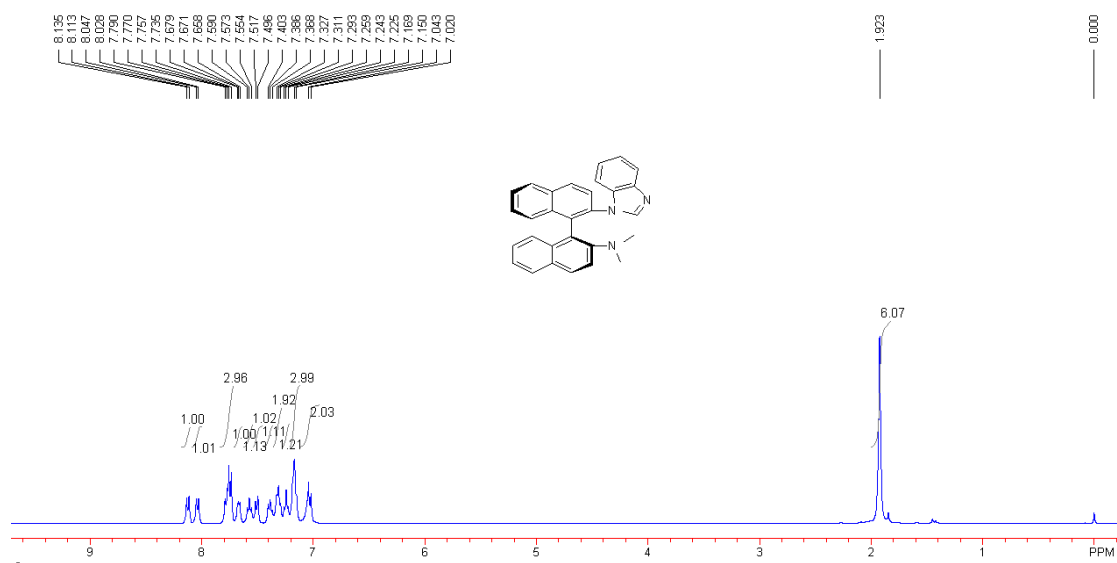

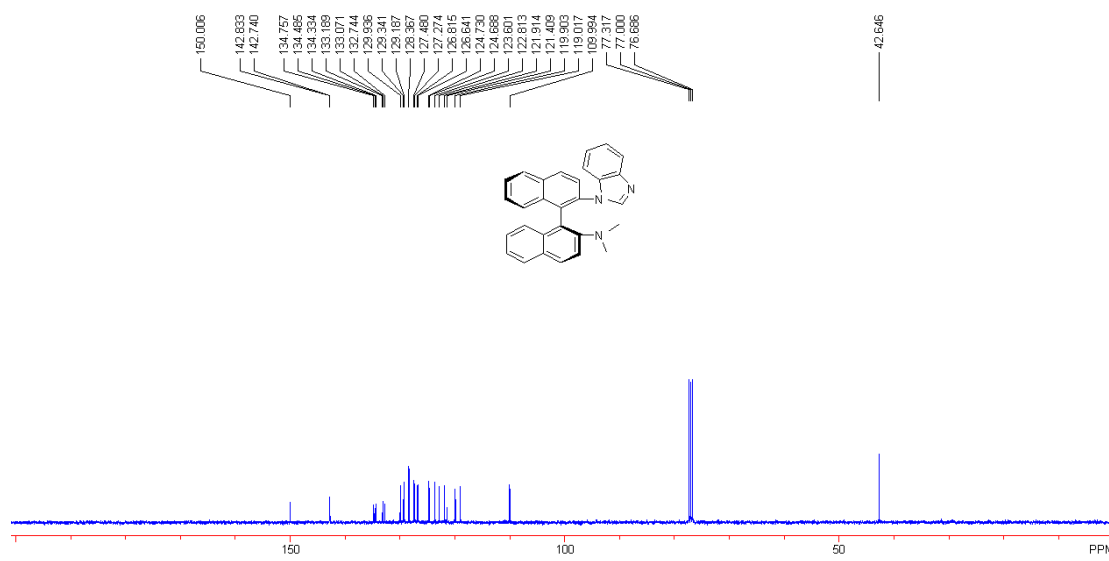

### Complex (aS)-7

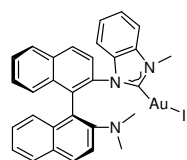

White solid; m.p. 259.0-260.7 °C (dec.).  $[\alpha]_D^{20} = +48$  (*c* 0.25, CHCl<sub>3</sub>). IR (direct irradiation)  $\nu$  3061, 2923, 2899, 2852, 2776, 1712, 1593, 1505, 1464, 1397, 1360, 1245, 1126, 1097, 1081, 977, 859, 819, 804, 743, 702 cm<sup>-1</sup>. <sup>1</sup>H NMR (400 MHz, CDCl<sub>3</sub>, TMS)  $\delta$  2.46 (s, 6H), 4.07 (s, 3H), 6.33 (d, *J* = 8.0 Hz, 1H), 6.41 (t, *J* = 7.2 Hz, 1H), 6.89 (d, *J* = 8.8 Hz, 1H), 7.00 (t, *J* = 7.6 Hz, 1H), 7.16-7.27 (m, 4H), 7.42-7.45 (m, 2H), 7.58-7.65 (m, 3H), 7.85 (d, *J* = 8.4 Hz, 1H), 8.07 (d, *J* = 7.6 Hz, 1H), 8.16 (d, *J* = 8.4 Hz, 1H). LRMS (ESI) *m/e* 624.2 [M<sup>+</sup>-I]; HRMS (ESI) calcd for [C<sub>30</sub>H<sub>25</sub>N<sub>3</sub>IAu-I] requires 624.1714, found 624.1696 [M<sup>+</sup>-I].

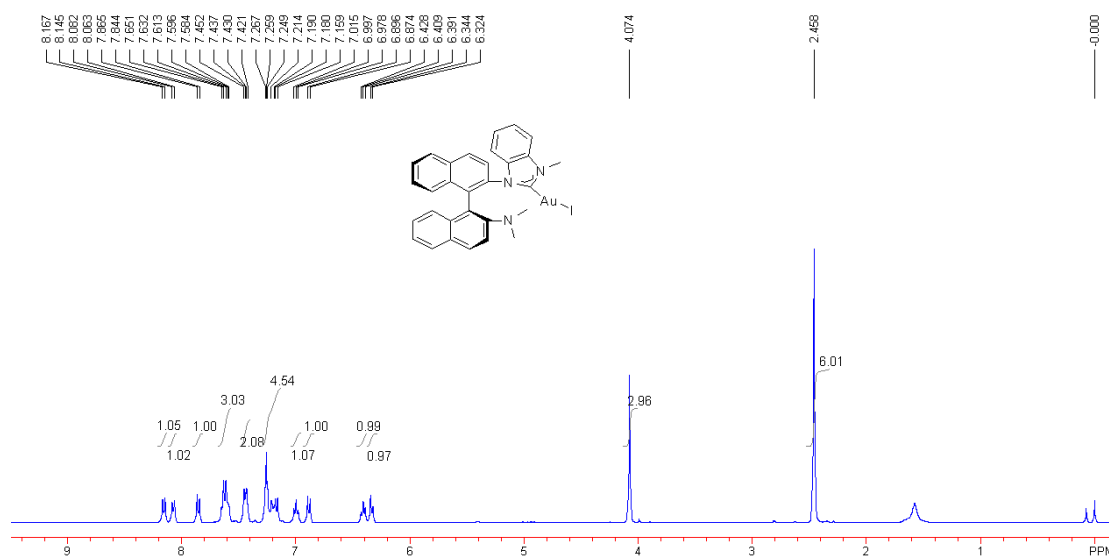

### (8) General Procedure for the Synthesis of Gold(I) Complex 8

To the solution of **14** (405 mg, 1 mmol) in THF (30 mL) were added benzaldehyde (1 mL, 10 mmol) and 20% H<sub>2</sub>SO<sub>4</sub> aqueous (2 mL) followed by the addition of NaBH<sub>4</sub> (378 mg, 10 mmol) carefully at room temperature within 15 minutes. After further stirring at room temperature for 1 h, the reaction system was quenched via addition of 20% NaOH (aqueous) until pH >7 and then extracted with ethyl acetate for three times. The combined organic phases were dried over anhydrous Na<sub>2</sub>SO<sub>4</sub>, concentrated under reduced pressure, and then purified by a silica gel flash column chromatography (eluent: petroleum ether/EtOAc: 60/1) to give **40** as a red solid in 78% yield.

A mixture of **40** (248 mg, 0.5 mmol) and 10% Pd/C (50 mg) in EtOAc (15 mL) was stirred under H<sub>2</sub> atmosphere (1 atm) at 60 °C for 12 h. After cooling to room temperature, the suspension was filtered through Celite to remove Pd/C. Then volatiles were removed under reduced pressure and the residue was purified by a silica gel flash column chromatography (eluent: petroleum ether/EtOAc, 15/1; containing minor NEt<sub>3</sub>) to give **41** as a white solid in > 99% yield.

Compound **41** (210 mg, 0.45 mmol) and triethyl orthoformate (10 mL) containing a catalytic amount of TsOH (9 mg) were heated at 100 °C for 24 h. After removing triethyl orthoformate under reduced pressure, the residue was purified by a silica gel flash column chromatography (eluent: petroleum ether/EtOAc, 4/1) to give **42** as a white solid in 66% yield.

Compound **42** (95 mg, 0.2 mmol) and CH<sub>3</sub>I (0.25 mL, 4 mmol) in CH<sub>3</sub>CN (6 mL) were stirred under reflux for 60 h. After cooling to room temperature, volatiles were removed under reduced pressure and the obtained solid **43** was used for the next step without further purification.

Under argon atmosphere, to a flame-dried Schlenk tube equipped with a septum and stirring bar were added NHC precursor **43** (62 mg, 0.1 mmol), NaOAc (17 mg, 0.2 mmol) and [(Me<sub>2</sub>S)AuCl] (30 mg, 0.1 mmol) followed by the addition of dry CH<sub>3</sub>CN (5 mL) as the solvent. After refluxing at 85 °C for 24 h, the reaction mixture was cooled to room temperature and filtered through Celite. Then volatiles were removed under reduced pressure and the residue was purified by a silica gel flash column chromatography (eluent: petroleum

ether/EtOAc, 8/1) to give complex **8** as a pale yellow solid in 30% yield (Scheme S9).

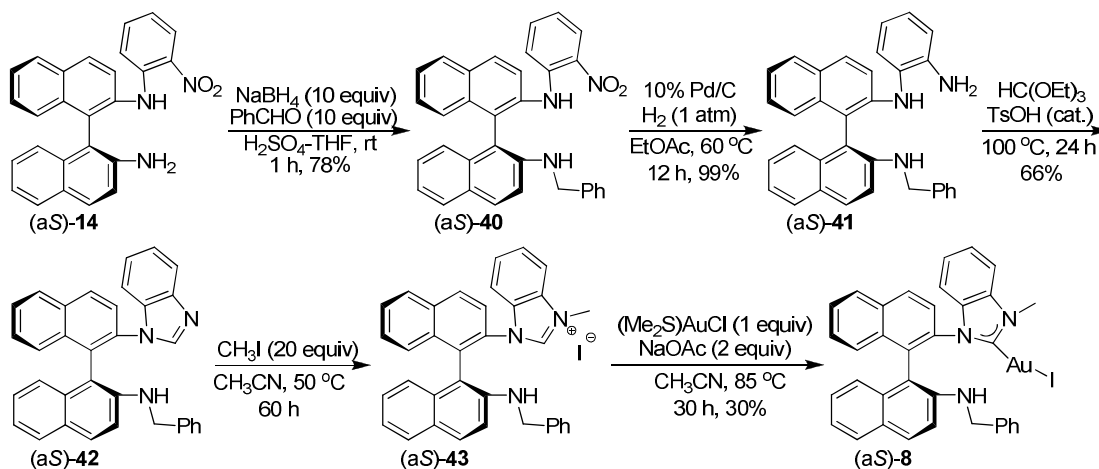

**Scheme S9**

#### Compound (aS)-40

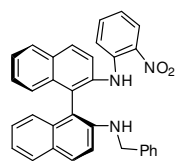

Red solid; m.p. 87.4-89.0  $^\circ\text{C}$ .  $[\alpha]_D^{20} = +186$  ( $c$  0.25,  $\text{CHCl}_3$ ). IR (direct irradiation)  $\nu$  3417, 3326, 3053, 2956, 2924, 2853, 1611, 1592, 1572, 1492, 1413, 1339, 1293, 1246, 1146, 1077, 1040, 1025, 971, 864, 809, 736, 696  $\text{cm}^{-1}$ .

$^1\text{H}$  NMR (400 MHz,  $\text{CDCl}_3$ , TMS)  $\delta$  4.01 (br, 1H), 4.39 (d,  $J = 15.6$  Hz, 1H), 4.43 (d,  $J = 15.6$  Hz, 1H), 6.72 (ddd,  $J = 1.2, 6.8, 8.4$  Hz, 1H), 6.92 (dd,  $J = 0.4, 8.0$  Hz, 1H), 7.12-7.18 (m, 8H), 7.29-7.37 (m, 3H), 7.42 (dd,  $J = 0.8, 8.8$  Hz, 1H), 7.46 (ddd,  $J = 2.4, 6.0, 8.4$  Hz, 1H), 7.74-7.76 (m, 1H), 7.78 (d,  $J = 8.8$  Hz, 1H), 7.82 (d,  $J = 8.8$  Hz, 1H), 7.93 (d,  $J = 8.4$  Hz, 1H), 7.99 (d,  $J = 8.8$  Hz, 1H), 8.04 (dd,  $J = 1.2, 8.4$  Hz, 1H), 9.24 (s, 1H);  $^{13}\text{C}$  NMR (100 MHz,  $\text{CDCl}_3$ , TMS)  $\delta$  47.6, 111.9, 113.9, 116.2, 117.9, 121.8, 122.1, 123.1, 125.3, 125.5, 125.9, 126.6, 126.79, 126.82, 126.9, 127.2, 127.6, 128.2, 128.3, 128.4, 129.3, 130.1, 131.5, 133.4, 133.9, 134.1, 135.2, 136.2, 139.3, 141.5, 143.6. LRMS (ESI)  $m/e$  496.2 [ $\text{M}^+\text{+H}$ ]; HRMS (ESI) calcd for  $[\text{C}_{33}\text{H}_{25}\text{N}_3\text{O}_2\text{+H}]$  requires 496.2025, found 496.2025 [ $\text{M}^+\text{+H}$ ].

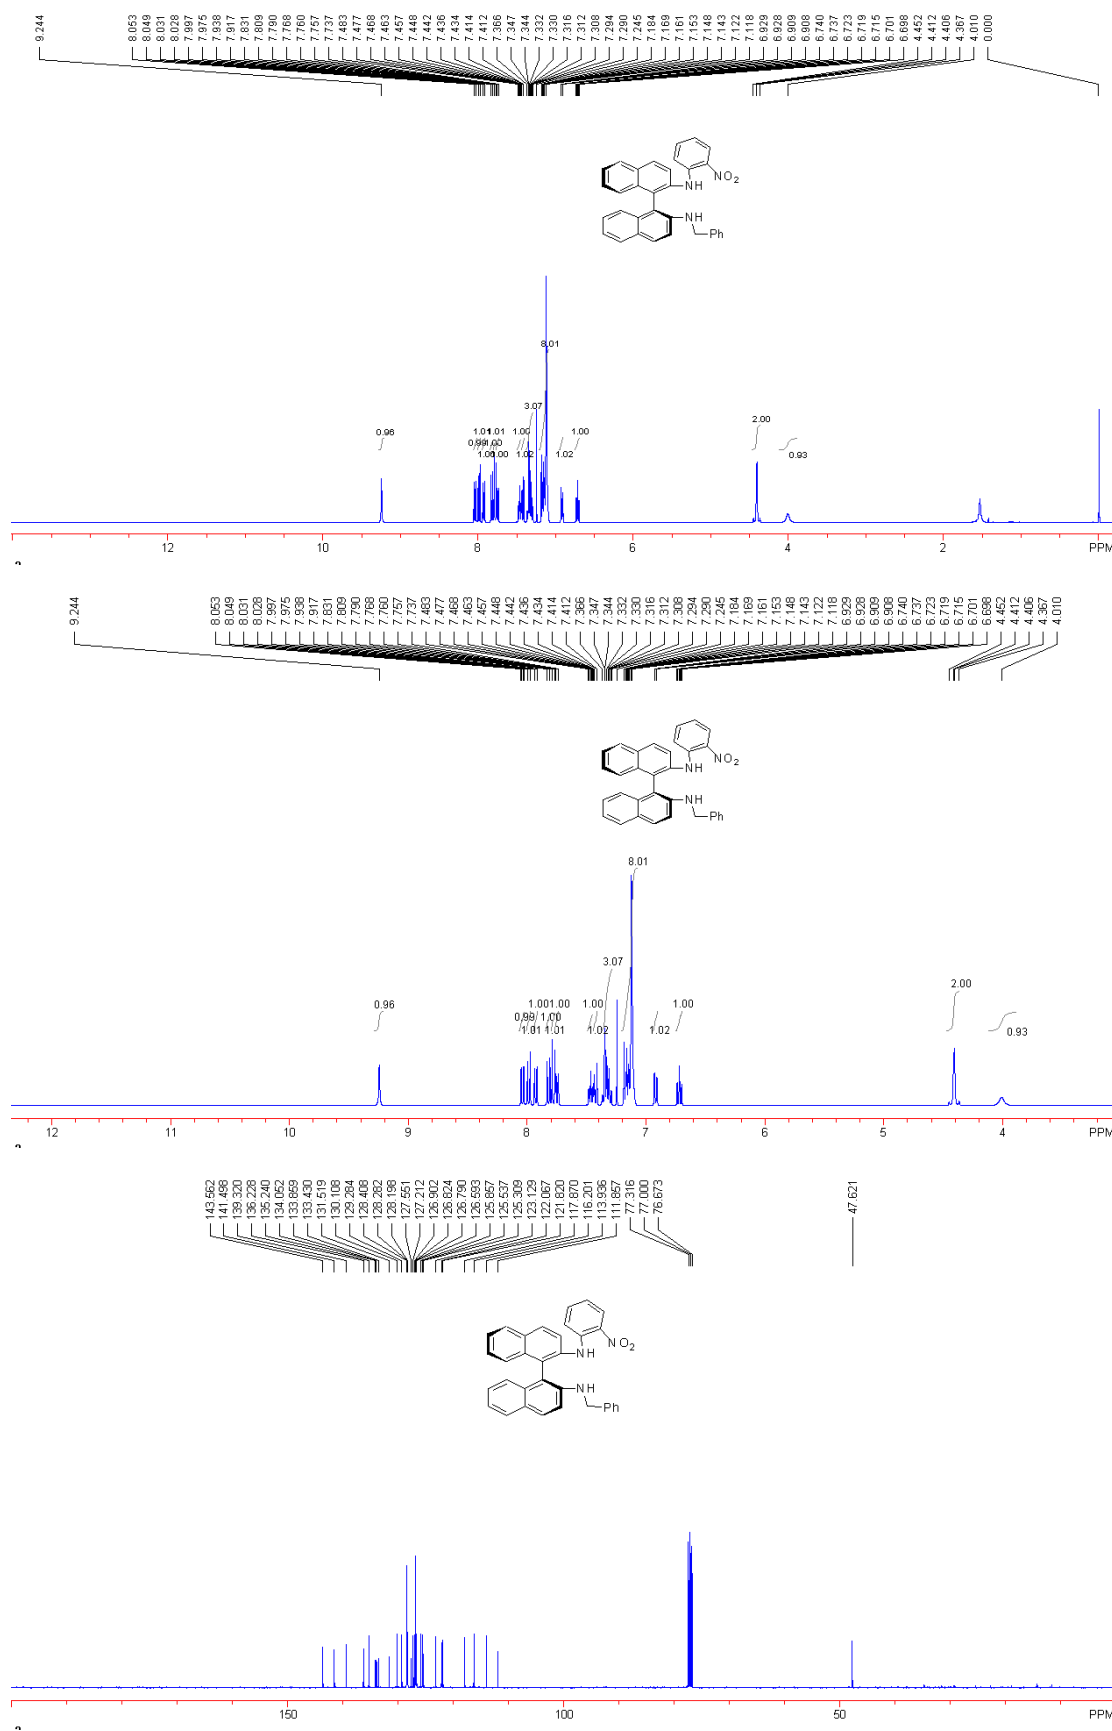

Compound (aS)-41

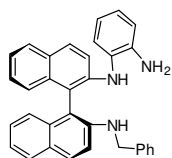

White solid; m.p. 117.2-118.5 °C.  $[\alpha]_D^{20} = -124$  ( $c$  0.125,  $\text{CHCl}_3$ ). IR (direct irradiation)  $\nu$  3415, 3370, 3051, 2956, 2923, 2853, 1615, 1594, 1497, 1454, 1415, 1338, 1294, 1247, 1213, 1149, 1024, 970, 810, 741, 696  $\text{cm}^{-1}$ .  $^1\text{H}$  NMR (400 MHz,  $\text{CDCl}_3$ , TMS)  $\delta$  3.40-4.46 (m, 3H, NH+NH<sub>2</sub>), 4.38 (d,  $J = 16.0$  Hz, 1H), 4.44 (d,  $J = 16.0$  Hz, 1H), 5.07 (s, 1H), 6.66-6.70 (m, 2H), 6.98 (dt,  $J = 1.2, 7.6$  Hz, 1H), 7.03 (d,  $J = 8.0$  Hz, 1H), 7.10-7.27 (m, 13H), 7.75-7.82 (m, 4H);  $^{13}\text{C}$  NMR (100 MHz,  $\text{CDCl}_3$ , TMS)  $\delta$  47.5, 111.8, 113.4, 114.1, 115.7, 116.1, 118.7, 122.1, 122.7, 123.5, 124.2, 126.4, 126.78, 126.81, 126.90, 126.94, 126.96, 127.6, 127.8, 128.2, 128.3, 128.5, 128.7, 129.5, 129.9, 133.8, 139.6, 142.7, 143.1, 144.2. LRMS (ESI)  $m/e$  466.2 [ $\text{M}^+\text{H}$ ]; HRMS (ESI) calcd for  $[\text{C}_{33}\text{H}_{27}\text{N}_3+\text{H}]$  requires 466.2283, found 466.2279 [ $\text{M}^+\text{H}$ ].

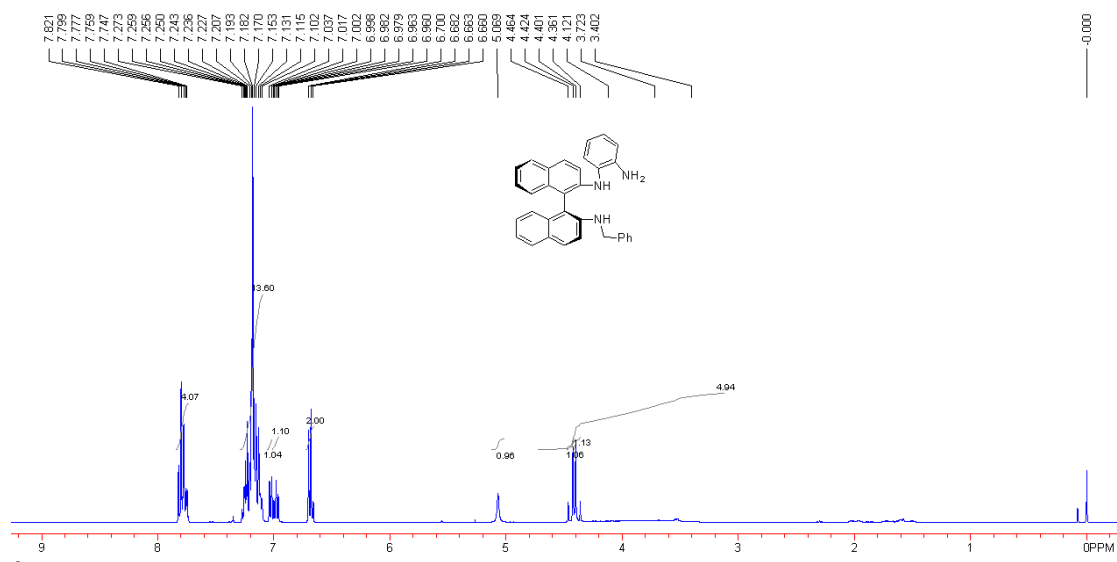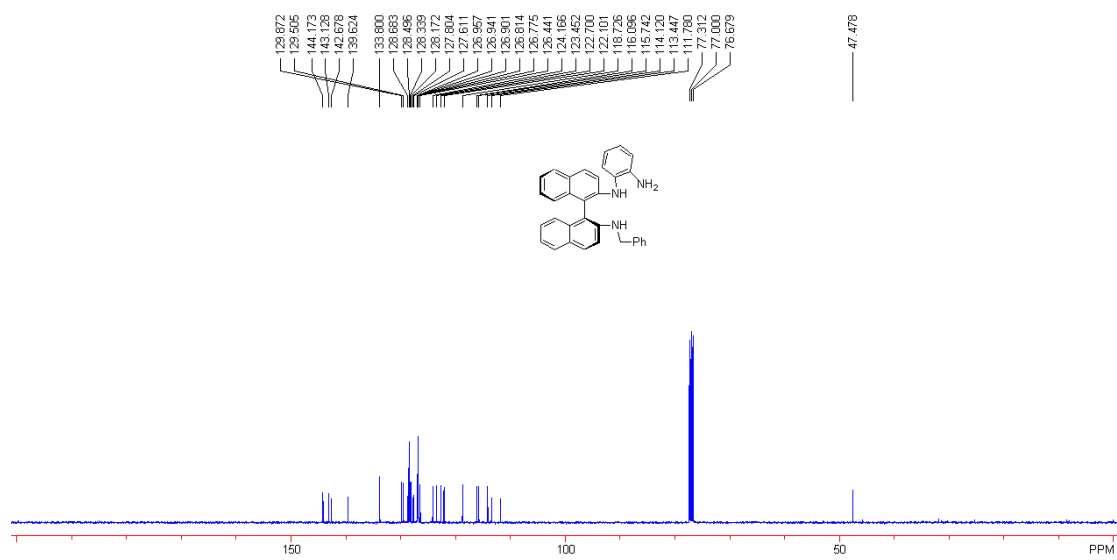

Compound (aS)-**42**

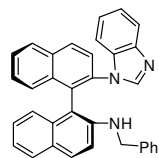

White solid; m.p. 106.5-107.5 °C (dec.).  $[\alpha]_D^{20} = -50$  (*c* 0.25, CHCl<sub>3</sub>). IR (direct irradiation)  $\nu$  3054, 2954, 2923, 2853, 1616, 1597, 1487, 1453, 1426, 1343, 1285, 1235, 1151, 810, 739, 696 cm<sup>-1</sup>. <sup>1</sup>H NMR (400 MHz, CDCl<sub>3</sub>, TMS)  $\delta$  3.84 (br, 1H), 4.06 (d, *J* = 15.2 Hz, 1H), 4.15 (dd, *J* = 4.4, 15.6 Hz, 1H), 6.81 (d, *J* = 6.8 Hz, 2H), 6.90-6.93 (m, 2H), 7.09-7.12 (m, 5H), 7.19-7.26 (m, 2H), 7.38-7.44 (m, 3H), 7.55 (s, 1H), 7.61 (ddd, *J* = 2.0, 6.0, 8.0 Hz, 1H), 7.64-7.72 (m, 3H), 7.79 (d, *J* = 8.8 Hz, 1H), 8.05 (d, *J* = 8.0 Hz, 1H), 8.17 (d, *J* = 8.8 Hz, 1H); <sup>13</sup>C NMR (100 MHz, CDCl<sub>3</sub>, TMS)  $\delta$  47.7, 109.9, 111.3, 113.7, 120.3, 122.0, 122.4, 123.1, 123.4, 124.5, 126.6, 126.8, 126.9, 127.0, 127.2, 127.3, 127.7, 128.37, 128.44, 130.1, 130.2, 130.3, 133.5, 133.6, 133.9, 134.1, 134.3, 139.0, 142.9, 143.1, 143.7. LRMS (ESI) *m/e* 476.2 [M<sup>+</sup>+H]; HRMS (ESI) calcd for [C<sub>34</sub>H<sub>25</sub>N<sub>3</sub>+H] requires 476.2127, found 476.2128 [M<sup>+</sup>+H].

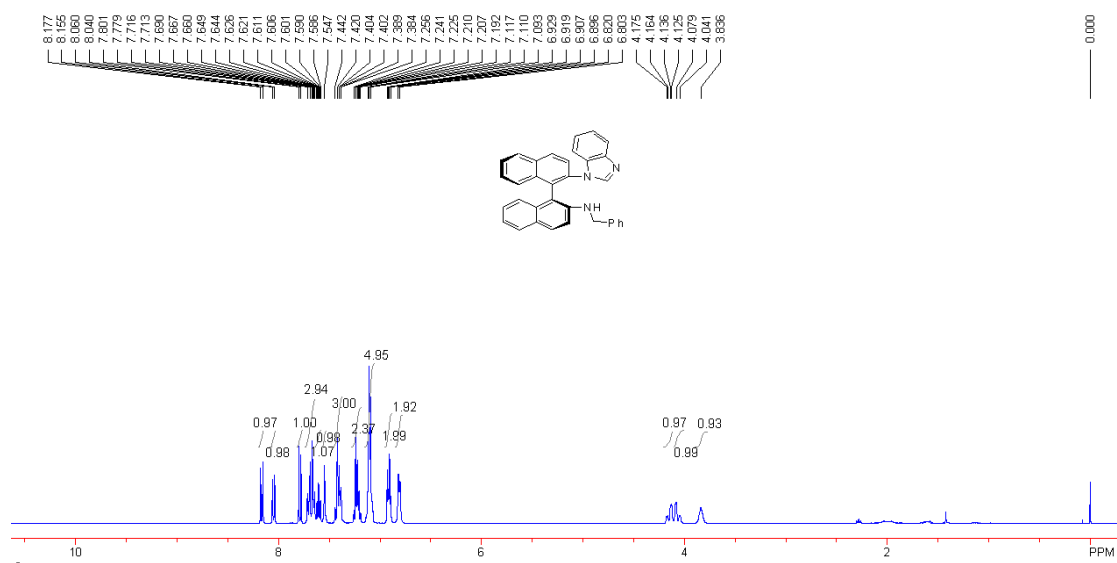

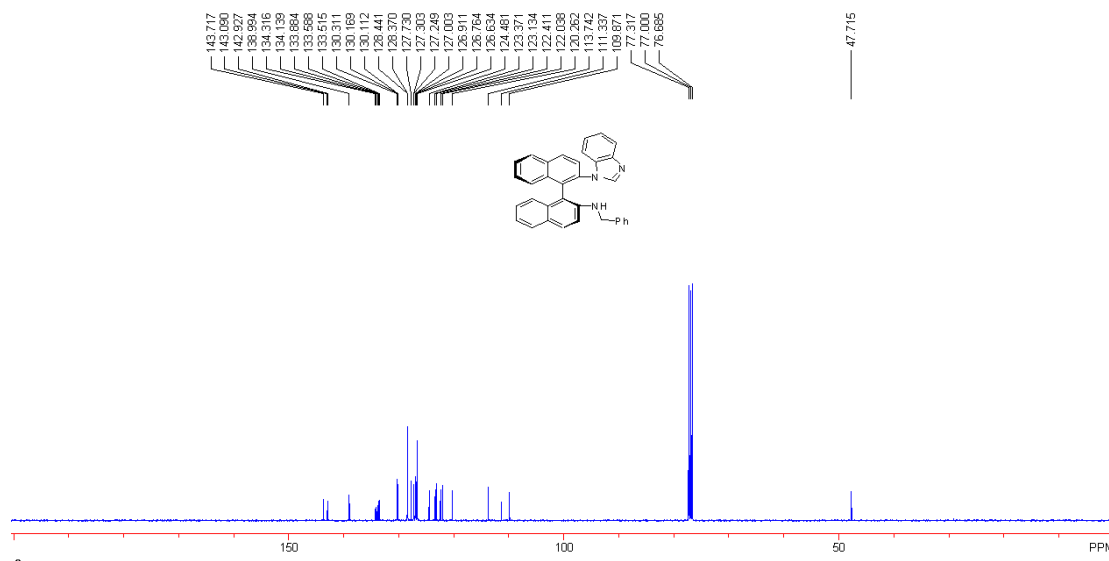

### Complex (aS)-8

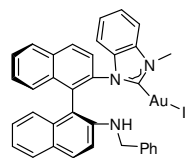

Pale yellow solid; m.p. 198.3-199.8 °C (dec.).  $[\alpha]_D^{20} = +20$  (*c* 0.25, CHCl<sub>3</sub>).

IR (direct irradiation)  $\nu$  3399, 2955, 2922, 2852, 1710, 1617, 1598, 1494, 1454, 1392, 1343, 1295, 1240, 1081, 827, 808, 740, 696 cm<sup>-1</sup>. <sup>1</sup>H NMR (400

MHz, CDCl<sub>3</sub>, TMS)  $\delta$  3.95 (s, 3H), 4.38 (dd, *J* = 6.0, 16.0 Hz, 1H), 4.56 (t, *J* = 5.6 Hz, 1H), 4.62 (dd, *J* = 5.6, 16.0 Hz, 1H), 6.76 (d, *J* = 8.8 Hz, 1H), 6.85 (t, *J* = 7.6 Hz, 1H), 6.99 (d, *J* = 8.4 Hz, 1H), 7.02-7.05 (m, 4H), 7.08-7.17 (m, 5H), 7.23 (d, *J* = 8.4 Hz, 1H), 7.42-7.45 (m, 3H), 7.49 (d, *J* = 8.0 Hz, 1H), 7.67 (ddd, *J* = 2.8, 5.6, 8.0 Hz, 1H), 7.71 (d, *J* = 8.4 Hz, 1H), 8.10 (d, *J* = 8.4 Hz, 1H), 8.20 (d, *J* = 8.4 Hz, 1H). LRMS (ESI) *m/e* 686.2 [M<sup>+</sup>-I]; HRMS (ESI) calcd for [C<sub>35</sub>H<sub>27</sub>N<sub>3</sub>IAu-I] requires 686.1870, found 686.1844 [M<sup>+</sup>-I].

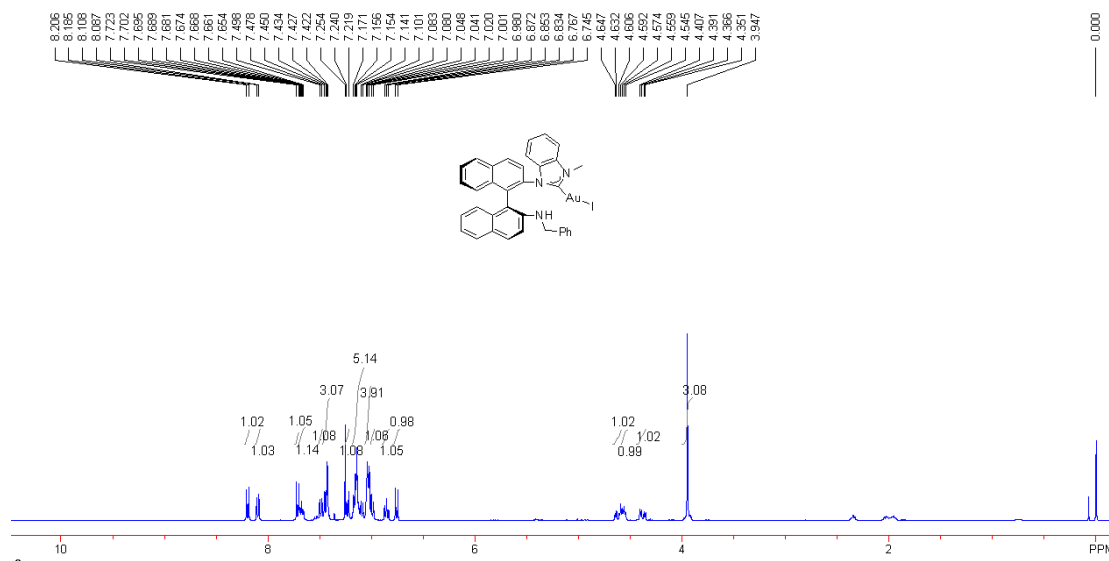

### (9) General Procedure for the Synthesis of Gold(I) Complex **9**

To the suspension of **40** (248 mg, 0.5 mmol) and  $K_2CO_3$  (104 mg, 0.75 mmol) in dry  $CH_3CN$  (12 mL) was added  $BnBr$  (0.6 mL, 5 mmol) and the resulting mixture was refluxed at 85 °C for 35 h. After cooling to room temperature, the reaction was quenched with water and then extracted with ethyl acetate for three times. The combined organic phases were dried over anhydrous  $Na_2SO_4$ , concentrated under reduced pressure, and then purified by a silica gel flash column chromatography (eluent: petroleum ether/EtOAc: 150/1) to give **44** as a red solid in > 99% yield.

A mixture of **44** (398 mg, 0.68 mmol) and 10%  $Pd/C$  (68 mg) in EtOAc (15 mL) was stirred under  $H_2$  atmosphere (1 atm) at 60 °C for 50 h. After cooling to room temperature, the suspension was filtered through Celite to remove  $Pd/C$ . Then volatiles were removed under reduced pressure and the residue was purified by a silica gel flash column chromatography (eluent: petroleum ether/EtOAc, 25/1) to give **45** as a pale yellow solid in 64% yield.

Compound **45** (232 mg, 0.41 mmol) and triethyl orthoformate (10 mL) containing a catalytic amount of  $TsOH$  (9 mg) were heated at 100 °C for 9 h. After removing triethyl orthoformate under reduced pressure, the residue was purified by a silica gel flash column chromatography (eluent: petroleum ether/EtOAc, 8/1) to give **46** as a white solid in 85% yield.

Compound **46** (113 mg, 0.2 mmol) and  $CH_3I$  (0.25 mL, 4 mmol) in  $CH_3CN$  (4 mL) were stirred under reflux for 60 h. After cooling to room temperature, volatiles were removed under

reduced pressure and the obtained solid **47** was used for the next step without further purification.

Under argon atmosphere, to a flame-dried Schlenk tube equipped with a septum and stirring bar were added NHC precursor **47** (71 mg, 0.1 mmol), NaOAc (17 mg, 0.2 mmol) and [(Me<sub>2</sub>S)AuCl] (30 mg, 0.1 mmol) followed by the addition of dry CH<sub>3</sub>CN (5 mL) as the solvent. After refluxing at 85 °C for 24 h, the reaction mixture was cooled to room temperature and filtered through Celite. Then volatiles were removed under reduced pressure and the residue was purified by a silica gel flash column chromatography (eluent: petroleum ether/EtOAc, 6/1) to give complex **9** as a white solid in 66% yield (Scheme S10).

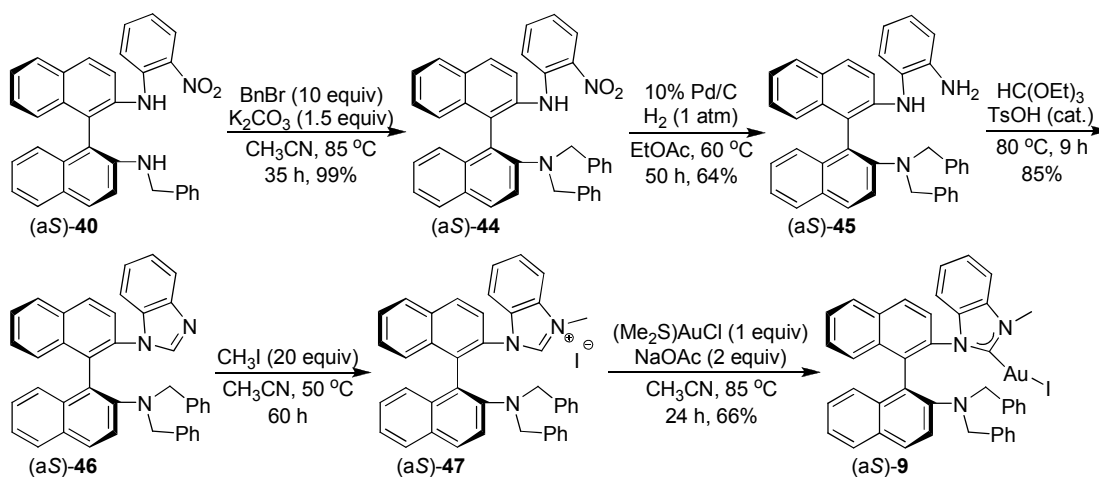

**Scheme S10**

#### Compound (aS)-44

Red solid; m.p. 90.2-91.5 °C (dec.). [ $\alpha$ ]<sub>D</sub><sup>20</sup> = +12 (*c* 0.125, CHCl<sub>3</sub>). IR (direct irradiation)  $\nu$  3330, 3059, 3027, 2962, 2923, 2849, 1611, 1592, 1571, 1494, 1444, 1413, 1339, 1248, 1210, 1146, 1106, 1076, 1027, 960, 812, 737, 697 cm<sup>-1</sup>. <sup>1</sup>H NMR (400 MHz, CDCl<sub>3</sub>, TMS)  $\delta$  3.89 (d, *J* = 14.4 Hz, 2H), 4.03 (d, *J* = 14.8 Hz, 2H), 6.60 (ddd, *J* = 1.2, 6.8, 8.4 Hz, 1H), 6.79 (d, *J* = 6.4 Hz, 4H), 7.06-7.28 (m, 12H), 7.33-7.39 (m, 2H), 7.44 (ddd, *J* = 2.0, 6.0, 8.0 Hz, 1H), 7.74 (d, *J* = 8.8 Hz, 1H), 7.86 (d, *J* = 8.0 Hz, 1H), 7.89 (d, *J* = 8.4 Hz, 1H), 7.93-7.97 (m, 3H), 9.34 (s, 1H); <sup>13</sup>C NMR (100 MHz, CDCl<sub>3</sub>, TMS)  $\delta$  55.6, 116.1, 117.7, 122.0, 122.6, 124.6, 124.7, 125.3, 125.5, 126.5, 126.75, 126.80, 127.0, 127.9, 128.1, 128.2, 128.67, 128.72, 128.8, 129.3, 130.5, 131.5, 133.5, 133.6, 134.1, 135.0,

135.2, 137.5, 141.6, 148.9. LRMS (ESI)  $m/e$  586.2  $[M^+ + H]$ ; HRMS (ESI) calcd for  $[C_{40}H_{31}N_3O_2 + H]$  requires 586.2495, found 586.2496  $[M^+ + H]$ .

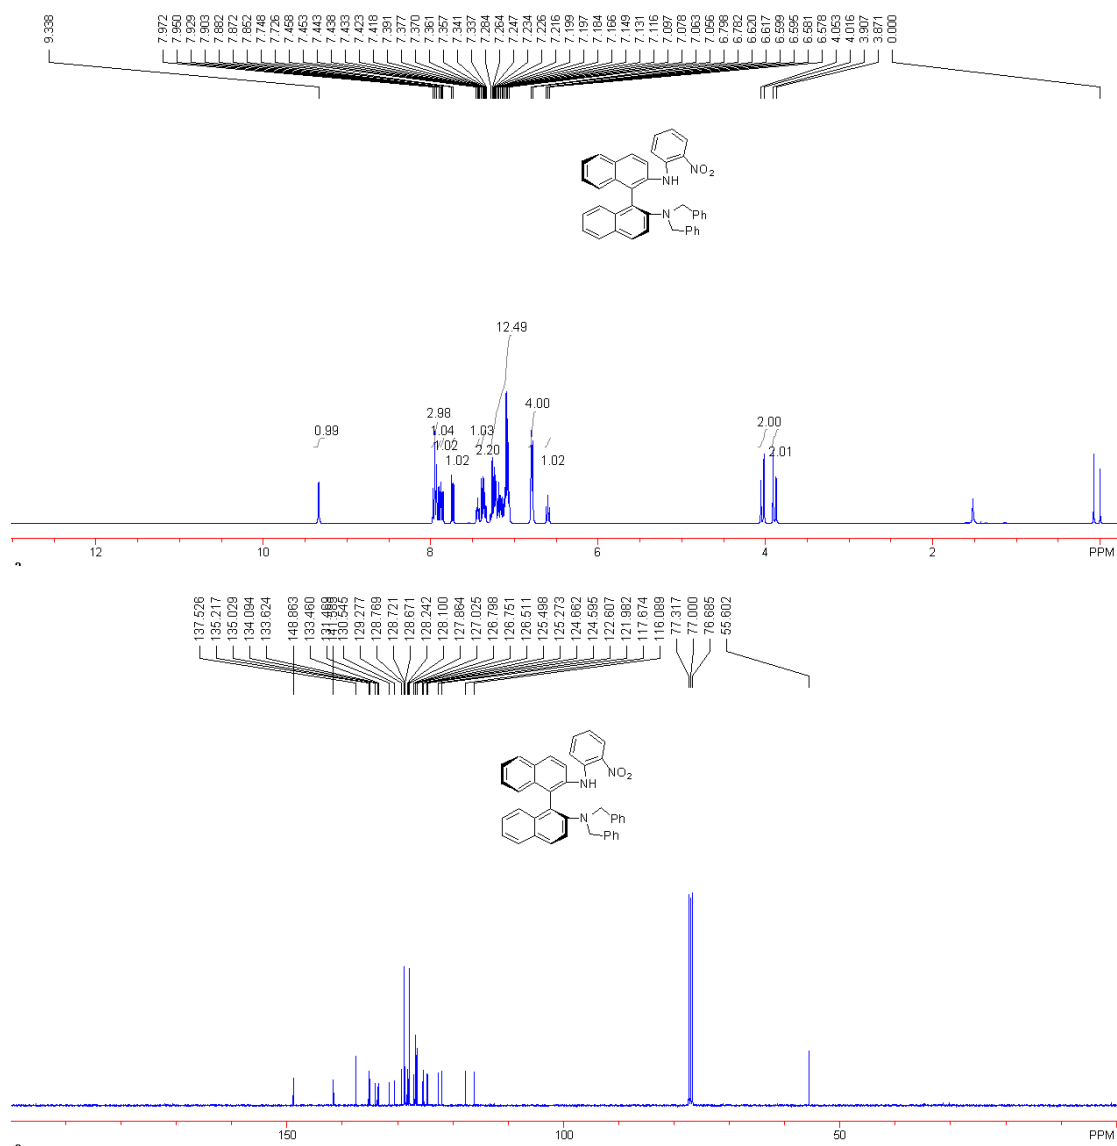

### Compound (aS)-45

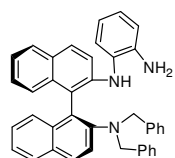

Pale yellow solid; m.p. 114.5-115.0 °C (dec.).  $[\alpha]_D^{20} = +17$  ( $c$  0.25, CHCl<sub>3</sub>). IR (direct irradiation)  $\nu$  3458, 3372, 3056, 3026, 2923, 2850, 1615, 1592, 1502, 1453, 1414, 1341, 1297, 1210, 1146, 1071, 1026, 958, 812, 742, 698 cm<sup>-1</sup>. <sup>1</sup>H NMR (400 MHz, CDCl<sub>3</sub>, TMS)  $\delta$  3.43 (br, 2H), 4.03 (d,  $J$  = 14.8 Hz, 2H), 4.11 (d,  $J$  = 14.8 Hz, 2H), 5.01 (s, 1H), 6.58-6.62 (m, 2H), 6.88-6.93 (m, 6H), 7.05-7.19 (m, 9H), 7.24-7.28 (m, 2H), 7.34-7.37 (m, 2H), 7.40 (d,  $J$  = 9.2 Hz, 1H), 7.78 (d,  $J$  = 9.2 Hz, 1H), 7.81 (d,  $J$  = 8.4 Hz, 1H),

7.84-7.89 (m, 2H);  $^{13}\text{C}$  NMR (100 MHz,  $\text{CDCl}_3$ , TMS)  $\delta$  55.8, 115.7, 116.2, 117.5, 118.8, 122.6, 122.8, 124.6, 124.8, 125.1, 125.2, 125.97, 125.99, 126.5, 126.8, 127.98, 128.03, 128.2, 128.7, 128.8, 128.9, 129.0, 130.7, 133.7, 133.9, 138.0, 141.3, 142.6, 149.7. LRMS (ESI)  $m/e$  556.3  $[\text{M}^+\text{H}]$ ; HRMS (ESI) calcd for  $[\text{C}_{40}\text{H}_{33}\text{N}_3\text{H}]$  requires 556.2753, found 556.2750  $[\text{M}^+\text{H}]$ .

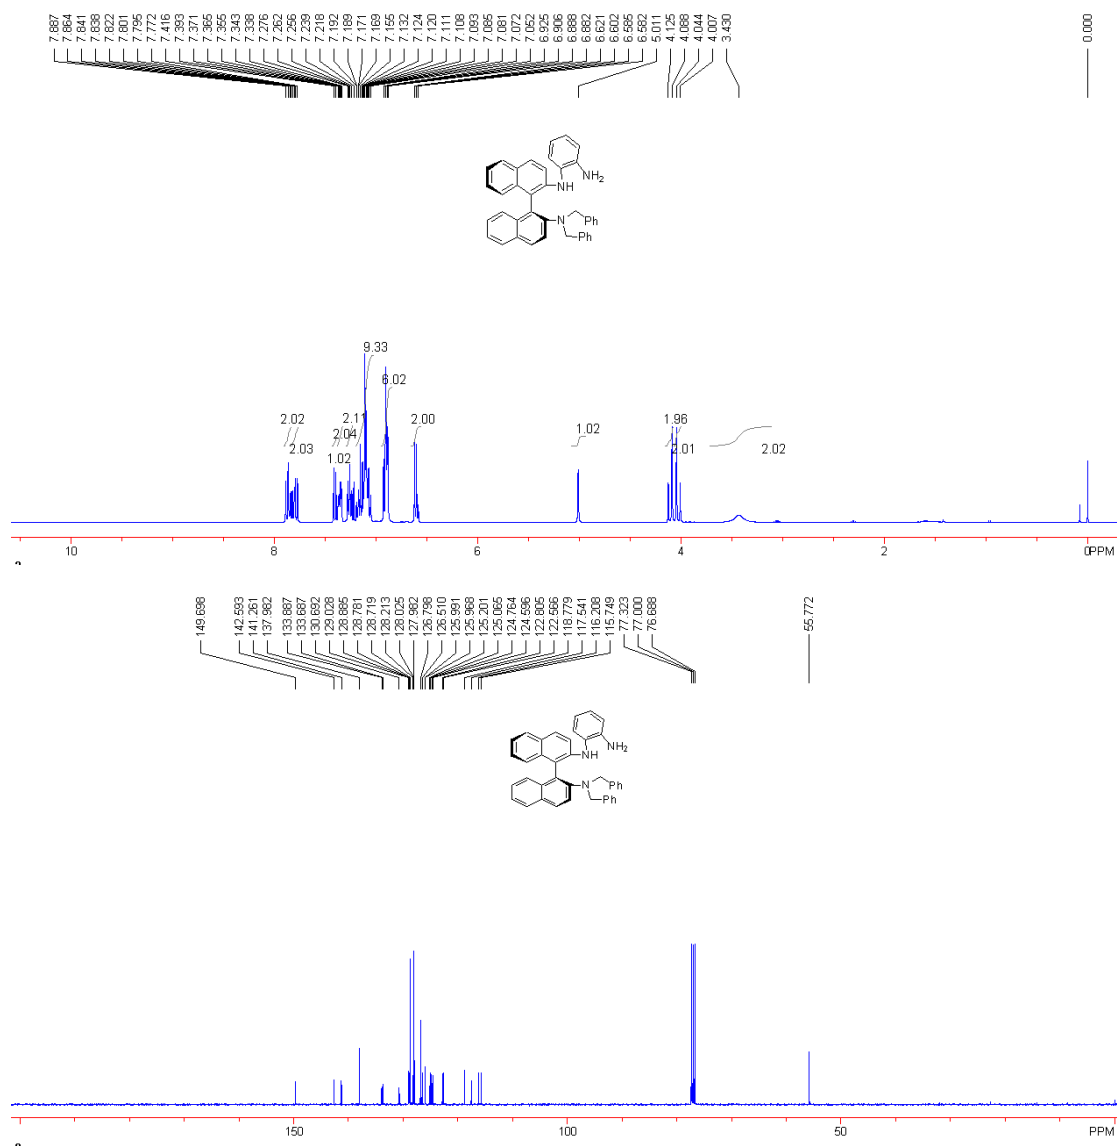

#### Compound (aS)-46

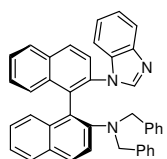

White solid; m.p. 53.8-55.6  $^{\circ}\text{C}$  (dec.).  $[\alpha]_{\text{D}}^{20} = -49$  (c 0.25,  $\text{CHCl}_3$ ). IR (direct irradiation)  $\nu$  3057, 3028, 2960, 2923, 2853, 1593, 1488, 1452, 1363, 1283, 1260, 1235, 1209, 1192, 1081, 1018, 963, 799, 740, 697  $\text{cm}^{-1}$ .  $^1\text{H}$  NMR (400

MHz, CDCl<sub>3</sub>, TMS)  $\delta$  3.67 (s, 4H), 6.51 (d,  $J$  = 7.2 Hz, 4H), 6.97-7.01 (m, 4H), 7.03-7.08 (m, 3H), 7.12-7.27 (m, 7H), 7.34-7.37 (m, 2H), 7.50-7.54 (m, 1H), 7.64 (d,  $J$  = 8.0 Hz, 1H), 7.78 (d,  $J$  = 8.8 Hz, 2H), 7.82 (d,  $J$  = 8.0 Hz, 1H), 8.02 (d,  $J$  = 8.4 Hz, 1H), 8.13 (d,  $J$  = 8.8 Hz, 1H); <sup>13</sup>C NMR (100 MHz, CDCl<sub>3</sub>, TMS)  $\delta$  56.4, 111.0, 120.1, 122.5, 123.06, 123.11, 124.1, 124.6, 124.7, 125.2, 126.6, 126.7, 127.1, 127.3, 127.5, 127.8, 128.1, 128.3, 128.4, 129.4, 129.6, 130.1, 131.8, 132.8, 133.0, 134.0, 134.1, 135.2, 137.7, 142.8, 143.1, 148.4. LRMS (ESI)  $m/e$  566.3 [M<sup>+</sup>+H]; HRMS (ESI) calcd for [C<sub>41</sub>H<sub>31</sub>N<sub>3</sub>+H] requires 566.2596, found 566.2590 [M<sup>+</sup>+H].

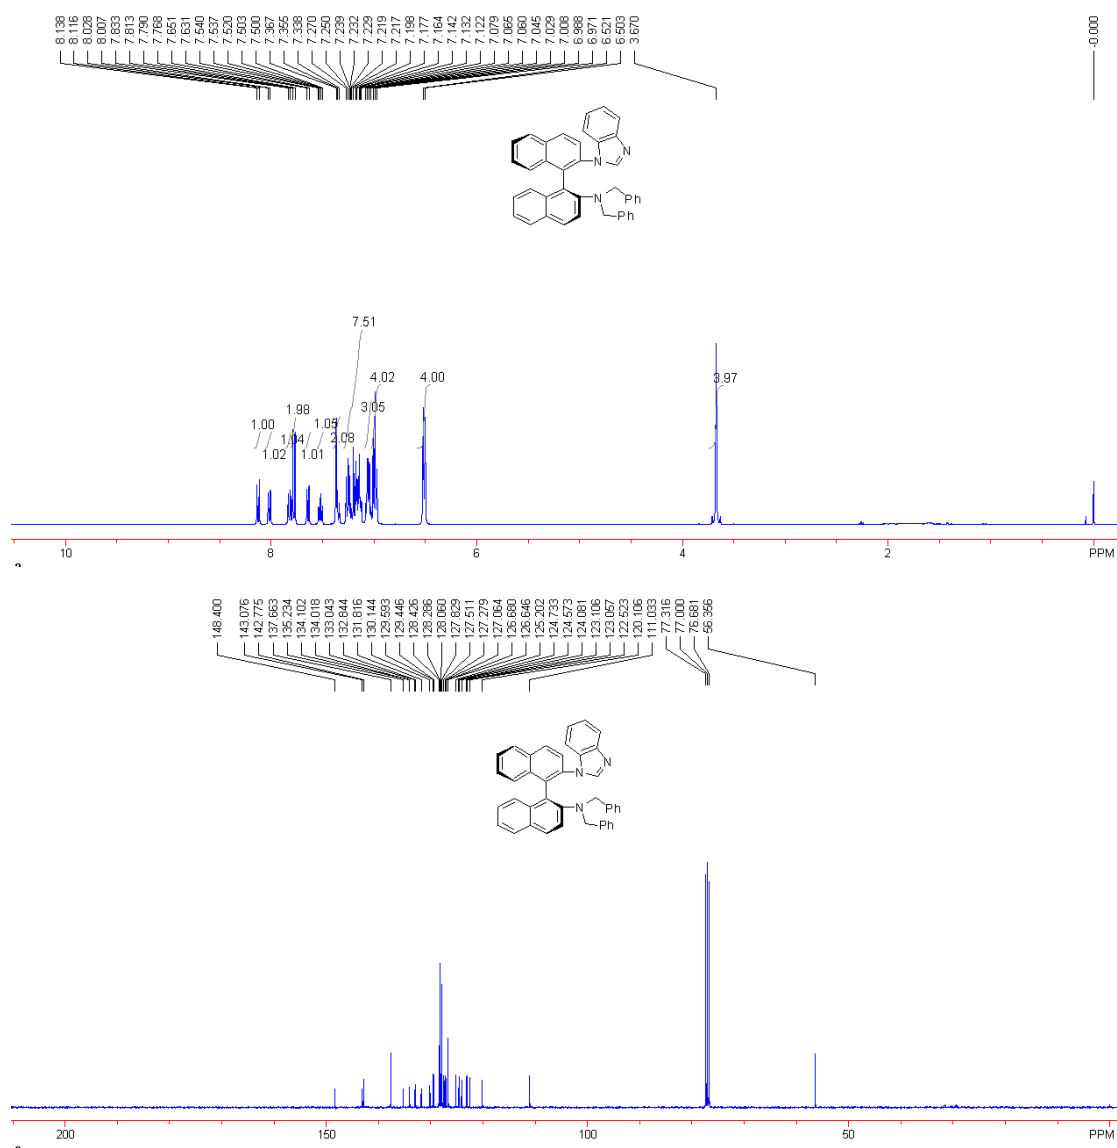

Complex (aS)-9

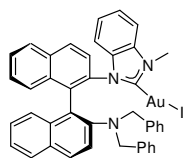

White solid; m.p. 240.8-241.8 °C (dec.).  $[\alpha]_D^{20} = +51$  ( $c$  0.25,  $\text{CHCl}_3$ ). IR (direct irradiation)  $\nu$  3059, 3023, 2923, 2852, 2814, 1618, 1596, 1505, 1450, 1392, 1353, 1216, 1150, 1124, 1098, 1070, 971, 942, 824, 807, 738, 699, 684  $\text{cm}^{-1}$ .  $^1\text{H}$  NMR (400 MHz,  $\text{CDCl}_3$ , TMS)  $\delta$  3.75 (s, 3H), 4.32 (s, 4H), 6.58 (d,  $J = 7.2$  Hz, 4H), 6.67 (t,  $J = 8.4$  Hz, 1H), 6.73 (d,  $J = 8.0$  Hz, 1H), 6.82 (d,  $J = 9.2$  Hz, 1H), 6.89 (t,  $J = 7.2$  Hz, 4H), 7.00 (t,  $J = 7.2$  Hz, 2H), 7.15-7.20 (m, 2H), 7.25-7.34 (m, 5H), 7.42 (d,  $J = 9.2$  Hz, 1H), 7.51 (t,  $J = 7.2$  Hz, 1H), 7.65-7.67 (m, 1H), 7.74 (d,  $J = 8.8$  Hz, 1H), 8.00 (d,  $J = 8.0$  Hz, 1H), 8.14 (d,  $J = 8.8$  Hz, 1H). LRMS (ESI)  $m/e$  776.2  $[\text{M}^+ - \text{I}]$ ; HRMS (ESI) calcd for  $[\text{C}_{42}\text{H}_{33}\text{N}_3\text{IAu} - \text{I}]$  requires 776.2340, found 776.2352  $[\text{M}^+ - \text{I}]$ .

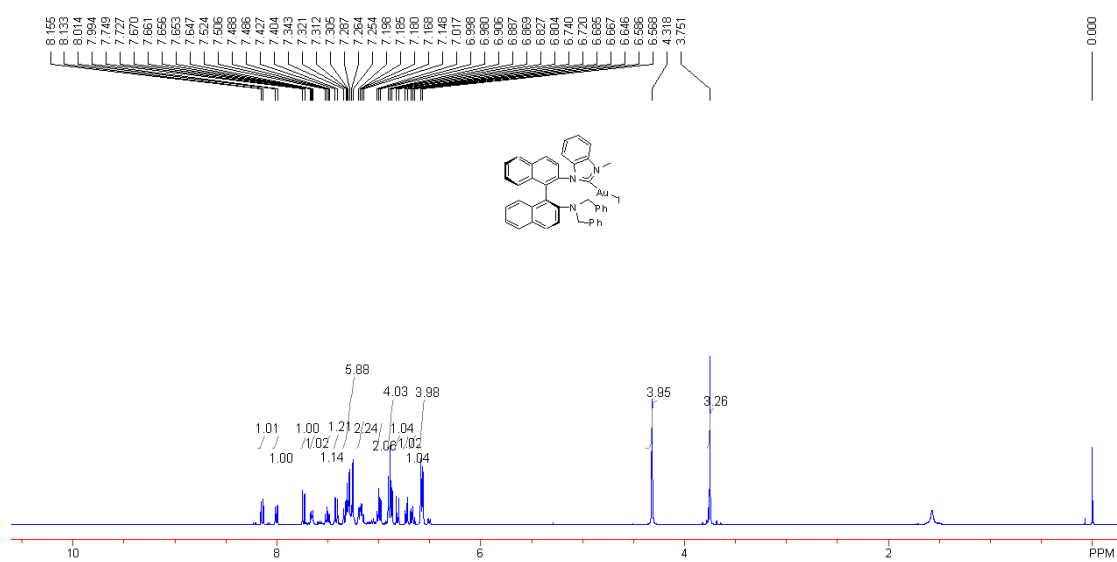

## (10) General Procedure for the Synthesis of Gold(I) Complexes 10 and 11

Chiral imine compounds **48** and **50** were prepared according to our previously reported procedures with compound **24** as the starting material.<sup>[2b]</sup>

Compound **48** (98 mg, 0.2 mmol) or **50** (95 mg, 0.2 mmol) and  $\text{CH}_3\text{I}$  (0.25 mL, 4 mmol) in  $\text{CH}_3\text{CN}$  (4 mL) were refluxed for 11 h or 20 h. After cooling to room temperature, volatiles were removed under reduced pressure and the respectively obtained solid **49** and **51** was used for the next step without further purification.

Under argon atmosphere, to a flame-dried Schlenk tube equipped with a septum and stirring bar were added NHC precursor **49** (63 mg, 0.1 mmol), NaOAc (13 mg, 0.15 mmol)

and  $[(\text{Me}_2\text{S})\text{AuCl}]$  (30 mg, 0.1 mmol) followed by the addition of dry  $\text{CH}_3\text{CN}$  (5 mL) as the solvent. After refluxing at  $85\text{ }^\circ\text{C}$  for 48 h, the reaction mixture was cooled to room temperature and filtered through Celite. Then volatiles were removed under reduced pressure and the residue was purified by a silica gel flash column chromatography (eluent: petroleum ether/EtOAc, 4/1; containing minor  $\text{NEt}_3$ ) to give complex **10** as a yellow solid in 66% yield (Scheme S11).

Under argon atmosphere, to a flame-dried Schlenk tube equipped with a septum and stirring bar were added NHC precursor **51** (62 mg, 0.1 mmol), NaOAc (17 mg, 0.2 mmol) and  $[(\text{Me}_2\text{S})\text{AuCl}]$  (30 mg, 0.1 mmol) followed by the addition of dry  $\text{CH}_3\text{CN}$  (5 mL) as the solvent. After refluxing at  $85\text{ }^\circ\text{C}$  for 20 h, the reaction mixture was cooled to room temperature and filtered through Celite. Then volatiles were removed under reduced pressure and the residue was purified by a silica gel flash column chromatography (eluent: petroleum ether/EtOAc, 4/1; containing minor  $\text{NEt}_3$ ) to give complex **11** as a pale yellow solid in 41% yield (Scheme S11).

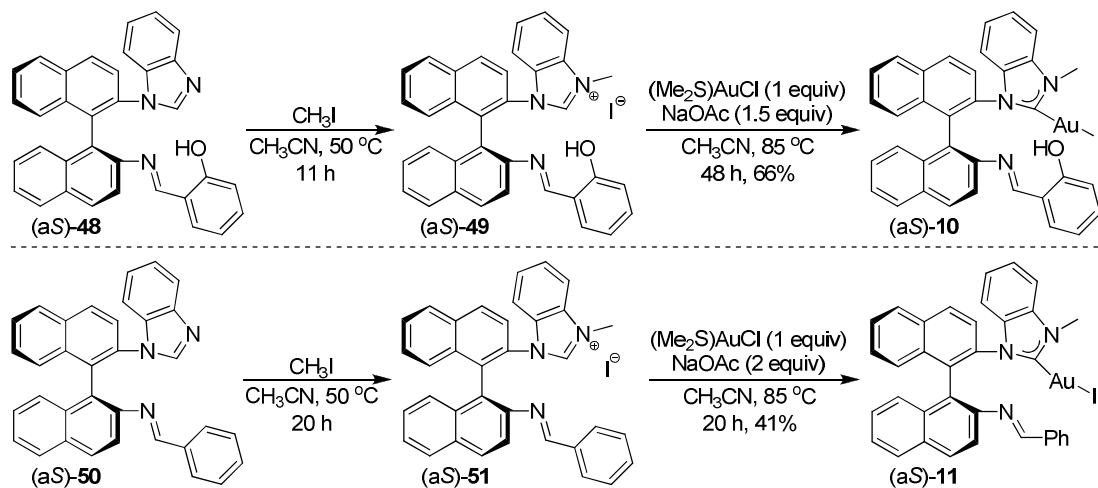

**Scheme S11**

**Compound (aS)-48<sup>[2b]</sup>**

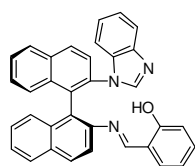

Yellow solid; m.p.  $133\text{--}135\text{ }^\circ\text{C}$ .  $[\alpha]_{\text{D}}^{20} = -197$  ( $c$  0.25,  $\text{CHCl}_3$ ). IR (direct irradiation)  $\nu$  3054, 2924, 2852, 1607, 1568, 1487, 1452, 1281, 1235, 1203, 1189, 1150, 818, 799, 742,  $696\text{ cm}^{-1}$ .  $^1\text{H}$  NMR (400 MHz,  $\text{CDCl}_3$ , TMS)  $\delta$  6.67–6.74 (m, 3H), 6.86 (d,  $J = 6.8\text{ Hz}$ , 1H), 7.00 (t,  $J = 7.6\text{ Hz}$ , 1H), 7.17–7.19 (m, 3H),

7.26-7.29 (m, 3H), 7.35-7.38 (m, 3H), 7.47-7.48 (m, 1H), 7.56 (d,  $J = 7.6$  Hz, 1H), 7.64 (d,  $J = 8.8$  Hz, 1H), 7.74-7.78 (m, 2H), 7.97-7.99 (m, 2H), 8.12 (d,  $J = 8.8$  Hz, 1H), 11.97 (s, 1H);  $^{13}\text{C}$  NMR (100 MHz,  $\text{CDCl}_3$ , TMS)  $\delta$  110.4, 116.6, 116.7, 118.6, 119.0, 119.5, 122.0, 122.8, 124.2, 125.8, 125.9, 126.6, 126.9, 127.2, 127.3, 127.4, 128.3, 128.4, 130.0, 130.5, 131.5, 132.1, 132.2, 132.8, 132.9, 133.0, 133.3, 133.7, 134.1, 142.4, 142.6, 143.5, 160.4, 162.5. LRMS (ESI)  $m/e$  490.2  $[\text{M}^+\text{H}]$ ; HRMS (ESI) calcd for  $[\text{C}_{34}\text{H}_{23}\text{N}_3\text{O}+\text{H}]$  requires 490.1919, found 490.1902  $[\text{M}^+\text{H}]$ .

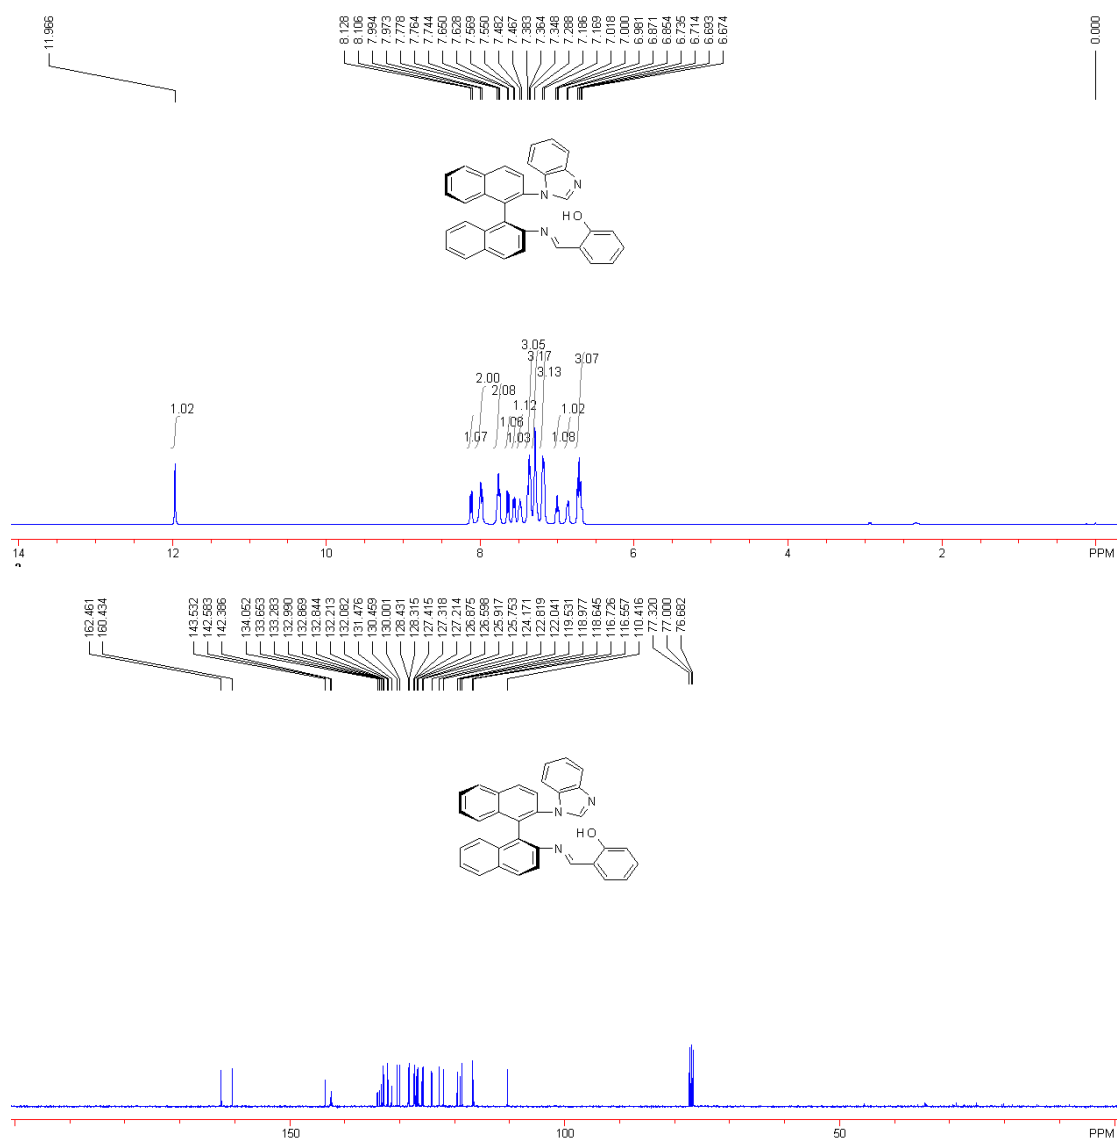

### Complex (aS)-**10**

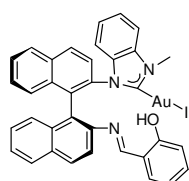

Yellow solid; m.p. 150.0-151.2  $^{\circ}\text{C}$  (dec.).  $[\alpha]_{\text{D}}^{20} = -49$  ( $c$  0.25,  $\text{CHCl}_3$ ). IR

(direct irradiation)  $\nu$  3055, 2921, 2851, 2814, 1710, 1606, 1571, 1493, 1461, 1390, 1279, 1239, 1203, 1188, 1151, 1081, 964, 903, 859, 818, 744, 692  $\text{cm}^{-1}$ .  $^1\text{H}$  NMR (400 MHz,  $\text{CDCl}_3$ , TMS)  $\delta$  3.76 (s, 3H), 6.68 (ddd,  $J = 2.8, 6.0, 8.4$  Hz, 1H), 6.78 (d,  $J = 8.0$  Hz, 1H), 6.90 (dt,  $J = 1.2, 8.0$  Hz, 1H), 6.97 (d,  $J = 8.0$  Hz, 1H), 7.16-7.17 (m, 2H), 7.25-7.40 (m, 5H), 7.43-7.47 (m, 1H), 7.55 (dt,  $J = 1.2, 8.0$  Hz, 1H), 7.59-7.65 (m, 2H), 7.72 (d,  $J = 7.6$  Hz, 1H), 7.80 (d,  $J = 8.4$  Hz, 1H), 7.86 (d,  $J = 8.0$  Hz, 1H), 8.10 (d,  $J = 8.0$  Hz, 1H), 8.21 (d,  $J = 8.4$  Hz, 1H), 8.48 (s, 1H), 11.82 (s, 1H). LRMS (ESI)  $m/e$  700.2  $[\text{M}^+ - \text{I}]$ ; HRMS (ESI) calcd for  $[\text{C}_{35}\text{H}_{25}\text{N}_3\text{IOAu} - \text{I}]$  requires 700.1663, found 700.1666  $[\text{M}^+ - \text{I}]$ .

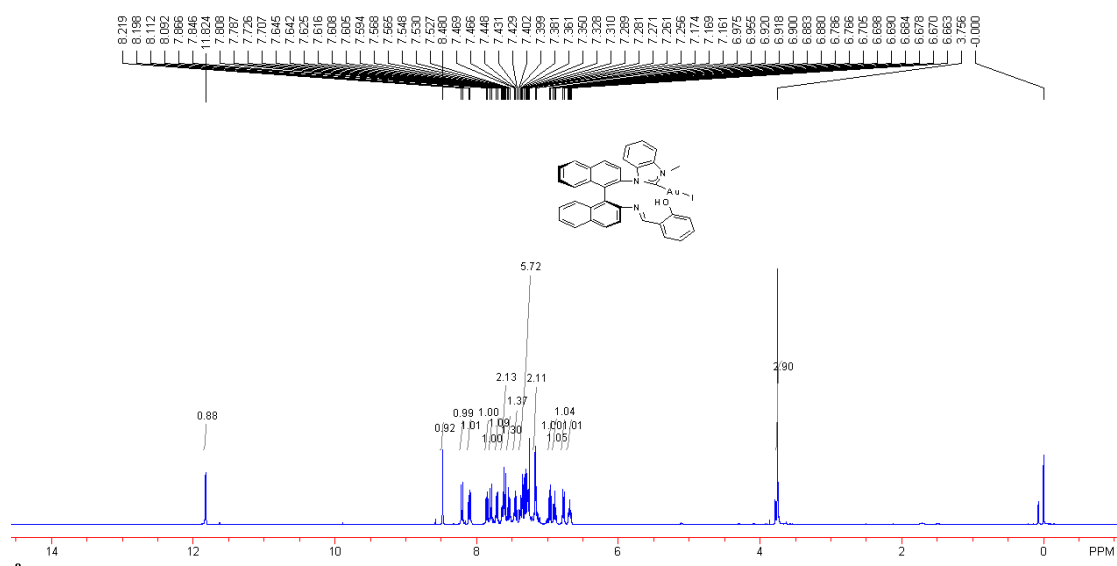

### Compound (aS)-**50**<sup>[2b]</sup>

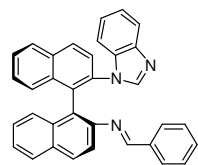

Yellow solid; m.p. 129-131  $^{\circ}\text{C}$ .  $[\alpha]_D^{20} = -209$  ( $c$  0.25,  $\text{CHCl}_3$ ). IR (direct irradiation)  $\nu$  3053, 2961, 2923, 2853, 1612, 1487, 1451, 1283, 1234, 1202, 1100, 1024, 815, 740, 691  $\text{cm}^{-1}$ .  $^1\text{H}$  NMR (400 MHz,  $\text{CDCl}_3$ , TMS)  $\delta$  6.82 (t,  $J = 7.6$  Hz, 1H), 7.06-7.16 (m, 3H), 7.21-7.37 (m, 10H), 7.52-7.56 (m, 2H), 7.60 (d,  $J = 8.4$  Hz, 1H), 7.64 (d,  $J = 8.4$  Hz, 1H), 7.82-7.88 (m, 3H), 8.01 (d,  $J = 8.4$  Hz, 1H), 8.09 (d,  $J = 8.4$  Hz, 1H) (containing minor of benzaldehyde);  $^{13}\text{C}$  NMR (100 MHz,  $\text{CDCl}_3$ , TMS)  $\delta$  110.7, 118.7, 119.7, 122.1, 122.8, 124.0, 124.9, 125.2, 125.5, 126.6, 127.1, 127.2, 128.1, 128.3, 128.4, 128.7, 129.4, 130.3, 131.1, 131.7, 132.0, 132.8, 133.1, 133.7, 134.1, 135.8, 142.9, 148.0, 160.7. LRMS (ESI)  $m/e$  474.2  $[\text{M}^+ + \text{H}]$ ; HRMS (ESI) calcd for  $[\text{C}_{34}\text{H}_{23}\text{N}_3 + \text{H}]$  requires

474.1970, found 474.1975 [M<sup>+</sup>+H].

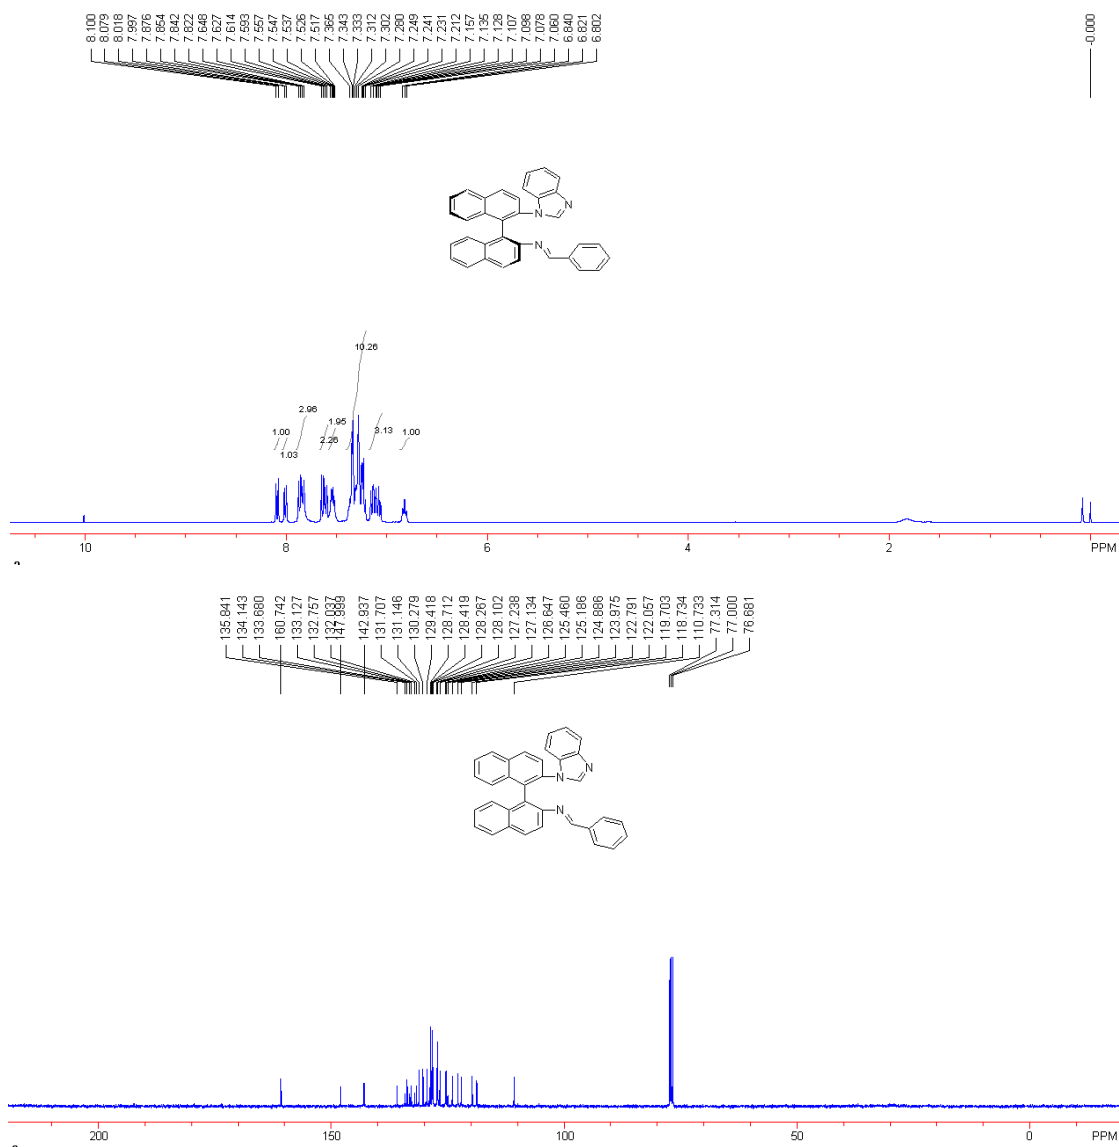

### Complex (aS)-**11**

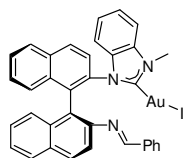

Pale yellow solid; m.p. 133.0-134.5 °C (dec.).  $[\alpha]_D^{20} = -42$  (*c* 0.25, CHCl<sub>3</sub>). IR (direct irradiation)  $\nu$  3055, 2923, 2853, 1700, 1611, 1576, 1505, 1458, 1390, 1308, 1241, 1202, 1098, 964, 870, 815, 742, 692 cm<sup>-1</sup>. <sup>1</sup>H NMR (400 MHz, CDCl<sub>3</sub>, TMS)  $\delta$  3.80 (s, 3H), 6.86 (ddd, *J* = 1.6, 6.0, 7.6 Hz, 1H), 7.15-7.26 (m, 4H), 7.29-7.34 (m, 3H), 7.36-7.41 (m, 2H), 7.46-7.55 (m, 4H), 7.58 (d, *J* = 8.4 Hz, 1H), 7.62 (d, *J* = 8.8 Hz, 1H), 7.68 (d, *J* = 8.0 Hz, 1H), 7.74 (d, *J* = 8.8 Hz, 1H), 7.82 (d, *J* = 8.8 Hz, 1H), 8.01 (d, *J* = 8.0 Hz, 1H), 8.14 (d, *J* = 8.4 Hz, 1H), 8.39 (s, 1H). LRMS (ESI) *m/e* 684.2 [M<sup>+</sup>-I];

HRMS (ESI) calcd for [C<sub>35</sub>H<sub>25</sub>N<sub>3</sub>IAu-I] requires 684.1714, found 684.1713 [M<sup>+</sup>-I].

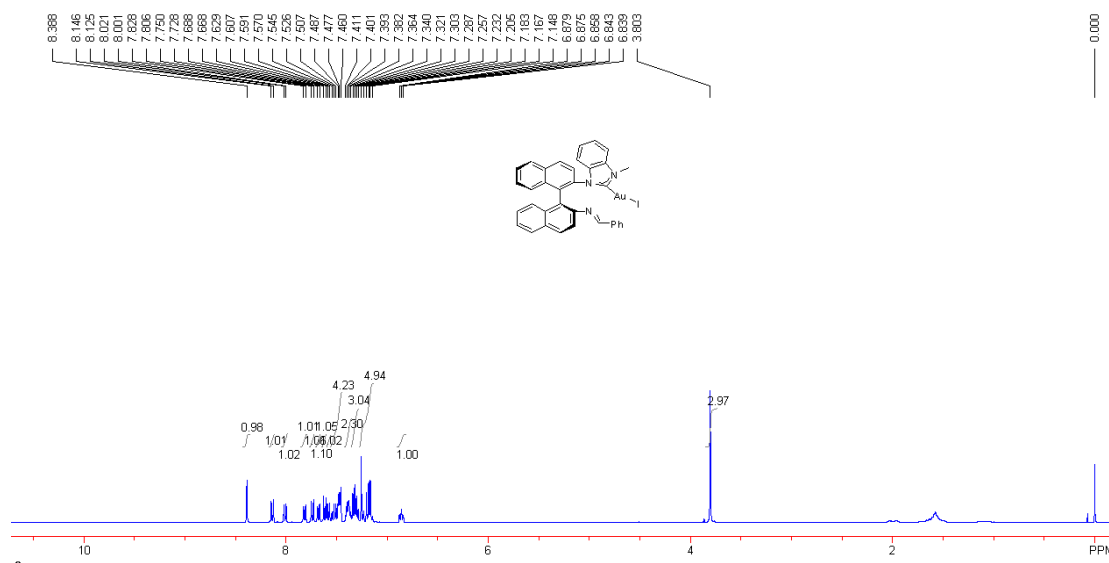

### (C) Preparation of 1,6-enynes and Diaryl Sulfoxides.

#### (1) 1,6-enyne **52a**

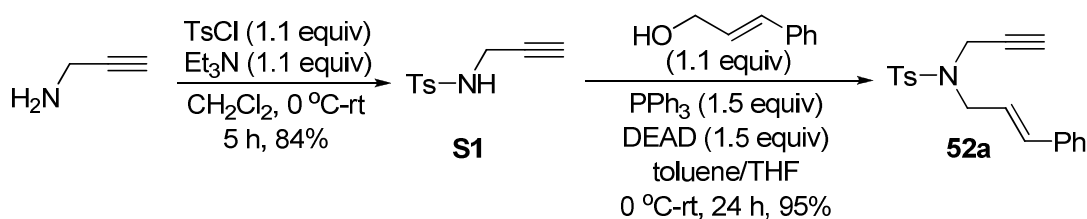

**Scheme S12**

To a mixture of propargylamine (412  $\mu$ L, 6 mmol) and NEt<sub>3</sub> (0.92 mL, 6.6 mmol) in CH<sub>2</sub>Cl<sub>2</sub> (4 mL) was added dropwise the solution of TsCl (1258 mg, 6.6 mmol) in CH<sub>2</sub>Cl<sub>2</sub> (12 mL) at 0 °C. Then the reaction system was warmed to room temperature and further stirred for 5 h followed by quenching with 20 mL of water. After extraction with CH<sub>2</sub>Cl<sub>2</sub> for three times, the combined organic phases were washed with saturated brine and then dried over anhydrous Na<sub>2</sub>SO<sub>4</sub>. The crude product was concentrated under reduced pressure and then purified by a silica gel flash column chromatography (eluent: petroleum ether/EtOAc, 5/1; containing minor NEt<sub>3</sub>) to give **S1** as a white solid in 84% yield. It is a known compound.<sup>[4a]</sup> <sup>1</sup>H NMR (400 MHz, CDCl<sub>3</sub>, TMS)  $\delta$  2.11 (t, *J* = 2.4 Hz, 1H), 2.43 (s, 3H), 3.83 (dd, *J* = 6.0, 2.4 Hz, 2H),

4.73 (t,  $J = 6.0$  Hz, 1H), 7.32 (d,  $J = 8.0$  Hz, 2H), 7.78 (d,  $J = 8.8$  Hz, 2H).

Under argon atmosphere, to the solution of **S1** (1046 mg, 5 mmol), cinnamyl alcohol (738 mg, 5.5 mmol) and  $\text{Ph}_3\text{P}$  (1967 mg, 7.5 mmol) in mixed toluene/THF (15 mL/5 mL) was added dropwise of DEAD (1.18 mL, 7.5 mmol) at 0 °C. The reaction system was warmed to room temperature and further stirred for 24 h. Then volatiles were removed under reduced pressure and the residue was purified by a silica gel flash column chromatography (eluent: petroleum ether/EtOAc, 10/1) to give **52a** as a white solid in 95% yield. It is a known compound.<sup>[4b]</sup>  $^1\text{H}$  NMR (400 MHz,  $\text{CDCl}_3$ , TMS)  $\delta$  2.05 (t,  $J = 2.0$  Hz, 1H), 2.43 (s, 3H), 3.99 (d,  $J = 6.8$  Hz, 2H), 4.13 (d,  $J = 2.0$  Hz, 2H), 6.08 (dt,  $J = 15.6, 6.8$  Hz, 1H), 6.57 (d,  $J = 15.6$  Hz, 1H), 7.23-7.33 (m, 7H), 7.76 (d,  $J = 8.4$  Hz, 2H) (Scheme S12).

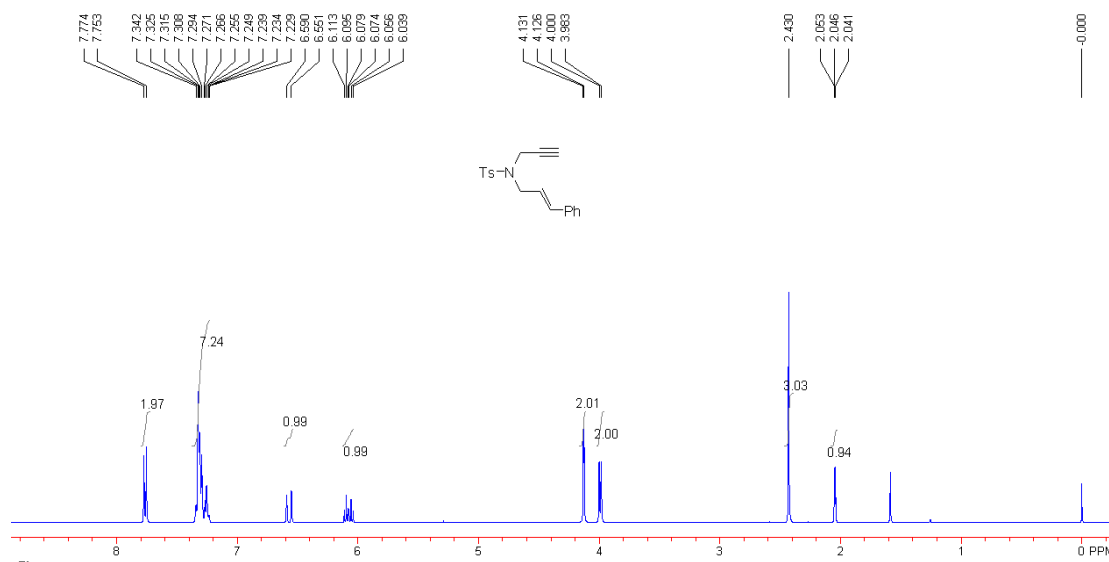

## (2) 1,6-enyne **52b**

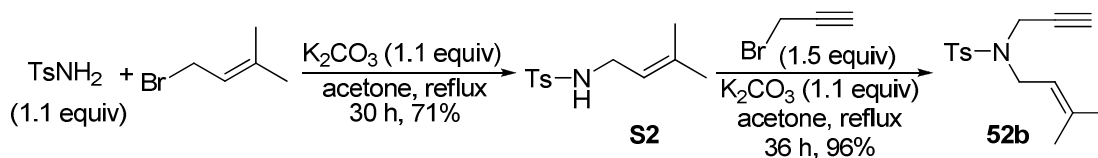

**Scheme S13**

1-Bromo-3-methyl-2-butene (2.33 mL, 20 mmol) was added to the suspension of  $\text{TsNH}_2$  (3767 mg, 22 mmol) and  $\text{K}_2\text{CO}_3$  (3041 mg, 22 mmol) in acetone (20 mL). Then the reaction system was refluxed at 60 °C for 30 h followed by cooling to room temperature, quenching by

30 mL of water and extraction with EtOAc for 3 times. The combined organic phases were dried over anhydrous Na<sub>2</sub>SO<sub>4</sub> and filtered through Celite. The filtrate was concentrated under reduced pressure and purified by a silica gel flash column chromatography (eluent: petroleum ether/EtOAc, 15/1) to give **S2** as a white solid in 71% yield. It is a known compound.<sup>[4c]</sup> <sup>1</sup>H NMR (400 MHz, CDCl<sub>3</sub>, TMS)  $\delta$  1.53 (s, 3H), 1.63 (s, 3H), 2.43 (s, 3H), 3.53 (t,  $J$  = 6.4 Hz, 2H), 4.48-4.50 (m, 1H), 5.03-5.07 (m, 1H), 7.28 (d,  $J$  = 8.0 Hz, 2H), 7.76 (d,  $J$  = 8.0 Hz, 2H).

To the mixture of compound **S2** (3415 mg, 14.27 mmol) obtained above and K<sub>2</sub>CO<sub>3</sub> (2960 mg, 21.4 mmol) in acetone (40 mL) was added propargyl bromide (1.85 mL, 21.4 mmol). Then the suspension was refluxed at 60 °C for 36 h followed by cooling to room temperature, quenching by 40 mL of water and extraction with EtOAc for 3 times. The combined organic phases were dried over anhydrous Na<sub>2</sub>SO<sub>4</sub>, concentrated under reduced pressure and purified by a silica gel flash column chromatography (eluent: petroleum ether/EtOAc, 20/1) to give **52b** as a white solid in 96% yield. It is a known compound.<sup>[4d]</sup> <sup>1</sup>H NMR (400 MHz, CDCl<sub>3</sub>, TMS)  $\delta$  1.67 (s, 3H), 1.72 (s, 3H), 1.98 (t,  $J$  = 2.4 Hz, 1H), 2.42 (s, 3H), 3.81 (d,  $J$  = 7.2 Hz, 2H), 4.07 (d,  $J$  = 2.4 Hz, 2H), 5.08-5.12 (m, 1H), 7.29 (d,  $J$  = 8.0 Hz, 2H), 7.74 (d,  $J$  = 8.4 Hz, 2H) (Scheme S13).

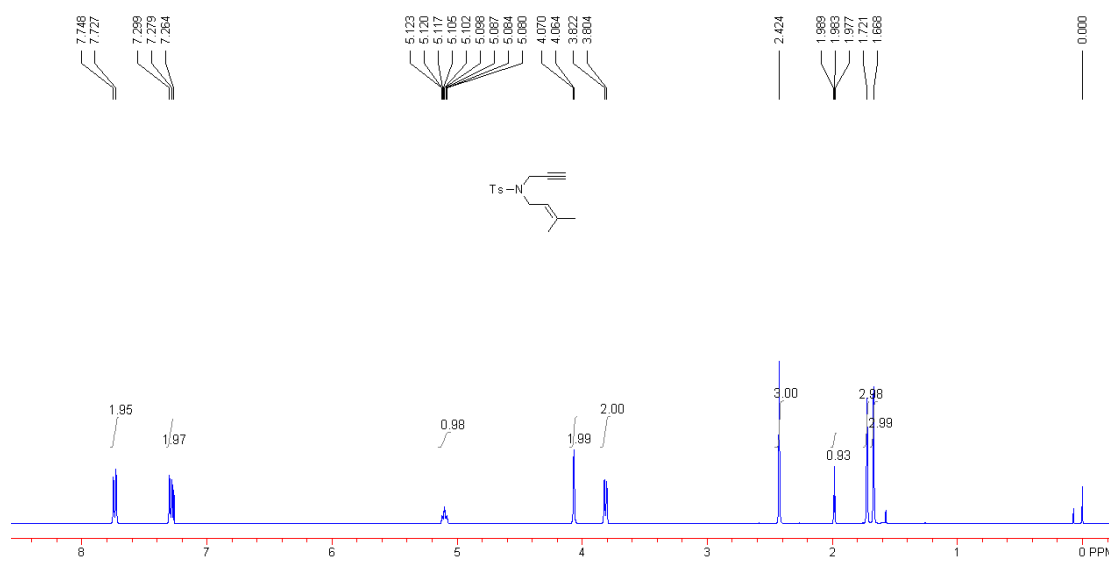

### (3) 1,6-enynes **52c-h**

The preparation procedures of 1,6-enynes **52c,d** were similar to that of 1,6-enyne **52a**

from compound **S1** by using corresponding substituted allyl alcohol instead during the Mitsunobu reaction step.

The preparations of 1,6-enynes **52e-g** were also similar to **52a** by allowing the reaction of corresponding sulfonamide with propargylamine before a Mitsunobu reaction step with cinnamyl alcohol.

The preparation of 1,6-enyne **52h** was according to a reported procedure by allowing the reaction of cinnamyl alcohol and propargyl bromide (1.2 equiv) with NaH (1.2 equiv) as the base in dry THF for 5 h.<sup>[4e]</sup>

#### Compound **52c**

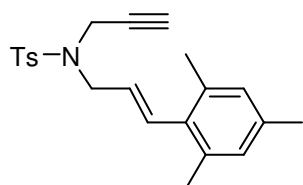

White solid; m.p. 93.4-94.6 °C. IR (direct irradiation)  $\nu$  3264, 2918, 2851, 2112, 1598, 1444, 1347, 1332, 1305, 1168, 1137, 1091, 997, 921, 893, 853, 811, 741, 688, 654  $\text{cm}^{-1}$ .  $^1\text{H}$  NMR (400 MHz,  $\text{CDCl}_3$ , TMS)  $\delta$  2.05 (t,  $J = 2.8$  Hz, 1H), 2.22 (s, 6H), 2.26 (s, 3H), 2.43 (s, 3H), 4.03 (dd,  $J = 0.8, 6.8$  Hz, 2H), 4.18 (d,  $J = 2.8$  Hz, 2H), 5.56 (dt,  $J = 16.0, 2.8$  Hz, 1H), 6.58 (d,  $J = 16.0$  Hz, 1H), 6.85 (s, 2H), 7.31 (d,  $J = 7.6$  Hz, 2H), 7.77 (d,  $J = 8.8$  Hz, 2H);  $^{13}\text{C}$  NMR (100 MHz,  $\text{CDCl}_3$ , TMS)  $\delta$  20.8, 20.9, 21.5, 35.8, 49.0, 73.9, 76.4, 127.4, 127.8, 128.6, 129.5, 132.8, 133.4, 135.8, 135.9, 136.6, 143.6. LRMS (EI)  $m/e$  367.2 (3.41%), 352.1 (10.16%), 196.1 (100%), 91.1 (18.03%); HRMS (EI) calcd for  $[\text{C}_{22}\text{H}_{25}\text{NO}_2\text{S}]$  requires 367.1606, found 367.1609  $[\text{M}^+]$ .

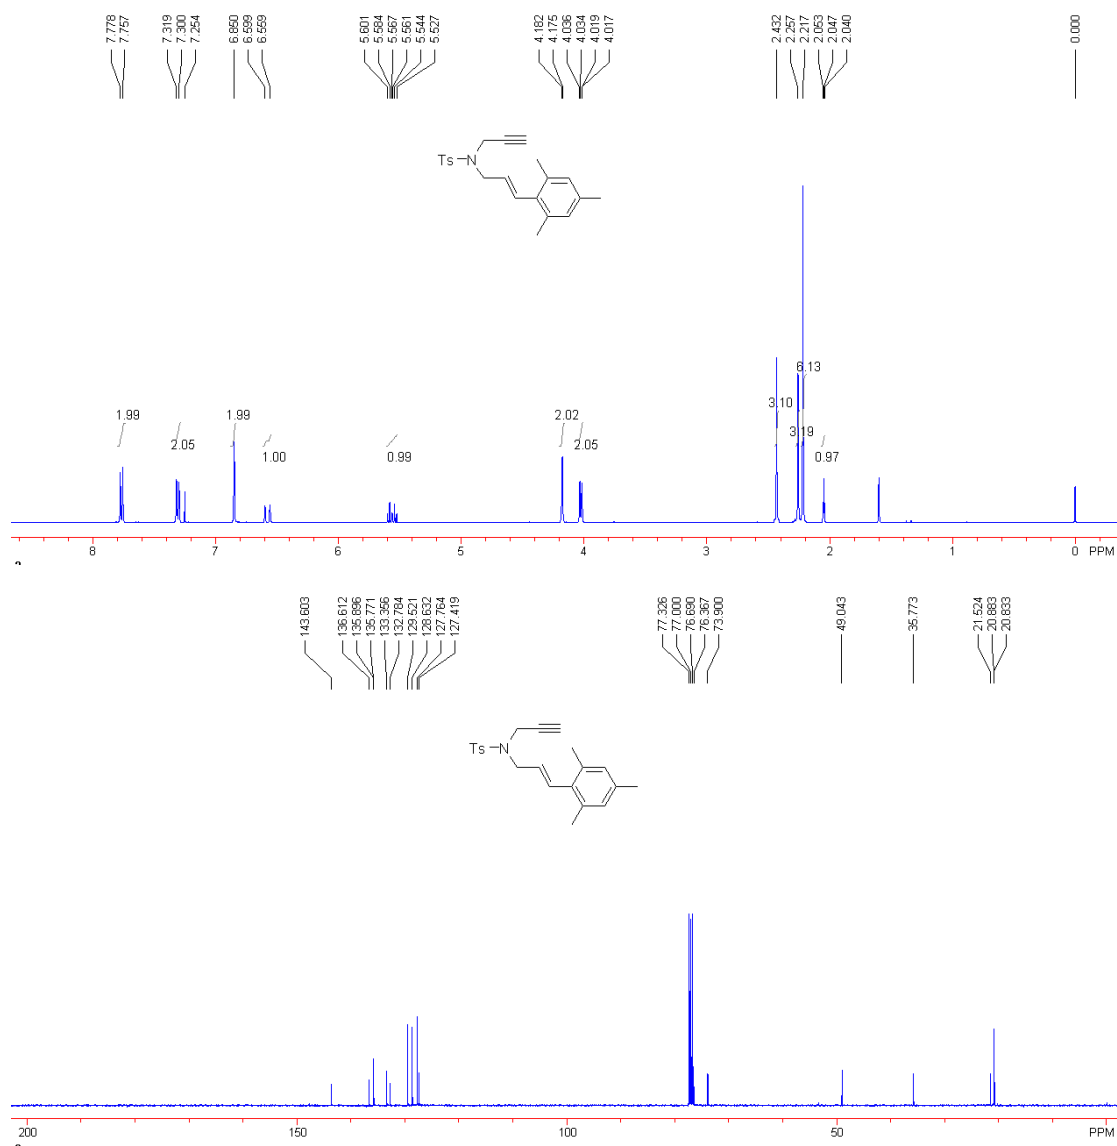

### Compound **52d**

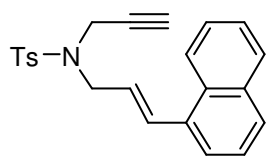

White solid; m.p. 100.7-101.7 °C. IR (direct irradiation)  $\nu$  3272, 2919, 2117, 1598, 1341, 1327, 1306, 1152, 1096, 1065, 969, 900, 798, 780, 750, 731, 700, 656 cm<sup>-1</sup>. <sup>1</sup>H NMR (400 MHz, CDCl<sub>3</sub>, TMS)  $\delta$  2.12 (t,  $J$  = 2.4 Hz, 1H), 2.43 (s, 3H), 4.12 (dd,  $J$  = 1.2, 6.8 Hz, 2H), 4.21 (d,  $J$  = 2.4 Hz, 2H), 6.11 (dt,  $J$  = 15.6, 6.8 Hz, 1H), 7.32 (d,  $J$  = 8.0 Hz, 2H), 7.35 (d,  $J$  = 16.4 Hz, 1H), 7.41-7.53 (m, 4H), 7.78-7.85 (m, 4H), 8.01-8.04 (m, 1H); <sup>13</sup>C NMR (100 MHz, CDCl<sub>3</sub>, TMS)  $\delta$  21.5, 36.0, 48.8, 74.0, 76.6, 123.5, 124.1, 125.5, 125.8, 125.9, 126.2, 127.8, 128.4, 128.5, 129.5, 131.0, 132.4, 133.5, 133.8, 136.0, 143.6. LRMS (EI)  $m/e$  375.1 (9.12%), 218.1 (100%), 191.1 (49.13%), 91.1 (19.72%); HRMS (EI) calcd for [C<sub>23</sub>H<sub>21</sub>NO<sub>2</sub>S] requires 375.1293, found 375.1295 [M<sup>+</sup>].

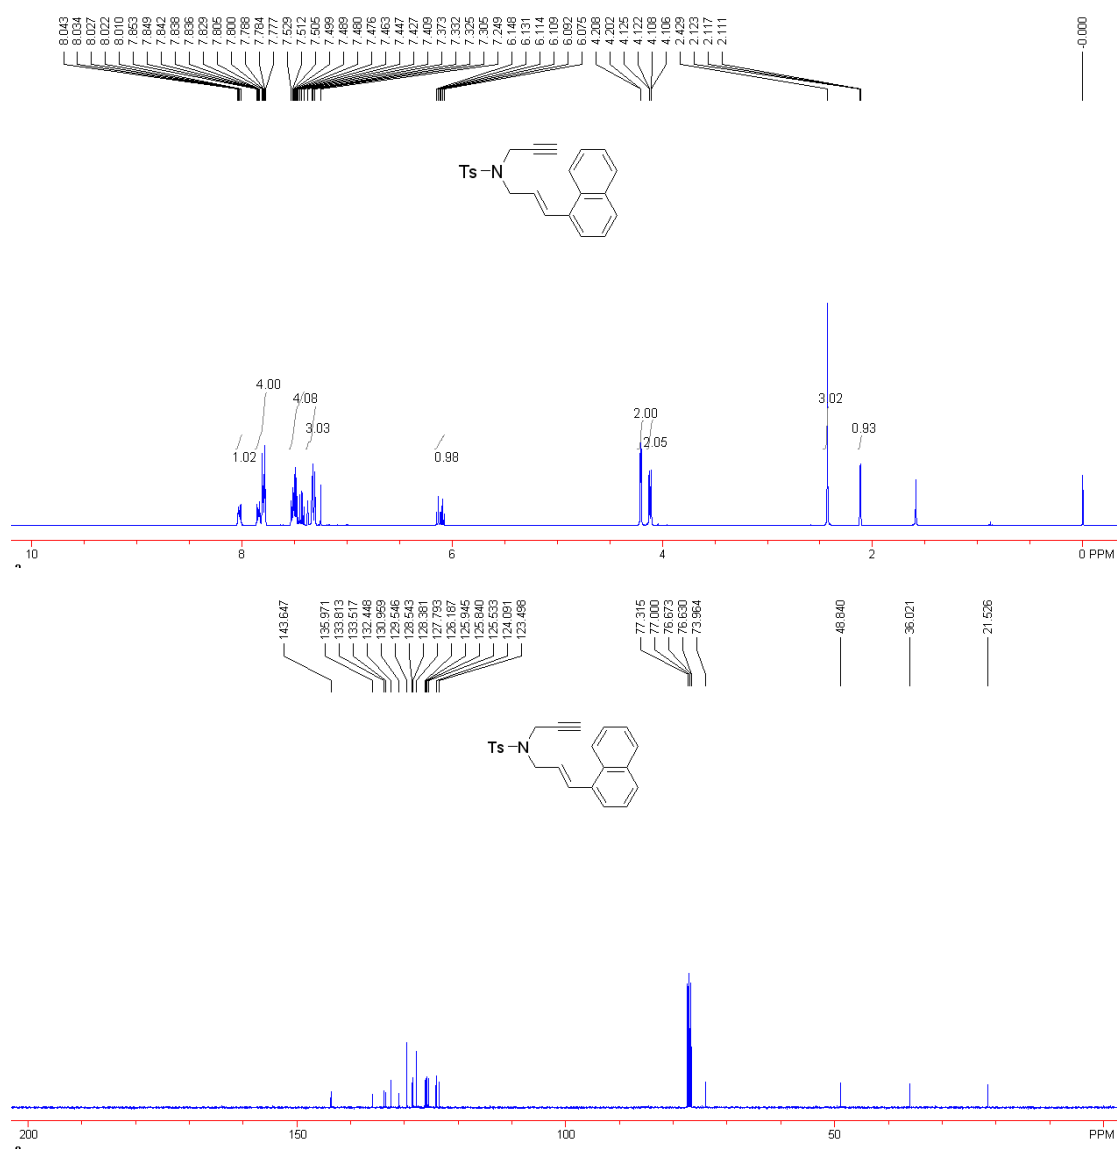

### Compound **52e**

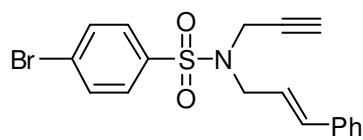

White solid; m.p. 113.9-115.0 °C. IR (direct irradiation)  $\nu$  3274, 2922, 2852, 2118, 1577, 1434, 1388, 1347, 1329, 1275, 1160, 1131, 1093, 1067, 1009, 971, 900, 839, 817, 759, 746, 728, 694,

666, 614 cm<sup>-1</sup>. <sup>1</sup>H NMR (400 MHz, CDCl<sub>3</sub>, TMS)  $\delta$  2.07 (t,  $J$  = 2.8 Hz, 1H), 3.99 (dd,  $J$  = 0.8, 6.8 Hz, 2H), 4.14 (d,  $J$  = 2.8 Hz, 2H), 6.08 (dt,  $J$  = 15.6, 6.8 Hz, 1H), 6.59 (d,  $J$  = 16.0 Hz, 1H), 7.24-7.36 (m, 5H), 7.63-7.67 (m, 2H), 7.73-7.76 (m, 2H); <sup>13</sup>C NMR (100 MHz, CDCl<sub>3</sub>, TMS)  $\delta$  35.9, 48.6, 74.2, 76.2, 122.4, 126.5, 127.8, 128.2, 128.6, 129.3, 132.1, 135.2, 135.9, 138.0. LRMS (EI)  $m/e$  389.0 (0.22%), 168.1 (100%), 142.1 (54.00%), 91.1 (12.52%); HRMS (EI)

calcd for  $[C_{18}H_{16}NO_2SBr]$  requires 389.0085, found 389.0079  $[M^+]$ .

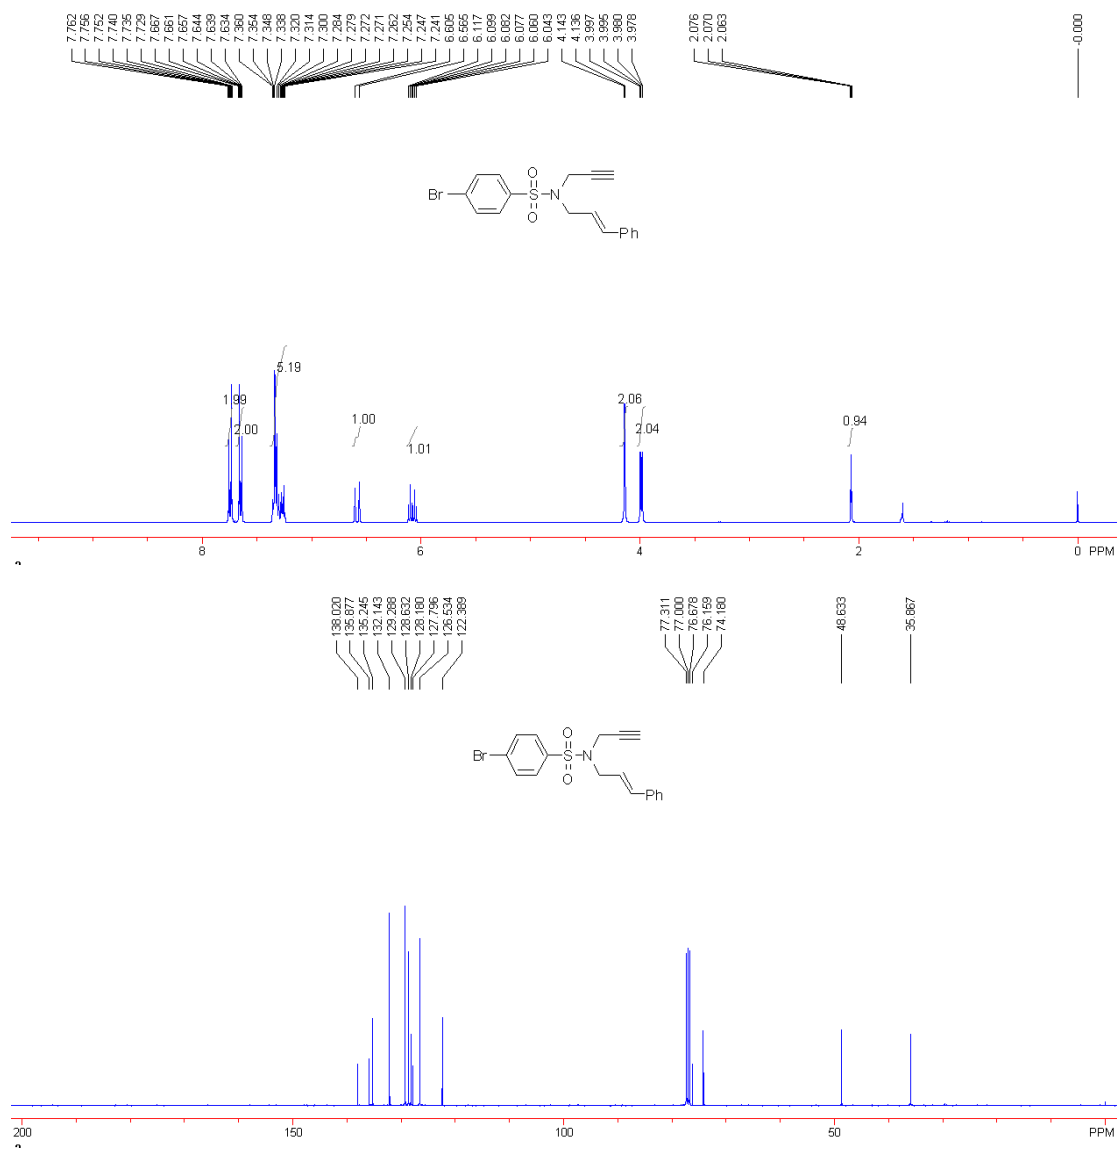

### Compound **52f**

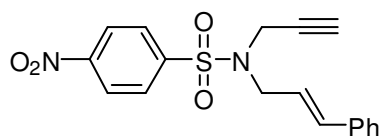

White solid; m.p. 127.9-128.9 °C. IR (direct irradiation)  $\nu$  3280, 1521, 1351, 1312, 1163, 1089, 972, 897, 856, 765, 752, 742, 722, 698, 681, 664, 626  $cm^{-1}$ .  $^1H$  NMR (400 MHz,  $CDCl_3$ ,

TMS)  $\delta$  2.07 (t,  $J$  = 2.8 Hz, 1H), 4.03 (dd,  $J$  = 0.8, 6.8 Hz, 2H), 4.19 (d,  $J$  = 2.8 Hz, 2H), 6.09 (dt,  $J$  = 16.0, 6.8 Hz, 1H), 6.60 (d,  $J$  = 15.6 Hz, 1H), 7.26-7.37 (m, 5H), 8.06-8.09 (m, 2H), 8.34-8.37 (m, 2H);  $^{13}C$  NMR (100 MHz,  $CDCl_3$ , TMS)  $\delta$  36.0, 48.9, 74.4, 75.9, 121.9, 124.1, 126.6, 128.4, 128.7, 129.0, 135.7, 144.9, 150.1. LRMS (EI)  $m/e$  356.1, 168.1 (100%), 142.1

(55.91%), 91.1 (15.57%); HRMS (EI) calcd for  $[C_{18}H_{16}N_2O_4S]$  requires 356.0831, found 356.0842  $[M^+]$ .

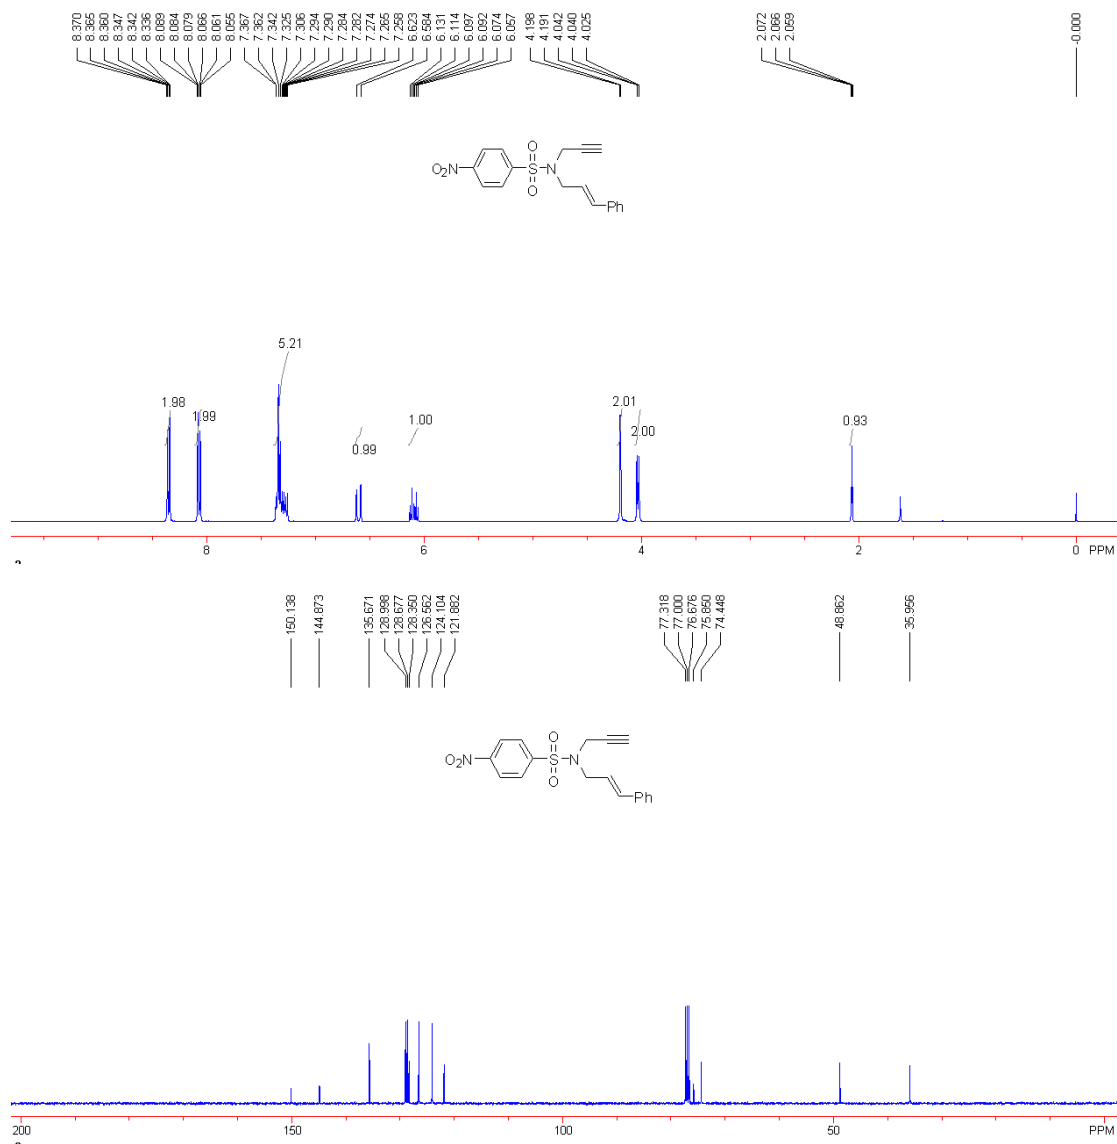

### Compound **52g**

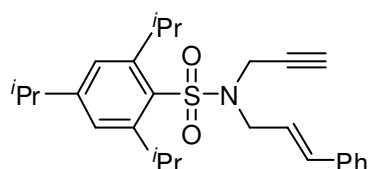

White solid; m.p. 104.7-105.7 °C. IR (direct irradiation)  $\nu$  3271, 2954, 2865, 1600, 1459, 1424, 1360, 1316, 1291, 1151, 1068, 1040, 973, 890, 847, 759, 735, 697, 670  $cm^{-1}$ .  $^1H$  NMR (400 MHz,  $CDCl_3$ , TMS)  $\delta$  1.25-1.28 (m, 18H), 2.30 (t,  $J$  = 2.4 Hz, 1H), 2.91 (hep,  $J$  = 6.8 Hz, 1H), 4.00 (d,  $J$  = 2.0 Hz, 2H), 4.07 (d,  $J$  = 7.6 Hz, 2H), 4.16 (hep,  $J$  = 6.8 Hz, 2H), 6.10 (dt,  $J$  = 16.0, 6.8 Hz, 1H), 6.62 (d,  $J$  = 15.6 Hz, 1H), 7.18 (s, 2H), 7.22-7.36 (m, 5H);  $^{13}C$  NMR (100

MHz, CDCl<sub>3</sub>, TMS)  $\delta$  23.5, 24.8, 29.3, 34.2, 34.5, 47.5, 73.3, 77.6, 123.0, 124.0, 126.5, 128.0, 128.6, 130.5, 135.2, 136.1, 151.7, 153.4. LRMS (EI) *m/e* 437.2, 267.1 (100%), 170.1 (37.76%), 91.1 (23.02%); HRMS (EI) calcd for [C<sub>27</sub>H<sub>35</sub>NO<sub>2</sub>S] requires 437.2389, found 437.2385 [M<sup>+</sup>].

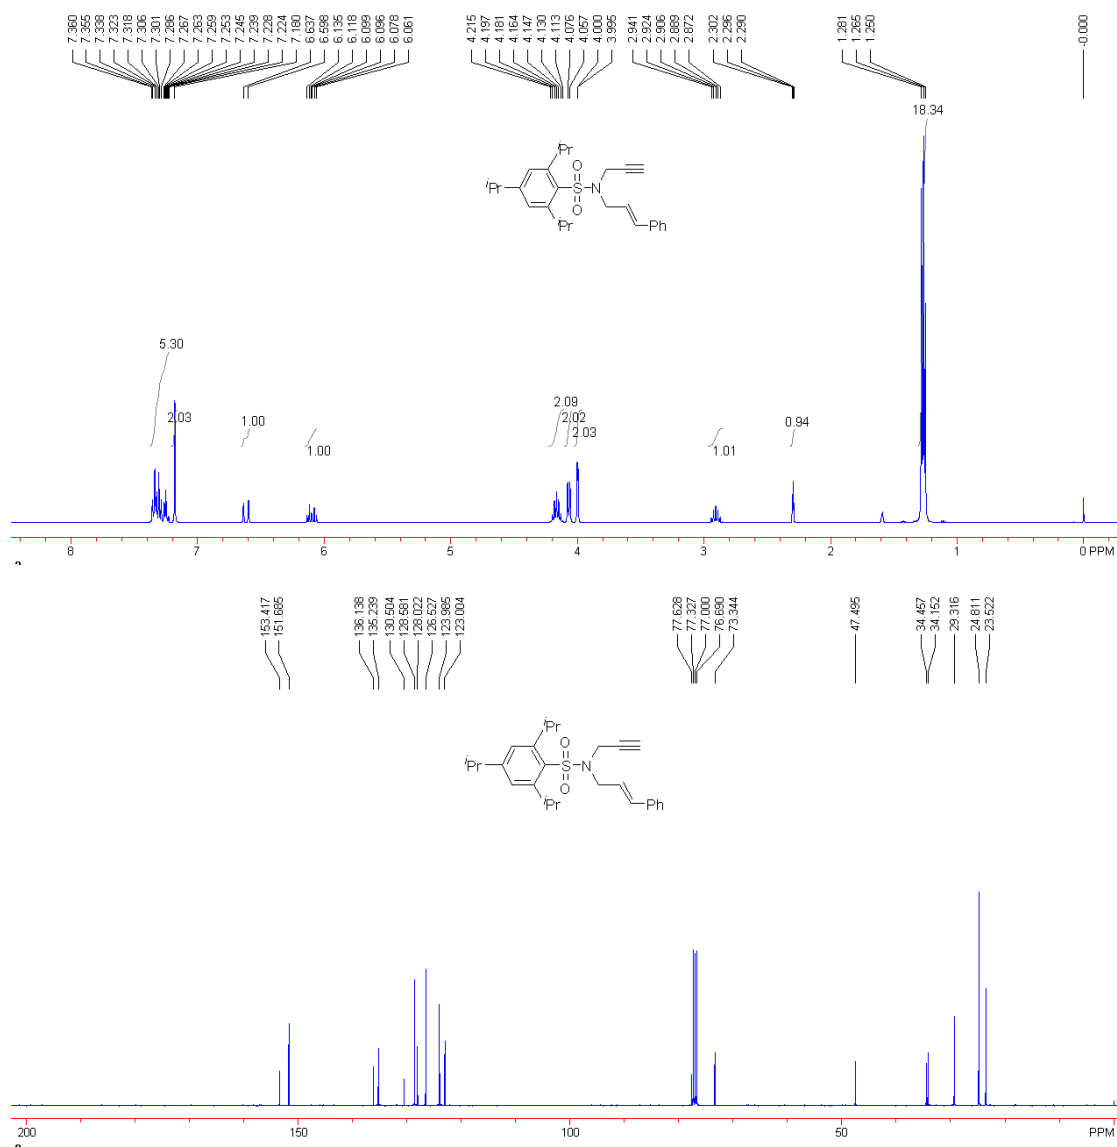

## Compound **52h**

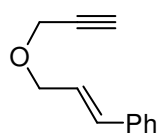

It is a known compound.<sup>[4e]</sup> Colorless oil. <sup>1</sup>H NMR (400 MHz, CDCl<sub>3</sub>, TMS)  $\delta$  2.45 (t, *J* = 2.8 Hz, 1H), 4.20 (d, *J* = 2.0 Hz, 2H), 4.24 (dd, *J* = 1.2, 6.4 Hz, 2H), 6.27 (dt, *J* = 16.0, 6.0 Hz, 1H), 6.64 (d, *J* = 16.0 Hz, 1H), 7.22-7.26 (m, 1H), 7.30-7.33 (m, 2H), 7.38-7.40 (m, 2H).

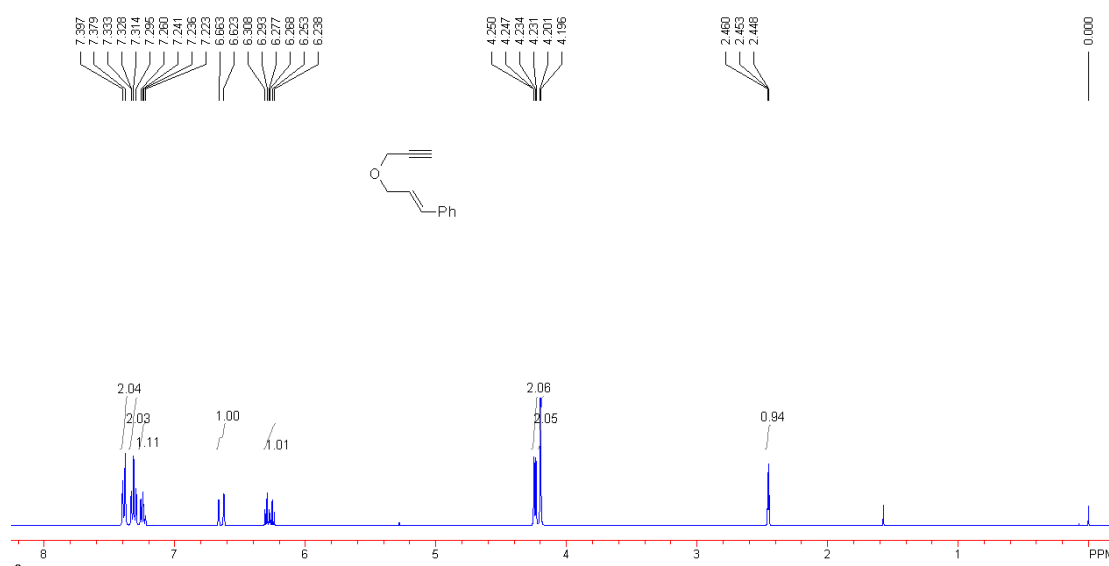

#### (4) Aryl Sulfoxides **57b** and **57c**

Aryl sulfoxides **57b**, **c** were prepared according to a modified procedure similar with that in the previous literature. In the presence of a small iodine crystal, the corresponding aryl bromide (20 mmol) and magnesium (486 mg, 20 mmol) in dry THF (15 mL) were carefully allowed to start a Grignard reaction at room temperature and then refluxed for further 30 minutes. To the obtained solution of arylmagnesium bromide (20 mmol) in THF was added dropwise thionyl chloride (0.73 mL, 10 mmol) in dry THF (10 mL) for 0.5~1 h at 0 °C. Then the mixture was quenched by careful addition of water at 0 °C and extracted with CH<sub>2</sub>Cl<sub>2</sub> for 3 times. The combined organic phases were washed with saturated NaHCO<sub>3</sub>, dried over anhydrous Na<sub>2</sub>SO<sub>4</sub>, concentrated under reduced pressure and purified by a silica gel flash column chromatography (eluent: petroleum ether/EtOAc, 10/1) to give **57b** (or **57c**) as a white solid in 31% (or 40%) yield (Scheme S14).

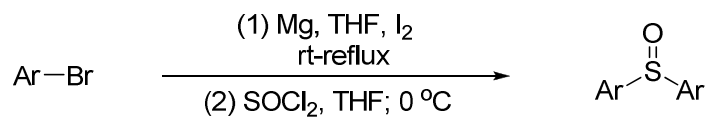

**Scheme S14**

#### Compound **57a**

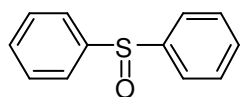

It is commercially available.  $^1\text{H}$  NMR (400 MHz,  $\text{CDCl}_3$ , TMS)  $\delta$  7.41-7.48 (m, 6H), 7.63-7.66 (m, 4H);  $^{13}\text{C}$  NMR (100 MHz,  $\text{CDCl}_3$ , TMS)

$\delta$  124.7, 129.3, 131.0, 145.5.

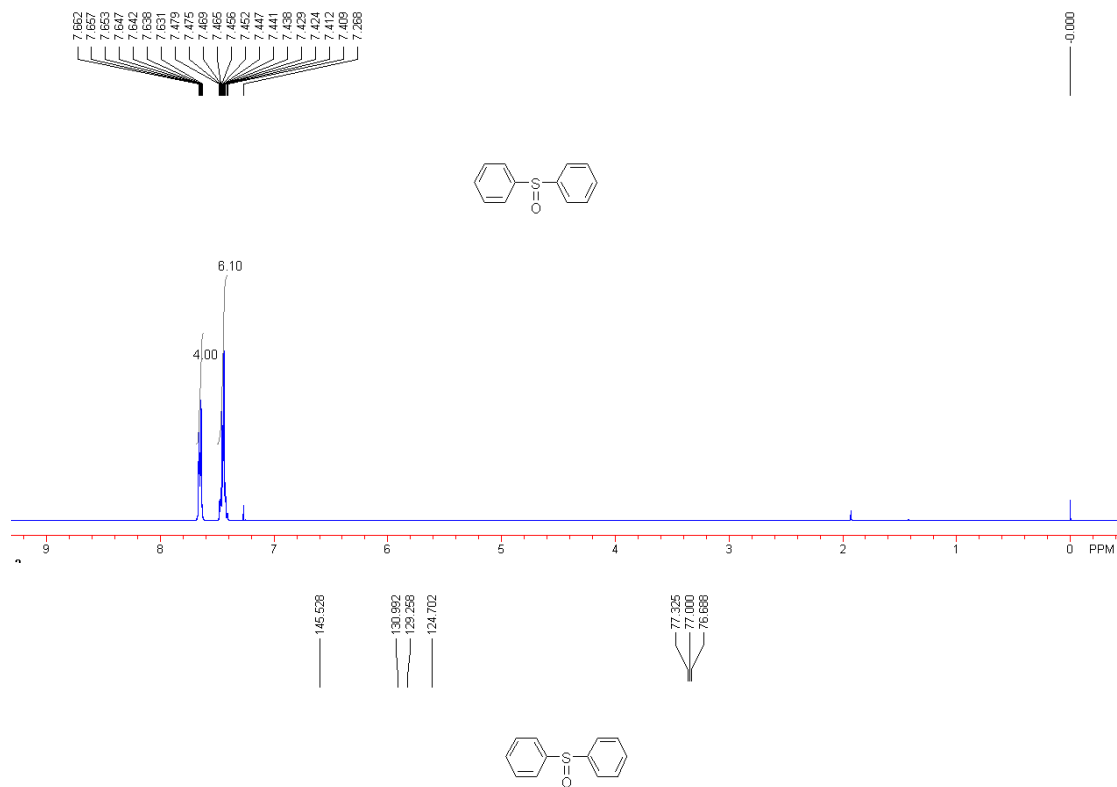

### Compound **57b**

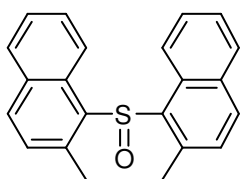

White solid; m.p. 157.2-158.2  $^{\circ}\text{C}$ . IR (direct irradiation)  $\nu$  3052, 2962, 2923, 2855, 1965, 1934, 1504, 1448, 1422, 1350, 1147, 1042, 1016, 977, 817, 773, 747, 641  $\text{cm}^{-1}$ .  $^1\text{H}$  NMR (400 MHz,  $\text{CDCl}_3$ , TMS)  $\delta$  2.50 (s, 6H), 7.19 (d,  $J$  = 8.8 Hz, 2H), 7.41-7.48 (m, 4H), 7.77-7.81 (m, 4H), 7.19-7.22 (m, 2H);  $^{13}\text{C}$  NMR (100 MHz,  $\text{CDCl}_3$ , TMS)  $\delta$  20.4, 123.4, 125.7, 127.2, 128.7,

129.9, 131.5, 132.1, 132.8, 135.7, 137.3. LRMS (EI)  $m/e$  330.1 (61.02%), 188.0 (100%), 128.1 (48.77%), 115.1 (35.40%); HRMS (EI) calcd for  $[C_{22}H_{18}OS]$  requires 330.1078, found 330.1081  $[M^+]$ .

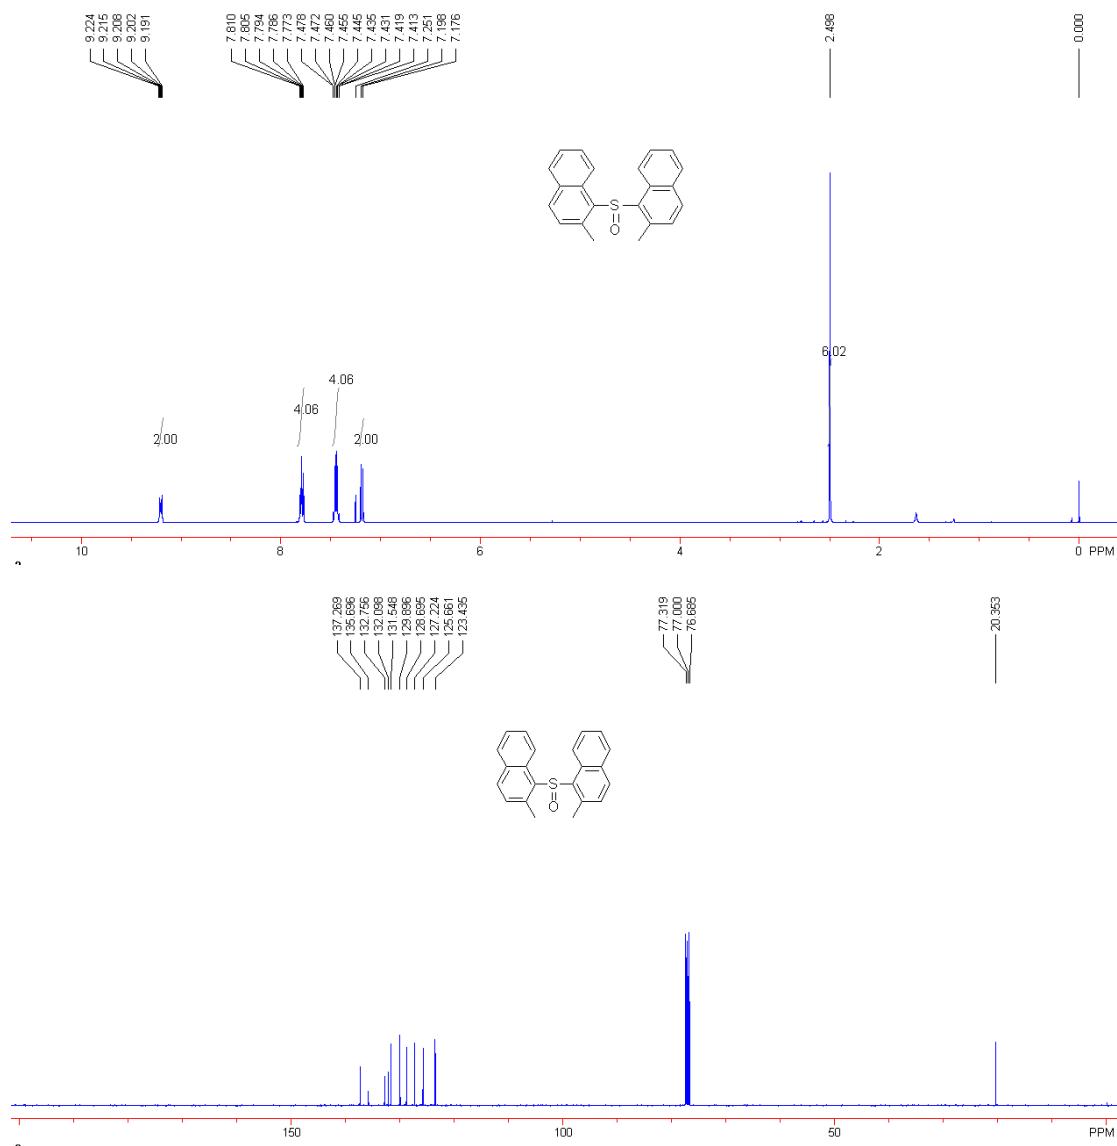

### Compound **57c**

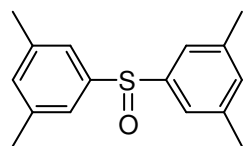

White solid; m.p. 128.3-129.3 °C. IR (direct irradiation)  $\nu$  2916, 2858, 1605, 1575, 1454, 1096, 1049, 992, 859, 847, 835, 692, 680  $cm^{-1}$ .  $^1H$  NMR (400 MHz,  $CDCl_3$ , TMS)  $\delta$  2.33 (s, 12H), 7.04 (s, 2H), 7.24 (s, 4H);

$^{13}C$  NMR (100 MHz,  $CDCl_3$ , TMS)  $\delta$  21.3, 122.3, 132.7, 139.2, 145.3. LRMS (EI)  $m/e$  258.1 (100%), 210.1 (64.72%), 137.0 (28.70%), 77.0 (20.01%); HRMS (EI) calcd for  $[C_{16}H_{18}OS]$

requires 258.1078, found 258.1081 [M<sup>+</sup>].

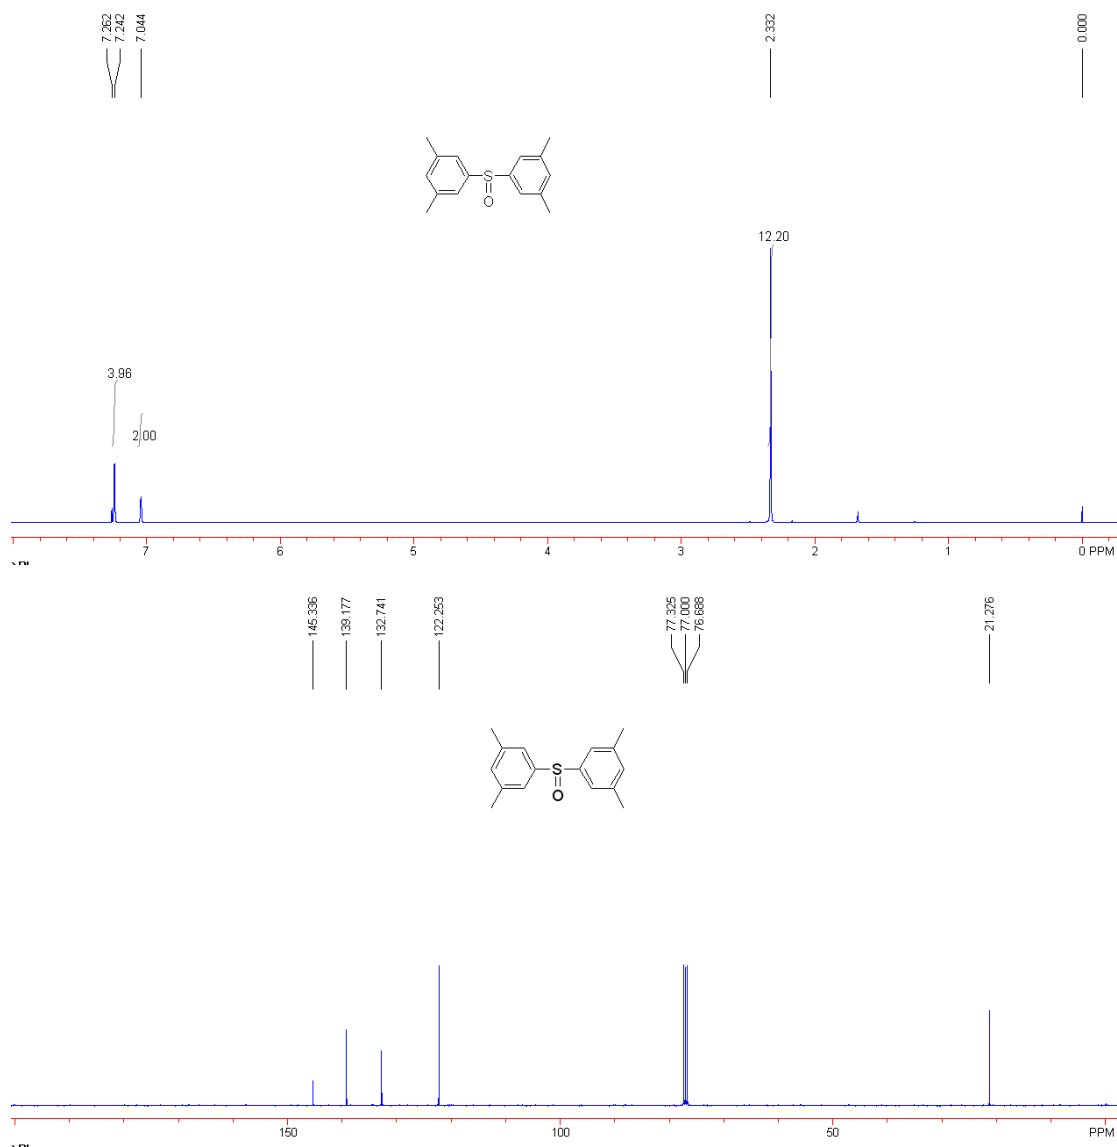

#### (D) General Procedure for NHC-Au(I) Complexes-Catalyzed Asymmetric Acetoxycyclization of 1,6-Enynes and Analytical Data for Products.

A mixture of NHC-Au(I) complex (5 mol%), 1,6-enyne **52** (0.1 mmol) and AgSbF<sub>6</sub> (2 mg, 0.005 mmol) in acetic acid (1 mL, commercially available) was stirred at room temperature until completely consuming of **52** by TLC monitoring. Then the reaction was quenched by filtering through a Celite with a thin pad of silica gel and volatiles were removed under reduced pressure. The residue was purified by a silica gel flash column chromatography (eluent: petroleum ether/EtOAc, 8/1) to give the corresponding product **53** as a white solid

(Scheme S15).

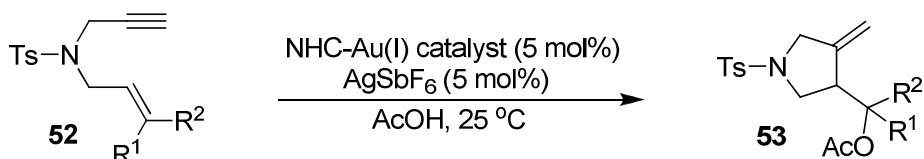

**Scheme S15**

Alternatively, to a solution of NHC-Au(I) complex (5 mol%), 1,6-enyne **52a** (33 mg, 0.1 mmol) and AgX (0.005 mmol) in dry DCE (1 mL) was added dry acetic acid (115  $\mu$ L, 2 mmol) as the nucleophile under argon atmosphere. The mixture was stirred at proper temperature until completely consuming of **52a** by TLC monitoring. Then the reaction was quenched by filtering through a Celite with a thin pad of silica gel and volatiles were removed under reduced pressure. The residue was purified by a silica gel flash column chromatography to give **53a** (eluent: petroleum ether/EtOAc, 8/1) as a white solid (Scheme S16).

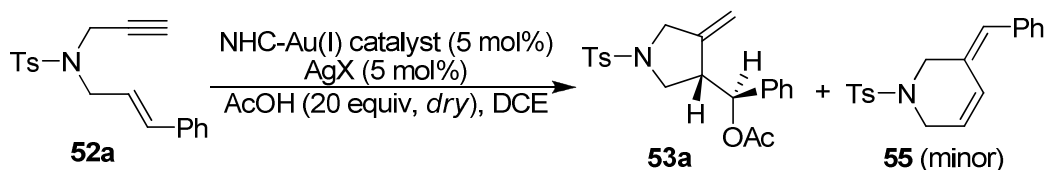

**Scheme S16**

Racemic products for chiral HPLC analysis were prepared by using  $\text{Ph}_3\text{PAuCl}$  (3 mg, 5 mol%) and  $\text{AgSbF}_6$  (2 mg, 0.005 mmol) as the catalyst instead according to a similar procedure mentioned above.

#### Compound **53a**

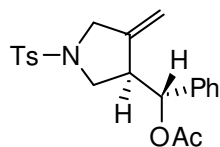

White solid, > 99% yield; m.p. 73.5-74.7  $^{\circ}\text{C}$ . Absolute stereochemistry was assigned by analogy to compound **54**,  $[\alpha]_D^{20} = -18$  ( $c$  0.5,  $\text{CHCl}_3$ ), -59% *ee*.

IR (direct irradiation)  $\nu$  3477, 2955, 2924, 2853, 1740, 1662, 1597, 1494, 1455, 1371, 1343, 1227, 1160, 1091, 1016, 965, 907, 814, 753, 701, 663  $\text{cm}^{-1}$ .  $^1\text{H}$  NMR (400 MHz,  $\text{CDCl}_3$ , TMS)  $\delta$  2.00 (s, 3H), 2.44 (s, 3H), 3.12-3.14 (m, 1H), 3.33-3.43 (m, 2H), 3.74 (d,  $J = 13.6$  Hz, 1H), 3.83 (d,  $J = 13.6$  Hz, 1H), 4.52 (d,  $J = 1.2$  Hz, 1H), 4.90 (s, 1H), 5.70 (d,

$J = 7.2$  Hz, 1H), 7.22 (d,  $J = 7.6$  Hz, 2H), 7.26-7.35 (m, 5H), 7.69 (d,  $J = 7.6$  Hz, 2H);  $^{13}\text{C}$  NMR (100 MHz,  $\text{CDCl}_3$ , TMS)  $\delta$  20.9, 21.5, 48.1, 49.8, 52.5, 75.3, 110.1, 126.7, 127.8, 128.2, 128.4, 129.7, 132.7, 138.3, 142.8, 143.8, 169.7. LRMS (ESI)  $m/e$  408.1  $[\text{M}^+ + \text{Na}]$ ; HRMS (ESI) calcd for  $[\text{C}_{21}\text{H}_{23}\text{NO}_4\text{S} + \text{Na}]$  requires 408.1245, found 408.1244  $[\text{M}^+ + \text{Na}]$ .

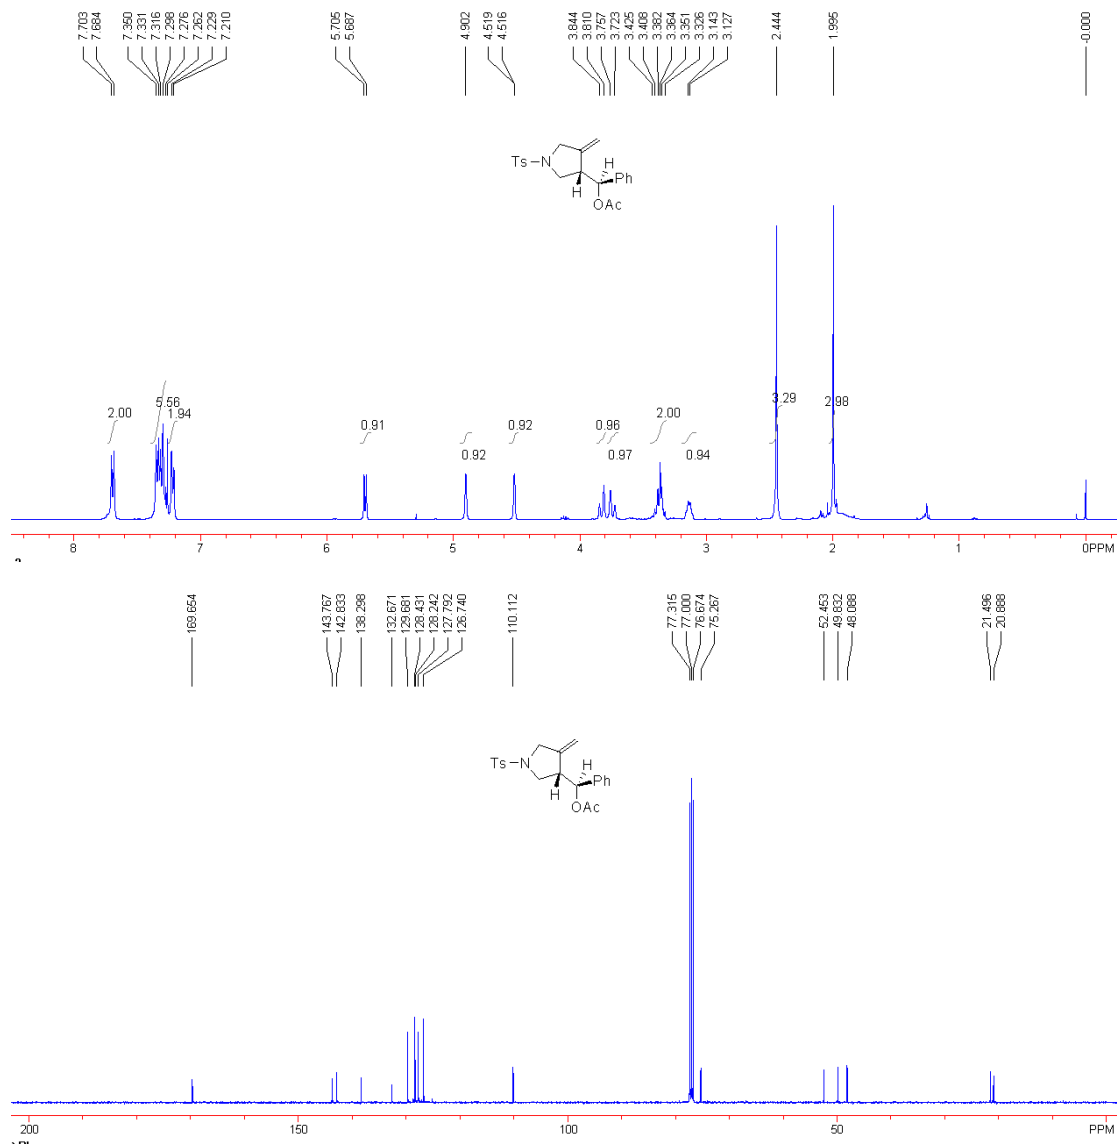

## WH-500 Chiral HPLC Analysis Report:

ID; Content; Retention time; Peak height; Peak area; Concentration; Tailing effect; Theoretic tower plates

## WH-500 色谱分析报告

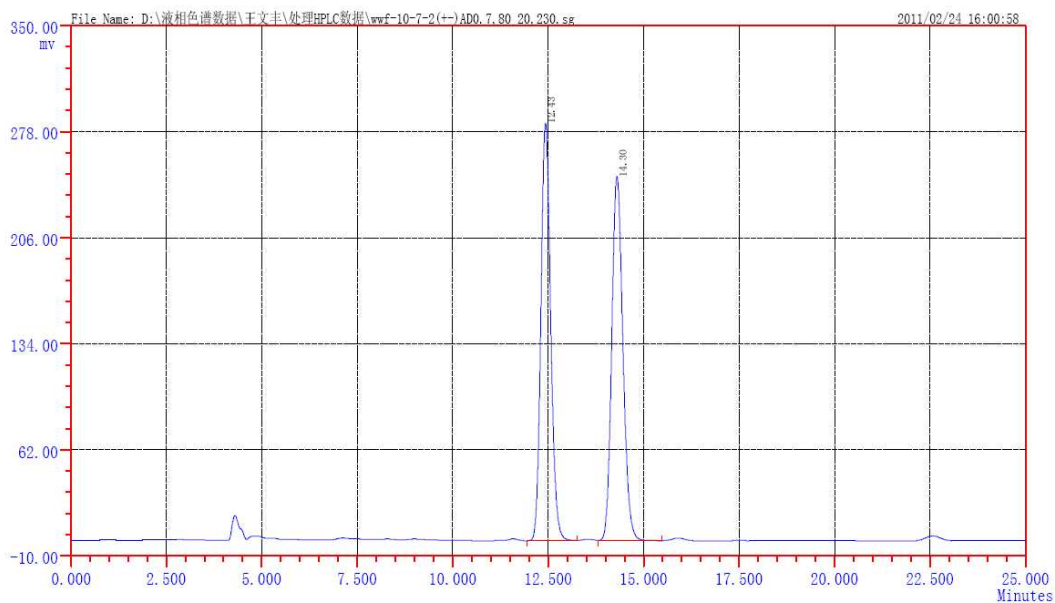

| ID | 组分名 | 保留时间   | 峰高     | 峰面积        | 浓度       | 拖尾因子 | 理论塔板 |
|----|-----|--------|--------|------------|----------|------|------|
| 1  |     | 12.430 | 283618 | 5036733.3  | 49.9633  | 1.15 | 9764 |
| 2  |     | 14.302 | 247559 | 5044133.0  | 50.0367  | 1.16 | 9819 |
| Σ: |     |        | 531177 | 10080866.3 | 100.0000 |      |      |

## WH-500 色谱分析报告

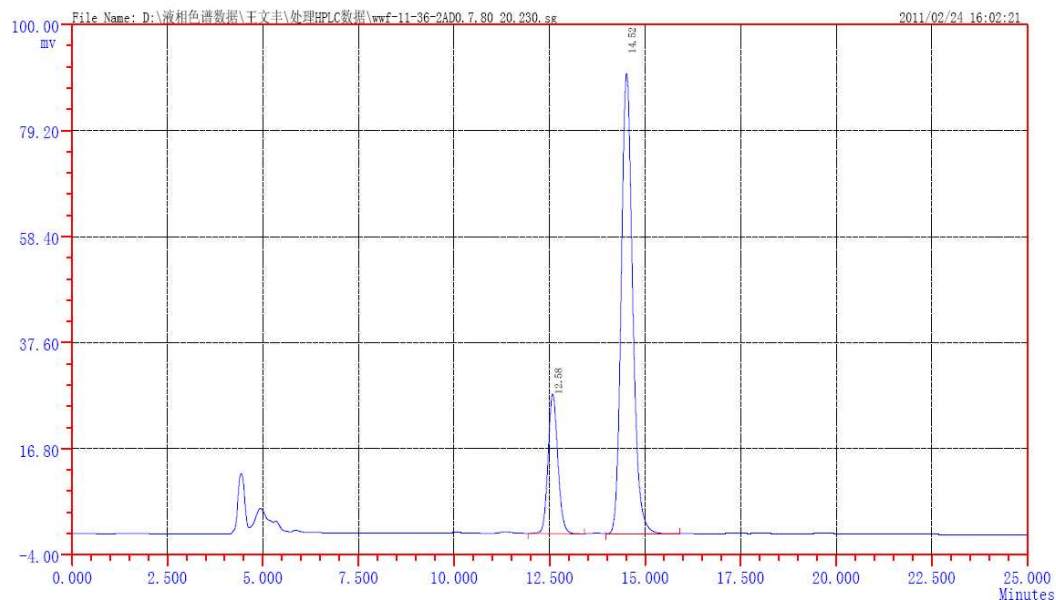

| ID | 组分名 | 保留时间   | 峰高     | 峰面积       | 浓度       | 拖尾因子 | 理论塔板 |
|----|-----|--------|--------|-----------|----------|------|------|
| 1  |     | 12.578 | 27387  | 486807.0  | 20.5305  | 1.13 | 9980 |
| 2  |     | 14.517 | 90355  | 1884330.4 | 79.4695  | 1.18 | 9657 |
| Σ: |     |        | 117742 | 2371137.4 | 100.0000 |      |      |

[HPLC conditions: Chiracel AD-H column, hexane/2-propanol = 80:20, flow rate = 0.7 mL·min<sup>-1</sup>, wavelength = 230 nm,  $t_R$  = 12.6 min (minor),  $t_R$  = 14.5 min (major)].

## Compound **53b**

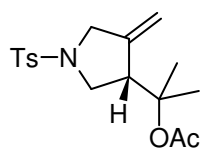

White solid, 66% yield; m.p. 88.5-89.2 °C. Absolute stereochemistry was assigned by analogy to compound **54**,  $[\alpha]_D^{20} = +1.3$  (*c* 0.5, CHCl<sub>3</sub>), 20% *ee*.

IR (direct irradiation)  $\nu$  2959, 2925, 2854, 1733, 1663, 1595, 1455, 1384,

1366, 1338, 1309, 1256, 1239, 1224, 1182, 1162, 1134, 1121, 1093, 1028, 1016, 933, 834, 818,

800, 712, 659 cm<sup>-1</sup>. <sup>1</sup>H NMR (400 MHz, CDCl<sub>3</sub>, TMS)  $\delta$  1.38 (s, 3H), 1.47 (s, 3H), 1.94 (s,

3H), 2.44 (s, 3H), 3.21 (t, *J* = 8.4 Hz, 1H), 3.34 (d, *J* = 7.6 Hz, 1H), 3.43 (dd, *J* = 2.8, 10.0 Hz,

1H), 3.71 (d, *J* = 13.6 Hz, 1H), 3.89 (d, *J* = 13.6 Hz, 1H), 5.06 (d, *J* = 12 Hz, 2H), 7.35 (d, *J* =

8.0 Hz, 2H), 7.71 (d, *J* = 8.0 Hz, 2H); <sup>13</sup>C NMR (100 MHz, CDCl<sub>3</sub>, TMS)  $\delta$  21.5, 22.4, 23.3,

23.6, 49.6, 50.7, 53.0, 83.2, 111.5, 127.8, 129.7, 132.6, 143.7, 143.8, 170.3. LRMS (ESI) *m/e*

338.1 [M<sup>+</sup>+H]; HRMS (ESI) calcd for [C<sub>17</sub>H<sub>23</sub>NO<sub>4</sub>S+H] requires 338.1426, found 338.1432

[M<sup>+</sup>+H].

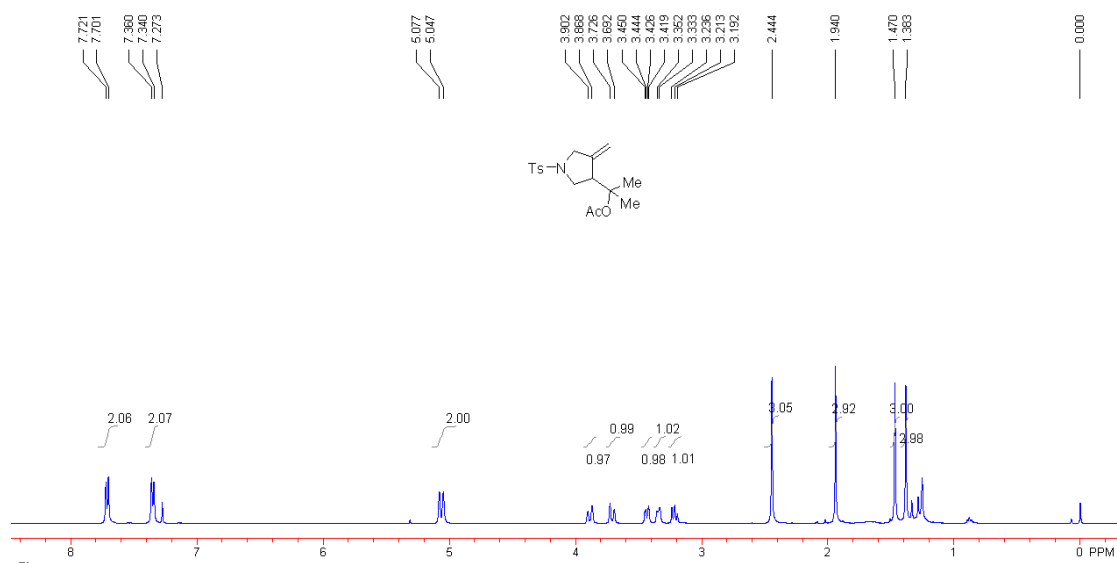

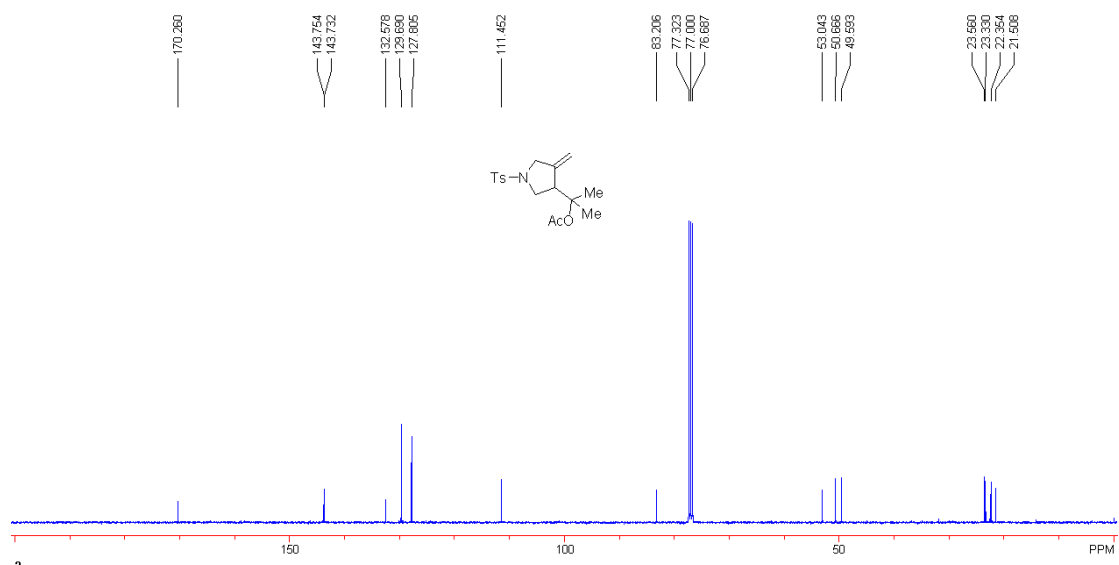

## WH-500 Chiral HPLC Analysis Report:

ID; Content; Retention time; Peak height; Peak area; Concentration; Tailing effect; Theoretic tower plates

## WH-500 色谱分析报告

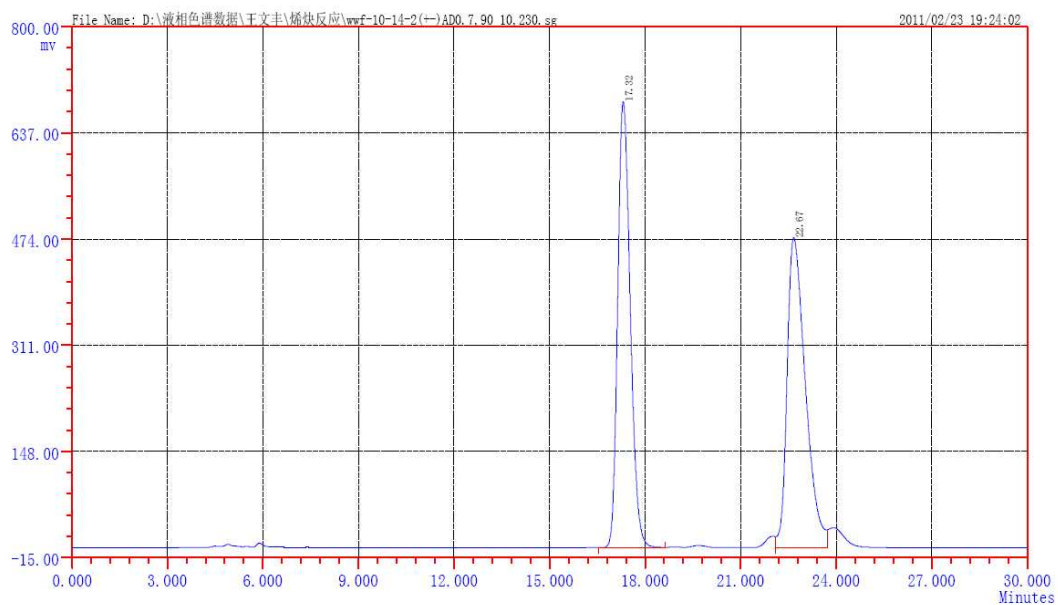

| ID | 组分名 | 保留时间   | 峰高      | 峰面积        | 浓度       | 拖尾因子 | 理论塔板 |
|----|-----|--------|---------|------------|----------|------|------|
| 1  |     | 17.315 | 684872  | 18750178.1 | 49.6838  | 1.24 | 7972 |
| 2  |     | 22.672 | 476137  | 18988828.9 | 50.3162  | 1.63 | 6441 |
| Σ: |     |        | 1161009 | 37739007.0 | 100.0000 |      |      |

## WH-500 色谱分析报告

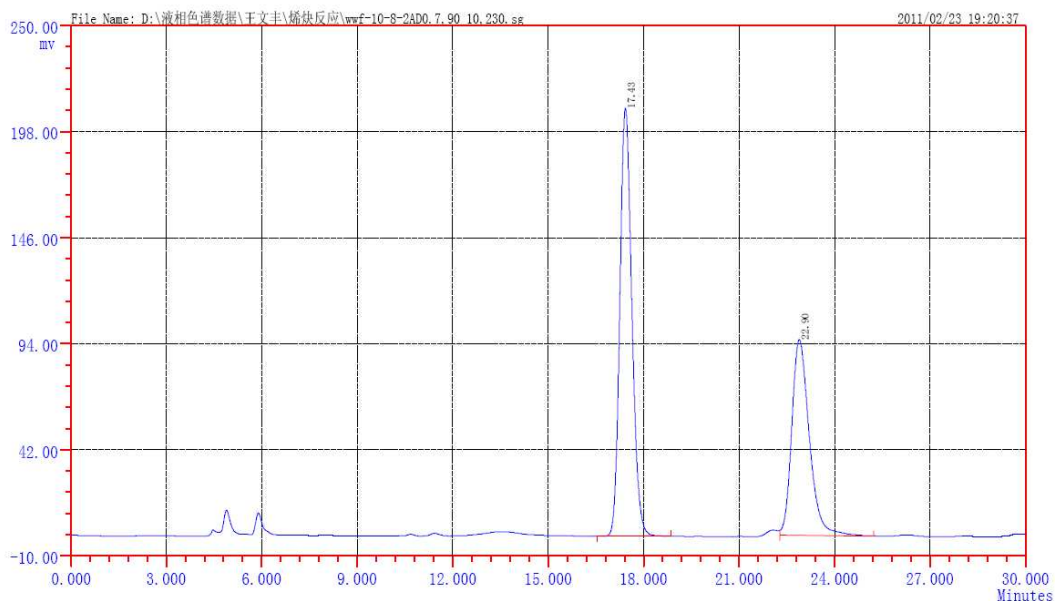

| ID | 组分名 | 保留时间   | 峰高     | 峰面积       | 浓度       | 拖尾因子 | 理论塔板 |
|----|-----|--------|--------|-----------|----------|------|------|
| 1  |     | 17.427 | 209842 | 5503722.6 | 59.8985  | 1.17 | 8799 |
| 2  |     | 22.898 | 95990  | 3684690.3 | 40.1015  | 1.27 | 7092 |
| Σ: |     |        | 305832 | 9188412.9 | 100.0000 |      |      |

[HPLC conditions: Chiracel AD-H column, hexane/2-propanol = 90:10, flow rate = 0.7 mL·min<sup>-1</sup>, wavelength = 230 nm,  $t_R$  = 17.4 min (major),  $t_R$  = 22.9 min (minor)].

### Compound **54**<sup>[5]</sup>

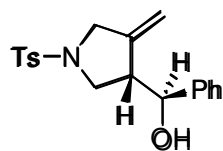

White solid; m.p. 43.9-45.2 °C. Absolute stereochemistry was assigned by the sign of optical rotation with that in the literature:  $[\alpha]_D^{20} = +31.3$  ( $c$  0.5, CHCl<sub>3</sub>) (lit.,<sup>[5]</sup> +51.2), 45% *ee*. IR (direct irradiation)  $\nu$  3502, 2956, 2923, 2853, 1712, 1666, 1597, 1494, 1454, 1338, 1306, 1156, 1093, 1041, 1016, 901, 813, 765, 702, 661 cm<sup>-1</sup>. <sup>1</sup>H NMR (400 MHz, CDCl<sub>3</sub>, TMS)  $\delta$  2.14 (br, 1H), 2.44 (s, 3H), 2.97-2.98 (m, 1H), 3.22 (dd,  $J$  = 7.6, 10.0 Hz, 1H), 3.53 (dd,  $J$  = 5.2, 9.6 Hz, 1H), 3.80 (s, 2H), 4.55 (d,  $J$  = 1.6 Hz, 1H), 4.67 (d,  $J$  = 6.4 Hz, 1H), 4.93 (d,  $J$  = 0.8 Hz, 1H), 7.24-7.34 (m, 7H), 7.70 (d,  $J$  = 8.0 Hz, 2H); <sup>13</sup>C NMR (100 MHz, CDCl<sub>3</sub>, TMS)  $\delta$  21.5, 49.5, 50.5, 52.6, 73.8, 109.4, 126.3, 127.92, 127.93, 128.4, 129.7, 132.5, 141.8, 143.7, 144.2. LRMS (ESI)  $m/e$  344.1 [ $M^+$ +H]; HRMS (ESI) calcd for [C<sub>19</sub>H<sub>21</sub>NO<sub>3</sub>S+H] requires 344.1320, found 344.1329 [ $M^+$ +H].

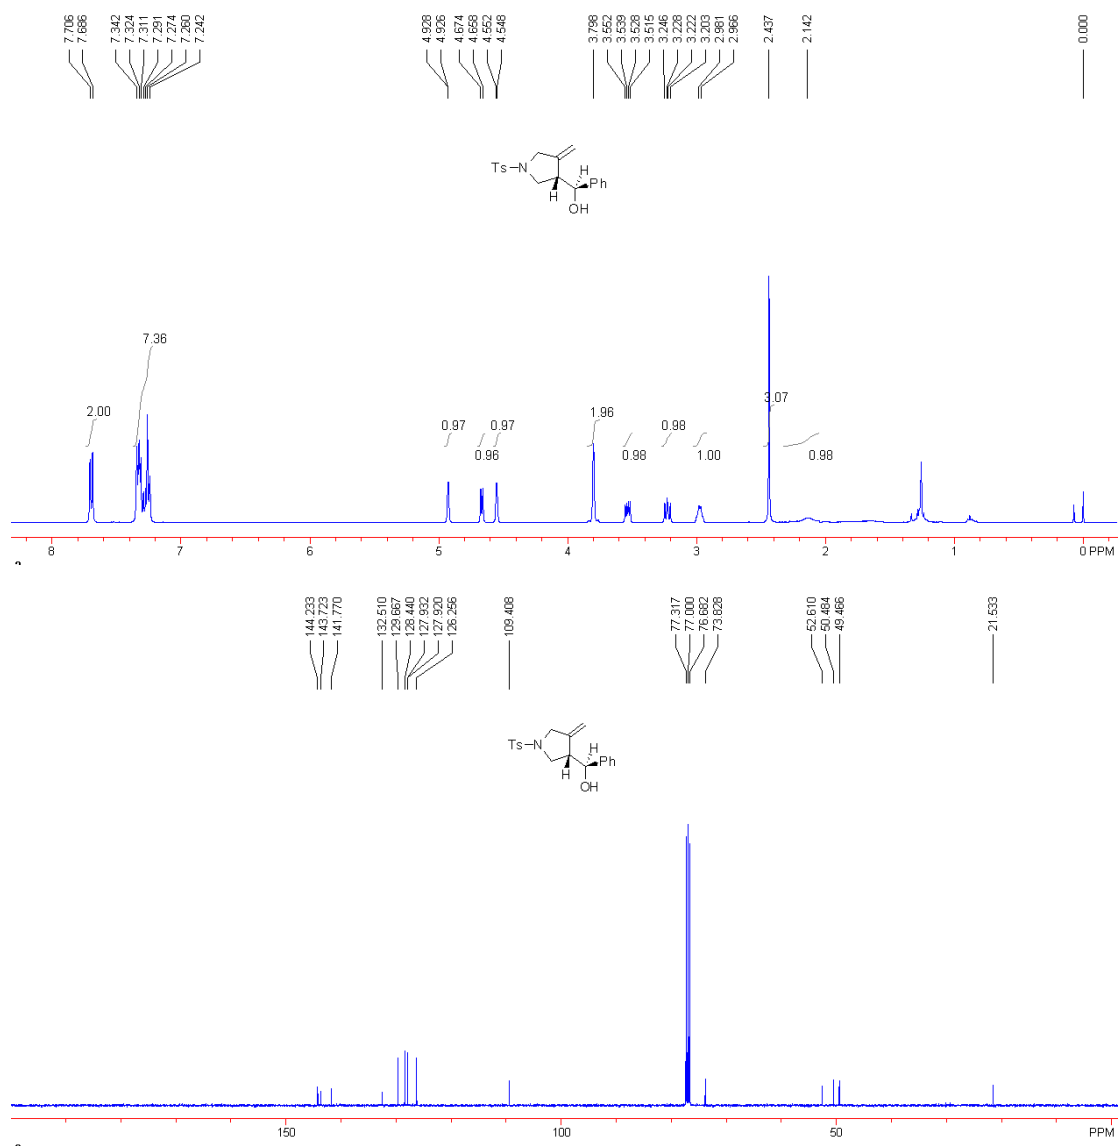

## WH-500 Chiral HPLC Analysis Report:

ID; Content; Retention time; Peak height; Peak area; Concentration; Tailing effect; Theoretic tower plates

## WH-500 色谱分析报告

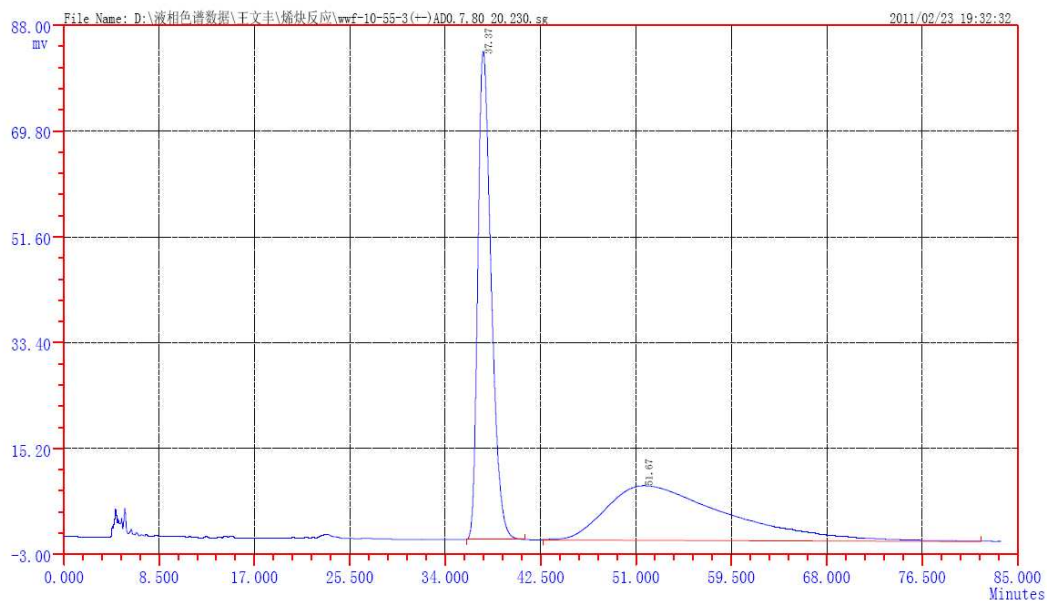

| ID | 组分名 | 保留时间   | 峰高    | 峰面积        | 浓度       | 拖尾因子 | 理论塔板 |
|----|-----|--------|-------|------------|----------|------|------|
| 1  |     | 37.373 | 84001 | 6984979.3  | 49.9005  | 1.43 | 4026 |
| 2  |     | 51.673 | 9383  | 7012836.8  | 50.0995  | 1.90 | 95   |
| Σ: |     |        | 93384 | 13997816.1 | 100.0000 |      |      |

## WH-500 色谱分析报告

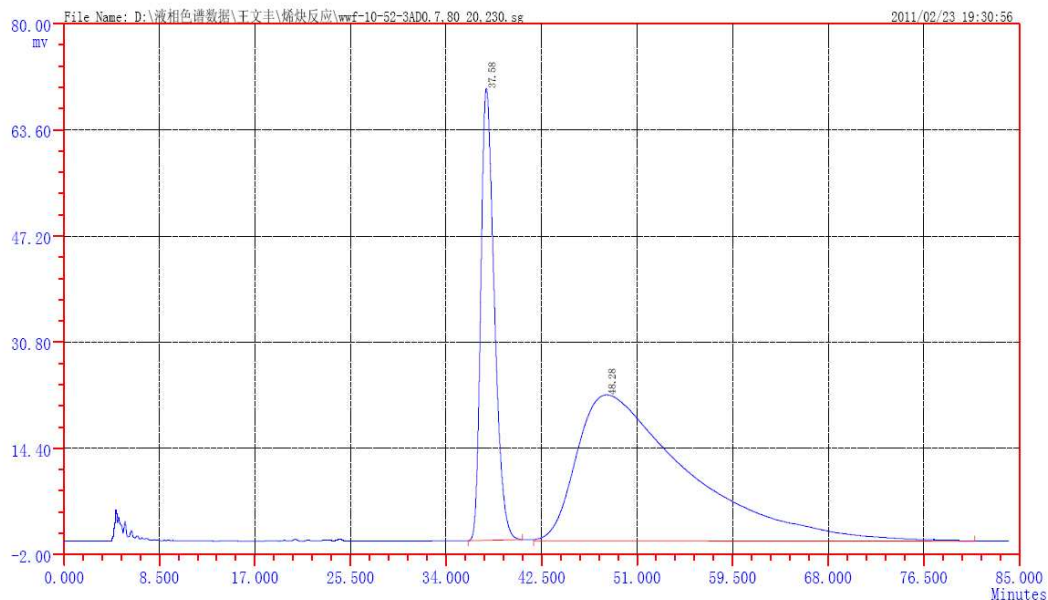

| ID | 组分名 | 保留时间   | 峰高    | 峰面积        | 浓度       | 拖尾因子 | 理论塔板 |
|----|-----|--------|-------|------------|----------|------|------|
| 1  |     | 37.578 | 69802 | 5832007.3  | 27.3169  | 1.39 | 4032 |
| 2  |     | 48.275 | 22502 | 15517472.3 | 72.6831  | 2.51 | 98   |
| Σ: |     |        | 92304 | 21349479.6 | 100.0000 |      |      |

[HPLC conditions: Chiracel AD-H column, hexane/2-propanol = 80:20, flow rate = 0.7 mL·min<sup>-1</sup>, wavelength = 230 nm,  $t_R$  = 37.6 min (minor),  $t_R$  = 48.3 min (major)].

## Compound **55**

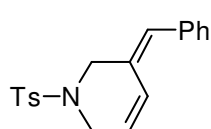

It is a known compound.<sup>[6]</sup> White solid. <sup>1</sup>H NMR (400 MHz, CDCl<sub>3</sub>, TMS)

δ 2.40 (s, 3H), 3.92 (s, 2H), 3.97 (s, 2H), 5.74 (d, *J* = 10.4 Hz, 1H), 6.32 (s, 1H), 6.49 (d, *J* = 10.0 Hz, 1H), 7.07 (d, *J* = 7.6 Hz, 2H), 7.23-7.32 (m, 5H),

7.70 (d, *J* = 8.0 Hz, 2H). <sup>13</sup>C NMR (100 MHz, CDCl<sub>3</sub>, TMS) δ 21.5, 45.9, 49.8, 124.1, 126.1, 127.07, 127.14, 127.8, 128.2, 128.9, 129.1, 129.5, 134.3, 135.9, 143.5.

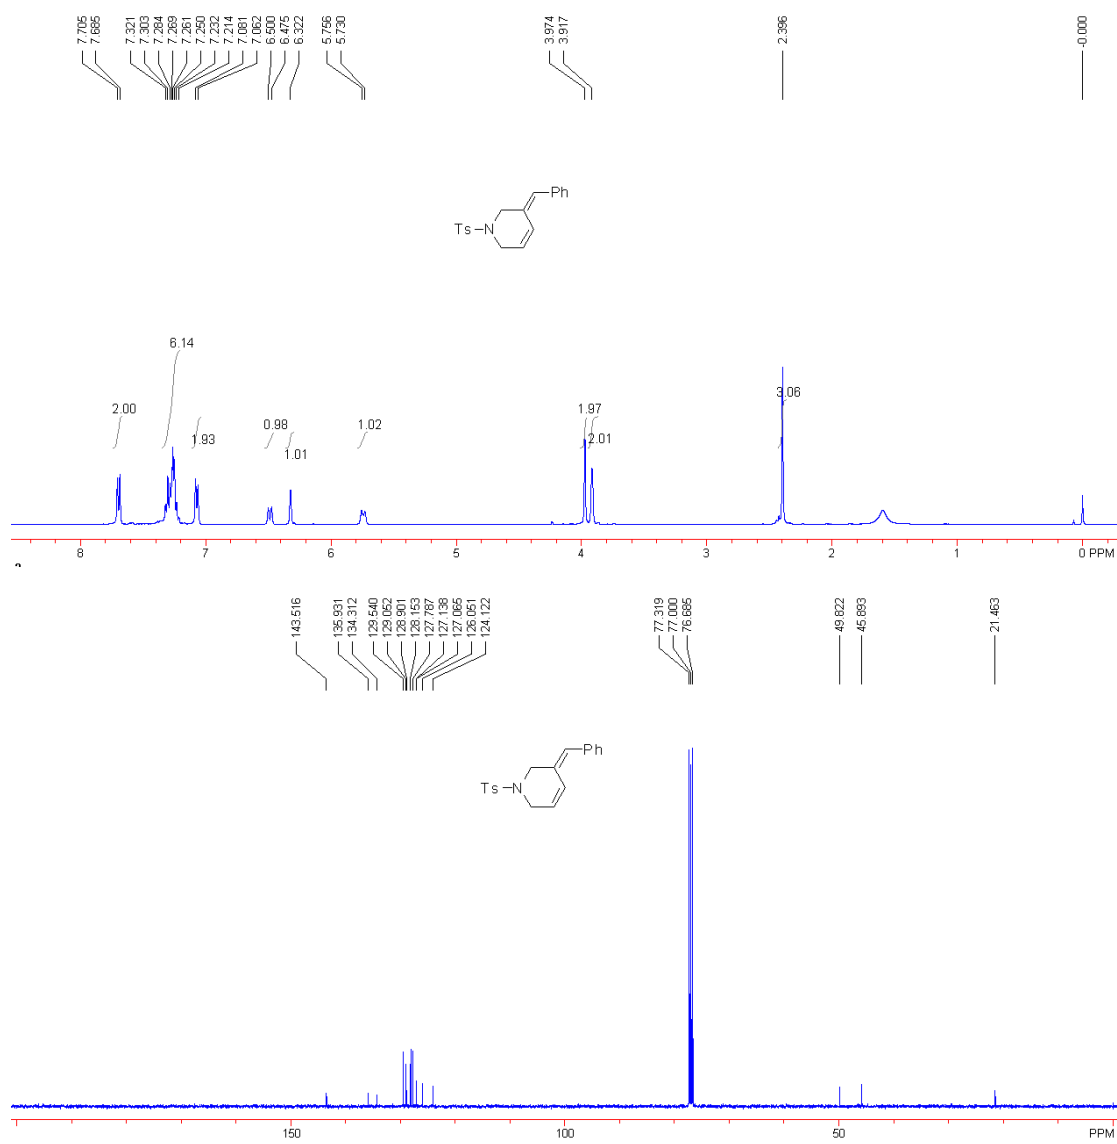

## (E) General Procedure for NHC-Au(I) Complexes-Catalyzed Enantioselective Oxidative Rearrangement of 1,6-Enynes and Analytical Data for Products.

Under argon atmosphere, to a flame-dried Schlenk tube equipped with a septum and stirring bar were added activated 4Å MS (50 mg), NHC-Au(I) complex (5 mol%), 1,6-enyne **52** (0.1 mmol), Ph<sub>2</sub>SO (30 mg, 0.15 mmol) and AgSbF<sub>6</sub> (2 mg, 0.005 mmol) followed by the injection of corresponding dry solvent (1 mL). The mixture was stirred at proper temperature until completely consuming of **52** by TLC monitoring before quenching by filtering with a thin pad of silica gel. Then volatiles were removed under reduced pressure and the residue was purified by a silica gel flash column chromatography to give the oxidative product **56** (Scheme S17).

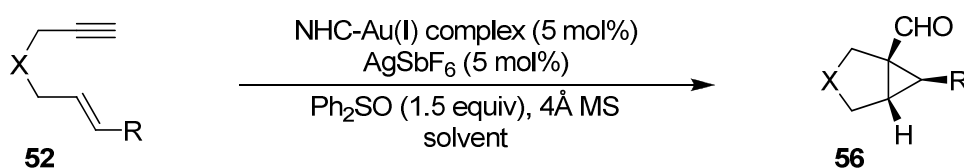

**Scheme S17**

Racemic products for chiral HPLC analysis were prepared by using Ph<sub>3</sub>PAuCl (5 mg, 10 mol%) and AgSbF<sub>6</sub> (4 mg, 0.01 mmol) as the catalyst with the solvent of DCE instead according to a similar procedure mentioned above.

Due to the insolubility of aldehyde **56f** in the mixture of hexane/isopropanol, the ee value of product **56f** was determined by a chiral HPLC analysis of its alcohol derivative **56f'**. To the suspension of **56f** (37 mg, 0.1 mmol) in MeOH (5 mL) was slowly added NaBH<sub>4</sub> (13 mg, 0.35 mmol) at room temperature. After stirring for further 15 minutes, the reaction was quenched by evaporating of MeOH and addition of water. Then the mixture was extracted with CH<sub>2</sub>Cl<sub>2</sub> for 3 times and the combined organic phases were dried over anhydrous Na<sub>2</sub>SO<sub>4</sub>. Volatiles were removed under reduced pressure and the residue was purified by a silica gel flash column chromatography (eluent: petroleum ether/EtOAc, 3/1) to give **56f'** in quantitative yield (Scheme S18).

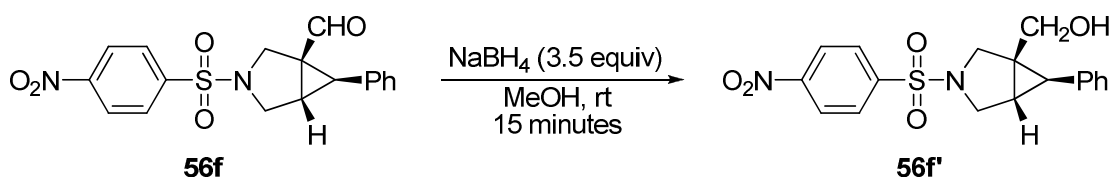

## Scheme S18

### Compound **56a**

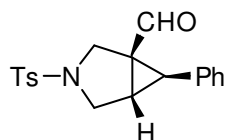

It is a known compound.<sup>[7]</sup> White solid; m.p. 119.8-120.9 °C. Absolute stereochemistry was assigned by analogy to compound **54**,  $[\alpha]_D^{20} = -44.6$  (*c* 0.5, CHCl<sub>3</sub>), 65% *ee*. IR (direct irradiation)  $\nu$  3059, 3028, 2959, 2925, 2870, 2853, 2739, 1687, 1598, 1497, 1344, 1253, 1162, 1099, 1084, 1047, 1017, 990, 956, 808, 783, 730, 697, 666, 644 cm<sup>-1</sup>. <sup>1</sup>H NMR (400 MHz, CDCl<sub>3</sub>, TMS)  $\delta$  2.44 (s, 3H), 2.84 (dd, *J* = 4.4, 5.2 Hz, 1H), 3.11 (d, *J* = 5.2 Hz, 1H), 3.18 (dd, *J* = 4.0, 9.6 Hz, 1H), 3.47 (d, *J* = 10.4 Hz, 1H), 3.73 (d, *J* = 10.0 Hz, 1H), 3.83 (d, *J* = 9.6 Hz, 1H), 7.24-7.37 (m, 7H), 7.72 (d, *J* = 8.4 Hz, 2H), 8.70 (s, 1H); <sup>13</sup>C NMR (100 MHz, CDCl<sub>3</sub>, TMS)  $\delta$  21.5, 29.7, 34.1, 44.8, 48.0, 49.1, 127.6, 128.81, 128.85, 129.8, 132.4, 133.2, 144.0, 197.3. LRMS (ESI) *m/e* 359.1 [M<sup>+</sup>+NH<sub>4</sub>]; HRMS (ESI) calcd for [C<sub>19</sub>H<sub>19</sub>NO<sub>3</sub>S+NH<sub>4</sub>] requires 359.1429, found 359.1417 [M<sup>+</sup>+NH<sub>4</sub>].

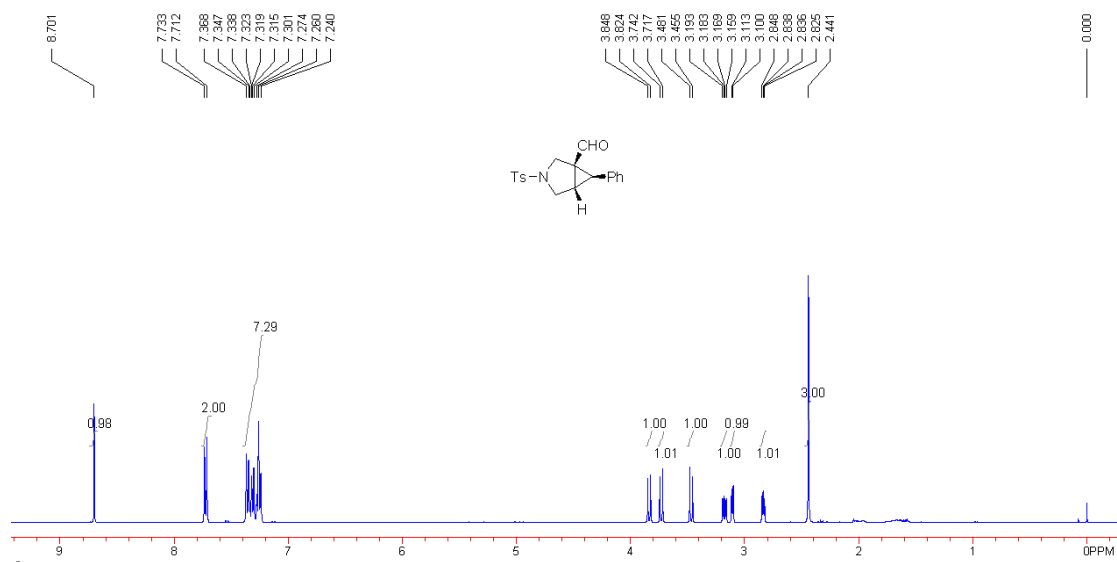

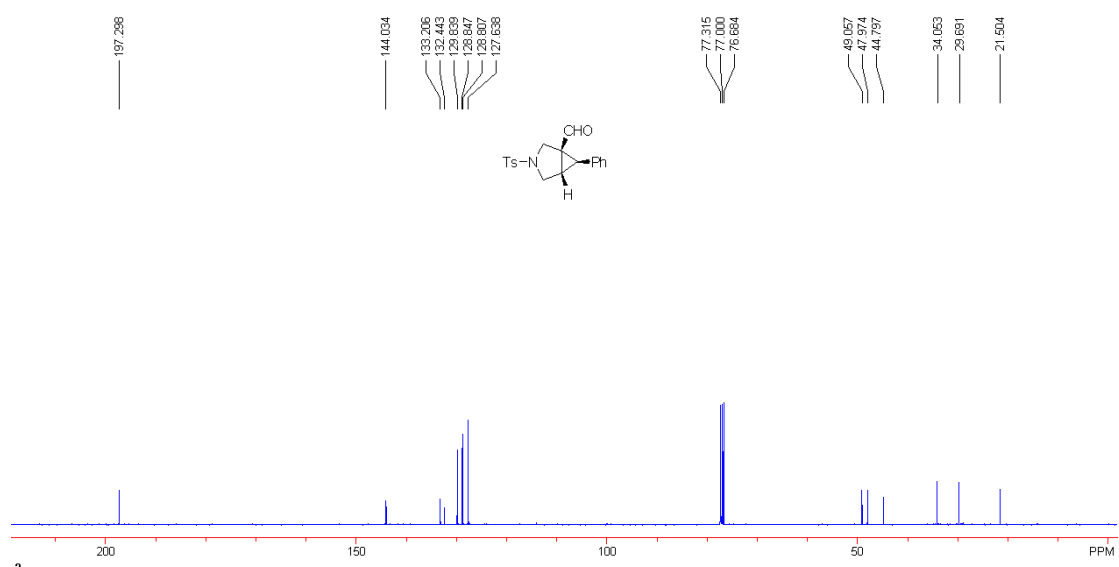

## WH-500 Chiral HPLC Analysis Report:

ID; Content; Retention time; Peak height; Peak area; Concentration; Tailing effect; Theoretic tower plates

## WH-500 色谱分析报告

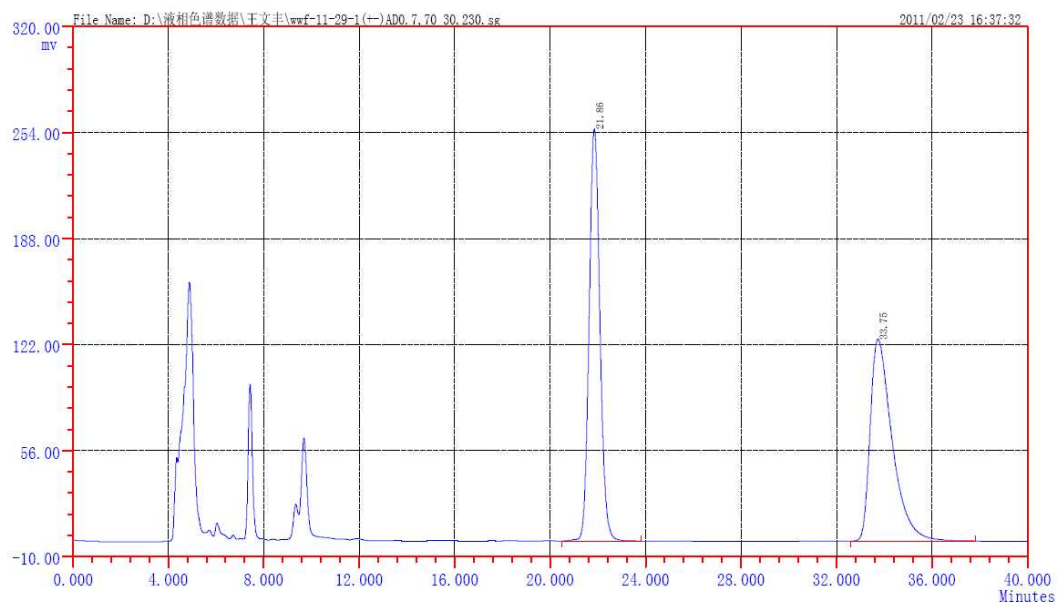

| ID | 组分名 | 保留时间   | 峰高     | 峰面积        | 浓度       | 拖尾因子 | 理论塔板 |
|----|-----|--------|--------|------------|----------|------|------|
| 1  |     | 21.855 | 256760 | 8069651.3  | 50.0400  | 1.10 | 9638 |
| 2  |     | 33.745 | 125654 | 8056744.6  | 49.9600  | 1.73 | 5520 |
| Σ: |     |        | 382414 | 16126395.9 | 100.0000 |      |      |

## WH-500 色谱分析报告

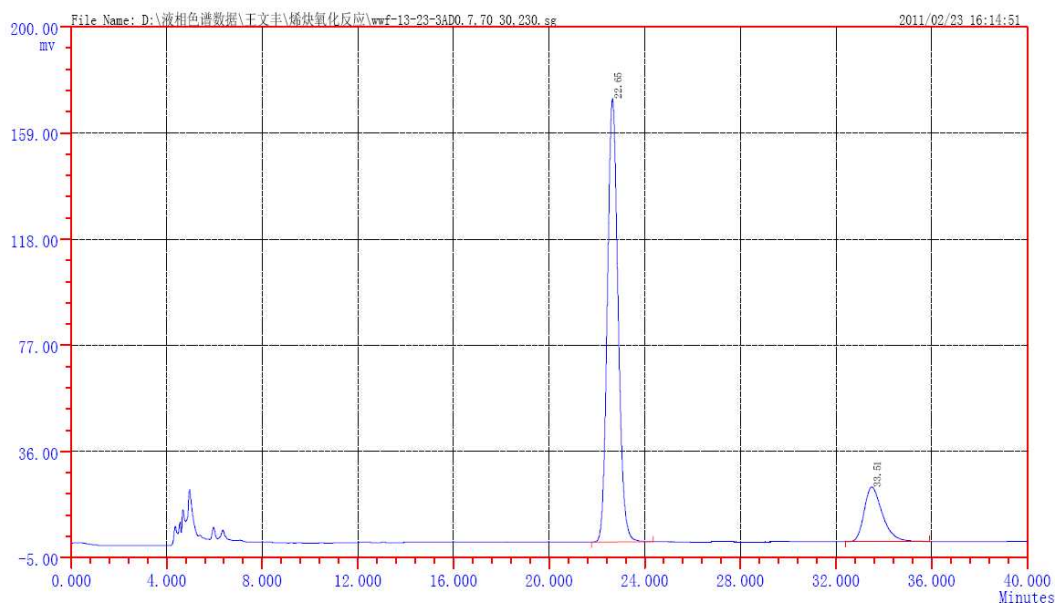

| ID         | 组分名 | 保留时间   | 峰高     | 峰面积       | 浓度       | 拖尾因子 | 理论塔板  |
|------------|-----|--------|--------|-----------|----------|------|-------|
| 1          |     | 22.653 | 171293 | 5329036.7 | 82.5786  | 1.12 | 10567 |
| 2          |     | 33.505 | 21110  | 1124249.9 | 17.4214  | 1.38 | 7889  |
| $\Sigma$ : |     |        | 192403 | 6453286.6 | 100.0000 |      |       |

[HPLC conditions: Chiracel AD-H column, hexane/2-propanol = 70:30, flow rate = 0.7 mL·min<sup>-1</sup>, wavelength = 230 nm,  $t_R$  = 22.7 min (major),  $t_R$  = 33.5 min (minor)].

### Compound **56c**

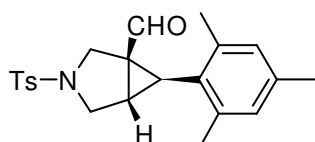

White solid; m.p. 132.5-133.5 °C. Absolute stereochemistry was assigned by analogy to compound **56a**,  $[\alpha]_D^{20} = +4.6$  (*c* 0.5, CHCl<sub>3</sub>), 58% *ee*. IR (direct irradiation)  $\nu$  2956, 2924, 2854, 2741, 1709,

1597, 1465, 1443, 1342, 1159, 1092, 1053, 1012, 953, 850, 813, 786, 710, 666, 648 cm<sup>-1</sup>. <sup>1</sup>H NMR (400 MHz, CDCl<sub>3</sub>, TMS)  $\delta$  2.17-2.39 (m, 6H, 2CH<sub>3</sub>), 2.24 (s, 3H), 2.44 (s, 3H), 2.57 (dd, *J* = 4.4, 6.0 Hz, 1H), 2.77 (d, *J* = 5.6 Hz, 1H), 3.18 (dd, *J* = 4.4, 10.0 Hz, 1H), 3.55 (d, *J* = 10.0 Hz, 1H), 3.74 (d, *J* = 9.6 Hz, 1H), 3.89 (d, *J* = 10.0 Hz, 1H), 6.82 (s, 2H), 7.35 (d, *J* = 8.0 Hz, 2H), 7.73 (d, *J* = 8.0 Hz, 2H), 8.52 (s, 1H) ( $\delta$  7.41-7.48 and 7.63-7.66 ppm were the signals attributed to minor containing Ph<sub>2</sub>SO); <sup>13</sup>C NMR (100 MHz, CDCl<sub>3</sub>, TMS)  $\delta$  20.7, 21.5, 31.4, 33.3, 44.9, 47.7, 49.1, 127.6, 127.8, 129.8, 132.5, 137.2, 144.0, 197.3 ( $\delta$  124.8, 129.3, 131.0, 145.6 were signals attributed to minor containing Ph<sub>2</sub>SO). LRMS (EI) *m/e* 383 (1.93%), 200 (38.48%), 185 (64.35%), 171 (91.89%), 157 (100%), 91 (84.53%); HRMS (EI)

calcd for  $[C_{22}H_{25}NO_3S]$  requires 383.1555, found 383.1553  $[M^+]$ .

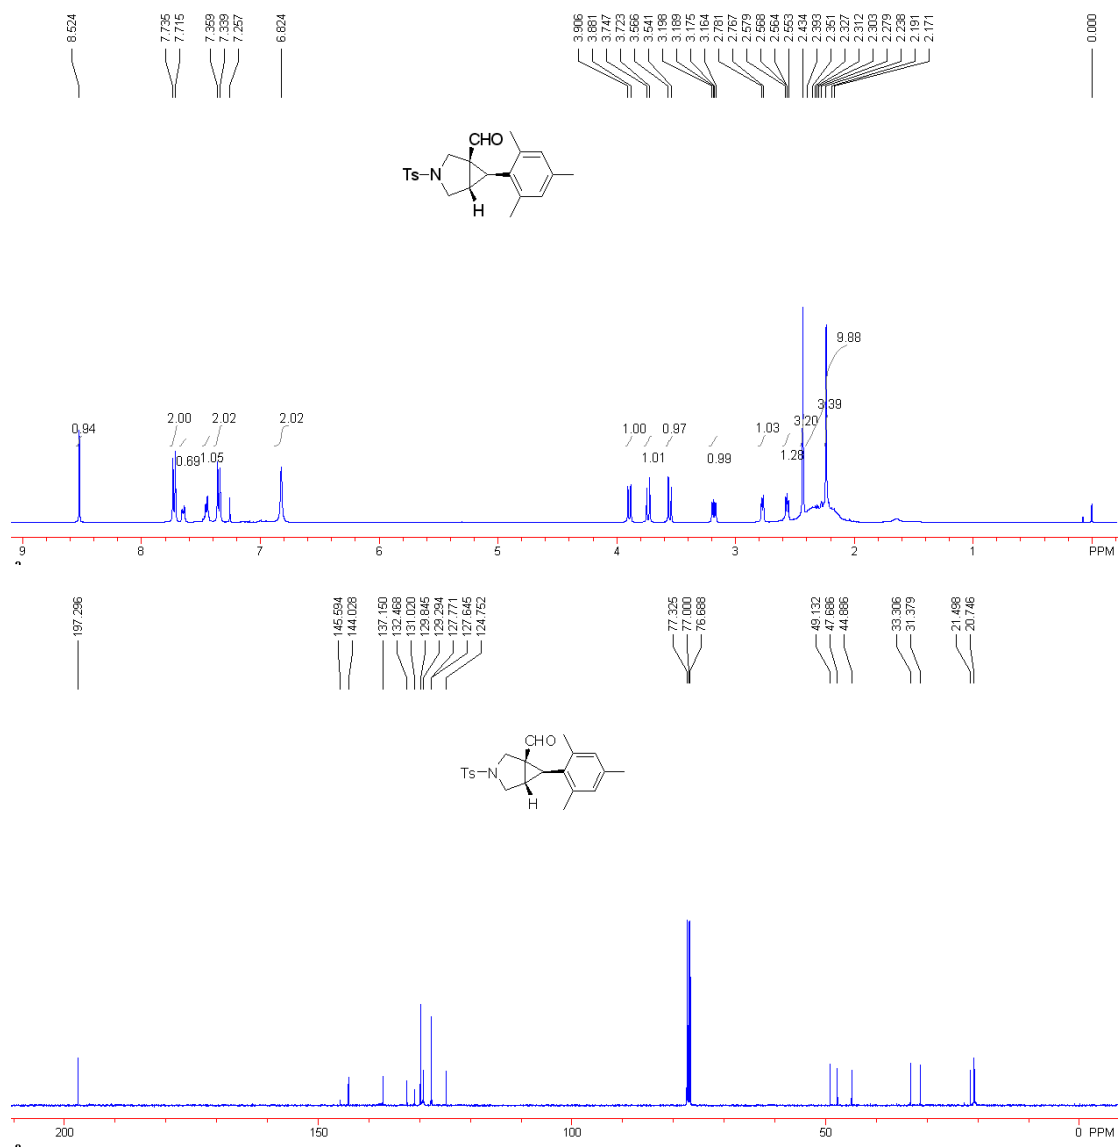

## WH-500 Chiral HPLC Analysis Report:

ID; Content; Retention time; Peak height; Peak area; Concentration; Tailing effect; Theoretic tower plates

## WH-500 色谱分析报告

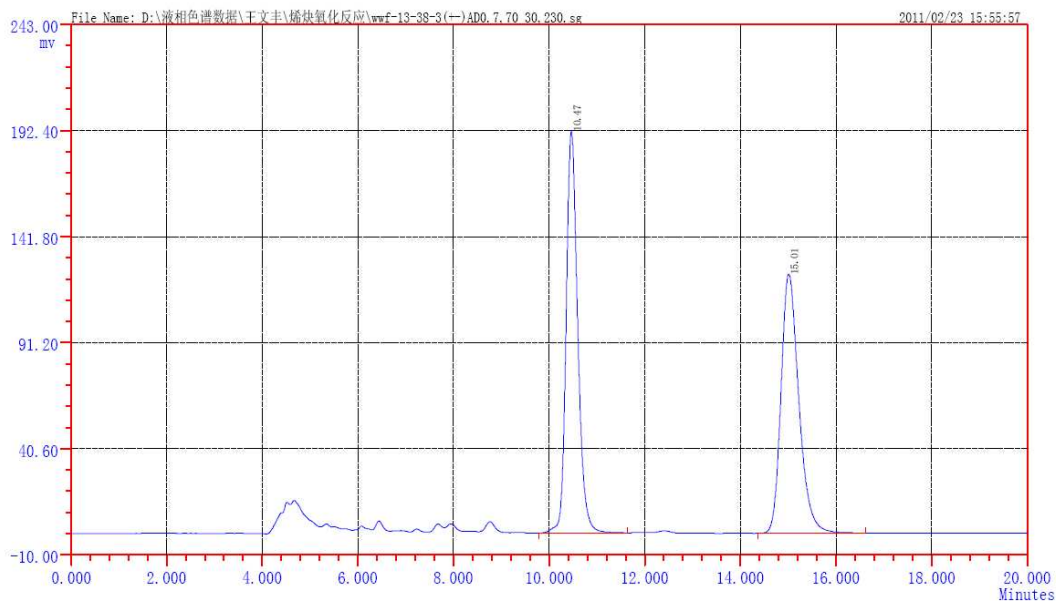

| ID | 组分名 | 保留时间   | 峰高     | 峰面积       | 浓度       | 拖尾因子 | 理论塔板 |
|----|-----|--------|--------|-----------|----------|------|------|
| 1  |     | 10.467 | 191658 | 3214941.5 | 50.0766  | 1.22 | 7760 |
| 2  |     | 15.013 | 123674 | 3205111.8 | 49.9234  | 1.29 | 6689 |
| Σ: |     |        | 315332 | 6420053.3 | 100.0000 |      |      |

## WH-500 色谱分析报告

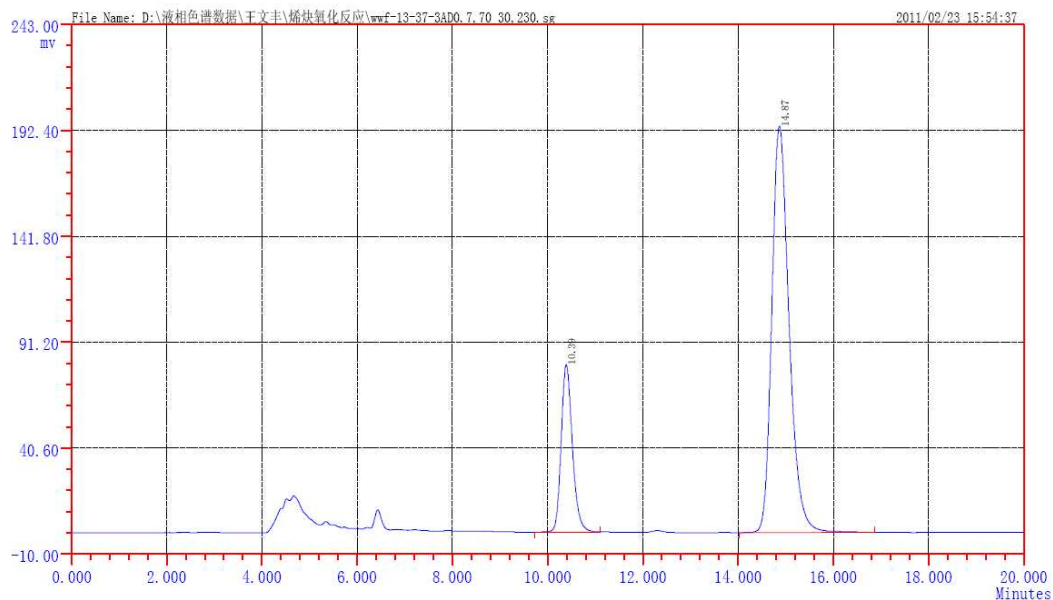

| ID | 组分名 | 保留时间   | 峰高     | 峰面积       | 浓度       | 拖尾因子 | 理论塔板 |
|----|-----|--------|--------|-----------|----------|------|------|
| 1  |     | 10.393 | 80079  | 1316038.5 | 21.1566  | 1.21 | 7971 |
| 2  |     | 14.870 | 194247 | 4904436.2 | 78.8434  | 1.28 | 6913 |
| Σ: |     |        | 274326 | 6220474.6 | 100.0000 |      |      |

[HPLC conditions: Chiracel AD-H column, hexane/2-propanol = 70:30, flow rate = 0.7

$\text{mL}\cdot\text{min}^{-1}$ , wavelength = 230 nm,  $t_R$  = 10.4 min (minor),  $t_R$  = 14.9 min (major)].

### Compound **56d**

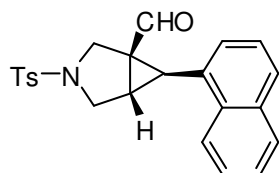

White solid; m.p. 173.3-174.3 °C. Absolute stereochemistry was assigned by analogy to compound **56a**,  $[\alpha]_D^{20} = +66.8$  (c 0.5,  $\text{CHCl}_3$ ), 64% *ee*. IR (direct irradiation)  $\nu$  3069, 2925, 2854, 1693, 1597, 1347, 1308, 1240, 1162, 1099, 1064, 1043, 1012, 954, 822, 809, 778, 711, 666, 633  $\text{cm}^{-1}$ .  $^1\text{H}$  NMR (400 MHz,  $\text{CDCl}_3$ , TMS)  $\delta$  2.42 (s, 3H), 2.96 (dd,  $J$  = 4.0, 4.8 Hz, 1H), 3.28 (dd,  $J$  = 4.0, 9.6 Hz, 1H), 3.36 (d,  $J$  = 5.2 Hz, 1H), 3.61 (d,  $J$  = 10.0 Hz, 1H), 3.95 (d,  $J$  = 2.8 Hz, 1H), 3.97 (d,  $J$  = 3.6 Hz, 1H), 7.36 (d,  $J$  = 7.6 Hz, 2H), 7.39-7.46 (m, 2H), 7.50-7.58 (m, 2H), 7.77 (d,  $J$  = 8.0 Hz, 2H), 7.80 (d,  $J$  = 8.8 Hz, 1H), 7.85-7.91 (m, 2H), 8.34 (s, 1H);  $^{13}\text{C}$  NMR (100 MHz,  $\text{CDCl}_3$ , TMS)  $\delta$  21.5, 30.1, 32.0, 45.0, 47.8, 49.2, 123.4, 125.1, 126.2, 126.4, 127.1, 127.7, 128.7, 128.8, 129.8, 129.9, 132.46, 132.53, 133.5, 144.1, 196.7. LRMS (EI)  $m/e$  391 (2.18%), 208 (29.86%), 179 (100%), 165 (27.35%), 141 (20.54%), 91 (48.00%); HRMS (EI) calcd for  $[\text{C}_{23}\text{H}_{21}\text{NO}_3\text{S}]$  requires 391.1242, found 391.1244  $[\text{M}^+]$ .

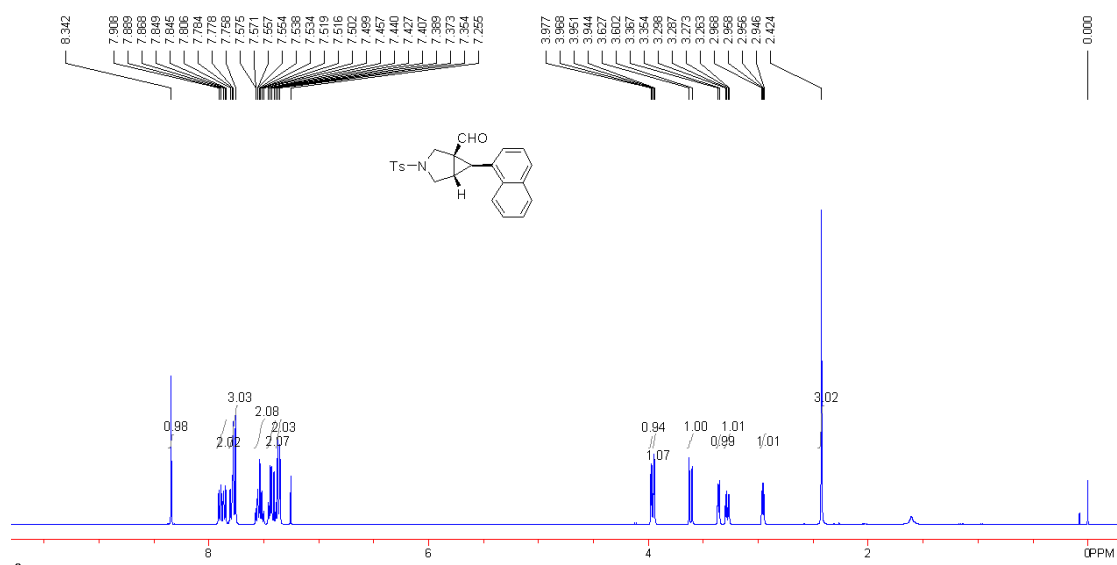

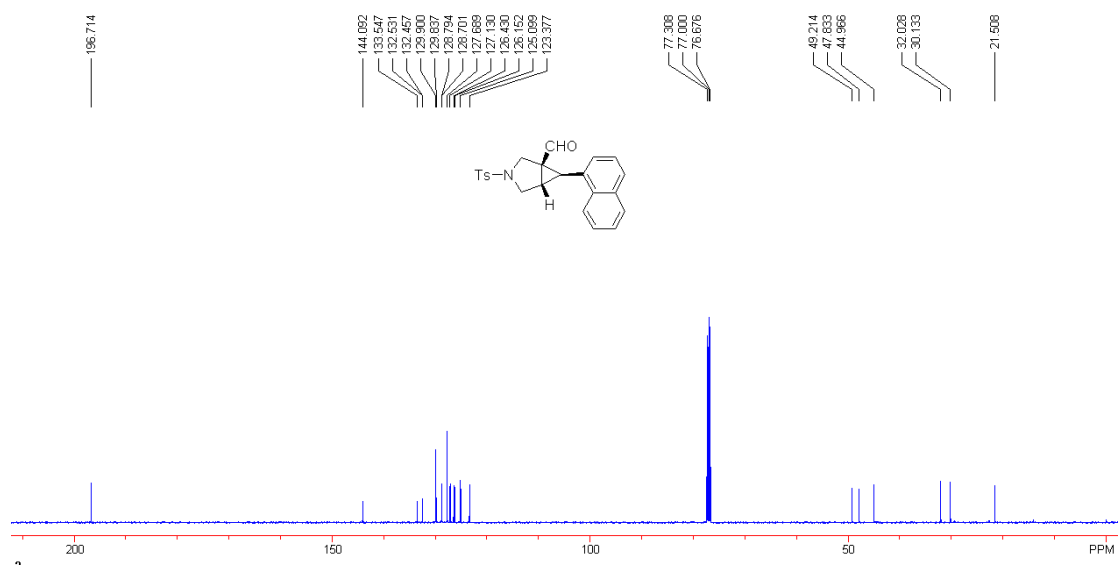

## WH-500 Chiral HPLC Analysis Report:

ID; Content; Retention time; Peak height; Peak area; Concentration; Tailing effect; Theoretic tower plates

## WH-500 色谱分析报告

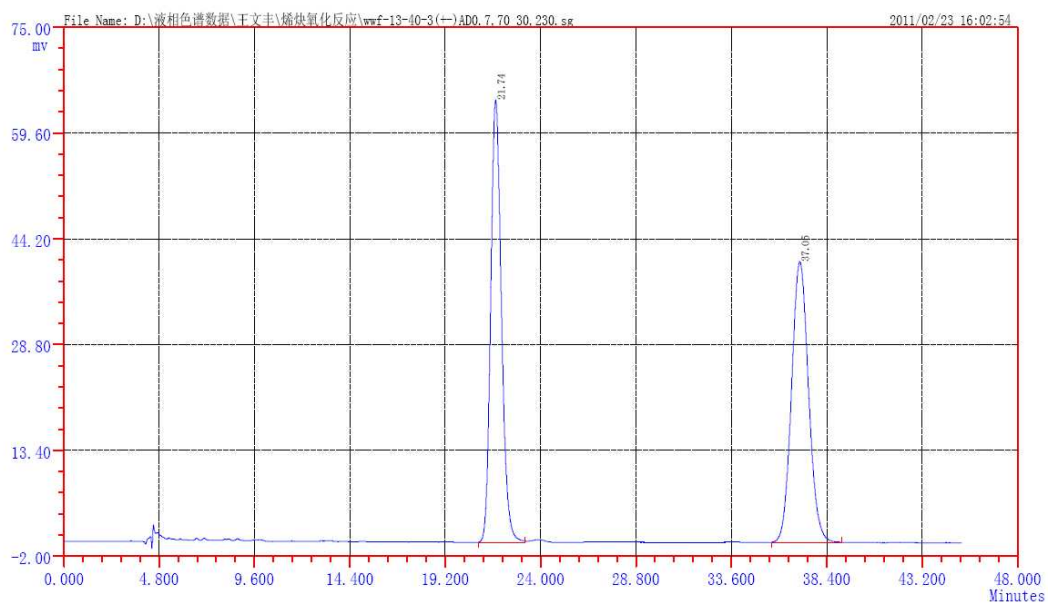

| ID | 组分名 | 保留时间   | 峰高     | 峰面积       | 浓度       | 拖尾因子 | 理论塔板 |
|----|-----|--------|--------|-----------|----------|------|------|
| 1  |     | 21.737 | 64429  | 2413774.8 | 49.8163  | 1.19 | 6709 |
| 2  |     | 37.047 | 40883  | 2431579.7 | 50.1837  | 1.09 | 7733 |
| Σ: |     |        | 105312 | 4845354.5 | 100.0000 |      |      |

## WH-500 色谱分析报告

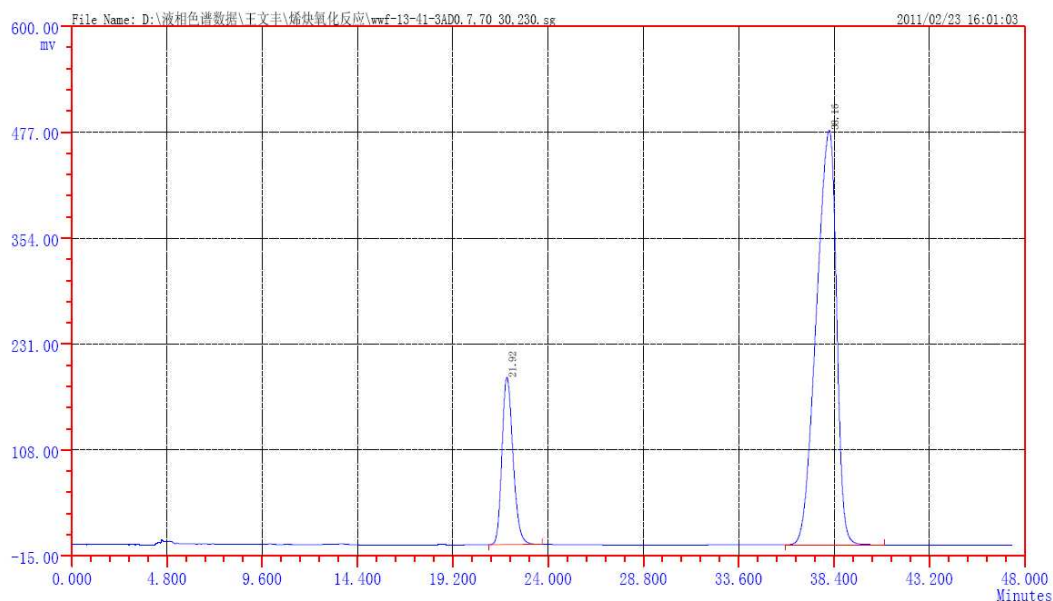

| ID | 组分名 | 保留时间   | 峰高     | 峰面积        | 浓度       | 拖尾因子 | 理论塔板 |
|----|-----|--------|--------|------------|----------|------|------|
| 1  |     | 21.923 | 193921 | 7519757.6  | 18.1932  | 1.23 | 6371 |
| 2  |     | 38.160 | 481371 | 33813068.6 | 81.8068  | 0.81 | 5882 |
| Σ: |     |        | 675292 | 41332826.1 | 100.0000 |      |      |

[HPLC conditions: Chiracel AD-H column, hexane/2-propanol = 70:30, flow rate = 0.7 mL·min<sup>-1</sup>, wavelength = 230 nm,  $t_R$  = 21.9 min (minor),  $t_R$  = 38.2 min (major)].

### Compound **56e**

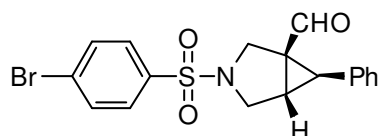

White solid; m.p. 117.1-118.2 °C. Absolute stereochemistry was assigned by analogy to compound **56a**,  $[\alpha]_D^{20} = -31.6$  ( $c$  0.5, CHCl<sub>3</sub>), 70% *ee*. IR (direct irradiation)  $\nu$  3057, 2924, 2852,

1691, 1576, 1470, 1442, 1388, 1345, 1163, 1099, 1068, 1047, 1023, 1010, 948, 809, 783, 740, 694, 646, 627 cm<sup>-1</sup>. <sup>1</sup>H NMR (400 MHz, CDCl<sub>3</sub>, TMS)  $\delta$  2.86 (dd,  $J$  = 4.4, 4.8 Hz, 1H), 3.10 (d,  $J$  = 5.6 Hz, 1H), 3.20 (dd,  $J$  = 4.0, 9.6 Hz, 1H), 3.49 (d,  $J$  = 9.6 Hz, 1H), 3.74 (d,  $J$  = 10.0 Hz, 1H), 3.85 (d,  $J$  = 9.6 Hz, 1H), 7.25-7.34 (m, 5H), 7.70 (s, 4H), 8.71 (s, 1H) ( $\delta$  7.41-7.48 and 7.63-7.66 ppm were the signals attributed to minor containing Ph<sub>2</sub>SO); <sup>13</sup>C NMR (100 MHz, CDCl<sub>3</sub>, TMS)  $\delta$  29.6, 34.1, 44.7, 48.1, 49.1, 127.7, 128.3, 128.8, 128.9, 129.0, 132.6, 133.0, 134.7, 197.0 ( $\delta$  124.7, 129.3, 131.0, 145.6 were signals attributed to minor containing Ph<sub>2</sub>SO). LRMS (EI)  $m/e$  405, 202 (100%), 154 (80.9%), 109 (92.18%), 77 (89.78%), 51 (86.70%); HRMS (EI) calcd for [C<sub>18</sub>H<sub>16</sub>NO<sub>3</sub>BrS] requires 405.0034, found 405.0036 [M<sup>+</sup>].

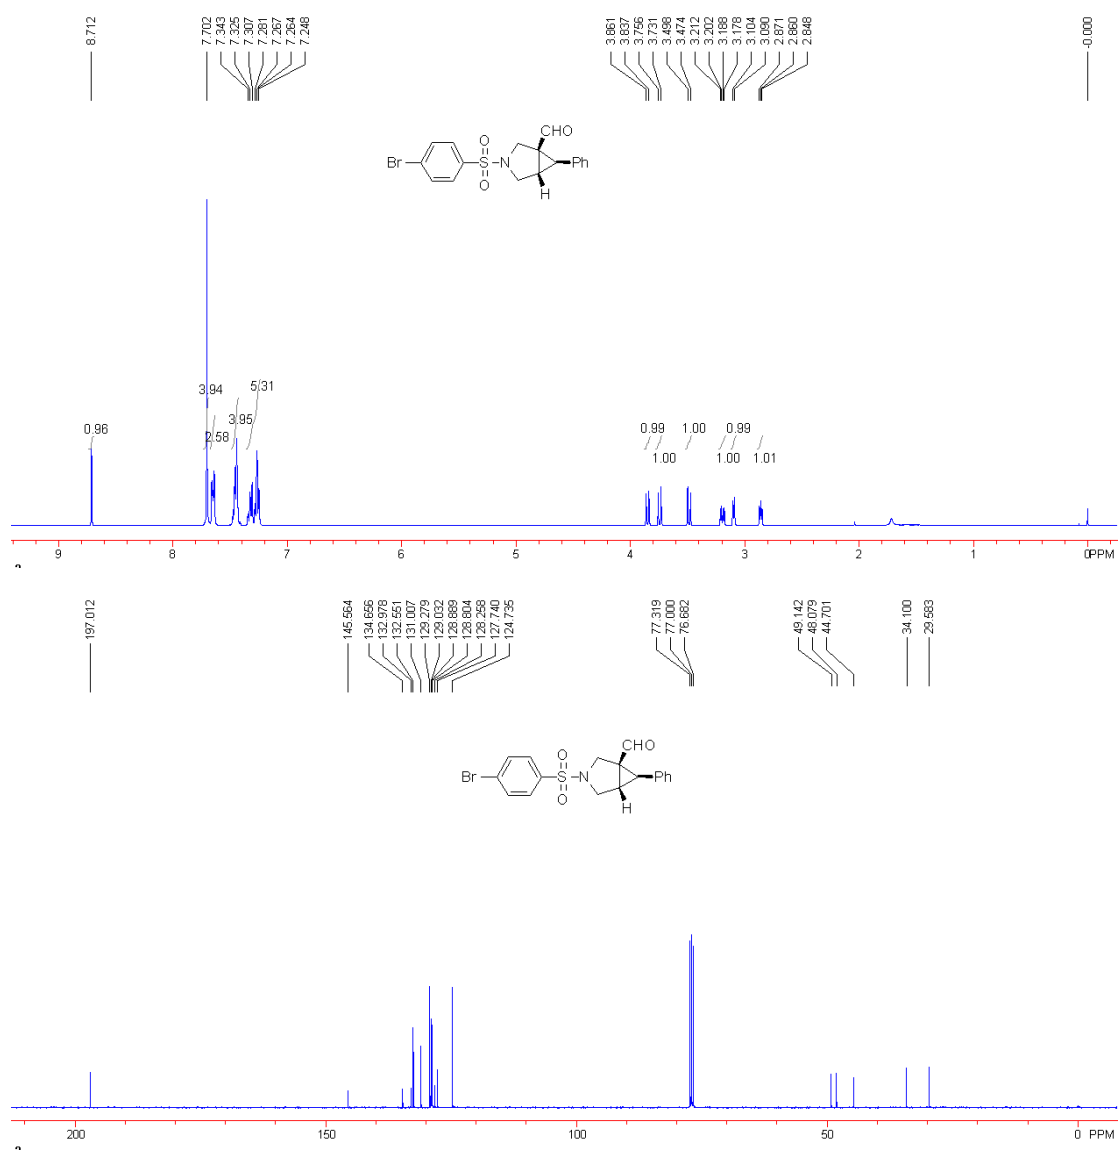

## WH-500 Chiral HPLC Analysis Report:

ID; Content; Retention time; Peak height; Peak area; Concentration; Tailing effect; Theoretic tower plates

## WH-500 色谱分析报告

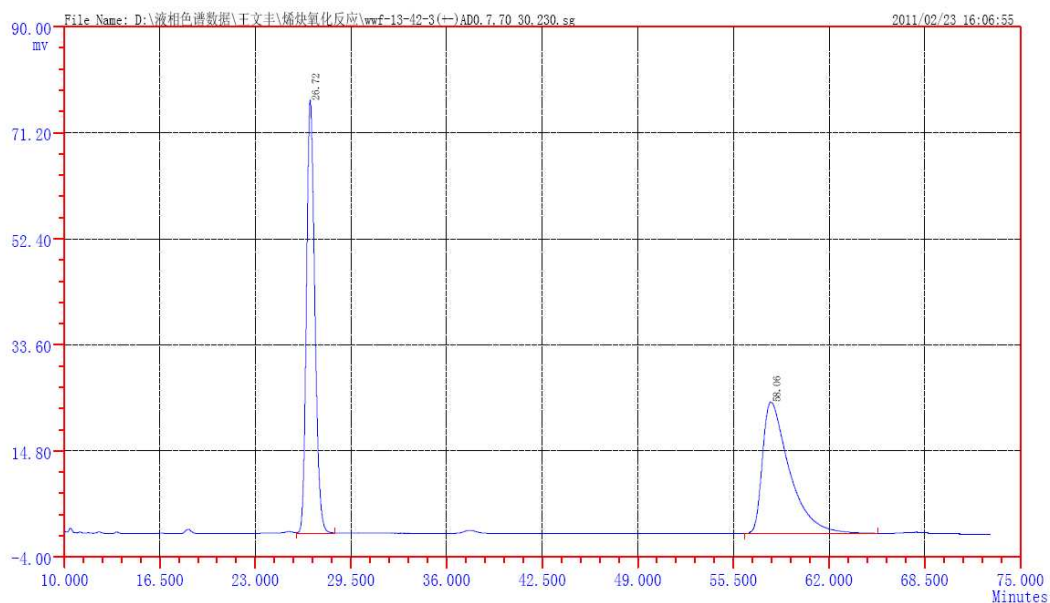

| ID | 组分名 | 保留时间   | 峰高     | 峰面积       | 浓度       | 拖尾因子 | 理论塔板 |
|----|-----|--------|--------|-----------|----------|------|------|
| 1  |     | 26.718 | 76811  | 3024611.3 | 50.2709  | 1.21 | 9176 |
| 2  |     | 58.062 | 23369  | 2992018.3 | 49.7291  | 2.07 | 4099 |
| Σ: |     |        | 100180 | 6016629.6 | 100.0000 |      |      |

## WH-500 色谱分析报告

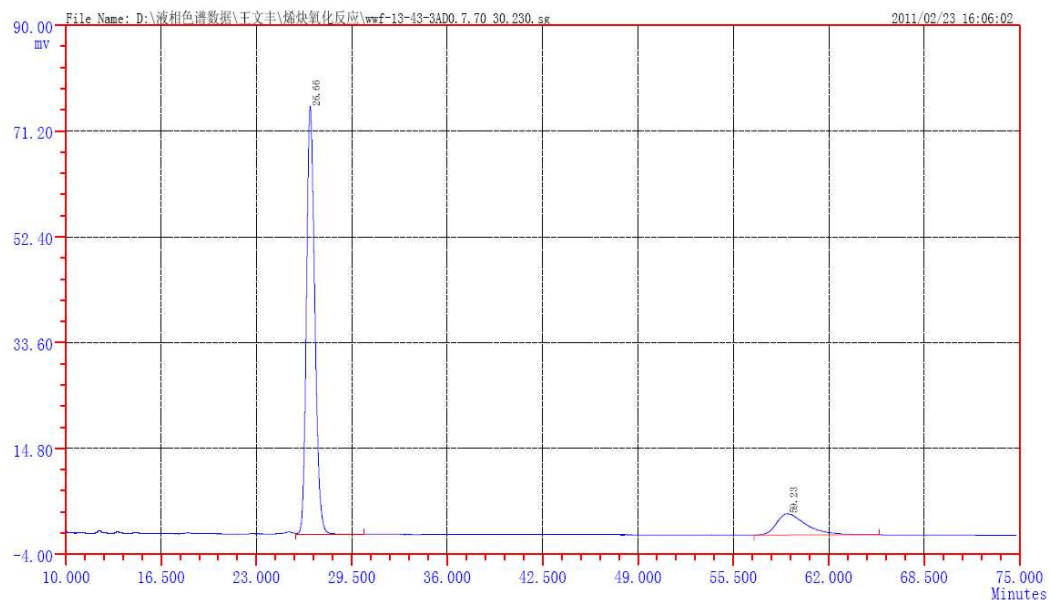

| ID | 组分名 | 保留时间   | 峰高    | 峰面积       | 浓度       | 拖尾因子 | 理论塔板 |
|----|-----|--------|-------|-----------|----------|------|------|
| 1  |     | 26.660 | 76074 | 2998909.7 | 84.8514  | 1.20 | 9116 |
| 2  |     | 59.225 | 3789  | 535399.7  | 15.1486  | 1.67 | 3501 |
| Σ: |     |        | 79863 | 3534309.4 | 100.0000 |      |      |

[HPLC conditions: Chiracel AD-H column, hexane/2-propanol = 70:30, flow rate = 0.7 mL·min<sup>-1</sup>, wavelength = 230 nm,  $t_R$  = 26.7 min (major),  $t_R$  = 59.2 min (minor)].

Compound **56f**

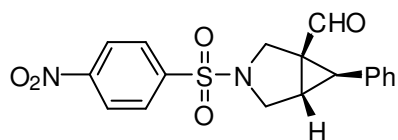

White solid; m.p. 180.0-181.2 °C. Absolute stereochemistry was assigned by analogy to compound **56a**,  $[\alpha]_D^{20} = -35.0$  ( $c$  0.5,  $\text{CHCl}_3$ ), 66% *ee*. IR (direct irradiation)  $\nu$  2925, 2855, 1694, 1607, 1543, 1350, 1306, 1237, 1165, 1097, 1049, 1020, 956, 855, 809, 783, 736, 686, 629  $\text{cm}^{-1}$ .  $^1\text{H}$  NMR (400 MHz,  $\text{CDCl}_3$ , TMS)  $\delta$  2.89 (dd,  $J = 4.4, 4.8$  Hz, 1H), 3.11 (d,  $J = 5.2$  Hz, 1H), 3.26 (dd,  $J = 4.0, 9.2$  Hz, 1H), 3.54 (d,  $J = 10.0$  Hz, 1H), 3.81 (d,  $J = 10.0$  Hz, 1H), 3.93 (d,  $J = 10.0$  Hz, 1H), 7.26-7.36 (m, 5H), 8.04 (d,  $J = 8.8$  Hz, 2H), 8.42 (d,  $J = 8.8$  Hz, 2H), 8.71 (s, 1H);  $^{13}\text{C}$  NMR (100 MHz,  $\text{CDCl}_3$ , TMS)  $\delta$  29.5, 34.2, 44.6, 48.2, 49.3, 124.6, 127.9, 128.7, 128.8, 129.0, 132.7, 141.6, 150.4, 196.8. LRMS (EI)  $m/e$  372.1 (3.0%), 186.1 (19.5%), 157.0 (42.52%), 129.1 (100%), 115.1 (18.20%), 91.1 (29.20%); HRMS (EI) calcd for  $[\text{C}_{18}\text{H}_{16}\text{N}_2\text{O}_5\text{S}]$  requires 372.0780, found 372.0776  $[\text{M}^+]$ .

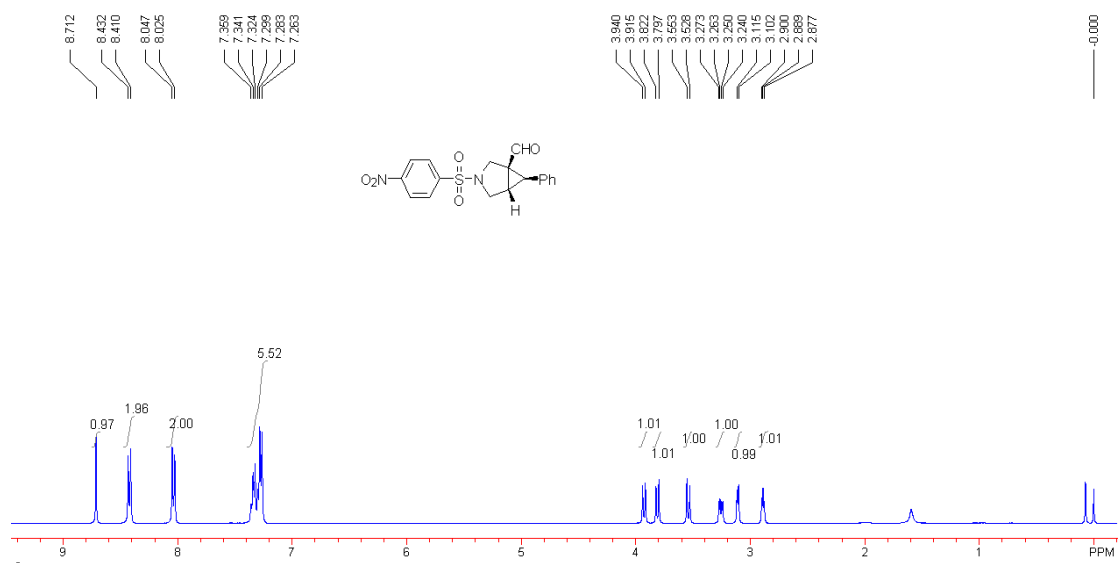

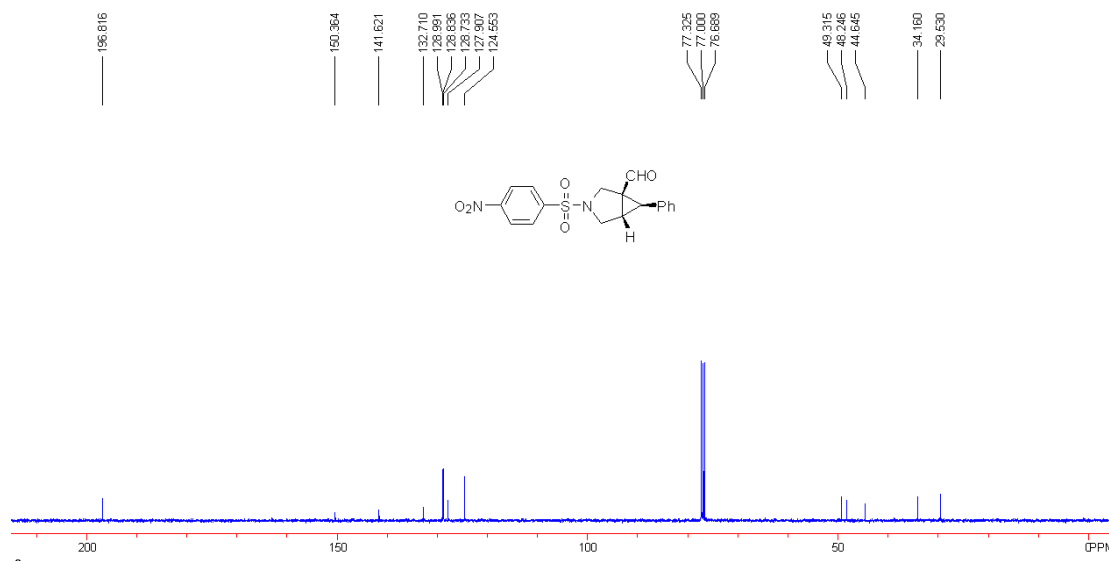

### Compound **56f'**

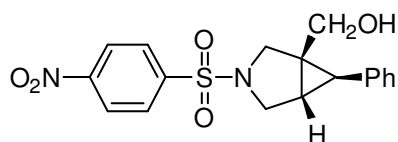

White solid; m.p. 148.9-150.1 °C. Absolute stereochemistry was assigned by analogy to compound **56a**, 66% *ee*. <sup>1</sup>H NMR (400 MHz, CDCl<sub>3</sub>, TMS) δ 1.11 (s, 1H), 1.99 (dd, *J* = 4.0, 4.4

Hz, 1H), 2.36 (d, *J* = 4.4 Hz, 1H), 3.30 (dd, *J* = 2.1, 9.6 Hz, 2H), 3.49 (s, 2H), 3.80 (d, *J* = 9.6 Hz, 1H), 3.92 (d, *J* = 9.6 Hz, 1H), 7.14 (d, *J* = 7.2 Hz, 2H), 7.21-7.32 (m, 3H), 8.03 (d, *J* = 8.8 Hz, 2H), 8.41 (d, *J* = 8.8 Hz, 2H); <sup>13</sup>C NMR (100 MHz, CDCl<sub>3</sub>, TMS) δ 24.4, 29.4, 36.7, 50.5, 53.1, 60.9, 124.4, 126.9, 128.4, 128.60, 128.64, 135.5, 142.5, 150.2. LRMS (EI) *m/e* 374.1 (1.11%), 268.1 (13.79%), 188.1 (24.94%), 129.1 (100%), 117.1 (44.57%), 91.1 (70.36%); HRMS (EI) calcd for [C<sub>18</sub>H<sub>18</sub>N<sub>2</sub>O<sub>5</sub>S] requires 374.0936, found 374.0932 [M<sup>+</sup>].

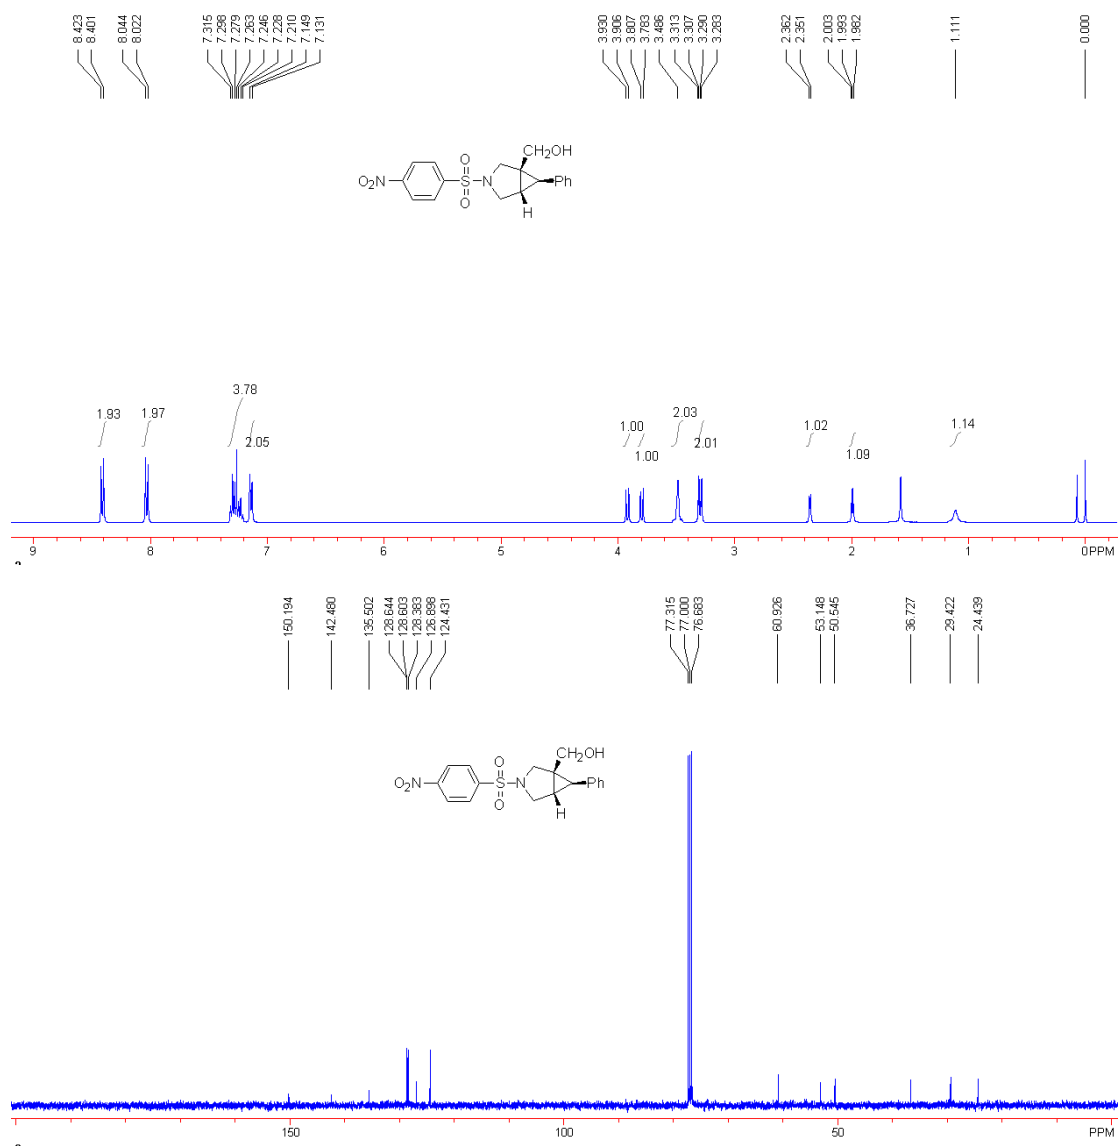

## WH-500 Chiral HPLC Analysis Report:

ID; Content; Retention time; Peak height; Peak area; Concentration; Tailing effect; Theoretic tower plates

## WH-500 色谱分析报告

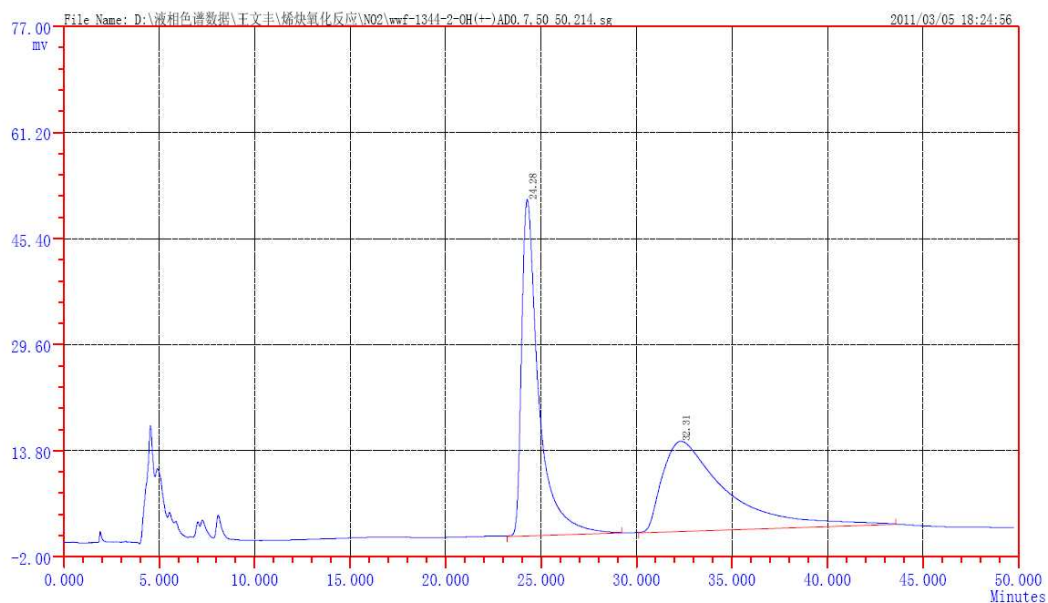

| ID | 组分名 | 保留时间   | 峰高    | 峰面积       | 浓度       | 拖尾因子 | 理论塔板 |
|----|-----|--------|-------|-----------|----------|------|------|
| 1  |     | 24.282 | 50144 | 3110940.0 | 49.8031  | 2.31 | 3053 |
| 2  |     | 32.307 | 13462 | 3135538.7 | 50.1969  | 3.85 | 383  |
| Σ: |     |        | 63606 | 6246478.7 | 100.0000 |      |      |

## WH-500 色谱分析报告

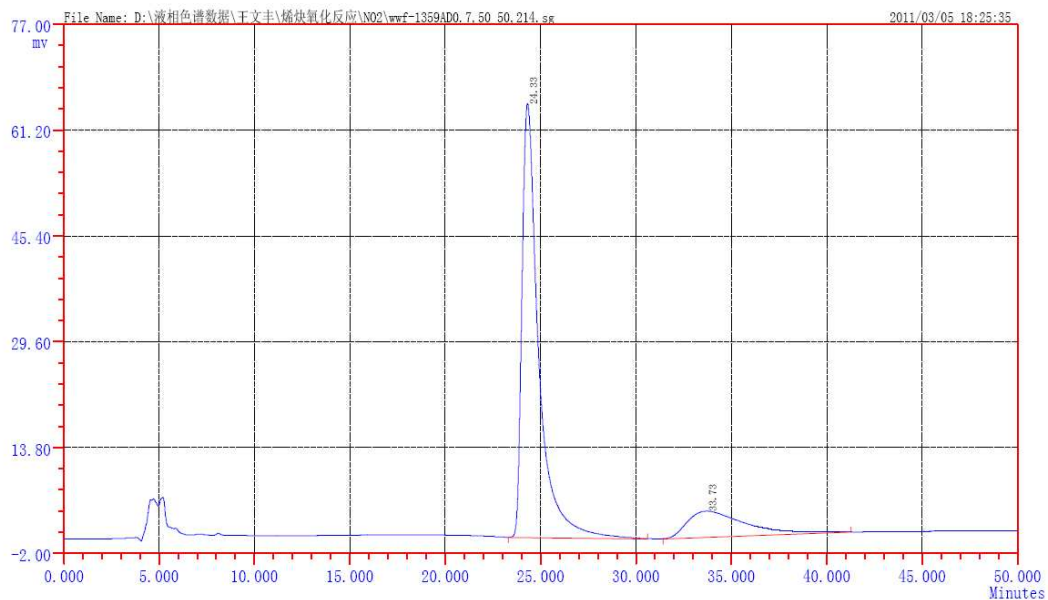

| ID | 组分名 | 保留时间   | 峰高    | 峰面积       | 浓度       | 拖尾因子 | 理论塔板 |
|----|-----|--------|-------|-----------|----------|------|------|
| 1  |     | 24.332 | 64873 | 3944422.8 | 82.8645  | 2.10 | 3192 |
| 2  |     | 33.735 | 3899  | 815665.3  | 17.1355  | 2.61 | 518  |
| Σ: |     |        | 68772 | 4760088.1 | 100.0000 |      |      |

[HPLC conditions: Chiracel AD-H column, hexane/2-propanol = 50:50, flow rate = 0.7 mL·min<sup>-1</sup>, wavelength = 214 nm,  $t_R$  = 24.3 min (major),  $t_R$  = 33.7 min (minor)].

## Compound **56g**

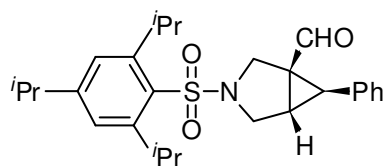

White solid; m.p. 55.9-56.9 °C. Absolute stereochemistry was assigned by analogy to compound **56a**,  $[\alpha]_D^{20} = -11.5$  (*c* 0.5, CHCl<sub>3</sub>), 10.3% *ee*. IR (direct irradiation)  $\nu$  2958, 2929, 2870, 1696, 1601, 1462, 1425, 1364, 1316, 1239, 1152, 1079, 1044, 1006, 953, 883, 844, 782, 732, 698, 675, 652 cm<sup>-1</sup>. <sup>1</sup>H NMR (400 MHz, CDCl<sub>3</sub>, TMS)  $\delta$  1.25-1.29 (m, 18H), 2.91 (hep, *J* = 6.8 Hz, 1H), 2.96 (dd, *J* = 4.4, 5.2 Hz, 1H), 3.09 (d, *J* = 5.2 Hz, 1H), 3.56 (dd, *J* = 4.0, 10.0 Hz, 1H), 3.61 (d, *J* = 10.4 Hz, 1H), 3.80 (d, *J* = 9.2 Hz, 1H), 3.82 (d, *J* = 10.0 Hz, 1H), 4.17 (hep, *J* = 6.8 Hz, 2H), 7.19 (s, 2H), 7.24-7.34 (m, 5H), 8.81 (s, 1H); <sup>13</sup>C NMR (100 MHz, CDCl<sub>3</sub>, TMS)  $\delta$  23.5, 24.88, 24.92, 29.5, 29.8, 34.0, 34.1, 45.0, 47.1, 47.8, 124.0, 127.6, 128.9, 130.8, 133.4, 151.3, 153.4, 197.4. LRMS (EI) *m/e* 453.2 (1.1%), 187 (97.97%), 158 (51.46%), 129 (100%), 96 (90.57%), 91 (76.79%); HRMS (EI) calcd for [C<sub>27</sub>H<sub>35</sub>NO<sub>3</sub>S] requires 453.2338, found 453.2335 [M<sup>+</sup>].

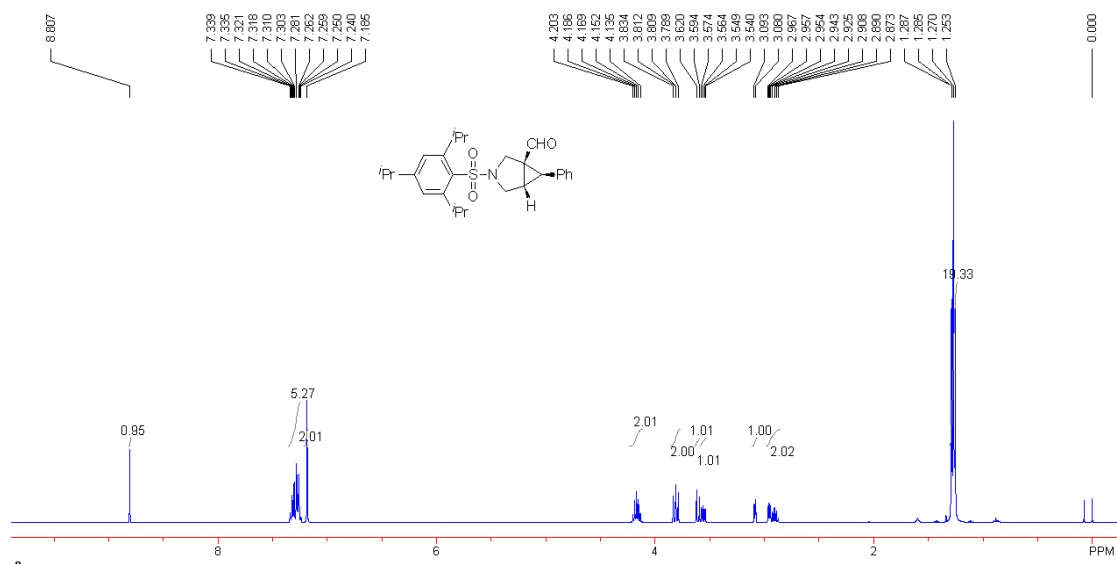

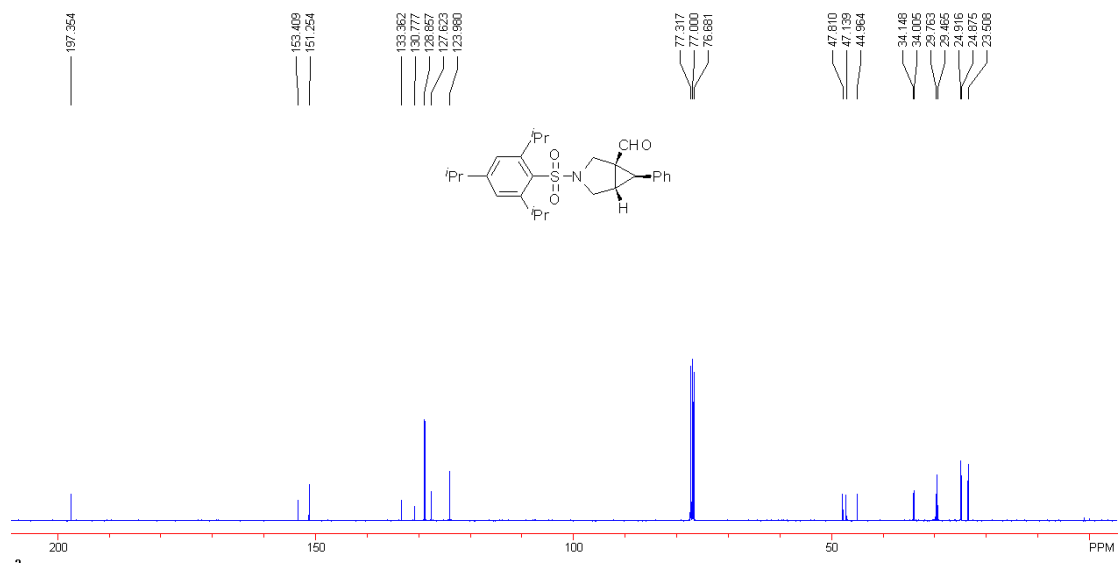

## WH-500 Chiral HPLC Analysis Report:

ID; Content; Retention time; Peak height; Peak area; Concentration; Tailing effect; Theoretic tower plates

## WH-500 色谱分析报告

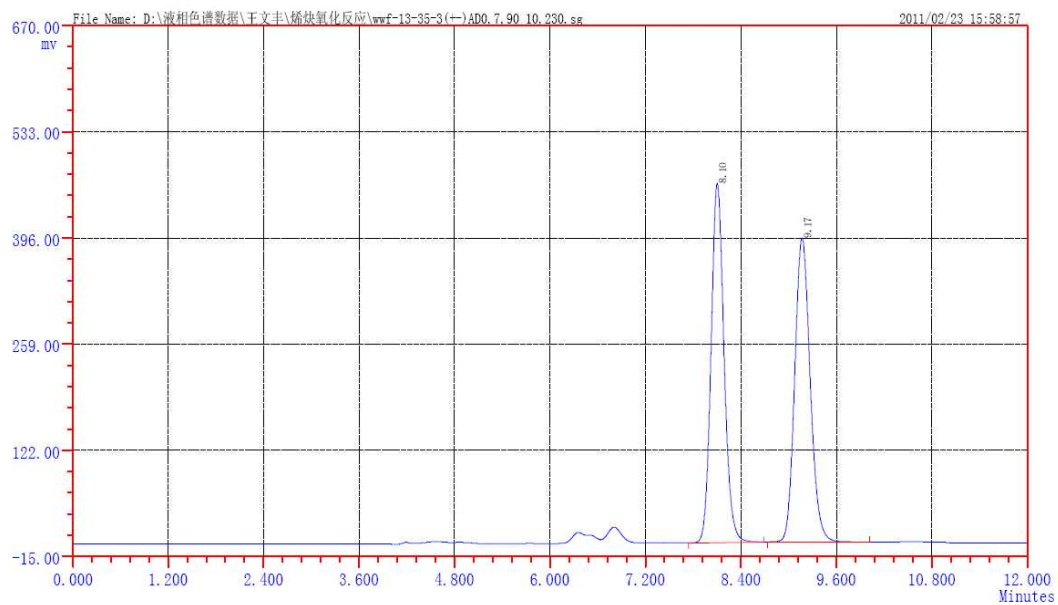

| ID | 组分名 | 保留时间  | 峰高     | 峰面积        | 浓度       | 拖尾因子 | 理论塔板  |
|----|-----|-------|--------|------------|----------|------|-------|
| 1  |     | 8.103 | 463930 | 5271877.4  | 49.8355  | 1.13 | 10135 |
| 2  |     | 9.172 | 392640 | 5306673.8  | 50.1645  | 1.13 | 9178  |
| Σ: |     |       | 856570 | 10578551.2 | 100.0000 |      |       |

## WH-500 色谱分析报告

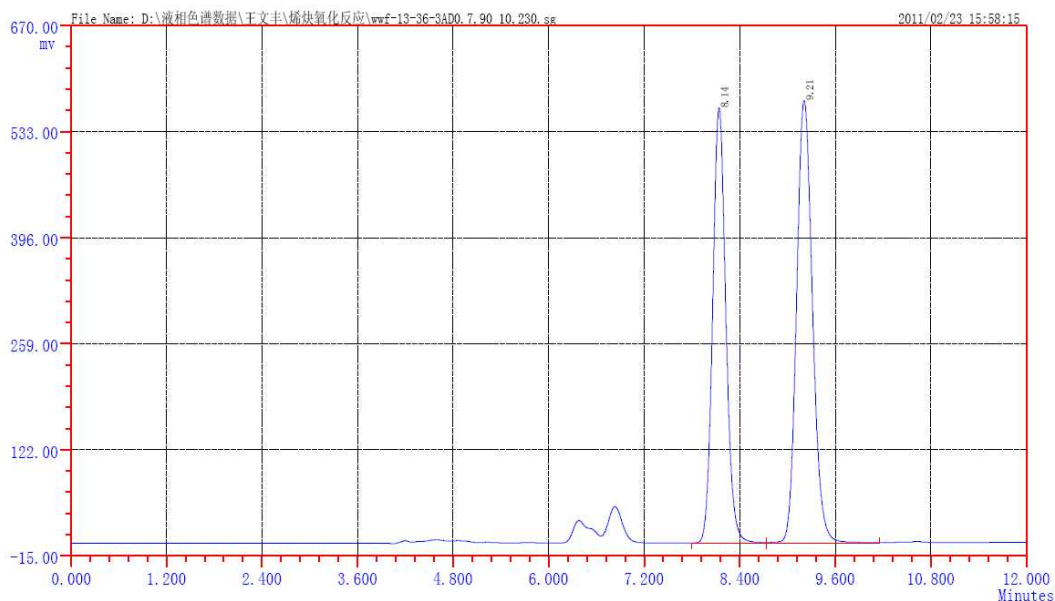

| ID | 组分名 | 保留时间  | 峰高      | 峰面积        | 浓度       | 拖尾因子 | 理论塔板 |
|----|-----|-------|---------|------------|----------|------|------|
| 1  |     | 8.142 | 562283  | 6473553.0  | 44.8628  | 1.10 | 9967 |
| 2  |     | 9.212 | 571780  | 7956099.8  | 55.1372  | 1.14 | 8735 |
| Σ: |     |       | 1134063 | 14429652.8 | 100.0000 |      |      |

[HPLC conditions: Chiracel AD-H column, hexane/2-propanol = 90:10, flow rate = 0.7 mL·min<sup>-1</sup>, wavelength = 230 nm,  $t_R$  = 8.1 min (minor),  $t_R$  = 9.2 min (major)].

### Compound **56h**

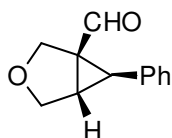

It is a known compound.<sup>[7]</sup> Colorless oil. Absolute stereochemistry was assigned by analogy to compound **56a**,  $[\alpha]_D^{20} = +3.6$  (*c* 0.5, CHCl<sub>3</sub>), 3.1% *ee*.

IR (direct irradiation)  $\nu$  2956, 2925, 2855, 2742, 1948, 1892, 1691, 1605, 1499, 1455, 1371, 1237, 1199, 1072, 1059, 1026, 909, 795, 779, 732, 696, 634 cm<sup>-1</sup>. <sup>1</sup>H NMR (400 MHz, CDCl<sub>3</sub>, TMS)  $\delta$  2.92 (d, *J* = 5.6 Hz, 1H), 2.98 (dd, *J* = 3.2, 5.6 Hz, 1H), 3.89 (dd, *J* = 2.8, 8.8 Hz, 1H), 4.02 (d, *J* = 9.2 Hz, 1H), 4.08 (d, *J* = 8.8 Hz, 1H), 4.20 (d, *J* = 9.2 Hz, 1H), 7.25-7.36 (m, 5H), 8.95 (s, 1H); <sup>13</sup>C NMR (100 MHz, CDCl<sub>3</sub>, TMS)  $\delta$  31.9, 33.4, 46.8, 68.0, 68.8, 127.4, 128.8, 128.9, 133.9, 198.2. LRMS (EI) *m/e* 188 (3.28%), 158 (39.63%), 129 (100%), 115 (32.57%), 91 (44.54%); HRMS (EI) calcd for [C<sub>12</sub>H<sub>12</sub>O<sub>2</sub>] requires 188.0837, found 188.0836 [*M*<sup>+</sup>].

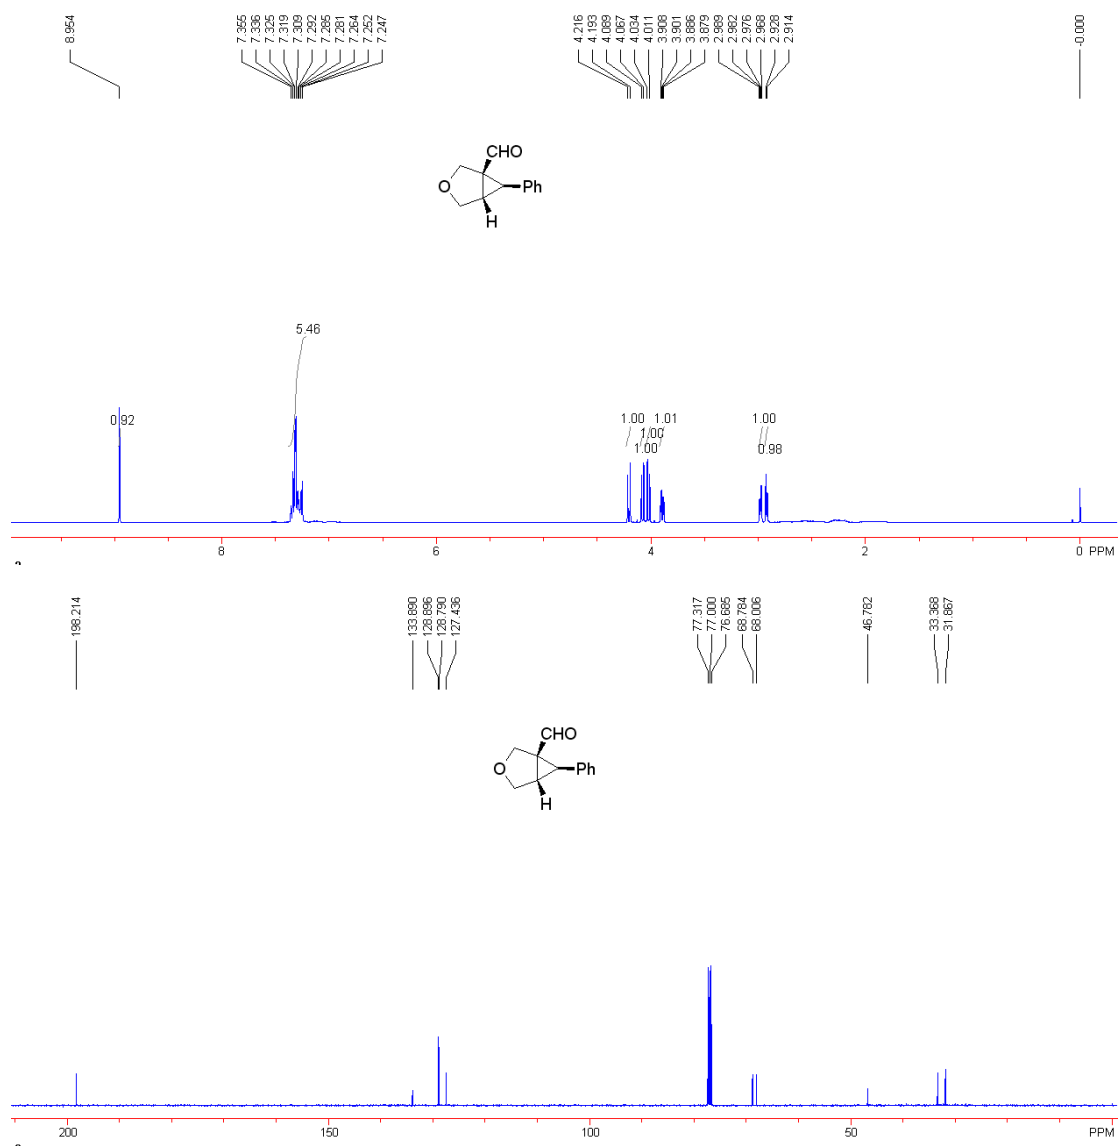

## WH-500 Chiral HPLC Analysis Report:

ID; Content; Retention time; Peak height; Peak area; Concentration; Tailing effect; Theoretic tower plates

## WH-500 色谱分析报告

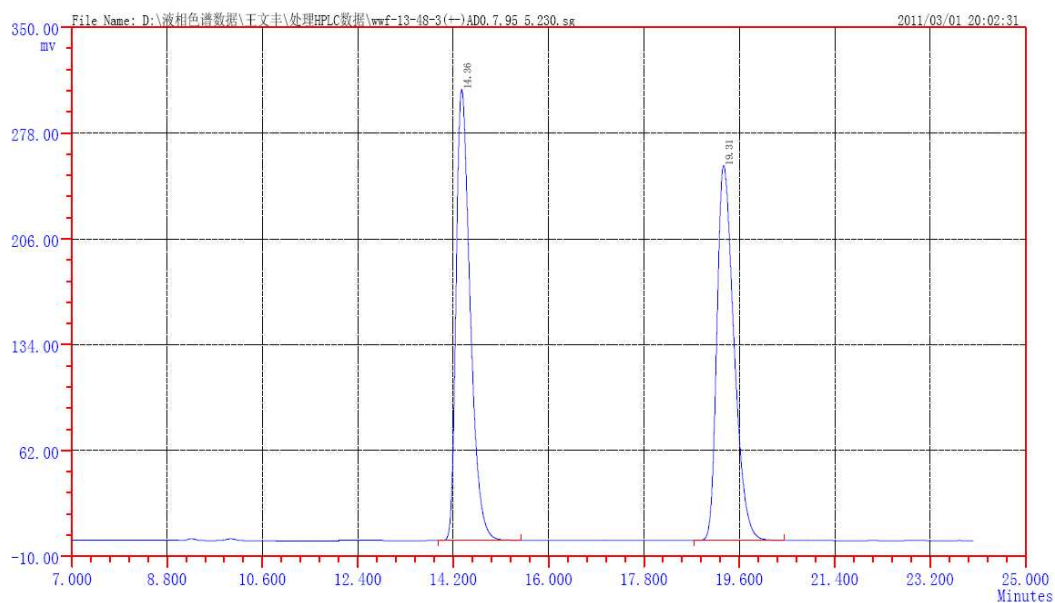

| ID | 组分名 | 保留时间   | 峰高     | 峰面积        | 浓度       | 拖尾因子 | 理论塔板  |
|----|-----|--------|--------|------------|----------|------|-------|
| 1  |     | 14.360 | 307155 | 5681617.7  | 49.7747  | 1.47 | 12012 |
| 2  |     | 19.307 | 255421 | 5733044.1  | 50.2253  | 1.41 | 14746 |
| Σ: |     |        | 562576 | 11414661.8 | 100.0000 |      |       |

## WH-500 色谱分析报告

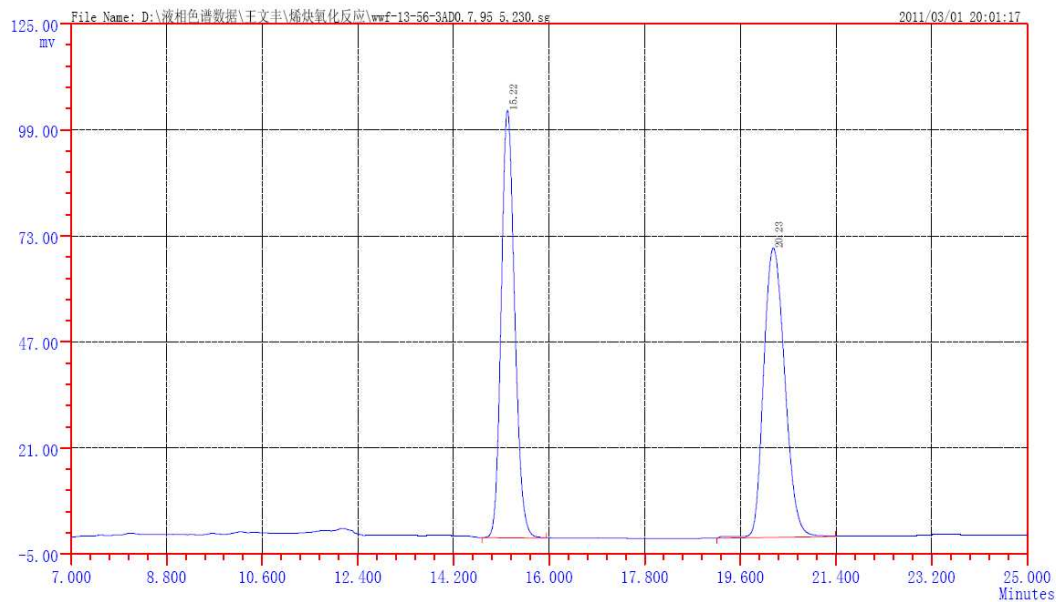

| ID | 组分名 | 保留时间   | 峰高     | 峰面积       | 浓度       | 拖尾因子 | 理论塔板  |
|----|-----|--------|--------|-----------|----------|------|-------|
| 1  |     | 15.218 | 104797 | 1847991.5 | 48.4683  | 1.15 | 14844 |
| 2  |     | 20.227 | 70945  | 1964792.8 | 51.5317  | 1.19 | 10631 |
| Σ: |     |        | 175742 | 3812784.3 | 100.0000 |      |       |

[HPLC conditions: Chiracel AD-H column, hexane/2-propanol = 95:5, flow rate = 0.7 mL·min<sup>-1</sup>, wavelength = 230 nm,  $t_R$  = 15.2 min (minor),  $t_R$  = 20.2 min (major)].

## (F) References.

1. Wang, W. F.; Zhang, T.; Shi, M. *Organometallics* **2009**, *28*, 2640-2642.
2. (a) Zhang, T.; Liu, S. J.; Shi, M.; Zhao, M. X. *Synthesis* **2008**, (17), 2819-2824. (b) Wang, W. F.; Zhang, T.; Wang, F. J.; Shi, M. *Tetrahedron* **2011**, *67*, 1523-1529.
3. Song, H. B.; Gu, L. N.; Zi, G. F. *J. Organomet. Chem.* **2009**, *694*, 1493-1502.
4. (a) Brummond, K. M.; Chen, H. F.; Sill, P.; You, L. F. *J. Am. Chem. Soc.* **2002**, *124*, 15186-15187. (b) Chao, C. M.; Genin, E.; Toullec, P. Y.; Genet, J. P.; Michelet, V. *J. Organomet. Chem.* **2009**, *694*, 538-545. (c) Xing, D.; Yang, D. *Org. Lett.* **2010**, *12*, 1068-1071. (d) Trost, B. M.; Toste, F. D. *J. Am. Chem. Soc.* **2002**, *124*, 5025-5036. (e) Miura, K.; Saito, H.; Fujisawa, N.; Hosomi, A. *J. Org. Chem.* **2000**, *65*, 8119-8122.
5. Charruault, L.; Michelet, V.; Taras, R.; Gladiali, S.; Genet, J. P. *Chem. Commun.* **2004**, 850-851.
6. Nieto-Oberhuber, C.; Munoz, M. P.; Lopez, S.; Jimenez-Nunez, E.; Nevado, C.; Herrero-Gomez, E.; Raducan, M.; Echavarren, A. M. *Chem. Eur. J.* **2006**, *12*, 1677-1693.
7. Witham, C. A.; Mauleon, P.; Shapiro, N. D.; Sherry, B. D.; Toste, F. D. *J. Am. Chem. Soc.* **2007**, *129*, 5838-5839.

**(G) X-ray Crystal Data of Complex 1.**

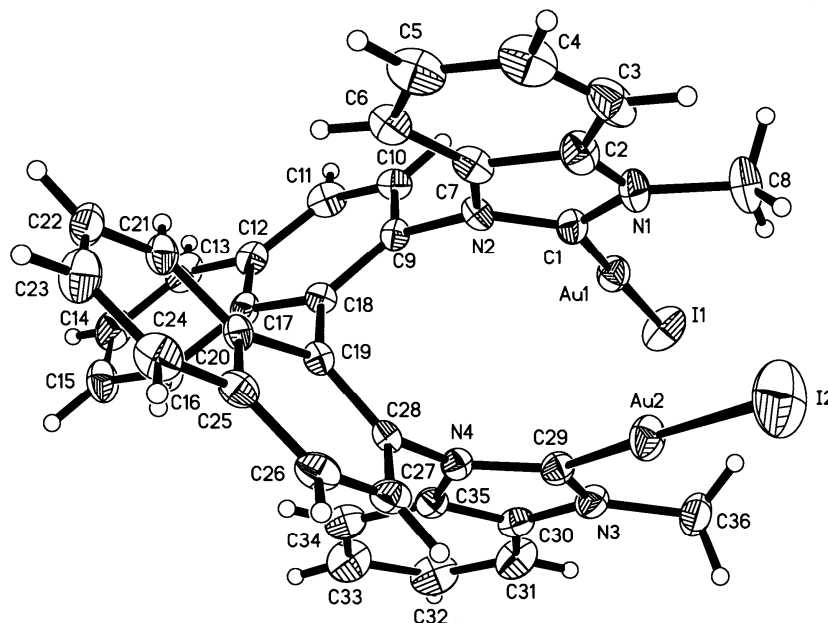

The crystal data of **1** have been deposited in CCDC with number 759948. Empirical Formula:  $C_{40}H_{32}Au_2I_2N_6$ ; Formula Weight: 1244.45; Crystal Color, Habit: colorless, prismatic; Crystal Dimensions: 0.301 x 0.217 x 0.24 mm; Crystal System: Triclinic; Lattice Type: Primitive; Lattice Parameters:  $a = 9.3794(9)\text{\AA}$ ,  $b = 10.4523(10)\text{\AA}$ ,  $c = 20.784(2)\text{\AA}$ ,  $\alpha = 85.843(2)^\circ$ ,  $\beta = 77.783(2)^\circ$ ,  $\gamma = 80.838(2)^\circ$ ,  $V = 1964.5(3)\text{\AA}^3$ ; Space group: P-1;  $Z = 2$ ;  $D_{calc} = 2.104\text{ g/cm}^3$ ;  $F_{000} = 1156$ ; Diffractometer: Bruker Smart CCD; Residuals:  $R$ ;  $R_w$ : 0.0448, 0.1129.

Table 1. Crystal data and structure refinement for cd29663.

|                                   |                                                                                                                                      |
|-----------------------------------|--------------------------------------------------------------------------------------------------------------------------------------|
| Identification code               | cd29663                                                                                                                              |
| Empirical formula                 | C40 H32 Au2 I2 N6                                                                                                                    |
| Formula weight                    | 1244.45                                                                                                                              |
| Temperature                       | 293(2) K                                                                                                                             |
| Wavelength                        | 0.71073 Å                                                                                                                            |
| Crystal system, space group       | Triclinic, P-1                                                                                                                       |
| Unit cell dimensions              | a = 9.3794(9) Å    alpha = 85.843(2) deg.<br>b = 10.4522(10) Å    beta = 77.783(2) deg.<br>c = 20.784(2) Å    gamma = 80.838(2) deg. |
| Volume                            | 1964.5(3) Å <sup>3</sup>                                                                                                             |
| Z, Calculated density             | 2, 2.104 Mg/m <sup>3</sup>                                                                                                           |
| Absorption coefficient            | 9.067 mm <sup>-1</sup>                                                                                                               |
| F(000)                            | 1156                                                                                                                                 |
| Crystal size                      | 0.301 x 0.217 x 0.24 mm                                                                                                              |
| Theta range for data collection   | 1.98 to 26.00 deg.                                                                                                                   |
| Limiting indices                  | -11<=h<=11, -12<=k<=7, -25<=l<=25                                                                                                    |
| Reflections collected / unique    | 10847 / 7587 [R(int) = 0.0389]                                                                                                       |
| Completeness to theta = 26.00     | 98.3 %                                                                                                                               |
| Absorption correction             | Empirical                                                                                                                            |
| Max. and min. transmission        | 1.00000 and 0.41456                                                                                                                  |
| Refinement method                 | Full-matrix least-squares on F <sup>2</sup>                                                                                          |
| Data / restraints / parameters    | 7587 / 0 / 455                                                                                                                       |
| Goodness-of-fit on F <sup>2</sup> | 1.005                                                                                                                                |
| Final R indices [I>2sigma(I)]     | R1 = 0.0448, wR2 = 0.1129                                                                                                            |
| R indices (all data)              | R1 = 0.0554, wR2 = 0.1176                                                                                                            |
| Largest diff. peak and hole       | 1.539 and -1.266 e.Å <sup>-3</sup>                                                                                                   |

Table 2. Atomic coordinates ( $\times 10^4$ ) and equivalent isotropic displacement parameters ( $\text{\AA}^2 \times 10^3$ ) for cd29663. U(eq) is defined as one third of the trace of the orthogonalized  $U_{ij}$  tensor.

|       | x         | y        | z        | U(eq)   |
|-------|-----------|----------|----------|---------|
| Au(1) | 6090(1)   | 5025(1)  | 2242(1)  | 42(1)   |
| Au(2) | 6215(1)   | 1120(1)  | 1516(1)  | 46(1)   |
| I(1)  | 3959(1)   | 6879(1)  | 2351(1)  | 66(1)   |
| I(2)  | 7666(1)   | 191(1)   | 447(1)   | 100(1)  |
| N(1)  | 8621(8)   | 3171(6)  | 1555(3)  | 44(2)   |
| N(2)  | 8330(6)   | 2836(5)  | 2601(3)  | 32(1)   |
| N(3)  | 3811(7)   | 2779(6)  | 2387(3)  | 39(1)   |
| N(4)  | 5174(6)   | 1529(5)  | 2967(3)  | 31(1)   |
| N(5)  | 7530(30)  | 5780(30) | -286(11) | 246(15) |
| N(6)  | -16(11)   | 5623(10) | 2066(5)  | 84(3)   |
| C(1)  | 7768(8)   | 3555(7)  | 2128(4)  | 37(2)   |
| C(2)  | 9713(9)   | 2202(8)  | 1651(4)  | 45(2)   |
| C(3)  | 10861(11) | 1489(9)  | 1216(5)  | 60(2)   |
| C(4)  | 11853(11) | 642(9)   | 1482(5)  | 61(3)   |
| C(5)  | 11750(10) | 458(8)   | 2152(5)  | 59(2)   |
| C(6)  | 10607(8)  | 1143(7)  | 2595(4)  | 43(2)   |
| C(7)  | 9586(8)   | 1977(7)  | 2330(4)  | 37(2)   |
| C(8)  | 8451(12)  | 3747(10) | 913(4)   | 67(3)   |
| C(9)  | 7792(7)   | 3025(6)  | 3286(3)  | 28(1)   |
| C(10) | 7819(8)   | 4291(6)  | 3501(4)  | 35(2)   |
| C(11) | 7321(8)   | 4579(7)  | 4135(4)  | 42(2)   |
| C(12) | 6831(8)   | 3625(7)  | 4609(4)  | 36(2)   |
| C(13) | 6313(9)   | 3892(9)  | 5283(4)  | 49(2)   |
| C(14) | 5819(10)  | 2983(9)  | 5733(4)  | 55(2)   |
| C(15) | 5813(9)   | 1714(8)  | 5525(4)  | 50(2)   |
| C(16) | 6298(8)   | 1428(8)  | 4886(4)  | 41(2)   |
| C(17) | 6798(7)   | 2366(7)  | 4414(3)  | 33(2)   |
| C(18) | 7288(7)   | 2076(6)  | 3721(3)  | 29(1)   |
| C(19) | 7240(7)   | 762(6)   | 3498(3)  | 28(1)   |
| C(20) | 8296(7)   | -319(6)  | 3677(3)  | 29(1)   |
| C(21) | 9307(8)   | -186(7)  | 4068(3)  | 38(2)   |
| C(22) | 10323(9)  | -1185(8) | 4184(4)  | 45(2)   |
| C(23) | 10398(10) | -2413(8) | 3922(4)  | 52(2)   |
| C(24) | 9449(9)   | -2563(7) | 3540(4)  | 47(2)   |
| C(25) | 8354(8)   | -1564(7) | 3410(4)  | 37(2)   |
| C(26) | 7368(8)   | -1708(7) | 3022(4)  | 39(2)   |
| C(27) | 6300(8)   | -693(7)  | 2890(4)  | 38(2)   |
| C(28) | 6269(7)   | 532(6)   | 3128(3)  | 29(1)   |
| C(29) | 5008(8)   | 1880(7)  | 2350(4)  | 35(2)   |
| C(30) | 3141(8)   | 2977(7)  | 3037(4)  | 38(2)   |
| C(31) | 1837(9)   | 3759(8)  | 3321(5)  | 54(2)   |
| C(32) | 1427(9)   | 3657(9)  | 3987(5)  | 60(2)   |
| C(33) | 2225(10)  | 2788(9)  | 4386(5)  | 60(2)   |
| C(34) | 3544(8)   | 2052(8)  | 4086(4)  | 45(2)   |
| C(35) | 3965(8)   | 2174(6)  | 3415(3)  | 33(2)   |
| C(36) | 3244(10)  | 3464(9)  | 1817(4)  | 54(2)   |
| C(37) | 6580(30)  | 6290(30) | -44(12)  | 174(10) |
| C(38) | 5250(30)  | 7041(18) | 322(10)  | 180(9)  |
| C(39) | 166(13)   | 6408(11) | 1709(6)  | 75(3)   |
| C(40) | 510(30)   | 7412(17) | 1217(10) | 194(10) |

Table 3. Bond lengths [Å] and angles [deg] for cd29663.

---

|             |           |
|-------------|-----------|
| Au(1)-C(1)  | 2.005(7)  |
| Au(1)-I(1)  | 2.5376(7) |
| Au(2)-C(29) | 2.000(7)  |
| Au(2)-I(2)  | 2.5189(8) |
| N(1)-C(1)   | 1.335(10) |
| N(1)-C(2)   | 1.357(10) |
| N(1)-C(8)   | 1.453(10) |
| N(2)-C(1)   | 1.340(9)  |
| N(2)-C(7)   | 1.404(9)  |
| N(2)-C(9)   | 1.422(8)  |
| N(3)-C(29)  | 1.336(9)  |
| N(3)-C(30)  | 1.380(10) |
| N(3)-C(36)  | 1.491(10) |
| N(4)-C(29)  | 1.342(9)  |
| N(4)-C(35)  | 1.416(9)  |
| N(4)-C(28)  | 1.417(8)  |
| N(5)-C(37)  | 1.01(3)   |
| N(6)-C(39)  | 1.074(12) |
| C(2)-C(7)   | 1.395(11) |
| C(2)-C(3)   | 1.401(12) |
| C(3)-C(4)   | 1.356(14) |
| C(3)-H(3)   | 0.9300    |
| C(4)-C(5)   | 1.376(13) |
| C(4)-H(4)   | 0.9300    |
| C(5)-C(6)   | 1.395(11) |
| C(5)-H(5)   | 0.9300    |
| C(6)-C(7)   | 1.367(11) |
| C(6)-H(6)   | 0.9300    |
| C(8)-H(8A)  | 0.9600    |
| C(8)-H(8B)  | 0.9600    |
| C(8)-H(8C)  | 0.9600    |
| C(9)-C(18)  | 1.365(9)  |
| C(9)-C(10)  | 1.434(9)  |
| C(10)-C(11) | 1.340(10) |
| C(10)-H(10) | 0.9300    |
| C(11)-C(12) | 1.409(11) |
| C(11)-H(11) | 0.9300    |
| C(12)-C(17) | 1.412(10) |
| C(12)-C(13) | 1.415(10) |
| C(13)-C(14) | 1.349(12) |
| C(13)-H(13) | 0.9300    |
| C(14)-C(15) | 1.425(12) |
| C(14)-H(14) | 0.9300    |
| C(15)-C(16) | 1.348(11) |
| C(15)-H(15) | 0.9300    |
| C(16)-C(17) | 1.399(10) |
| C(16)-H(16) | 0.9300    |
| C(17)-C(18) | 1.453(9)  |
| C(18)-C(19) | 1.491(9)  |
| C(19)-C(28) | 1.369(9)  |
| C(19)-C(20) | 1.461(9)  |
| C(20)-C(21) | 1.400(10) |
| C(20)-C(25) | 1.440(10) |
| C(21)-C(22) | 1.342(10) |
| C(21)-H(21) | 0.9300    |
| C(22)-C(23) | 1.416(11) |
| C(22)-H(22) | 0.9300    |
| C(23)-C(24) | 1.344(12) |
| C(23)-H(23) | 0.9300    |
| C(24)-C(25) | 1.397(10) |
| C(24)-H(24) | 0.9300    |
| C(25)-C(26) | 1.381(10) |
| C(26)-C(27) | 1.393(10) |
| C(26)-H(26) | 0.9300    |
| C(27)-C(28) | 1.400(9)  |
| C(27)-H(27) | 0.9300    |
| C(30)-C(35) | 1.368(10) |
| C(30)-C(31) | 1.399(11) |

---

|                   |           |
|-------------------|-----------|
| C(31)-C(32)       | 1.357(13) |
| C(31)-H(31)       | 0.9300    |
| C(32)-C(33)       | 1.418(13) |
| C(32)-H(32)       | 0.9300    |
| C(33)-C(34)       | 1.397(11) |
| C(33)-H(33)       | 0.9300    |
| C(34)-C(35)       | 1.369(11) |
| C(34)-H(34)       | 0.9300    |
| C(36)-H(36A)      | 0.9600    |
| C(36)-H(36B)      | 0.9600    |
| C(36)-H(36C)      | 0.9600    |
| C(37)-C(38)       | 1.46(2)   |
| C(38)-H(38A)      | 0.9600    |
| C(38)-H(38B)      | 0.9600    |
| C(38)-H(38C)      | 0.9600    |
| C(39)-C(40)       | 1.436(18) |
| C(40)-H(40A)      | 0.9600    |
| C(40)-H(40B)      | 0.9600    |
| C(40)-H(40C)      | 0.9600    |
|                   |           |
| C(1)-Au(1)-I(1)   | 178.3(2)  |
| C(29)-Au(2)-I(2)  | 178.1(2)  |
| C(1)-N(1)-C(2)    | 111.0(6)  |
| C(1)-N(1)-C(8)    | 124.8(7)  |
| C(2)-N(1)-C(8)    | 124.1(7)  |
| C(1)-N(2)-C(7)    | 111.0(6)  |
| C(1)-N(2)-C(9)    | 123.5(6)  |
| C(7)-N(2)-C(9)    | 125.2(6)  |
| C(29)-N(3)-C(30)  | 110.2(6)  |
| C(29)-N(3)-C(36)  | 125.9(7)  |
| C(30)-N(3)-C(36)  | 124.0(6)  |
| C(29)-N(4)-C(35)  | 108.8(6)  |
| C(29)-N(4)-C(28)  | 124.2(6)  |
| C(35)-N(4)-C(28)  | 126.4(6)  |
| N(1)-C(1)-N(2)    | 106.5(6)  |
| N(1)-C(1)-Au(1)   | 125.7(5)  |
| N(2)-C(1)-Au(1)   | 127.6(6)  |
| N(1)-C(2)-C(7)    | 107.6(7)  |
| N(1)-C(2)-C(3)    | 132.6(8)  |
| C(7)-C(2)-C(3)    | 119.7(8)  |
| C(4)-C(3)-C(2)    | 117.5(8)  |
| C(4)-C(3)-H(3)    | 121.3     |
| C(2)-C(3)-H(3)    | 121.3     |
| C(3)-C(4)-C(5)    | 122.4(8)  |
| C(3)-C(4)-H(4)    | 118.8     |
| C(5)-C(4)-H(4)    | 118.8     |
| C(4)-C(5)-C(6)    | 121.3(9)  |
| C(4)-C(5)-H(5)    | 119.4     |
| C(6)-C(5)-H(5)    | 119.4     |
| C(7)-C(6)-C(5)    | 116.5(8)  |
| C(7)-C(6)-H(6)    | 121.7     |
| C(5)-C(6)-H(6)    | 121.7     |
| C(6)-C(7)-C(2)    | 122.5(7)  |
| C(6)-C(7)-N(2)    | 133.5(7)  |
| C(2)-C(7)-N(2)    | 103.8(7)  |
| N(1)-C(8)-H(8A)   | 109.5     |
| N(1)-C(8)-H(8B)   | 109.5     |
| H(8A)-C(8)-H(8B)  | 109.5     |
| N(1)-C(8)-H(8C)   | 109.5     |
| H(8A)-C(8)-H(8C)  | 109.5     |
| H(8B)-C(8)-H(8C)  | 109.5     |
| C(18)-C(9)-N(2)   | 123.3(6)  |
| C(18)-C(9)-C(10)  | 121.0(6)  |
| N(2)-C(9)-C(10)   | 115.7(6)  |
| C(11)-C(10)-C(9)  | 120.6(7)  |
| C(11)-C(10)-H(10) | 119.7     |
| C(9)-C(10)-H(10)  | 119.7     |
| C(10)-C(11)-C(12) | 120.7(7)  |
| C(10)-C(11)-H(11) | 119.6     |
| C(12)-C(11)-H(11) | 119.6     |
| C(11)-C(12)-C(17) | 120.0(7)  |
| C(11)-C(12)-C(13) | 122.2(7)  |

---

|                   |          |
|-------------------|----------|
| C(17)-C(12)-C(13) | 117.7(7) |
| C(14)-C(13)-C(12) | 122.0(8) |
| C(14)-C(13)-H(13) | 119.0    |
| C(12)-C(13)-H(13) | 119.0    |
| C(13)-C(14)-C(15) | 119.2(8) |
| C(13)-C(14)-H(14) | 120.4    |
| C(15)-C(14)-H(14) | 120.4    |
| C(16)-C(15)-C(14) | 120.3(8) |
| C(16)-C(15)-H(15) | 119.9    |
| C(14)-C(15)-H(15) | 119.9    |
| C(15)-C(16)-C(17) | 121.1(8) |
| C(15)-C(16)-H(16) | 119.4    |
| C(17)-C(16)-H(16) | 119.4    |
| C(16)-C(17)-C(12) | 119.7(7) |
| C(16)-C(17)-C(18) | 121.5(6) |
| C(12)-C(17)-C(18) | 118.8(6) |
| C(9)-C(18)-C(17)  | 118.7(6) |
| C(9)-C(18)-C(19)  | 121.2(6) |
| C(17)-C(18)-C(19) | 120.0(6) |
| C(28)-C(19)-C(20) | 118.9(6) |
| C(28)-C(19)-C(18) | 122.9(6) |
| C(20)-C(19)-C(18) | 118.2(6) |
| C(21)-C(20)-C(25) | 118.4(6) |
| C(21)-C(20)-C(19) | 123.1(6) |
| C(25)-C(20)-C(19) | 118.4(6) |
| C(22)-C(21)-C(20) | 121.1(7) |
| C(22)-C(21)-H(21) | 119.4    |
| C(20)-C(21)-H(21) | 119.4    |
| C(21)-C(22)-C(23) | 121.1(7) |
| C(21)-C(22)-H(22) | 119.5    |
| C(23)-C(22)-H(22) | 119.5    |
| C(24)-C(23)-C(22) | 119.0(7) |
| C(24)-C(23)-H(23) | 120.5    |
| C(22)-C(23)-H(23) | 120.5    |
| C(23)-C(24)-C(25) | 122.5(7) |
| C(23)-C(24)-H(24) | 118.8    |
| C(25)-C(24)-H(24) | 118.8    |
| C(26)-C(25)-C(24) | 123.0(7) |
| C(26)-C(25)-C(20) | 119.0(6) |
| C(24)-C(25)-C(20) | 117.9(7) |
| C(25)-C(26)-C(27) | 122.1(7) |
| C(25)-C(26)-H(26) | 119.0    |
| C(27)-C(26)-H(26) | 119.0    |
| C(26)-C(27)-C(28) | 119.2(7) |
| C(26)-C(27)-H(27) | 120.4    |
| C(28)-C(27)-H(27) | 120.4    |
| C(19)-C(28)-C(27) | 122.1(6) |
| C(19)-C(28)-N(4)  | 121.4(6) |
| C(27)-C(28)-N(4)  | 116.5(6) |
| N(3)-C(29)-N(4)   | 107.8(6) |
| N(3)-C(29)-Au(2)  | 124.9(5) |
| N(4)-C(29)-Au(2)  | 127.1(5) |
| C(35)-C(30)-N(3)  | 107.1(6) |
| C(35)-C(30)-C(31) | 121.5(8) |
| N(3)-C(30)-C(31)  | 131.3(7) |
| C(32)-C(31)-C(30) | 116.3(8) |
| C(32)-C(31)-H(31) | 121.9    |
| C(30)-C(31)-H(31) | 121.9    |
| C(31)-C(32)-C(33) | 123.3(8) |
| C(31)-C(32)-H(32) | 118.4    |
| C(33)-C(32)-H(32) | 118.4    |
| C(34)-C(33)-C(32) | 118.6(9) |
| C(34)-C(33)-H(33) | 120.7    |
| C(32)-C(33)-H(33) | 120.7    |
| C(35)-C(34)-C(33) | 117.8(8) |
| C(35)-C(34)-H(34) | 121.1    |
| C(33)-C(34)-H(34) | 121.1    |
| C(30)-C(35)-C(34) | 122.4(7) |
| C(30)-C(35)-N(4)  | 105.9(6) |
| C(34)-C(35)-N(4)  | 131.6(7) |
| N(3)-C(36)-H(36A) | 109.5    |
| N(3)-C(36)-H(36B) | 109.5    |

---

|                     |           |
|---------------------|-----------|
| H(36A)-C(36)-H(36B) | 109.5     |
| N(3)-C(36)-H(36C)   | 109.5     |
| H(36A)-C(36)-H(36C) | 109.5     |
| H(36B)-C(36)-H(36C) | 109.5     |
| N(5)-C(37)-C(38)    | 178(4)    |
| C(37)-C(38)-H(38A)  | 109.5     |
| C(37)-C(38)-H(38B)  | 109.5     |
| H(38A)-C(38)-H(38B) | 109.5     |
| C(37)-C(38)-H(38C)  | 109.4     |
| H(38A)-C(38)-H(38C) | 109.5     |
| H(38B)-C(38)-H(38C) | 109.5     |
| N(6)-C(39)-C(40)    | 176.2(16) |
| C(39)-C(40)-H(40A)  | 109.5     |
| C(39)-C(40)-H(40B)  | 109.5     |
| H(40A)-C(40)-H(40B) | 109.5     |
| C(39)-C(40)-H(40C)  | 109.5     |
| H(40A)-C(40)-H(40C) | 109.5     |
| H(40B)-C(40)-H(40C) | 109.5     |

---

Symmetry transformations used to generate equivalent atoms:

Table 4. Anisotropic displacement parameters ( $\text{\AA}^2 \times 10^3$ ) for cd29663.  
The anisotropic displacement factor exponent takes the form:  
 $-2 \pi^2 [h^2 a^{*2} U_{11} + \dots + 2 h k a^* b^* U_{12}]$

|       | U11     | U22     | U33     | U23     | U13     | U12     |
|-------|---------|---------|---------|---------|---------|---------|
| Au(1) | 46(1)   | 38(1)   | 43(1)   | 3(1)    | -14(1)  | -3(1)   |
| Au(2) | 50(1)   | 57(1)   | 30(1)   | -9(1)   | -6(1)   | -2(1)   |
| I(1)  | 69(1)   | 49(1)   | 84(1)   | -16(1)  | -35(1)  | 10(1)   |
| I(2)  | 116(1)  | 120(1)  | 50(1)   | -34(1)  | 3(1)    | 12(1)   |
| N(1)  | 56(4)   | 50(4)   | 25(3)   | 0(3)    | -6(3)   | -7(3)   |
| N(2)  | 34(3)   | 29(3)   | 29(3)   | 0(2)    | 0(2)    | -4(2)   |
| N(3)  | 36(3)   | 41(3)   | 42(4)   | 1(3)    | -14(3)  | -5(3)   |
| N(4)  | 31(3)   | 32(3)   | 29(3)   | -5(2)   | -5(2)   | -4(2)   |
| N(5)  | 180(20) | 350(30) | 126(17) | 89(19)  | -6(14)  | 110(20) |
| N(6)  | 82(7)   | 76(6)   | 92(8)   | 8(6)    | -11(6)  | -18(5)  |
| C(1)  | 40(4)   | 36(4)   | 35(4)   | 5(3)    | -12(3)  | -7(3)   |
| C(2)  | 57(5)   | 42(4)   | 35(4)   | -8(3)   | -4(4)   | -8(4)   |
| C(3)  | 73(6)   | 65(6)   | 37(5)   | -14(4)  | 15(4)   | -22(5)  |
| C(4)  | 57(6)   | 53(5)   | 62(6)   | -25(5)  | 12(5)   | 0(5)    |
| C(5)  | 48(5)   | 44(5)   | 74(7)   | -12(4)  | 7(5)    | 0(4)    |
| C(6)  | 43(4)   | 34(4)   | 48(5)   | -2(3)   | -2(4)   | 0(3)    |
| C(7)  | 39(4)   | 29(4)   | 37(4)   | -10(3)  | 6(3)    | -3(3)   |
| C(8)  | 90(7)   | 77(7)   | 31(5)   | 8(4)    | -8(5)   | -9(6)   |
| C(9)  | 26(3)   | 28(3)   | 26(3)   | -4(3)   | -5(3)   | 4(3)    |
| C(10) | 33(4)   | 30(4)   | 42(4)   | -4(3)   | -6(3)   | -4(3)   |
| C(11) | 39(4)   | 31(4)   | 55(5)   | -14(3)  | -9(4)   | 3(3)    |
| C(12) | 30(4)   | 40(4)   | 34(4)   | -9(3)   | -5(3)   | 7(3)    |
| C(13) | 48(5)   | 60(5)   | 37(5)   | -23(4)  | -10(4)  | 5(4)    |
| C(14) | 53(5)   | 77(6)   | 33(5)   | -15(4)  | -6(4)   | -1(5)   |
| C(15) | 52(5)   | 60(5)   | 30(4)   | 3(4)    | -1(4)   | 3(4)    |
| C(16) | 42(4)   | 42(4)   | 34(4)   | -3(3)   | -3(3)   | 2(3)    |
| C(17) | 31(3)   | 40(4)   | 24(4)   | -5(3)   | -5(3)   | 4(3)    |
| C(18) | 29(3)   | 28(3)   | 28(4)   | -5(3)   | -3(3)   | -3(3)   |
| C(19) | 30(3)   | 25(3)   | 25(3)   | -2(3)   | -1(3)   | 1(3)    |
| C(20) | 34(3)   | 31(3)   | 21(3)   | -1(3)   | -2(3)   | -2(3)   |
| C(21) | 43(4)   | 41(4)   | 26(4)   | -1(3)   | -5(3)   | -1(3)   |
| C(22) | 43(4)   | 54(5)   | 38(4)   | 5(4)    | -14(4)  | -1(4)   |
| C(23) | 56(5)   | 39(4)   | 56(5)   | -3(4)   | -15(4)  | 15(4)   |
| C(24) | 50(5)   | 24(4)   | 60(5)   | -6(3)   | -4(4)   | 4(3)    |
| C(25) | 36(4)   | 34(4)   | 37(4)   | -2(3)   | 1(3)    | -4(3)   |
| C(26) | 45(4)   | 26(4)   | 45(5)   | -9(3)   | 0(4)    | -10(3)  |
| C(27) | 43(4)   | 37(4)   | 35(4)   | -11(3)  | -1(3)   | -15(3)  |
| C(28) | 31(3)   | 29(3)   | 24(3)   | 3(3)    | -1(3)   | -7(3)   |
| C(29) | 42(4)   | 33(4)   | 33(4)   | -5(3)   | -11(3)  | -9(3)   |
| C(30) | 32(4)   | 37(4)   | 49(5)   | -3(3)   | -12(3)  | -6(3)   |
| C(31) | 43(5)   | 53(5)   | 64(6)   | -18(4)  | -16(4)  | 11(4)   |
| C(32) | 34(4)   | 61(6)   | 78(7)   | -25(5)  | -3(4)   | 12(4)   |
| C(33) | 47(5)   | 74(6)   | 54(6)   | -22(5)  | 1(4)    | 2(5)    |
| C(34) | 33(4)   | 45(4)   | 55(5)   | -11(4)  | -6(4)   | 1(3)    |
| C(35) | 39(4)   | 29(3)   | 32(4)   | -8(3)   | -7(3)   | -9(3)   |
| C(36) | 59(5)   | 67(6)   | 40(5)   | 3(4)    | -22(4)  | -6(5)   |
| C(37) | 190(30) | 190(20) | 107(18) | 52(16)  | -24(17) | 52(19)  |
| C(38) | 240(30) | 160(20) | 140(20) | -13(16) | -70(20) | 4(19)   |
| C(39) | 79(8)   | 65(7)   | 77(8)   | -1(6)   | -17(6)  | -1(6)   |
| C(40) | 250(30) | 141(16) | 210(20) | 97(16)  | -90(20) | -75(17) |

Table 5. Hydrogen coordinates ( $\times 10^4$ ) and isotropic displacement parameters ( $\text{\AA}^2 \times 10^3$ ) for cd29663.

|        | x     | y     | z    | U(eq) |
|--------|-------|-------|------|-------|
| H(3)   | 10940 | 1593  | 763  | 73    |
| H(4)   | 12632 | 169   | 1201 | 73    |
| H(5)   | 12457 | -134  | 2311 | 70    |
| H(6)   | 10542 | 1037  | 3048 | 52    |
| H(8A)  | 7488  | 4248  | 949  | 101   |
| H(8B)  | 8564  | 3073  | 608  | 101   |
| H(8C)  | 9187  | 4300  | 758  | 101   |
| H(10)  | 8186  | 4919  | 3199 | 42    |
| H(11)  | 7299  | 5417  | 4264 | 51    |
| H(13)  | 6313  | 4720  | 5420 | 58    |
| H(14)  | 5487  | 3181  | 6173 | 66    |
| H(15)  | 5473  | 1081  | 5831 | 60    |
| H(16)  | 6301  | 594   | 4758 | 49    |
| H(21)  | 9274  | 608   | 4249 | 45    |
| H(22)  | 10990 | -1069 | 4441 | 54    |
| H(23)  | 11092 | -3105 | 4012 | 63    |
| H(24)  | 9524  | -3362 | 3356 | 56    |
| H(26)  | 7419  | -2508 | 2842 | 47    |
| H(27)  | 5615  | -827  | 2646 | 45    |
| H(31)  | 1281  | 4317  | 3067 | 65    |
| H(32)  | 581   | 4183  | 4191 | 72    |
| H(33)  | 1877  | 2709  | 4838 | 72    |
| H(34)  | 4118  | 1498  | 4333 | 54    |
| H(36A) | 4059  | 3626  | 1471 | 82    |
| H(36B) | 2652  | 4272  | 1953 | 82    |
| H(36C) | 2655  | 2933  | 1658 | 82    |
| H(38A) | 4944  | 7783  | 56   | 269   |
| H(38B) | 5448  | 7324  | 719  | 269   |
| H(38C) | 4478  | 6511  | 432  | 269   |
| H(40A) | 1555  | 7338  | 1068 | 291   |
| H(40B) | 134   | 8244  | 1403 | 291   |
| H(40C) | 54    | 7324  | 852  | 291   |

Table 6. Torsion angles [deg] for cd29663.

|                         |           |
|-------------------------|-----------|
| C(2)-N(1)-C(1)-N(2)     | 0.9(8)    |
| C(8)-N(1)-C(1)-N(2)     | -176.6(8) |
| C(2)-N(1)-C(1)-Au(1)    | 176.2(5)  |
| C(8)-N(1)-C(1)-Au(1)    | -1.3(11)  |
| C(7)-N(2)-C(1)-N(1)     | 0.7(8)    |
| C(9)-N(2)-C(1)-N(1)     | 175.0(6)  |
| C(7)-N(2)-C(1)-Au(1)    | -174.5(5) |
| C(9)-N(2)-C(1)-Au(1)    | -0.2(10)  |
| I(1)-Au(1)-C(1)-N(1)    | 24(8)     |
| I(1)-Au(1)-C(1)-N(2)    | -162(7)   |
| C(1)-N(1)-C(2)-C(7)     | -2.1(9)   |
| C(8)-N(1)-C(2)-C(7)     | 175.5(8)  |
| C(1)-N(1)-C(2)-C(3)     | 179.8(9)  |
| C(8)-N(1)-C(2)-C(3)     | -2.6(15)  |
| N(1)-C(2)-C(3)-C(4)     | 174.7(9)  |
| C(7)-C(2)-C(3)-C(4)     | -3.2(13)  |
| C(2)-C(3)-C(4)-C(5)     | 0.9(14)   |
| C(3)-C(4)-C(5)-C(6)     | 0.0(15)   |
| C(4)-C(5)-C(6)-C(7)     | 1.4(13)   |
| C(5)-C(6)-C(7)-C(2)     | -3.8(12)  |
| C(5)-C(6)-C(7)-N(2)     | -178.3(7) |
| N(1)-C(2)-C(7)-C(6)     | -173.6(7) |
| C(3)-C(2)-C(7)-C(6)     | 4.8(12)   |
| N(1)-C(2)-C(7)-N(2)     | 2.3(8)    |
| C(3)-C(2)-C(7)-N(2)     | -179.3(7) |
| C(1)-N(2)-C(7)-C(6)     | 173.3(8)  |
| C(9)-N(2)-C(7)-C(6)     | -0.9(13)  |
| C(1)-N(2)-C(7)-C(2)     | -1.9(8)   |
| C(9)-N(2)-C(7)-C(2)     | -176.1(6) |
| C(1)-N(2)-C(9)-C(18)    | 122.6(7)  |
| C(7)-N(2)-C(9)-C(18)    | -63.9(9)  |
| C(1)-N(2)-C(9)-C(10)    | -57.9(9)  |
| C(7)-N(2)-C(9)-C(10)    | 115.6(7)  |
| C(18)-C(9)-C(10)-C(11)  | -1.3(10)  |
| N(2)-C(9)-C(10)-C(11)   | 179.2(6)  |
| C(9)-C(10)-C(11)-C(12)  | 3.3(11)   |
| C(10)-C(11)-C(12)-C(17) | -2.9(10)  |
| C(10)-C(11)-C(12)-C(13) | 179.3(7)  |
| C(11)-C(12)-C(13)-C(14) | 178.8(7)  |
| C(17)-C(12)-C(13)-C(14) | 0.9(11)   |
| C(12)-C(13)-C(14)-C(15) | -0.2(12)  |
| C(13)-C(14)-C(15)-C(16) | 0.1(13)   |
| C(14)-C(15)-C(16)-C(17) | -0.8(12)  |
| C(15)-C(16)-C(17)-C(12) | 1.6(11)   |
| C(15)-C(16)-C(17)-C(18) | -178.4(7) |
| C(11)-C(12)-C(17)-C(16) | -179.5(6) |
| C(13)-C(12)-C(17)-C(16) | -1.6(10)  |
| C(11)-C(12)-C(17)-C(18) | 0.5(10)   |
| C(13)-C(12)-C(17)-C(18) | 178.4(6)  |
| N(2)-C(9)-C(18)-C(17)   | 178.5(6)  |
| C(10)-C(9)-C(18)-C(17)  | -1.0(9)   |
| N(2)-C(9)-C(18)-C(19)   | -1.3(10)  |
| C(10)-C(9)-C(18)-C(19)  | 179.3(6)  |
| C(16)-C(17)-C(18)-C(9)  | -178.6(6) |
| C(12)-C(17)-C(18)-C(9)  | 1.3(9)    |
| C(16)-C(17)-C(18)-C(19) | 1.1(10)   |
| C(12)-C(17)-C(18)-C(19) | -178.9(6) |
| C(9)-C(18)-C(19)-C(28)  | -70.4(9)  |
| C(17)-C(18)-C(19)-C(28) | 109.8(8)  |
| C(9)-C(18)-C(19)-C(20)  | 108.7(7)  |
| C(17)-C(18)-C(19)-C(20) | -71.1(8)  |
| C(28)-C(19)-C(20)-C(21) | -178.4(6) |
| C(18)-C(19)-C(20)-C(21) | 2.5(10)   |
| C(28)-C(19)-C(20)-C(25) | 5.1(9)    |
| C(18)-C(19)-C(20)-C(25) | -174.0(6) |
| C(25)-C(20)-C(21)-C(22) | 1.0(11)   |
| C(19)-C(20)-C(21)-C(22) | -175.5(7) |
| C(20)-C(21)-C(22)-C(23) | -0.7(12)  |

---

|                         |           |
|-------------------------|-----------|
| C(21)-C(22)-C(23)-C(24) | 1.3(13)   |
| C(22)-C(23)-C(24)-C(25) | -2.3(13)  |
| C(23)-C(24)-C(25)-C(26) | -179.7(8) |
| C(23)-C(24)-C(25)-C(20) | 2.6(12)   |
| C(21)-C(20)-C(25)-C(26) | -179.7(7) |
| C(19)-C(20)-C(25)-C(26) | -3.0(10)  |
| C(21)-C(20)-C(25)-C(24) | -1.9(10)  |
| C(19)-C(20)-C(25)-C(24) | 174.8(6)  |
| C(24)-C(25)-C(26)-C(27) | -179.0(7) |
| C(20)-C(25)-C(26)-C(27) | -1.2(11)  |
| C(25)-C(26)-C(27)-C(28) | 3.5(11)   |
| C(20)-C(19)-C(28)-C(27) | -3.0(10)  |
| C(18)-C(19)-C(28)-C(27) | 176.0(6)  |
| C(20)-C(19)-C(28)-N(4)  | 176.9(6)  |
| C(18)-C(19)-C(28)-N(4)  | -4.1(10)  |
| C(26)-C(27)-C(28)-C(19) | -1.2(10)  |
| C(26)-C(27)-C(28)-N(4)  | 178.9(6)  |
| C(29)-N(4)-C(28)-C(19)  | 124.2(7)  |
| C(35)-N(4)-C(28)-C(19)  | -65.8(9)  |
| C(29)-N(4)-C(28)-C(27)  | -55.9(9)  |
| C(35)-N(4)-C(28)-C(27)  | 114.1(7)  |
| C(30)-N(3)-C(29)-N(4)   | -2.9(8)   |
| C(36)-N(3)-C(29)-N(4)   | 178.2(7)  |
| C(30)-N(3)-C(29)-Au(2)  | 172.8(5)  |
| C(36)-N(3)-C(29)-Au(2)  | -6.1(10)  |
| C(35)-N(4)-C(29)-N(3)   | 4.2(8)    |
| C(28)-N(4)-C(29)-N(3)   | 175.7(6)  |
| C(35)-N(4)-C(29)-Au(2)  | -171.4(5) |
| C(28)-N(4)-C(29)-Au(2)  | 0.1(10)   |
| I(2)-Au(2)-C(29)-N(3)   | -16(7)    |
| I(2)-Au(2)-C(29)-N(4)   | 159(6)    |
| C(29)-N(3)-C(30)-C(35)  | 0.4(8)    |
| C(36)-N(3)-C(30)-C(35)  | 179.4(7)  |
| C(29)-N(3)-C(30)-C(31)  | -176.3(8) |
| C(36)-N(3)-C(30)-C(31)  | 2.6(13)   |
| C(35)-C(30)-C(31)-C(32) | -1.1(12)  |
| N(3)-C(30)-C(31)-C(32)  | 175.2(8)  |
| C(30)-C(31)-C(32)-C(33) | -1.9(14)  |
| C(31)-C(32)-C(33)-C(34) | 3.8(15)   |
| C(32)-C(33)-C(34)-C(35) | -2.6(13)  |
| N(3)-C(30)-C(35)-C(34)  | -174.9(7) |
| C(31)-C(30)-C(35)-C(34) | 2.3(12)   |
| N(3)-C(30)-C(35)-N(4)   | 2.1(8)    |
| C(31)-C(30)-C(35)-N(4)  | 179.2(7)  |
| C(33)-C(34)-C(35)-C(30) | -0.3(11)  |
| C(33)-C(34)-C(35)-N(4)  | -176.3(7) |
| C(29)-N(4)-C(35)-C(30)  | -3.9(8)   |
| C(28)-N(4)-C(35)-C(30)  | -175.1(6) |
| C(29)-N(4)-C(35)-C(34)  | 172.6(8)  |
| C(28)-N(4)-C(35)-C(34)  | 1.4(12)   |

---

Symmetry transformations used to generate equivalent atoms:

Table 7. Hydrogen bonds for cd29663 [Å and deg.].

| D-H...A               | d(D-H) | d(H...A) | d(D...A) | <(DHA) |
|-----------------------|--------|----------|----------|--------|
| C(38)-H(38A)...I(2)#1 | 0.96   | 3.27     | 4.13(2)  | 150.3  |
| C(3)-H(3)...I(2)#2    | 0.93   | 3.17     | 3.877(9) | 134.8  |
| C(14)-H(14)...I(1)#3  | 0.93   | 3.21     | 4.046(8) | 150.3  |
| C(5)-H(5)...I(1)#4    | 0.93   | 3.22     | 4.017(9) | 145.2  |

Symmetry transformations used to generate equivalent atoms:

#1 -x+1,-y+1,-z    #2 -x+2,-y,-z    #3 -x+1,-y+1,-z+1  
 #4 x+1,y-1,z

**(H) X-ray Crystal Data of Complex 2a.**

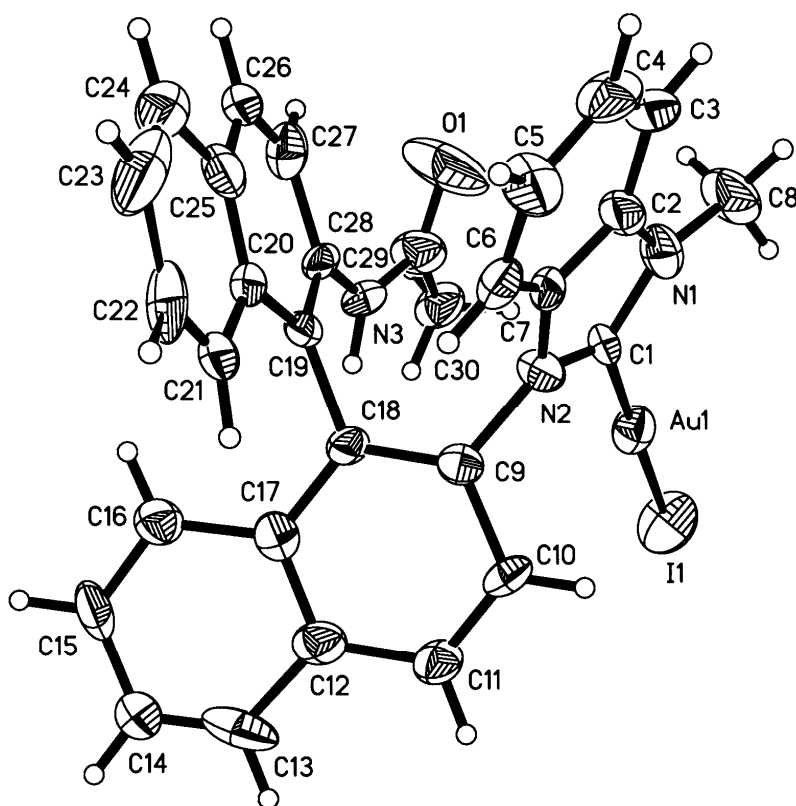

The crystal data of **2a** have been deposited in CCDC with number 757529. Empirical Formula:  $C_{32}H_{27}AuCl_4IN_3O$ ; Formula Weight: 935.23; Crystal Color, Habit: colorless, prismatic; Crystal Dimensions: 0.303 x 0.122 x 0.105 mm; Crystal System: Orthorhombic; Lattice Type: Primitive; Lattice Parameters:  $a = 7.6150(13)\text{\AA}$ ,  $b = 14.252(2)\text{\AA}$ ,  $c = 30.775(5)\text{\AA}$ ,  $\alpha = 90^\circ$ ,  $\beta = 90^\circ$ ,  $\gamma = 90^\circ$ ,  $V = 3340.1(10)\text{\AA}^3$ ; Space group:  $P2(1)2(1)2(1)$ ;  $Z = 4$ ;  $D_{calc} = 1.860\text{ g/cm}^3$ ;  $F_{000} = 1792$ ; Diffractometer: Bruker Smart CCD; Residuals:  $R$ ;  $R_w$ : 0.0635, 0.1464.

Table 1. Crystal data and structure refinement for cd29609.

|                                   |                                                                                                                |
|-----------------------------------|----------------------------------------------------------------------------------------------------------------|
| Identification code               | cd29609                                                                                                        |
| Empirical formula                 | C32 H27 Au Cl4 I N3 O                                                                                          |
| Formula weight                    | 935.23                                                                                                         |
| Temperature                       | 293(2) K                                                                                                       |
| Wavelength                        | 0.71073 Å                                                                                                      |
| Crystal system, space group       | Orthorhombic, P2(1)2(1)2(1)                                                                                    |
| Unit cell dimensions              | a = 7.6150(13) Å    alpha = 90 deg.<br>b = 14.252(2) Å    beta = 90 deg.<br>c = 30.775(5) Å    gamma = 90 deg. |
| Volume                            | 3340.1(10) Å <sup>3</sup>                                                                                      |
| Z, Calculated density             | 4, 1.860 Mg/m <sup>3</sup>                                                                                     |
| Absorption coefficient            | 5.679 mm <sup>-1</sup>                                                                                         |
| F(000)                            | 1792                                                                                                           |
| Crystal size                      | 0.303 x 0.122 x 0.105 mm                                                                                       |
| Theta range for data collection   | 1.57 to 25.50 deg.                                                                                             |
| Limiting indices                  | -9<=h<=9, -17<=k<=15, -33<=l<=37                                                                               |
| Reflections collected / unique    | 17758 / 6198 [R(int) = 0.0969]                                                                                 |
| Completeness to theta = 25.50     | 99.8 %                                                                                                         |
| Absorption correction             | Empirical                                                                                                      |
| Max. and min. transmission        | 1.00000 and 0.54235                                                                                            |
| Refinement method                 | Full-matrix least-squares on F <sup>2</sup>                                                                    |
| Data / restraints / parameters    | 6198 / 2 / 366                                                                                                 |
| Goodness-of-fit on F <sup>2</sup> | 0.919                                                                                                          |
| Final R indices [I>2sigma(I)]     | R1 = 0.0635, wR2 = 0.1464                                                                                      |
| R indices (all data)              | R1 = 0.1010, wR2 = 0.1600                                                                                      |
| Absolute structure parameter      | 0.044(13)                                                                                                      |
| Largest diff. peak and hole       | 1.144 and -1.043 e.Å <sup>-3</sup>                                                                             |

Table 2. Atomic coordinates ( $\times 10^4$ ) and equivalent isotropic displacement parameters ( $\text{\AA}^2 \times 10^3$ ) for cd29609. U(eq) is defined as one third of the trace of the orthogonalized  $U_{ij}$  tensor.

|       | x         | y        | z       | U(eq)   |
|-------|-----------|----------|---------|---------|
| Au(1) | 8761(1)   | 3685(1)  | 1624(1) | 60(1)   |
| I(1)  | 9053(2)   | 3333(1)  | 2416(1) | 103(1)  |
| N(1)  | 8800(20)  | 3291(8)  | 662(4)  | 59(3)   |
| N(2)  | 8330(17)  | 4748(8)  | 785(4)  | 50(3)   |
| N(3)  | 4233(15)  | 4369(9)  | 1192(4) | 55(3)   |
| O(1)  | 4000(40)  | 2899(9)  | 1045(5) | 160(9)  |
| Cl(1) | 6095(12)  | 5527(6)  | 2354(3) | 183(4)  |
| Cl(2) | 2439(11)  | 5613(6)  | 2160(3) | 151(3)  |
| Cl(3) | 2148(19)  | 5573(10) | 3379(4) | 255(6)  |
| Cl(4) | -1450(30) | 5521(12) | 3507(5) | 223(8)  |
| C(1)  | 8520(19)  | 3951(9)  | 976(5)  | 46(4)   |
| C(2)  | 8600(20)  | 3727(11) | 274(6)  | 64(4)   |
| C(3)  | 8730(20)  | 3391(12) | -171(6) | 76(5)   |
| C(4)  | 8700(30)  | 3988(14) | -486(5) | 77(5)   |
| C(5)  | 8560(30)  | 4954(13) | -410(5) | 77(5)   |
| C(6)  | 8386(18)  | 5297(12) | 1(5)    | 59(4)   |
| C(7)  | 8358(17)  | 4636(10) | 344(5)  | 51(4)   |
| C(8)  | 8920(30)  | 2277(10) | 760(6)  | 94(6)   |
| C(9)  | 7888(19)  | 5620(10) | 1026(4) | 45(3)   |
| C(10) | 9227(18)  | 5991(10) | 1313(4) | 49(4)   |
| C(11) | 8850(20)  | 6758(11) | 1547(4) | 60(4)   |
| C(12) | 7130(20)  | 7197(11) | 1515(5) | 63(5)   |
| C(13) | 6570(40)  | 7992(13) | 1780(5) | 94(8)   |
| C(14) | 5110(30)  | 8398(14) | 1755(6) | 80(6)   |
| C(15) | 3880(30)  | 8054(11) | 1463(5) | 81(5)   |
| C(16) | 4200(20)  | 7287(11) | 1219(5) | 62(4)   |
| C(17) | 5860(20)  | 6816(10) | 1249(5) | 52(4)   |
| C(18) | 6270(20)  | 6033(9)  | 987(4)  | 45(3)   |
| C(19) | 4931(19)  | 5613(9)  | 690(4)  | 41(3)   |
| C(20) | 4650(18)  | 6027(10) | 276(5)  | 47(4)   |
| C(21) | 5405(19)  | 6897(11) | 159(5)  | 61(5)   |
| C(22) | 5250(30)  | 7258(13) | -289(6) | 80(6)   |
| C(23) | 4220(30)  | 6750(20) | -598(7) | 130(11) |
| C(24) | 3400(30)  | 5990(13) | -485(6) | 68(5)   |
| C(25) | 3700(30)  | 5588(11) | -31(6)  | 70(5)   |
| C(26) | 2770(20)  | 4737(14) | 88(6)   | 74(6)   |
| C(27) | 2960(20)  | 4379(13) | 474(6)  | 67(5)   |
| C(28) | 4083(17)  | 4789(11) | 791(4)  | 45(4)   |
| C(29) | 4100(30)  | 3458(12) | 1329(6) | 75(5)   |
| C(30) | 4150(20)  | 3240(12) | 1775(5) | 78(6)   |
| C(31) | 4200(30)  | 6199(18) | 2357(7) | 123(9)  |
| C(32) | 130(30)   | 5810(30) | 3115(9) | 223(17) |

Table 3. Bond lengths [Å] and angles [deg] for cd29609.

---

|              |            |
|--------------|------------|
| Au(1)-C(1)   | 2.038(14)  |
| Au(1)-I(1)   | 2.5005(14) |
| N(1)-C(2)    | 1.354(19)  |
| N(1)-C(1)    | 1.365(17)  |
| N(1)-C(8)    | 1.481(18)  |
| N(2)-C(1)    | 1.286(16)  |
| N(2)-C(7)    | 1.369(19)  |
| N(2)-C(9)    | 1.487(18)  |
| N(3)-C(29)   | 1.369(19)  |
| N(3)-C(28)   | 1.377(17)  |
| N(3)-H(3A)   | 0.8600     |
| O(1)-C(29)   | 1.186(19)  |
| Cl(1)-C(31)  | 1.73(2)    |
| Cl(2)-C(31)  | 1.69(3)    |
| Cl(3)-C(32)  | 1.772(18)  |
| Cl(4)-C(32)  | 1.750(18)  |
| C(2)-C(7)    | 1.33(2)    |
| C(2)-C(3)    | 1.45(2)    |
| C(3)-C(4)    | 1.29(2)    |
| C(3)-H(3)    | 0.9300     |
| C(4)-C(5)    | 1.40(2)    |
| C(4)-H(4)    | 0.9300     |
| C(5)-C(6)    | 1.36(2)    |
| C(5)-H(5)    | 0.9300     |
| C(6)-C(7)    | 1.41(2)    |
| C(6)-H(6)    | 0.9300     |
| C(8)-H(8A)   | 0.9600     |
| C(8)-H(8B)   | 0.9600     |
| C(8)-H(8C)   | 0.9600     |
| C(9)-C(18)   | 1.37(2)    |
| C(9)-C(10)   | 1.448(18)  |
| C(10)-C(11)  | 1.339(19)  |
| C(10)-H(10)  | 0.9300     |
| C(11)-C(12)  | 1.45(2)    |
| C(11)-H(11)  | 0.9300     |
| C(12)-C(17)  | 1.38(2)    |
| C(12)-C(13)  | 1.46(2)    |
| C(13)-C(14)  | 1.25(3)    |
| C(13)-H(13)  | 0.9300     |
| C(14)-C(15)  | 1.39(2)    |
| C(14)-H(14)  | 0.9300     |
| C(15)-C(16)  | 1.35(2)    |
| C(15)-H(15)  | 0.9300     |
| C(16)-C(17)  | 1.44(2)    |
| C(16)-H(16)  | 0.9300     |
| C(17)-C(18)  | 1.411(19)  |
| C(18)-C(19)  | 1.496(19)  |
| C(19)-C(28)  | 1.377(19)  |
| C(19)-C(20)  | 1.419(19)  |
| C(20)-C(25)  | 1.34(2)    |
| C(20)-C(21)  | 1.41(2)    |
| C(21)-C(22)  | 1.48(2)    |
| C(21)-H(21)  | 0.9300     |
| C(22)-C(23)  | 1.43(3)    |
| C(22)-H(22)  | 0.9300     |
| C(23)-C(24)  | 1.29(3)    |
| C(23)-H(23)  | 0.9300     |
| C(24)-C(25)  | 1.53(2)    |
| C(24)-H(24)  | 0.9300     |
| C(25)-C(26)  | 1.45(3)    |
| C(26)-C(27)  | 1.30(2)    |
| C(26)-H(26)  | 0.9300     |
| C(27)-C(28)  | 1.42(2)    |
| C(27)-H(27)  | 0.9300     |
| C(29)-C(30)  | 1.41(2)    |
| C(30)-H(30A) | 0.9600     |
| C(30)-H(30B) | 0.9600     |
| C(30)-H(30C) | 0.9600     |

|                   |           |
|-------------------|-----------|
| C(31)-H(31A)      | 0.9700    |
| C(31)-H(31B)      | 0.9700    |
| C(32)-H(32A)      | 0.9700    |
| C(32)-H(32B)      | 0.9700    |
|                   |           |
| C(1)-Au(1)-I(1)   | 179.1(4)  |
| C(2)-N(1)-C(1)    | 106.9(12) |
| C(2)-N(1)-C(8)    | 129.5(14) |
| C(1)-N(1)-C(8)    | 122.4(13) |
| C(1)-N(2)-C(7)    | 110.4(13) |
| C(1)-N(2)-C(9)    | 122.5(12) |
| C(7)-N(2)-C(9)    | 126.6(12) |
| C(29)-N(3)-C(28)  | 133.1(14) |
| C(29)-N(3)-H(3A)  | 113.5     |
| C(28)-N(3)-H(3A)  | 113.5     |
| N(2)-C(1)-N(1)    | 107.6(12) |
| N(2)-C(1)-Au(1)   | 128.3(10) |
| N(1)-C(1)-Au(1)   | 123.5(10) |
| C(7)-C(2)-N(1)    | 108.7(14) |
| C(7)-C(2)-C(3)    | 118.9(17) |
| N(1)-C(2)-C(3)    | 132.2(15) |
| C(4)-C(3)-C(2)    | 119.4(16) |
| C(4)-C(3)-H(3)    | 120.3     |
| C(2)-C(3)-H(3)    | 120.3     |
| C(3)-C(4)-C(5)    | 121.6(15) |
| C(3)-C(4)-H(4)    | 119.2     |
| C(5)-C(4)-H(4)    | 119.2     |
| C(6)-C(5)-C(4)    | 121.0(15) |
| C(6)-C(5)-H(5)    | 119.5     |
| C(4)-C(5)-H(5)    | 119.5     |
| C(5)-C(6)-C(7)    | 117.0(16) |
| C(5)-C(6)-H(6)    | 121.5     |
| C(7)-C(6)-H(6)    | 121.5     |
| C(2)-C(7)-N(2)    | 106.0(14) |
| C(2)-C(7)-C(6)    | 121.9(16) |
| N(2)-C(7)-C(6)    | 131.6(14) |
| N(1)-C(8)-H(8A)   | 109.5     |
| N(1)-C(8)-H(8B)   | 109.5     |
| H(8A)-C(8)-H(8B)  | 109.5     |
| N(1)-C(8)-H(8C)   | 109.5     |
| H(8A)-C(8)-H(8C)  | 109.5     |
| H(8B)-C(8)-H(8C)  | 109.5     |
| C(18)-C(9)-C(10)  | 122.0(13) |
| C(18)-C(9)-N(2)   | 121.3(12) |
| C(10)-C(9)-N(2)   | 116.7(13) |
| C(11)-C(10)-C(9)  | 118.3(14) |
| C(11)-C(10)-H(10) | 120.8     |
| C(9)-C(10)-H(10)  | 120.8     |
| C(10)-C(11)-C(12) | 120.6(14) |
| C(10)-C(11)-H(11) | 119.7     |
| C(12)-C(11)-H(11) | 119.7     |
| C(17)-C(12)-C(11) | 120.1(15) |
| C(17)-C(12)-C(13) | 115.4(18) |
| C(11)-C(12)-C(13) | 124.3(17) |
| C(14)-C(13)-C(12) | 126(2)    |
| C(14)-C(13)-H(13) | 117.0     |
| C(12)-C(13)-H(13) | 117.0     |
| C(13)-C(14)-C(15) | 118.3(18) |
| C(13)-C(14)-H(14) | 120.9     |
| C(15)-C(14)-H(14) | 120.9     |
| C(16)-C(15)-C(14) | 121.7(18) |
| C(16)-C(15)-H(15) | 119.2     |
| C(14)-C(15)-H(15) | 119.2     |
| C(15)-C(16)-C(17) | 120.1(17) |
| C(15)-C(16)-H(16) | 120.0     |
| C(17)-C(16)-H(16) | 120.0     |
| C(12)-C(17)-C(18) | 119.8(15) |
| C(12)-C(17)-C(16) | 118.3(15) |
| C(18)-C(17)-C(16) | 121.7(15) |
| C(9)-C(18)-C(17)  | 119.1(13) |
| C(9)-C(18)-C(19)  | 119.6(12) |
| C(17)-C(18)-C(19) | 121.1(14) |

---

|                     |           |
|---------------------|-----------|
| C(28)-C(19)-C(20)   | 119.1(13) |
| C(28)-C(19)-C(18)   | 121.5(12) |
| C(20)-C(19)-C(18)   | 119.1(13) |
| C(25)-C(20)-C(21)   | 116.7(15) |
| C(25)-C(20)-C(19)   | 121.2(15) |
| C(21)-C(20)-C(19)   | 122.1(14) |
| C(20)-C(21)-C(22)   | 120.6(16) |
| C(20)-C(21)-H(21)   | 119.7     |
| C(22)-C(21)-H(21)   | 119.7     |
| C(23)-C(22)-C(21)   | 119(2)    |
| C(23)-C(22)-H(22)   | 120.4     |
| C(21)-C(22)-H(22)   | 120.4     |
| C(24)-C(23)-C(22)   | 121(2)    |
| C(24)-C(23)-H(23)   | 119.7     |
| C(22)-C(23)-H(23)   | 119.7     |
| C(23)-C(24)-C(25)   | 119(2)    |
| C(23)-C(24)-H(24)   | 120.4     |
| C(25)-C(24)-H(24)   | 120.4     |
| C(20)-C(25)-C(26)   | 118.2(16) |
| C(20)-C(25)-C(24)   | 123.2(16) |
| C(26)-C(25)-C(24)   | 118.2(18) |
| C(27)-C(26)-C(25)   | 120.3(17) |
| C(27)-C(26)-H(26)   | 119.8     |
| C(25)-C(26)-H(26)   | 119.8     |
| C(26)-C(27)-C(28)   | 122.1(18) |
| C(26)-C(27)-H(27)   | 118.9     |
| C(28)-C(27)-H(27)   | 118.9     |
| C(19)-C(28)-N(3)    | 122.4(12) |
| C(19)-C(28)-C(27)   | 118.5(14) |
| N(3)-C(28)-C(27)    | 119.1(15) |
| O(1)-C(29)-N(3)     | 114.4(17) |
| O(1)-C(29)-C(30)    | 125.0(17) |
| N(3)-C(29)-C(30)    | 120.5(16) |
| C(29)-C(30)-H(30A)  | 109.5     |
| C(29)-C(30)-H(30B)  | 109.5     |
| H(30A)-C(30)-H(30B) | 109.5     |
| C(29)-C(30)-H(30C)  | 109.5     |
| H(30A)-C(30)-H(30C) | 109.5     |
| H(30B)-C(30)-H(30C) | 109.5     |
| Cl(2)-C(31)-Cl(1)   | 112.7(15) |
| Cl(2)-C(31)-H(31A)  | 109.0     |
| Cl(1)-C(31)-H(31A)  | 109.0     |
| Cl(2)-C(31)-H(31B)  | 109.0     |
| Cl(1)-C(31)-H(31B)  | 109.0     |
| H(31A)-C(31)-H(31B) | 107.8     |
| Cl(4)-C(32)-Cl(3)   | 103.7(16) |
| Cl(4)-C(32)-H(32A)  | 111.0     |
| Cl(3)-C(32)-H(32A)  | 111.0     |
| Cl(4)-C(32)-H(32B)  | 111.0     |
| Cl(3)-C(32)-H(32B)  | 111.0     |
| H(32A)-C(32)-H(32B) | 109.0     |

---

Symmetry transformations used to generate equivalent atoms:

Table 4. Anisotropic displacement parameters ( $\text{\AA}^2 \times 10^3$ ) for cd29609.  
The anisotropic displacement factor exponent takes the form:  
 $-2 \pi^2 [ h^2 a^{*2} U_{11} + \dots + 2 h k a^* b^* U_{12} ]$

|       | U11     | U22     | U33     | U23     | U13     | U12     |
|-------|---------|---------|---------|---------|---------|---------|
| Au(1) | 53(1)   | 59(1)   | 69(1)   | 10(1)   | -4(1)   | 2(1)    |
| I(1)  | 103(1)  | 125(1)  | 81(1)   | 29(1)   | -12(1)  | -2(1)   |
| N(1)  | 62(8)   | 40(7)   | 74(8)   | 10(7)   | 9(9)    | 9(8)    |
| N(2)  | 69(10)  | 39(7)   | 41(7)   | -2(6)   | -5(6)   | 3(6)    |
| N(3)  | 42(8)   | 56(8)   | 66(8)   | -9(7)   | -13(6)  | -12(6)  |
| O(1)  | 320(30) | 45(8)   | 117(12) | -15(8)  | -26(17) | 6(15)   |
| Cl(1) | 123(6)  | 157(7)  | 270(10) | 71(7)   | -16(7)  | -5(7)   |
| Cl(2) | 143(7)  | 158(8)  | 153(7)  | -50(5)  | -15(5)  | 18(5)   |
| C(1)  | 39(8)   | 39(8)   | 59(8)   | -14(7)  | 0(7)    | 13(7)   |
| C(2)  | 43(8)   | 46(9)   | 103(13) | -25(10) | 4(10)   | -8(10)  |
| C(3)  | 56(10)  | 75(12)  | 98(13)  | -34(11) | -16(12) | -10(11) |
| C(4)  | 85(12)  | 108(16) | 38(8)   | -2(9)   | -21(10) | -1(14)  |
| C(5)  | 106(15) | 86(13)  | 38(9)   | 3(8)    | 5(10)   | 23(14)  |
| C(6)  | 38(10)  | 73(11)  | 67(11)  | -2(9)   | -11(8)  | 3(8)    |
| C(7)  | 27(8)   | 44(9)   | 83(12)  | -12(8)  | -5(7)   | 4(6)    |
| C(8)  | 115(17) | 40(10)  | 129(16) | -13(10) | 6(16)   | -5(12)  |
| C(9)  | 51(9)   | 44(9)   | 39(8)   | -1(7)   | 2(7)    | -4(7)   |
| C(10) | 44(9)   | 59(9)   | 45(8)   | 10(7)   | -18(7)  | -13(7)  |
| C(11) | 57(9)   | 79(10)  | 42(8)   | -13(8)  | -8(9)   | 2(10)   |
| C(12) | 74(11)  | 43(10)  | 72(12)  | 9(8)    | -16(9)  | -15(8)  |
| C(13) | 161(3)  | 58(12)  | 60(11)  | -25(9)  | 0(13)   | -25(14) |
| C(14) | 67(12)  | 70(14)  | 105(16) | -32(11) | -15(11) | 14(10)  |
| C(15) | 86(13)  | 60(11)  | 97(13)  | -15(9)  | -3(13)  | 40(11)  |
| C(16) | 54(11)  | 64(11)  | 67(10)  | -15(8)  | 5(8)    | -1(8)   |
| C(17) | 49(11)  | 46(9)   | 62(9)   | 5(8)    | 11(8)   | -2(7)   |
| C(18) | 29(6)   | 53(9)   | 55(8)   | -11(6)  | 3(8)    | -7(8)   |
| C(19) | 50(8)   | 36(8)   | 37(8)   | -9(7)   | -9(7)   | 10(7)   |
| C(20) | 33(8)   | 45(9)   | 61(10)  | -9(7)   | -3(7)   | 8(6)    |
| C(21) | 43(9)   | 58(11)  | 82(12)  | -26(9)  | -2(8)   | 16(8)   |
| C(22) | 85(13)  | 77(13)  | 77(12)  | 47(10)  | 2(11)   | 43(11)  |
| C(23) | 85(19)  | 230(30) | 73(15)  | -10(19) | -18(13) | 70(20)  |
| C(24) | 65(14)  | 75(13)  | 65(12)  | 3(9)    | -4(9)   | 4(10)   |
| C(25) | 62(11)  | 46(9)   | 101(13) | -14(9)  | 2(12)   | 15(11)  |
| C(26) | 49(10)  | 76(14)  | 99(15)  | -47(12) | -21(10) | 22(9)   |
| C(27) | 43(9)   | 73(13)  | 86(13)  | 6(11)   | 7(9)    | 11(8)   |
| C(28) | 22(8)   | 70(10)  | 44(8)   | -21(8)  | -1(6)   | 5(7)    |
| C(29) | 89(14)  | 53(12)  | 84(12)  | 0(10)   | -13(11) | -17(10) |
| C(30) | 84(14)  | 61(11)  | 87(12)  | 16(9)   | -38(10) | -4(10)  |
| C(31) | 110(20) | 170(20) | 90(14)  | 11(16)  | 29(13)  | 50(20)  |

Table 5. Hydrogen coordinates ( $\times 10^4$ ) and isotropic displacement parameters ( $\text{\AA}^2 \times 10^3$ ) for cd29609.

|        | x     | y    | z    | U(eq) |
|--------|-------|------|------|-------|
| H(3A)  | 4455  | 4758 | 1399 | 66    |
| H(3)   | 8824  | 2753 | -228 | 91    |
| H(4)   | 8785  | 3772 | -771 | 92    |
| H(5)   | 8581  | 5367 | -644 | 92    |
| H(6)   | 8291  | 5938 | 54   | 71    |
| H(8A)  | 7762  | 2023 | 795  | 142   |
| H(8B)  | 9576  | 2189 | 1024 | 142   |
| H(8C)  | 9505  | 1960 | 526  | 142   |
| H(10)  | 10321 | 5705 | 1334 | 59    |
| H(11)  | 9695  | 7012 | 1731 | 72    |
| H(13)  | 7356  | 8216 | 1986 | 112   |
| H(14)  | 4866  | 8916 | 1928 | 96    |
| H(15)  | 2809  | 8361 | 1435 | 97    |
| H(16)  | 3341  | 7062 | 1031 | 74    |
| H(21)  | 6006  | 7246 | 367  | 73    |
| H(22)  | 5812  | 7810 | -370 | 96    |
| H(23)  | 4132  | 6963 | -882 | 156   |
| H(24)  | 2643  | 5694 | -678 | 82    |
| H(26)  | 2040  | 4446 | -112 | 89    |
| H(27)  | 2344  | 3837 | 545  | 80    |
| H(30A) | 3087  | 2920 | 1855 | 117   |
| H(30B) | 4249  | 3809 | 1940 | 117   |
| H(30C) | 5139  | 2844 | 1833 | 117   |
| H(31A) | 3957  | 6397 | 2652 | 148   |
| H(31B) | 4392  | 6757 | 2183 | 148   |
| H(32A) | 42    | 6461 | 3032 | 267   |
| H(32B) | -6    | 5419 | 2858 | 267   |

Table 6. Torsion angles [deg] for cd29609.

|                         |            |
|-------------------------|------------|
| C(7)-N(2)-C(1)-N(1)     | 4.1(17)    |
| C(9)-N(2)-C(1)-N(1)     | 176.0(13)  |
| C(7)-N(2)-C(1)-Au(1)    | 175.1(10)  |
| C(9)-N(2)-C(1)-Au(1)    | -13(2)     |
| C(2)-N(1)-C(1)-N(2)     | -5.9(18)   |
| C(8)-N(1)-C(1)-N(2)     | -174.6(17) |
| C(2)-N(1)-C(1)-Au(1)    | -177.4(11) |
| C(8)-N(1)-C(1)-Au(1)    | 14(2)      |
| I(1)-Au(1)-C(1)-N(2)    | 172(25)    |
| I(1)-Au(1)-C(1)-N(1)    | -18(27)    |
| C(1)-N(1)-C(2)-C(7)     | 5.5(19)    |
| C(8)-N(1)-C(2)-C(7)     | 173.1(18)  |
| C(1)-N(1)-C(2)-C(3)     | -179.8(17) |
| C(8)-N(1)-C(2)-C(3)     | -12(3)     |
| C(7)-C(2)-C(3)-C(4)     | 4(3)       |
| N(1)-C(2)-C(3)-C(4)     | -170.5(19) |
| C(2)-C(3)-C(4)-C(5)     | 0(3)       |
| C(3)-C(4)-C(5)-C(6)     | -2(3)      |
| C(4)-C(5)-C(6)-C(7)     | 0(3)       |
| N(1)-C(2)-C(7)-N(2)     | -3.0(18)   |
| C(3)-C(2)-C(7)-N(2)     | -178.5(14) |
| N(1)-C(2)-C(7)-C(6)     | 169.7(13)  |
| C(3)-C(2)-C(7)-C(6)     | -6(2)      |
| C(1)-N(2)-C(7)-C(2)     | -0.7(17)   |
| C(9)-N(2)-C(7)-C(2)     | -172.2(14) |
| C(1)-N(2)-C(7)-C(6)     | -172.4(14) |
| C(9)-N(2)-C(7)-C(6)     | 16(2)      |
| C(5)-C(6)-C(7)-C(2)     | 4(2)       |
| C(5)-C(6)-C(7)-N(2)     | 174.6(15)  |
| C(1)-N(2)-C(9)-C(18)    | -109.6(17) |
| C(7)-N(2)-C(9)-C(18)    | 61(2)      |
| C(1)-N(2)-C(9)-C(10)    | 68.6(18)   |
| C(7)-N(2)-C(9)-C(10)    | -120.9(15) |
| C(18)-C(9)-C(10)-C(11)  | 0(2)       |
| N(2)-C(9)-C(10)-C(11)   | -177.7(12) |
| C(9)-C(10)-C(11)-C(12)  | 1(2)       |
| C(10)-C(11)-C(12)-C(17) | 1(2)       |
| C(10)-C(11)-C(12)-C(13) | 175.4(15)  |
| C(17)-C(12)-C(13)-C(14) | -7(3)      |
| C(11)-C(12)-C(13)-C(14) | 178(2)     |
| C(12)-C(13)-C(14)-C(15) | 3(3)       |
| C(13)-C(14)-C(15)-C(16) | 2(3)       |
| C(14)-C(15)-C(16)-C(17) | -2(3)      |
| C(11)-C(12)-C(17)-C(18) | -4(2)      |
| C(13)-C(12)-C(17)-C(18) | -178.7(14) |
| C(11)-C(12)-C(17)-C(16) | -178.4(14) |
| C(13)-C(12)-C(17)-C(16) | 7(2)       |
| C(15)-C(16)-C(17)-C(12) | -3(2)      |
| C(15)-C(16)-C(17)-C(18) | -177.5(15) |
| C(10)-C(9)-C(18)-C(17)  | -3(2)      |
| N(2)-C(9)-C(18)-C(17)   | 174.8(12)  |
| C(10)-C(9)-C(18)-C(19)  | -179.3(12) |
| N(2)-C(9)-C(18)-C(19)   | -1(2)      |
| C(12)-C(17)-C(18)-C(9)  | 5(2)       |
| C(16)-C(17)-C(18)-C(9)  | 179.2(14)  |
| C(12)-C(17)-C(18)-C(19) | -179.0(14) |
| C(16)-C(17)-C(18)-C(19) | -5(2)      |
| C(9)-C(18)-C(19)-C(28)  | 72.4(19)   |
| C(17)-C(18)-C(19)-C(28) | -103.6(16) |
| C(9)-C(18)-C(19)-C(20)  | -101.6(15) |
| C(17)-C(18)-C(19)-C(20) | 82.4(16)   |
| C(28)-C(19)-C(20)-C(25) | -6(2)      |
| C(18)-C(19)-C(20)-C(25) | 168.2(15)  |
| C(28)-C(19)-C(20)-C(21) | 176.6(13)  |
| C(18)-C(19)-C(20)-C(21) | -9.3(19)   |
| C(25)-C(20)-C(21)-C(22) | -4(2)      |
| C(19)-C(20)-C(21)-C(22) | 173.2(13)  |
| C(20)-C(21)-C(22)-C(23) | 4(2)       |

---

|                         |            |
|-------------------------|------------|
| C(21)-C(22)-C(23)-C(24) | 1(3)       |
| C(22)-C(23)-C(24)-C(25) | -6(3)      |
| C(21)-C(20)-C(25)-C(26) | -174.5(13) |
| C(19)-C(20)-C(25)-C(26) | 8(2)       |
| C(21)-C(20)-C(25)-C(24) | -1(2)      |
| C(19)-C(20)-C(25)-C(24) | -178.3(14) |
| C(23)-C(24)-C(25)-C(20) | 6(3)       |
| C(23)-C(24)-C(25)-C(26) | -179.9(18) |
| C(20)-C(25)-C(26)-C(27) | -5(2)      |
| C(24)-C(25)-C(26)-C(27) | -178.7(16) |
| C(25)-C(26)-C(27)-C(28) | -1(2)      |
| C(20)-C(19)-C(28)-N(3)  | -177.1(12) |
| C(18)-C(19)-C(28)-N(3)  | 9(2)       |
| C(20)-C(19)-C(28)-C(27) | 0(2)       |
| C(18)-C(19)-C(28)-C(27) | -173.6(13) |
| C(29)-N(3)-C(28)-C(19)  | -152.7(18) |
| C(29)-N(3)-C(28)-C(27)  | 30(2)      |
| C(26)-C(27)-C(28)-C(19) | 3(2)       |
| C(26)-C(27)-C(28)-N(3)  | -179.5(15) |
| C(28)-N(3)-C(29)-O(1)   | 9(3)       |
| C(28)-N(3)-C(29)-C(30)  | -173.7(16) |

---

Symmetry transformations used to generate equivalent atoms:

Table 7. Hydrogen bonds for cd29609 [Å and deg.].

| D-H...A | d(D-H) | d(H...A) | d(D...A) | <(DHA) |
|---------|--------|----------|----------|--------|
|---------|--------|----------|----------|--------|

**(I) X-ray Crystal Data of Complex 6.**

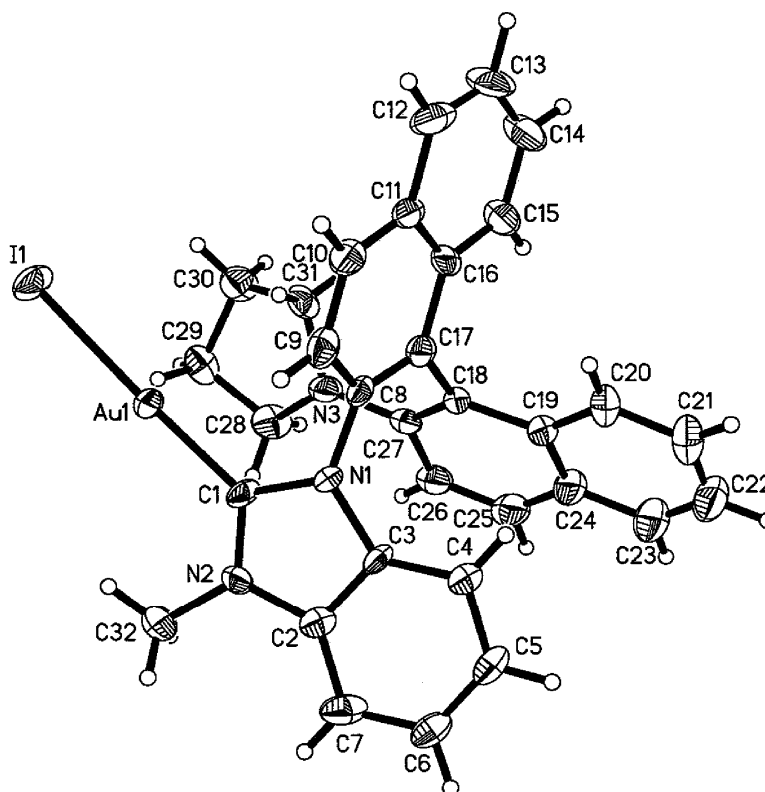

The crystal data of **6** have been deposited in CCDC with number 790740. Empirical Formula:  $C_{32}H_{27}AuIN_3$ ; Formula Weight: 777.43; Crystal Color, Habit: colorless; Crystal Dimensions: 0.350 x 0.280 x 0.221 mm; Crystal System: Monoclinic; Lattice Parameters:  $a = 12.8532(14)\text{\AA}$ ,  $b = 7.4498(8)\text{\AA}$ ,  $c = 14.7707(17)\text{\AA}$ ,  $\alpha = 90^\circ$ ,  $\beta = 90.459(2)^\circ$ ,  $\gamma = 90^\circ$ ,  $V = 1414.3(3)\text{\AA}^3$ ; Space group:  $P2(1)$ ;  $Z = 2$ ;  $D_{calc} = 1.826\text{ g/cm}^3$ ;  $F_{000} = 744$ ; Diffractometer: Bruker Smart CCD; Residuals:  $R$ ;  $R_w$ : 0.0406, 0.0790.

Table 1. Crystal data and structure refinement for cd201441.

|                                   |                                                                                                                          |
|-----------------------------------|--------------------------------------------------------------------------------------------------------------------------|
| Identification code               | cd201441                                                                                                                 |
| Empirical formula                 | C32 H27 Au I N3                                                                                                          |
| Formula weight                    | 777.43                                                                                                                   |
| Temperature                       | 293(2) K                                                                                                                 |
| Wavelength                        | 0.71073 Å                                                                                                                |
| Crystal system, space group       | Monoclinic, P2(1)                                                                                                        |
| Unit cell dimensions              | a = 12.8532(14) Å    alpha = 90 deg.<br>b = 7.4498(8) Å    beta = 90.459(2) deg.<br>c = 14.7707(17) Å    gamma = 90 deg. |
| Volume                            | 1414.3(3) Å <sup>3</sup>                                                                                                 |
| Z, Calculated density             | 2, 1.826 Mg/m <sup>3</sup>                                                                                               |
| Absorption coefficient            | 6.317 mm <sup>-1</sup>                                                                                                   |
| F(000)                            | 744                                                                                                                      |
| Crystal size                      | 0.350 x 0.280 x 0.221 mm                                                                                                 |
| Theta range for data collection   | 2.09 to 27.00 deg.                                                                                                       |
| Limiting indices                  | -8<=h<=16, -9<=k<=9, -17<=l<=18                                                                                          |
| Reflections collected / unique    | 8321 / 5923 [R(int) = 0.0359]                                                                                            |
| Completeness to theta = 27.00     | 99.5 %                                                                                                                   |
| Absorption correction             | Empirical                                                                                                                |
| Max. and min. transmission        | 1.0000 and 0.4093                                                                                                        |
| Refinement method                 | Full-matrix least-squares on F <sup>2</sup>                                                                              |
| Data / restraints / parameters    | 5923 / 1 / 336                                                                                                           |
| Goodness-of-fit on F <sup>2</sup> | 0.904                                                                                                                    |
| Final R indices [I>2sigma(I)]     | R1 = 0.0406, wR2 = 0.0790                                                                                                |
| R indices (all data)              | R1 = 0.0499, wR2 = 0.0824                                                                                                |
| Absolute structure parameter      | 0.021(7)                                                                                                                 |
| Extinction coefficient            | 0.00158(18)                                                                                                              |
| Largest diff. peak and hole       | 1.099 and -0.947 e.Å <sup>-3</sup>                                                                                       |

Table 2. Atomic coordinates ( $\times 10^4$ ) and equivalent isotropic displacement parameters ( $\text{\AA}^2 \times 10^3$ ) for cd201441. U(eq) is defined as one third of the trace of the orthogonalized  $U_{ij}$  tensor.

|       | x         | y        | z        | U(eq)  |
|-------|-----------|----------|----------|--------|
| Au(1) | 5717(1)   | 7235(1)  | 8588(1)  | 42(1)  |
| I(1)  | 3741(1)   | 7336(2)  | 8466(1)  | 64(1)  |
| N(1)  | 7884(4)   | 6891(10) | 7903(4)  | 38(2)  |
| N(2)  | 7896(4)   | 7229(18) | 9352(3)  | 43(1)  |
| N(3)  | 6820(5)   | 2909(9)  | 8048(4)  | 47(2)  |
| C(1)  | 7261(5)   | 7069(19) | 8633(4)  | 37(2)  |
| C(2)  | 8935(5)   | 7110(20) | 9103(5)  | 45(2)  |
| C(3)  | 8937(5)   | 6905(13) | 8170(5)  | 41(2)  |
| C(4)  | 9840(6)   | 6811(11) | 7680(6)  | 49(3)  |
| C(5)  | 10744(6)  | 6886(18) | 8162(7)  | 67(4)  |
| C(6)  | 10752(6)  | 7110(30) | 9100(7)  | 69(3)  |
| C(7)  | 9851(6)   | 7230(30) | 9593(5)  | 61(2)  |
| C(8)  | 7465(5)   | 6721(10) | 6996(5)  | 37(2)  |
| C(9)  | 6946(7)   | 8190(13) | 6618(6)  | 51(2)  |
| C(10) | 6480(7)   | 8033(14) | 5790(6)  | 51(2)  |
| C(11) | 6518(7)   | 6427(15) | 5313(6)  | 52(3)  |
| C(12) | 6019(7)   | 6226(17) | 4451(7)  | 71(3)  |
| C(13) | 6093(9)   | 4660(20) | 4000(7)  | 89(4)  |
| C(14) | 6642(9)   | 3205(16) | 4351(7)  | 76(3)  |
| C(15) | 7118(7)   | 3335(14) | 5178(6)  | 63(3)  |
| C(16) | 7077(6)   | 4939(12) | 5663(5)  | 44(2)  |
| C(17) | 7568(6)   | 5119(11) | 6538(5)  | 42(2)  |
| C(18) | 8194(6)   | 3607(10) | 6960(5)  | 38(2)  |
| C(19) | 9195(6)   | 3265(12) | 6620(6)  | 47(2)  |
| C(20) | 9566(8)   | 4078(14) | 5801(7)  | 66(3)  |
| C(21) | 10550(10) | 3755(18) | 5519(8)  | 90(4)  |
| C(22) | 11229(9)  | 2540(40) | 6029(11) | 124(7) |
| C(23) | 10890(8)  | 1783(18) | 6794(9)  | 87(5)  |
| C(24) | 9881(6)   | 2090(20) | 7104(6)  | 61(3)  |
| C(25) | 9515(8)   | 1370(12) | 7914(8)  | 65(3)  |
| C(26) | 8545(7)   | 1629(11) | 8222(6)  | 54(2)  |
| C(27) | 7838(6)   | 2714(9)  | 7727(5)  | 39(2)  |
| C(28) | 6525(6)   | 2250(20) | 8931(5)  | 58(2)  |
| C(29) | 5367(6)   | 2488(18) | 8950(5)  | 55(3)  |
| C(30) | 5040(6)   | 2230(30) | 7976(5)  | 64(2)  |
| C(31) | 5909(7)   | 3089(12) | 7441(5)  | 49(2)  |
| C(32) | 7560(6)   | 7470(20) | 10288(5) | 63(3)  |

Table 3. Bond lengths [Å] and angles [deg] for cd201441.

---

|              |           |
|--------------|-----------|
| Au(1)-C(1)   | 1.988(6)  |
| Au(1)-I(1)   | 2.5462(6) |
| N(1)-C(1)    | 1.355(8)  |
| N(1)-C(3)    | 1.407(8)  |
| N(1)-C(8)    | 1.445(9)  |
| N(2)-C(1)    | 1.339(8)  |
| N(2)-C(2)    | 1.390(8)  |
| N(2)-C(32)   | 1.462(8)  |
| N(3)-C(27)   | 1.402(9)  |
| N(3)-C(28)   | 1.447(9)  |
| N(3)-C(31)   | 1.476(10) |
| C(2)-C(7)    | 1.379(10) |
| C(2)-C(3)    | 1.387(10) |
| C(3)-C(4)    | 1.375(10) |
| C(4)-C(5)    | 1.360(11) |
| C(4)-H(4)    | 0.9300    |
| C(5)-C(6)    | 1.395(13) |
| C(5)-H(5)    | 0.9300    |
| C(6)-C(7)    | 1.375(11) |
| C(6)-H(6)    | 0.9300    |
| C(7)-H(7)    | 0.9300    |
| C(8)-C(17)   | 1.379(11) |
| C(8)-C(9)    | 1.396(10) |
| C(9)-C(10)   | 1.363(13) |
| C(9)-H(9)    | 0.9300    |
| C(10)-C(11)  | 1.390(12) |
| C(10)-H(10)  | 0.9300    |
| C(11)-C(16)  | 1.417(13) |
| C(11)-C(12)  | 1.429(13) |
| C(12)-C(13)  | 1.350(16) |
| C(12)-H(12)  | 0.9300    |
| C(13)-C(14)  | 1.388(16) |
| C(13)-H(13)  | 0.9300    |
| C(14)-C(15)  | 1.366(13) |
| C(14)-H(14)  | 0.9300    |
| C(15)-C(16)  | 1.395(12) |
| C(15)-H(15)  | 0.9300    |
| C(16)-C(17)  | 1.439(11) |
| C(17)-C(18)  | 1.515(11) |
| C(18)-C(27)  | 1.395(10) |
| C(18)-C(19)  | 1.408(10) |
| C(19)-C(24)  | 1.430(15) |
| C(19)-C(20)  | 1.438(13) |
| C(20)-C(21)  | 1.356(13) |
| C(20)-H(20)  | 0.9300    |
| C(21)-C(22)  | 1.46(2)   |
| C(21)-H(21)  | 0.9300    |
| C(22)-C(23)  | 1.34(2)   |
| C(22)-H(22)  | 0.9300    |
| C(23)-C(24)  | 1.397(12) |
| C(23)-H(23)  | 0.9300    |
| C(24)-C(25)  | 1.395(14) |
| C(25)-C(26)  | 1.345(12) |
| C(25)-H(25)  | 0.9300    |
| C(26)-C(27)  | 1.415(10) |
| C(26)-H(26)  | 0.9300    |
| C(28)-C(29)  | 1.499(11) |
| C(28)-H(28A) | 0.9700    |
| C(28)-H(28B) | 0.9700    |
| C(29)-C(30)  | 1.509(11) |
| C(29)-H(29A) | 0.9700    |
| C(29)-H(29B) | 0.9700    |
| C(30)-C(31)  | 1.515(11) |

---

|              |        |
|--------------|--------|
| C(30)-H(30A) | 0.9700 |
| C(30)-H(30B) | 0.9700 |
| C(31)-H(31A) | 0.9700 |
| C(31)-H(31B) | 0.9700 |
| C(32)-H(32A) | 0.9600 |
| C(32)-H(32B) | 0.9600 |
| C(32)-H(32C) | 0.9600 |

|                   |           |
|-------------------|-----------|
| C(1)-Au(1)-I(1)   | 177.1(3)  |
| C(1)-N(1)-C(3)    | 110.5(6)  |
| C(1)-N(1)-C(8)    | 121.9(6)  |
| C(3)-N(1)-C(8)    | 127.6(6)  |
| C(1)-N(2)-C(2)    | 111.4(5)  |
| C(1)-N(2)-C(32)   | 125.3(6)  |
| C(2)-N(2)-C(32)   | 123.3(6)  |
| C(27)-N(3)-C(28)  | 121.4(7)  |
| C(27)-N(3)-C(31)  | 122.8(6)  |
| C(28)-N(3)-C(31)  | 111.5(6)  |
| N(2)-C(1)-N(1)    | 106.2(5)  |
| N(2)-C(1)-Au(1)   | 128.5(5)  |
| N(1)-C(1)-Au(1)   | 125.1(5)  |
| C(7)-C(2)-C(3)    | 121.3(7)  |
| C(7)-C(2)-N(2)    | 132.5(8)  |
| C(3)-C(2)-N(2)    | 106.2(6)  |
| C(4)-C(3)-C(2)    | 122.5(7)  |
| C(4)-C(3)-N(1)    | 131.8(7)  |
| C(2)-C(3)-N(1)    | 105.6(6)  |
| C(5)-C(4)-C(3)    | 116.3(9)  |
| C(5)-C(4)-H(4)    | 121.8     |
| C(3)-C(4)-H(4)    | 121.8     |
| C(4)-C(5)-C(6)    | 121.6(8)  |
| C(4)-C(5)-H(5)    | 119.2     |
| C(6)-C(5)-H(5)    | 119.2     |
| C(7)-C(6)-C(5)    | 122.3(8)  |
| C(7)-C(6)-H(6)    | 118.9     |
| C(5)-C(6)-H(6)    | 118.9     |
| C(6)-C(7)-C(2)    | 115.9(8)  |
| C(6)-C(7)-H(7)    | 122.0     |
| C(2)-C(7)-H(7)    | 122.0     |
| C(17)-C(8)-C(9)   | 122.0(8)  |
| C(17)-C(8)-N(1)   | 119.6(7)  |
| C(9)-C(8)-N(1)    | 118.4(7)  |
| C(10)-C(9)-C(8)   | 119.8(9)  |
| C(10)-C(9)-H(9)   | 120.1     |
| C(8)-C(9)-H(9)    | 120.1     |
| C(9)-C(10)-C(11)  | 120.8(9)  |
| C(9)-C(10)-H(10)  | 119.6     |
| C(11)-C(10)-H(10) | 119.6     |
| C(10)-C(11)-C(16) | 120.6(8)  |
| C(10)-C(11)-C(12) | 121.6(9)  |
| C(16)-C(11)-C(12) | 117.8(10) |
| C(13)-C(12)-C(11) | 119.8(10) |
| C(13)-C(12)-H(12) | 120.1     |
| C(11)-C(12)-H(12) | 120.1     |
| C(12)-C(13)-C(14) | 121.9(10) |
| C(12)-C(13)-H(13) | 119.1     |
| C(14)-C(13)-H(13) | 119.1     |
| C(15)-C(14)-C(13) | 120.1(11) |
| C(15)-C(14)-H(14) | 120.0     |
| C(13)-C(14)-H(14) | 120.0     |
| C(14)-C(15)-C(16) | 120.1(10) |
| C(14)-C(15)-H(15) | 119.9     |
| C(16)-C(15)-H(15) | 119.9     |
| C(15)-C(16)-C(11) | 120.2(9)  |
| C(15)-C(16)-C(17) | 121.5(9)  |
| C(11)-C(16)-C(17) | 118.2(8)  |
| C(8)-C(17)-C(16)  | 118.5(8)  |

|                     |           |
|---------------------|-----------|
| C(8)-C(17)-C(18)    | 119.6(7)  |
| C(16)-C(17)-C(18)   | 121.9(7)  |
| C(27)-C(18)-C(19)   | 120.7(7)  |
| C(27)-C(18)-C(17)   | 120.8(6)  |
| C(19)-C(18)-C(17)   | 118.2(7)  |
| C(18)-C(19)-C(24)   | 119.6(8)  |
| C(18)-C(19)-C(20)   | 122.2(8)  |
| C(24)-C(19)-C(20)   | 118.1(8)  |
| C(21)-C(20)-C(19)   | 120.0(11) |
| C(21)-C(20)-H(20)   | 120.0     |
| C(19)-C(20)-H(20)   | 120.0     |
| C(20)-C(21)-C(22)   | 120.4(12) |
| C(20)-C(21)-H(21)   | 119.8     |
| C(22)-C(21)-H(21)   | 119.8     |
| C(23)-C(22)-C(21)   | 119.9(11) |
| C(23)-C(22)-H(22)   | 120.1     |
| C(21)-C(22)-H(22)   | 120.1     |
| C(22)-C(23)-C(24)   | 121.1(14) |
| C(22)-C(23)-H(23)   | 119.4     |
| C(24)-C(23)-H(23)   | 119.4     |
| C(25)-C(24)-C(23)   | 122.6(11) |
| C(25)-C(24)-C(19)   | 116.9(8)  |
| C(23)-C(24)-C(19)   | 120.4(11) |
| C(26)-C(25)-C(24)   | 123.7(9)  |
| C(26)-C(25)-H(25)   | 118.1     |
| C(24)-C(25)-H(25)   | 118.1     |
| C(25)-C(26)-C(27)   | 120.1(9)  |
| C(25)-C(26)-H(26)   | 120.0     |
| C(27)-C(26)-H(26)   | 120.0     |
| C(18)-C(27)-N(3)    | 122.6(7)  |
| C(18)-C(27)-C(26)   | 118.6(7)  |
| N(3)-C(27)-C(26)    | 118.8(7)  |
| N(3)-C(28)-C(29)    | 104.2(6)  |
| N(3)-C(28)-H(28A)   | 110.9     |
| C(29)-C(28)-H(28A)  | 110.9     |
| N(3)-C(28)-H(28B)   | 110.9     |
| C(29)-C(28)-H(28B)  | 110.9     |
| H(28A)-C(28)-H(28B) | 108.9     |
| C(28)-C(29)-C(30)   | 103.6(6)  |
| C(28)-C(29)-H(29A)  | 111.0     |
| C(30)-C(29)-H(29A)  | 111.0     |
| C(28)-C(29)-H(29B)  | 111.0     |
| C(30)-C(29)-H(29B)  | 111.0     |
| H(29A)-C(29)-H(29B) | 109.0     |
| C(29)-C(30)-C(31)   | 104.1(7)  |
| C(29)-C(30)-H(30A)  | 110.9     |
| C(31)-C(30)-H(30A)  | 110.9     |
| C(29)-C(30)-H(30B)  | 110.9     |
| C(31)-C(30)-H(30B)  | 110.9     |
| H(30A)-C(30)-H(30B) | 109.0     |
| N(3)-C(31)-C(30)    | 103.3(7)  |
| N(3)-C(31)-H(31A)   | 111.1     |
| C(30)-C(31)-H(31A)  | 111.1     |
| N(3)-C(31)-H(31B)   | 111.1     |
| C(30)-C(31)-H(31B)  | 111.1     |
| H(31A)-C(31)-H(31B) | 109.1     |
| N(2)-C(32)-H(32A)   | 109.5     |
| N(2)-C(32)-H(32B)   | 109.5     |
| H(32A)-C(32)-H(32B) | 109.5     |
| N(2)-C(32)-H(32C)   | 109.5     |
| H(32A)-C(32)-H(32C) | 109.5     |
| H(32B)-C(32)-H(32C) | 109.5     |

---

Symmetry transformations used to generate equivalent atoms:

---

Table 4. Anisotropic displacement parameters ( $\text{\AA}^2 \times 10^3$ ) for cd201441.  
The anisotropic displacement factor exponent takes the form:  
 $-2 \pi^2 [ h^2 a^{*2} U_{11} + \dots + 2 h k a^* b^* U_{12} ]$

|       | U11   | U22     | U33     | U23     | U13    | U12     |
|-------|-------|---------|---------|---------|--------|---------|
| Au(1) | 27(1) | 58(1)   | 41(1)   | -4(1)   | 6(1)   | -5(1)   |
| I(1)  | 29(1) | 108(1)  | 57(1)   | 14(1)   | 4(1)   | -8(1)   |
| N(1)  | 21(3) | 55(6)   | 40(3)   | -8(3)   | -3(2)  | 1(3)    |
| N(2)  | 39(3) | 52(3)   | 36(3)   | -15(7)  | 2(2)   | -11(6)  |
| N(3)  | 41(4) | 67(5)   | 34(4)   | 2(3)    | -3(3)  | -7(3)   |
| C(1)  | 21(3) | 51(6)   | 39(4)   | 13(6)   | 1(3)   | -11(5)  |
| C(2)  | 37(4) | 49(5)   | 49(4)   | 1(7)    | -5(3)  | -4(6)   |
| C(3)  | 18(3) | 52(7)   | 53(4)   | -4(4)   | -1(3)  | 0(3)    |
| C(4)  | 33(4) | 58(8)   | 54(5)   | -6(4)   | -4(3)  | -2(4)   |
| C(5)  | 29(4) | 89(12)  | 82(7)   | -7(7)   | -3(4)  | 13(5)   |
| C(6)  | 36(4) | 92(8)   | 79(6)   | -1(11)  | -20(4) | 19(9)   |
| C(7)  | 56(5) | 77(5)   | 49(5)   | 17(10)  | -19(4) | -19(10) |
| C(8)  | 23(4) | 51(6)   | 37(4)   | 8(3)    | 6(3)   | 3(3)    |
| C(9)  | 38(5) | 61(5)   | 53(6)   | 7(5)    | 15(5)  | 2(4)    |
| C(10) | 42(5) | 74(6)   | 38(6)   | 17(5)   | 2(5)   | 7(4)    |
| C(11) | 30(5) | 97(7)   | 28(5)   | 10(5)   | 2(4)   | 0(4)    |
| C(12) | 38(5) | 120(9)  | 55(6)   | 25(6)   | -12(5) | -10(5)  |
| C(13) | 78(8) | 158(13) | 29(6)   | 8(7)    | -18(5) | -14(8)  |
| C(14) | 90(8) | 99(8)   | 40(6)   | -17(6)  | -5(6)  | -7(6)   |
| C(15) | 61(6) | 85(7)   | 44(6)   | -14(5)  | 4(5)   | -12(5)  |
| C(16) | 39(5) | 70(5)   | 25(4)   | 0(4)    | 8(3)   | -14(4)  |
| C(17) | 32(4) | 58(5)   | 37(5)   | 4(4)    | 5(3)   | -7(4)   |
| C(18) | 32(4) | 49(5)   | 34(4)   | -7(4)   | 2(3)   | -2(3)   |
| C(19) | 38(5) | 57(5)   | 47(6)   | -14(4)  | 0(4)   | 1(4)    |
| C(20) | 54(6) | 84(7)   | 60(7)   | -10(5)  | 18(5)  | 11(5)   |
| C(21) | 70(8) | 130(11) | 71(8)   | -11(7)  | 30(7)  | 12(7)   |
| C(22) | 50(6) | 180(20) | 139(12) | -85(16) | 18(8)  | 1(12)   |
| C(23) | 60(7) | 103(13) | 100(9)  | -22(8)  | 6(6)   | 25(7)   |
| C(24) | 47(4) | 67(7)   | 70(6)   | -15(9)  | -1(4)  | 14(7)   |
| C(25) | 59(7) | 59(5)   | 77(8)   | -18(5)  | -19(5) | 21(5)   |
| C(26) | 58(6) | 56(6)   | 47(5)   | -3(4)   | -12(4) | 2(4)    |
| C(27) | 44(4) | 40(6)   | 32(4)   | -4(3)   | -9(3)  | -1(3)   |
| C(28) | 66(5) | 68(5)   | 40(4)   | 26(8)   | -1(4)  | -11(9)  |
| C(29) | 72(5) | 48(7)   | 45(4)   | 6(5)    | 19(4)  | -16(5)  |
| C(30) | 62(5) | 69(5)   | 60(5)   | -6(10)  | 3(4)   | -21(9)  |
| C(31) | 60(6) | 60(5)   | 29(4)   | 1(4)    | 8(4)   | -4(4)   |
| C(32) | 59(5) | 96(9)   | 35(4)   | -11(7)  | 3(3)   | 1(7)    |

Table 5. Hydrogen coordinates ( $\times 10^4$ ) and isotropic displacement parameters ( $\text{\AA}^2 \times 10^3$ ) for cd201441.

|        | x     | y    | z     | U(eq) |
|--------|-------|------|-------|-------|
| H(4)   | 9833  | 6702 | 7052  | 58    |
| H(5)   | 11373 | 6783 | 7860  | 80    |
| H(6)   | 11388 | 7188 | 9402  | 83    |
| H(7)   | 9859  | 7371 | 10218 | 73    |
| H(9)   | 6919  | 9273 | 6930  | 61    |
| H(10)  | 6131  | 9012 | 5541  | 61    |
| H(12)  | 5643  | 7174 | 4202  | 85    |
| H(13)  | 5768  | 4543 | 3438  | 106   |
| H(14)  | 6685  | 2143 | 4022  | 92    |
| H(15)  | 7470  | 2352 | 5418  | 76    |
| H(20)  | 9132  | 4826 | 5464  | 79    |
| H(21)  | 10795 | 4309 | 4998  | 109   |
| H(22)  | 11895 | 2293 | 5822  | 149   |
| H(23)  | 11334 | 1042 | 7125  | 105   |
| H(25)  | 9968  | 673  | 8260  | 78    |
| H(26)  | 8339  | 1096 | 8761  | 65    |
| H(28A) | 6859  | 2939 | 9408  | 69    |
| H(28B) | 6712  | 995  | 9001  | 69    |
| H(29A) | 5184  | 3677 | 9164  | 66    |
| H(29B) | 5045  | 1599 | 9337  | 66    |
| H(30A) | 4382  | 2823 | 7853  | 76    |
| H(30B) | 4974  | 967  | 7830  | 76    |
| H(31A) | 6019  | 2461 | 6874  | 59    |
| H(31B) | 5760  | 4340 | 7314  | 59    |
| H(32A) | 6833  | 7763 | 10295 | 95    |
| H(32B) | 7953  | 8417 | 10565 | 95    |
| H(32C) | 7673  | 6371 | 10618 | 95    |

Table 6. Torsion angles [deg] for cd201441.

|                         |            |
|-------------------------|------------|
| C(2)-N(2)-C(1)-N(1)     | -1.5(18)   |
| C(32)-N(2)-C(1)-N(1)    | 179.5(13)  |
| C(2)-N(2)-C(1)-Au(1)    | -177.1(11) |
| C(32)-N(2)-C(1)-Au(1)   | 4(2)       |
| C(3)-N(1)-C(1)-N(2)     | 1.2(14)    |
| C(8)-N(1)-C(1)-N(2)     | -178.7(10) |
| C(3)-N(1)-C(1)-Au(1)    | 177.0(9)   |
| C(8)-N(1)-C(1)-Au(1)    | -2.9(16)   |
| I(1)-Au(1)-C(1)-N(2)    | -148(6)    |
| I(1)-Au(1)-C(1)-N(1)    | 37(8)      |
| C(1)-N(2)-C(2)-C(7)     | 178.9(19)  |
| C(32)-N(2)-C(2)-C(7)    | -2(3)      |
| C(1)-N(2)-C(2)-C(3)     | 1.2(19)    |
| C(32)-N(2)-C(2)-C(3)    | -179.8(14) |
| C(7)-C(2)-C(3)-C(4)     | -1(2)      |
| N(2)-C(2)-C(3)-C(4)     | 177.6(10)  |
| C(7)-C(2)-C(3)-N(1)     | -178.5(15) |
| N(2)-C(2)-C(3)-N(1)     | -0.4(15)   |
| C(1)-N(1)-C(3)-C(4)     | -178.2(11) |
| C(8)-N(1)-C(3)-C(4)     | 1.7(16)    |
| C(1)-N(1)-C(3)-C(2)     | -0.5(13)   |
| C(8)-N(1)-C(3)-C(2)     | 179.4(10)  |
| C(2)-C(3)-C(4)-C(5)     | 1.7(17)    |
| N(1)-C(3)-C(4)-C(5)     | 179.1(10)  |
| C(3)-C(4)-C(5)-C(6)     | -2.3(18)   |
| C(4)-C(5)-C(6)-C(7)     | 2(3)       |
| C(5)-C(6)-C(7)-C(2)     | 0(3)       |
| C(3)-C(2)-C(7)-C(6)     | 0(3)       |
| N(2)-C(2)-C(7)-C(6)     | -177.7(16) |
| C(1)-N(1)-C(8)-C(17)    | -111.7(11) |
| C(3)-N(1)-C(8)-C(17)    | 68.4(11)   |
| C(1)-N(1)-C(8)-C(9)     | 66.9(12)   |
| C(3)-N(1)-C(8)-C(9)     | -113.0(9)  |
| C(17)-C(8)-C(9)-C(10)   | 3.2(12)    |
| N(1)-C(8)-C(9)-C(10)    | -175.4(7)  |
| C(8)-C(9)-C(10)-C(11)   | -0.4(13)   |
| C(9)-C(10)-C(11)-C(16)  | -2.4(14)   |
| C(9)-C(10)-C(11)-C(12)  | 178.9(8)   |
| C(10)-C(11)-C(12)-C(13) | 178.5(10)  |
| C(16)-C(11)-C(12)-C(13) | -0.2(13)   |
| C(11)-C(12)-C(13)-C(14) | 0.4(16)    |
| C(12)-C(13)-C(14)-C(15) | 0.6(17)    |
| C(13)-C(14)-C(15)-C(16) | -1.6(16)   |
| C(14)-C(15)-C(16)-C(11) | 1.7(13)    |
| C(14)-C(15)-C(16)-C(17) | 179.8(8)   |
| C(10)-C(11)-C(16)-C(15) | -179.6(8)  |
| C(12)-C(11)-C(16)-C(15) | -0.8(12)   |
| C(10)-C(11)-C(16)-C(17) | 2.3(12)    |
| C(12)-C(11)-C(16)-C(17) | -179.0(7)  |
| C(9)-C(8)-C(17)-C(16)   | -3.3(11)   |
| N(1)-C(8)-C(17)-C(16)   | 175.4(6)   |
| C(9)-C(8)-C(17)-C(18)   | 176.4(7)   |
| N(1)-C(8)-C(17)-C(18)   | -5.0(10)   |
| C(15)-C(16)-C(17)-C(8)  | -177.6(7)  |
| C(11)-C(16)-C(17)-C(8)  | 0.5(11)    |
| C(15)-C(16)-C(17)-C(18) | 2.7(11)    |
| C(11)-C(16)-C(17)-C(18) | -179.1(7)  |
| C(8)-C(17)-C(18)-C(27)  | 68.7(10)   |
| C(16)-C(17)-C(18)-C(27) | -111.7(8)  |
| C(8)-C(17)-C(18)-C(19)  | -104.4(9)  |
| C(16)-C(17)-C(18)-C(19) | 75.3(10)   |
| C(27)-C(18)-C(19)-C(24) | -4.6(13)   |
| C(17)-C(18)-C(19)-C(24) | 168.4(9)   |

|                         |            |
|-------------------------|------------|
| C(27)-C(18)-C(19)-C(20) | 176.2(8)   |
| C(17)-C(18)-C(19)-C(20) | -10.8(12)  |
| C(18)-C(19)-C(20)-C(21) | 177.7(10)  |
| C(24)-C(19)-C(20)-C(21) | -1.6(16)   |
| C(19)-C(20)-C(21)-C(22) | 1.8(19)    |
| C(20)-C(21)-C(22)-C(23) | -2(3)      |
| C(21)-C(22)-C(23)-C(24) | 2(3)       |
| C(22)-C(23)-C(24)-C(25) | -177.8(16) |
| C(22)-C(23)-C(24)-C(19) | -2(2)      |
| C(18)-C(19)-C(24)-C(25) | -1.5(16)   |
| C(20)-C(19)-C(24)-C(25) | 177.7(10)  |
| C(18)-C(19)-C(24)-C(23) | -177.7(11) |
| C(20)-C(19)-C(24)-C(23) | 1.5(17)    |
| C(23)-C(24)-C(25)-C(26) | -179.3(11) |
| C(19)-C(24)-C(25)-C(26) | 4.6(18)    |
| C(24)-C(25)-C(26)-C(27) | -1.4(15)   |
| C(19)-C(18)-C(27)-N(3)  | -175.0(7)  |
| C(17)-C(18)-C(27)-N(3)  | 12.2(11)   |
| C(19)-C(18)-C(27)-C(26) | 7.8(11)    |
| C(17)-C(18)-C(27)-C(26) | -165.0(7)  |
| C(28)-N(3)-C(27)-C(18)  | -168.1(9)  |
| C(31)-N(3)-C(27)-C(18)  | 37.1(11)   |
| C(28)-N(3)-C(27)-C(26)  | 9.0(12)    |
| C(31)-N(3)-C(27)-C(26)  | -145.7(7)  |
| C(25)-C(26)-C(27)-C(18) | -4.9(11)   |
| C(25)-C(26)-C(27)-N(3)  | 177.8(8)   |
| C(27)-N(3)-C(28)-C(29)  | -172.3(8)  |
| C(31)-N(3)-C(28)-C(29)  | -15.0(13)  |
| N(3)-C(28)-C(29)-C(30)  | 31.7(15)   |
| C(28)-C(29)-C(30)-C(31) | -36.9(15)  |
| C(27)-N(3)-C(31)-C(30)  | 149.1(9)   |
| C(28)-N(3)-C(31)-C(30)  | -7.8(11)   |
| C(29)-C(30)-C(31)-N(3)  | 27.4(13)   |

---

Symmetry transformations used to generate equivalent atoms:

Table 7. Hydrogen bonds for cd201441 [Å and deg.]

| D-H...A | d(D-H) | d(H...A) | d(D...A) | <(DHA) |
|---------|--------|----------|----------|--------|
|---------|--------|----------|----------|--------|
